# Supplementary material for: De novo Transcriptome Assembly and the Putative Biosynthetic Pathway of Steroidal Sapogenins of Dioscorea composita
Source: PLoS One. 2015 Apr 10;10(4):e0124560. doi: 10.1371/journal.pone.0124560 (PMC4393236; doi:10.1371/journal.pone.0124560)
Supplement: S1 Table — (XLSX) [file pone.0124560.s001.xlsx]

## Sheet: Blast_NR
Query id	Query length	Hit1_gi	Hit1_acc	Hit1_length	Hit1_qStart	Hit1_qEnd	Hit1_hStart	Hit1_hEnd	Hit1_alignLength	Hit1_identity	Hit1_positive	Hit1_percentIdentity	Hit1_score	Hit1_eValue	Hit1_description
comp15_c0	287	356537381	XP_003537206.1	1141	4	285	741	834	94	36	60	38.2979	188	7.73e-15	PREDICTED: uncharacterized protein LOC100782759 [Glycine max]
comp15_c1	608	12323627	AAG51783.1	1142	1	510	332	503	172	82	107	47.6744	392	1.5e-40	reverse transcriptase, putative; 16838-20266 [Arabidopsis thaliana]
comp26_c0	243	321257146	XP_003193486.1	491	2	241	297	376	80	76	80	95	428	5.73e-49	homocitrate synthase [Cryptococcus gattii WM276] >gi|317459956|gb|ADV21699.1| homocitrate synthase, putative [Cryptococcus gattii WM276]
comp31_c0	209	389747288	EIM88467.1	168	2	208	96	164	69	59	63	85.5072	324	9.05e-37	translationally controlled tumor-associated [Stereum hirsutum FP-91666 SS1]
comp31_c1	281	302696527	XP_003037942.1	167	2	232	3	79	77	60	68	77.9221	258	1.85e-26	hypothetical protein SCHCODRAFT_63192 [Schizophyllum commune H4-8] >gi|300111639|gb|EFJ03040.1| hypothetical protein SCHCODRAFT_63192 [Schizophyllum commune H4-8]
comp36_c0	384	390605071	EIN14462.1	377	1	267	278	366	89	64	75	71.9101	361	2.67e-39	GDP-mannose 4,6-dehydratase [Punctularia strigosozonata HHB-11173 SS5]
comp36_c1	831	169862535	XP_001837894.1	374	3	794	18	278	264	224	242	84.8485	1226	1.31e-166	GDP-mannose 4,6-dehydratase [Coprinopsis cinerea okayama7#130] >gi|116501015|gb|EAU83910.1| GDP-mannose 4,6-dehydratase [Coprinopsis cinerea okayama7#130]
comp48_c0	326	255557971	XP_002520014.1	520	72	326	132	214	85	30	53	35.2941	139	2.17e-08	cytochrome P450, putative [Ricinus communis] >gi|223540778|gb|EEF42338.1| cytochrome P450, putative [Ricinus communis]
comp48_c1	244	225454627	XP_002266611.1	521	66	242	45	103	59	35	44	59.322	193	4.97e-16	PREDICTED: cytochrome P450 89A2-like [Vitis vinifera]
comp59_c0	344	356463700	AET08888.1	491	21	248	358	433	76	49	64	64.4737	288	8.18e-29	vacuolar processing enzyme 1 [Triticum monococcum]
comp59_c1	354	2414681	CAB16318.1	488	1	198	422	487	66	48	54	72.7273	279	1.58e-27	cysteine proteinase precursor [Vicia narbonensis]
comp62_c0	393	296090325	CBI40144.3	501	5	340	99	229	131	63	86	48.0916	247	8.15e-23	unnamed protein product [Vitis vinifera]
comp66_c0	211	297721275	NP_001173000.1	217	1	126	1	42	42	31	37	73.8095	181	1.94e-15	Os02g0528900 [Oryza sativa Japonica Group] >gi|255670961|dbj|BAH91729.1| Os02g0528900 [Oryza sativa Japonica Group]
comp66_c1	376	224099040	XP_002311359.1	1476	60	374	727	831	105	68	84	64.7619	291	3.91e-28	predicted protein [Populus trichocarpa] >gi|222851179|gb|EEE88726.1| predicted protein [Populus trichocarpa]
comp71_c0	228	332801050	NP_001193917.1	1614	3	227	1017	1091	75	34	38	45.3333	119	5.74e-06	uncharacterized protein LOC100140317 [Bos taurus]
comp74_c0	320	356498290	XP_003517986.1	1267	3	320	215	320	106	68	90	64.1509	375	1.16e-39	PREDICTED: uncharacterized protein LOC100819936 [Glycine max]
comp86_c1	350	89179403	ABD63139.1	1181	6	173	1045	1103	59	35	44	59.322	173	4.43e-18	Reverse transcriptase family protein [Asparagus officinalis]
comp90_c0	257	125559602	EAZ05138.1	321	1	252	144	227	84	48	68	57.1429	292	2.09e-30	hypothetical protein OsI_27331 [Oryza sativa Indica Group]
comp96_c0	206	347828060	CCD43757.1	172	1	195	47	110	65	31	41	47.6923	130	1.47e-08	similar to hydrophobic surface binding protein A [Botryotinia fuckeliana]
comp96_c1	349	361127211	EHK99187.1	148	141	326	85	146	62	37	43	59.6774	123	3.59e-07	hypothetical protein M7I_5020 [Glarea lozoyensis 74030]
comp100_c0	234	398396862	XP_003851889.1	573	3	233	39	115	77	62	68	80.5195	351	5.02e-38	hypothetical protein MYCGRDRAFT_43176 [Mycosphaerella graminicola IPO323] >gi|339471769|gb|EGP86865.1| hypothetical protein MYCGRDRAFT_43176 [Mycosphaerella graminicola IPO323]
comp107_c0	243	125550610	EAY96319.1	1056	44	217	928	985	58	27	35	46.5517	129	2.96e-07	hypothetical protein OsI_18221 [Oryza sativa Indica Group]
comp113_c0	226	147783182	CAN68669.1	1360	7	225	111	183	73	56	62	76.7123	297	1.02e-29	hypothetical protein VITISV_039388 [Vitis vinifera]
comp129_c0	459	398412115	XP_003857387.1	202	153	458	101	202	102	84	95	82.3529	445	3.99e-53	60S ribosomal protein L16 [Mycosphaerella graminicola IPO323] >gi|339477272|gb|EGP92363.1| hypothetical protein MYCGRDRAFT_102406 [Mycosphaerella graminicola IPO323]
comp130_c0	329	326528123	BAJ89113.1	846	90	329	115	197	83	65	74	78.3133	331	5.42e-34	predicted protein [Hordeum vulgare subsp. vulgare]
comp133_c0	291	357142229	XP_003572501.1	1064	2	145	1017	1064	48	35	45	72.9167	199	2.6e-16	PREDICTED: 125 kDa kinesin-related protein-like [Brachypodium distachyon]
comp134_c0	647	147784790	CAN75225.1	793	4	645	387	616	230	116	150	50.4348	564	1.47e-64	hypothetical protein VITISV_035856 [Vitis vinifera]
comp137_c0	205	1296515	CAA64763.1	485	92	205	137	174	38	26	32	68.4211	160	8.65e-12	legumin-like protein [Dioscorea caucasica]
comp144_c0	248	326515998	BAJ88022.1	623	2	247	286	367	82	78	81	95.122	409	9.13e-46	predicted protein [Hordeum vulgare subsp. vulgare]
comp159_c0	578	321253886	XP_003192886.1	503	2	574	216	406	191	171	184	89.5288	919	7.32e-120	UTP-glucose-1-phosphate uridylyltransferase [Cryptococcus gattii WM276] >gi|317459355|gb|ADV21099.1| UTP-glucose-1-phosphate uridylyltransferase, putative [Cryptococcus gattii WM276]
comp168_c0	447	253761577	XP_002489165.1	933	25	447	713	852	145	47	79	32.4138	211	2.86e-17	hypothetical protein SORBIDRAFT_0015s007030 [Sorghum bicolor] >gi|241947177|gb|EES20322.1| hypothetical protein SORBIDRAFT_0015s007030 [Sorghum bicolor]
comp177_c0	401	242079455	XP_002444496.1	459	7	396	325	454	130	60	95	46.1538	352	1.65e-37	hypothetical protein SORBIDRAFT_07g022850 [Sorghum bicolor] >gi|241940846|gb|EES13991.1| hypothetical protein SORBIDRAFT_07g022850 [Sorghum bicolor]
comp177_c1	292	57834130	CAE05522.2	723	1	282	571	664	94	41	60	43.617	232	7.97e-21	OSJNBa0038P21.15 [Oryza sativa Japonica Group]
comp181_c0	268	326469098	EGD93107.1	118	1	126	77	118	42	41	42	97.619	215	9.63e-21	hypothetical protein TESG_00663 [Trichophyton tonsurans CBS 112818]
comp187_c0	299	398406487	XP_003854709.1	296	1	102	252	285	34	26	31	76.4706	149	2.88e-10	hypothetical protein MYCGRDRAFT_103011 [Mycosphaerella graminicola IPO323] >gi|339474593|gb|EGP89685.1| hypothetical protein MYCGRDRAFT_103011 [Mycosphaerella graminicola IPO323]
comp198_c0	218	159127837	EDP52952.1	781	1	213	446	516	71	46	55	64.7887	262	3.05e-25	extracellular serine-rich protein, putative [Aspergillus fumigatus A1163]
comp198_c1	213	156057483	XP_001594665.1	761	3	209	495	563	69	48	58	69.5652	273	9.27e-27	hypothetical protein SS1G_04473 [Sclerotinia sclerotiorum 1980] >gi|154702258|gb|EDO01997.1| hypothetical protein SS1G_04473 [Sclerotinia sclerotiorum 1980 UF-70]
comp200_c0	541	87116458	BAE79381.1	532	114	539	212	333	144	45	71	31.25	190	2.31e-14	unnamed protein product [Ipomoea batatas]
comp202_c0	520	225451088	XP_002265307.1	150	94	519	3	148	146	60	92	41.0959	298	1.9e-31	PREDICTED: histidine-containing phosphotransfer protein 1 [Vitis vinifera] >gi|298205016|emb|CBI34323.3| unnamed protein product [Vitis vinifera]
comp211_c0	232	116310100	CAH67120.1	2933	85	225	1936	1982	47	28	38	59.5745	162	1.34e-11	H0502G05.11 [Oryza sativa Indica Group]
comp224_c0	723	82949279	BAE53367.1	487	19	723	249	483	235	165	197	70.2128	857	7.14e-110	cyclin B1 [Allium cepa]
comp228_c0	294	109804169	CAI53943.1	221	4	294	56	153	98	59	79	60.2041	337	1.36e-37	phospholipase D [Triticum durum]
comp228_c1	321	358344689	XP_003636420.1	734	9	317	467	569	103	77	86	74.7573	415	5.83e-46	Phospholipase D epsilon [Medicago truncatula] >gi|355502355|gb|AES83558.1| Phospholipase D epsilon [Medicago truncatula]
comp241_c0	329	224102127	XP_002334209.1	163	3	212	112	163	74	42	44	56.7568	153	2.97e-11	predicted protein [Populus trichocarpa] >gi|224103161|ref|XP_002334085.1| predicted protein [Populus trichocarpa] >gi|224109280|ref|XP_002333279.1| predicted protein [Populus trichocarpa] >gi|224111682|ref|XP_002332903.1| predicted protein [Populus trichocarpa] >gi|222833725|gb|EEE72202.1| predicted protein [Populus trichocarpa] >gi|222835898|gb|EEE74319.1| predicted protein [Populus trichocarpa]…
comp245_c0	408	147784790	CAN75225.1	793	1	291	522	619	98	64	76	65.3061	340	8.45e-39	hypothetical protein VITISV_035856 [Vitis vinifera]
comp250_c0	208	320589972	EFX02428.1	205	2	208	1	69	69	54	61	78.2609	204	9.65e-19	60S ribosomal protein l13 [Grosmannia clavigera kw1407]
comp266_c0	327	297738811	CBI28056.3	694	9	326	113	214	107	36	57	33.6449	128	6.63e-07	unnamed protein product [Vitis vinifera]
comp268_c0	225	356565309	XP_003550884.1	741	2	220	592	662	73	43	51	58.9041	222	6.78e-20	PREDICTED: subtilisin-like protease SDD1-like [Glycine max]
comp269_c0	258	222622664	EEE56796.1	347	1	258	175	261	87	55	67	63.2184	237	1.41e-22	hypothetical protein OsJ_06381 [Oryza sativa Japonica Group]
comp269_c1	208	388518641	AFK47382.1	364	5	208	154	221	68	39	51	57.3529	161	3.7e-12	unknown [Medicago truncatula]
comp272_c0	274	218201539	EEC83966.1	565	2	274	360	450	91	64	77	70.3297	280	8.13e-28	hypothetical protein OsI_30082 [Oryza sativa Indica Group]
comp275_c0	215	392579678	EIW72805.1	343	3	215	216	286	71	63	67	88.7324	299	1.76e-31	hypothetical protein TREMEDRAFT_41991 [Tremella mesenterica DSM 1558]
comp275_c1	288	392579678	EIW72805.1	343	3	287	126	220	95	83	90	87.3684	443	4.67e-52	hypothetical protein TREMEDRAFT_41991 [Tremella mesenterica DSM 1558]
comp291_c0	514	358249240	NP_001240016.1	294	122	514	1	131	131	106	120	80.916	563	2.6e-69	cell division control protein 2 homolog [Glycine max] >gi|336390563|gb|AEI54341.1| serine threonine tyrosine kinase [Glycine max]
comp291_c1	223	63191998	AAY34905.1	111	1	219	1	73	73	65	70	89.0411	361	7.38e-43	cyclin-dependent kinase, partial [Prunus armeniaca]
comp298_c0	394	2244916	CAB10338.1	655	1	372	92	215	124	39	66	31.4516	204	1.11e-16	hypothetical protein [Arabidopsis thaliana] >gi|7268308|emb|CAB78602.1| hypothetical protein [Arabidopsis thaliana]
comp299_c0	485	398408880	XP_003855905.1	150	21	440	1	140	140	125	133	89.2857	671	7.45e-88	40S ribosomal protein S19 [Mycosphaerella graminicola IPO323] >gi|339475790|gb|EGP90881.1| hypothetical protein MYCGRDRAFT_98180 [Mycosphaerella graminicola IPO323]
comp301_c0	454	115470847	NP_001059022.1	585	2	328	1	109	109	92	103	84.4037	530	6.96e-62	Os07g0176600 [Oryza sativa Japonica Group] >gi|75325577|sp|Q6ZEZ5.1|NEK3_ORYSJ RecName: Full=Serine/threonine-protein kinase Nek3; AltName: Full=NimA-related protein kinase 3; AltName: Full=OsNek3 >gi|34393832|dbj|BAC83436.1| putative NIMA-related protein kinase [Oryza sativa Japonica Group] >gi|113610558|dbj|BAF20936.1| Os07g0176600 [Oryza sativa Japonica Group] >gi|215694942|dbj|BAG90133.1| unn…
comp315_c0	335	255580411	XP_002531032.1	392	22	306	8	102	95	41	67	43.1579	222	5.33e-20	pentatricopeptide repeat-containing protein, putative [Ricinus communis] >gi|223529385|gb|EEF31349.1| pentatricopeptide repeat-containing protein, putative [Ricinus communis]
comp323_c0	552	389738844	EIM80040.1	273	3	551	54	236	183	145	160	79.235	672	7.43e-86	hypothetical protein STEHIDRAFT_68925 [Stereum hirsutum FP-91666 SS1]
comp326_c0	211	359473499	XP_003631308.1	464	4	204	276	343	68	47	56	69.1176	267	1.13e-26	PREDICTED: uncharacterized protein LOC100853922 [Vitis vinifera]
comp330_c0	237	326489775	BAK01868.1	1175	1	234	877	954	78	64	72	82.0513	341	1.48e-35	predicted protein [Hordeum vulgare subsp. vulgare]
comp336_c0	295	361128644	EHL00574.1	510	2	295	75	172	98	86	93	87.7551	451	7.11e-52	putative ATP synthase subunit beta, mitochondrial [Glarea lozoyensis 74030]
comp337_c0	590	225016150	ACN78974.1	1261	11	202	62	125	64	29	38	45.3125	182	5.5e-13	retrotransposon protein [Glycine max] >gi|225016158|gb|ACN78981.1| retrotransposon protein [Glycine max]
comp337_c1	261	224143665	XP_002336067.1	262	8	256	147	229	83	37	52	44.5783	137	6.05e-09	predicted protein [Populus trichocarpa] >gi|222869875|gb|EEF07006.1| predicted protein [Populus trichocarpa]
comp340_c0	271	58261750	XP_568285.1	527	3	266	290	376	88	67	78	76.1364	363	1.71e-39	hypothetical protein CNM02030 [Cryptococcus neoformans var. neoformans JEC21] >gi|134118517|ref|XP_772032.1| hypothetical protein CNBM1900 [Cryptococcus neoformans var. neoformans B-3501A] >gi|50254638|gb|EAL17385.1| hypothetical protein CNBM1900 [Cryptococcus neoformans var. neoformans B-3501A] >gi|57230458|gb|AAW46768.1| conserved hypothetical protein [Cryptococcus neoformans var. neoformans JE…
comp340_c1	442	321265277	XP_003197355.1	527	5	442	143	288	146	105	127	71.9178	482	1.85e-55	hypothetical protein CGB_M3140W [Cryptococcus gattii WM276] >gi|317463834|gb|ADV25568.1| Conserved hypothetical protein [Cryptococcus gattii WM276]
comp348_c0	241	58268224	XP_571268.1	527	1	240	58	137	80	64	72	80	362	1.59e-39	p68-like protein [Cryptococcus neoformans var. neoformans JEC21] >gi|57227503|gb|AAW43961.1| p68-like protein, putative [Cryptococcus neoformans var. neoformans JEC21]
comp349_c0	281	302143678	CBI22539.3	585	2	247	85	165	82	44	58	53.6585	223	8.88e-20	unnamed protein product [Vitis vinifera]
comp349_c1	328	357498605	XP_003619591.1	758	61	327	1	89	89	61	73	68.5393	337	6.19e-35	Chaperone protein dnaJ [Medicago truncatula] >gi|355494606|gb|AES75809.1| Chaperone protein dnaJ [Medicago truncatula]
comp358_c0	359	227438135	ACP30557.1	886	8	271	148	234	88	45	56	51.1364	146	4.31e-09	disease resistance protein [Brassica rapa subsp. pekinensis]
comp361_c0	346	255544031	XP_002513078.1	1096	26	256	1012	1088	77	35	48	45.4545	171	2.17e-12	leucine-rich repeat-containing protein, putative [Ricinus communis] >gi|223548089|gb|EEF49581.1| leucine-rich repeat-containing protein, putative [Ricinus communis]
comp372_c0	201	398410372	XP_003856539.1	234	20	184	39	99	62	38	48	61.2903	169	7.17e-14	hypothetical protein MYCGRDRAFT_102725 [Mycosphaerella graminicola IPO323] >gi|339476424|gb|EGP91515.1| hypothetical protein MYCGRDRAFT_102725 [Mycosphaerella graminicola IPO323]
comp381_c0	228	327298723	XP_003234055.1	451	2	226	135	209	75	62	70	82.6667	351	3.12e-38	stearic acid desaturase [Trichophyton rubrum CBS 118892] >gi|326464233|gb|EGD89686.1| stearic acid desaturase [Trichophyton rubrum CBS 118892]
comp394_c0	223	296088382	CBI37373.3	710	8	223	634	705	72	64	67	88.8889	319	3.6e-33	unnamed protein product [Vitis vinifera]
comp402_c0	506	321258610	XP_003194026.1	631	3	506	310	478	169	108	132	63.9053	517	2.07e-59	integral membrane peptide transporter [Cryptococcus gattii WM276] >gi|317460496|gb|ADV22239.1| Integral membrane peptide transporter, putative [Cryptococcus gattii WM276]
comp407_c0	376	31249765	AAP46257.1	1335	112	366	346	430	85	45	63	52.9412	259	2.07e-24	putative polyprotein [Oryza sativa Japonica Group] >gi|108711922|gb|ABF99717.1| retrotransposon protein, putative, unclassified [Oryza sativa Japonica Group]
comp416_c0	442	392593732	EIW83057.1	155	47	244	1	66	66	46	55	69.697	269	1.83e-27	hypothetical protein CONPUDRAFT_121394 [Coniophora puteana RWD-64-598 SS2]
comp416_c1	204	170092359	XP_001877401.1	172	3	194	96	159	64	44	56	68.75	230	8.23e-23	predicted protein [Laccaria bicolor S238N-H82] >gi|164647260|gb|EDR11504.1| predicted protein [Laccaria bicolor S238N-H82]
comp418_c0	324	398390790	XP_003848855.1	397	1	324	125	232	108	66	82	61.1111	329	8.45e-35	hypothetical protein MYCGRDRAFT_101415 [Mycosphaerella graminicola IPO323] >gi|339468731|gb|EGP83831.1| hypothetical protein MYCGRDRAFT_101415 [Mycosphaerella graminicola IPO323]
comp434_c0	212	255637089	ACU18876.1	299	115	210	1	32	32	32	32	100	168	2.66e-13	unknown [Glycine max]
comp464_c0	219	323650176	ADX97174.1	86	5	217	9	79	71	57	67	80.2817	304	1.32e-34	60S ribosomal protein l23 [Perca flavescens]
comp466_c0	292	194698814	ACF83491.1	89	1	153	33	83	51	45	48	88.2353	246	2.01e-25	unknown [Zea mays]
comp470_c0	208	255538132	XP_002510131.1	509	1	198	411	473	67	31	44	46.2687	151	1.5e-10	cytochrome P450, putative [Ricinus communis] >gi|223550832|gb|EEF52318.1| cytochrome P450, putative [Ricinus communis]
comp492_c0	292	357512299	XP_003626438.1	350	117	272	79	133	55	38	43	69.0909	189	2.64e-24	Aldo/keto-reductase family protein [Medicago truncatula] >gi|355501453|gb|AES82656.1| Aldo/keto-reductase family protein [Medicago truncatula] >gi|388512861|gb|AFK44492.1| unknown [Medicago truncatula]
comp501_c0	209	363583360	AEW27231.1	139	2	208	23	91	69	65	67	94.2029	352	2.52e-41	translation elongation factor 1-alpha [Anisomeridium ubianum]
comp504_c0	576	297743009	CBI35876.3	363	71	472	203	346	145	69	93	47.5862	215	3.71e-18	unnamed protein product [Vitis vinifera]
comp547_c0	583	51854321	AAU10702.1	426	15	278	293	382	95	42	58	44.2105	151	1.83e-09	unknown protein [Oryza sativa Japonica Group]
comp560_c0	202	225432189	XP_002268620.1	746	1	192	365	428	64	43	49	67.1875	242	1.14e-22	PREDICTED: uncharacterized protein LOC100247698 [Vitis vinifera]
comp593_c0	433	357162646	XP_003579476.1	398	3	158	323	374	52	30	39	57.6923	173	1.03e-12	PREDICTED: putative B3 domain-containing protein Os04g0676650-like [Brachypodium distachyon]
comp593_c1	222	125559822	EAZ05270.1	413	27	221	249	313	65	45	54	69.2308	253	6.96e-25	hypothetical protein OsI_27472 [Oryza sativa Indica Group]
comp595_c0	340	195157738	XP_002019753.1	117	108	320	44	114	71	47	52	66.1972	228	2.8e-22	GL12038 [Drosophila persimilis] >gi|198455284|ref|XP_002138042.1| GA26170 [Drosophila pseudoobscura pseudoobscura] >gi|194116344|gb|EDW38387.1| GL12038 [Drosophila persimilis] >gi|198133179|gb|EDY68600.1| GA26170 [Drosophila pseudoobscura pseudoobscura]
comp597_c0	366	225438458	XP_002275101.1	1202	1	219	45	124	89	36	46	40.4494	129	7.34e-07	PREDICTED: uncharacterized protein LOC100266278 [Vitis vinifera]
comp631_c0	718	357120154	XP_003561794.1	1357	113	718	8	214	210	99	137	47.1429	472	1.01e-50	PREDICTED: G-type lectin S-receptor-like serine/threonine-protein kinase At2g19130-like [Brachypodium distachyon]
comp656_c0	234	225428207	XP_002279084.1	148	2	145	5	52	49	28	37	57.1429	130	1.81e-08	PREDICTED: indole-3-acetic acid-induced protein ARG7-like [Vitis vinifera]
comp657_c0	314	147785392	CAN68680.1	124	5	253	1	80	86	40	52	46.5116	149	7.94e-11	hypothetical protein VITISV_041943 [Vitis vinifera]
comp668_c0	509	356499352	XP_003518505.1	275	2	214	147	217	71	51	60	71.831	283	4.14e-28	PREDICTED: glucan endo-1,3-beta-glucosidase-like protein 1-like [Glycine max]
comp680_c0	227	224124974	XP_002319471.1	703	5	226	492	565	74	56	65	75.6757	303	7.05e-31	predicted protein [Populus trichocarpa] >gi|222857847|gb|EEE95394.1| predicted protein [Populus trichocarpa]
comp686_c0	390	398409526	XP_003856228.1	300	22	390	1	123	123	108	115	87.8049	585	2.98e-73	60S ribosomal protein L5 [Mycosphaerella graminicola IPO323] >gi|339476113|gb|EGP91204.1| hypothetical protein MYCGRDRAFT_102365 [Mycosphaerella graminicola IPO323]
comp688_c0	263	8778245	AAF79254.1	755	5	244	675	754	80	39	50	48.75	202	6.99e-17	F12K21.6 [Arabidopsis thaliana]
comp702_c0	401	14550183	AAK67169.1	266	9	401	1	131	131	103	121	78.626	524	1.61e-64	NADP-dependent mannitol dehydrogenase [Passalora fulva]
comp711_c0	588	147794682	CAN60366.1	1274	255	557	1147	1247	101	45	63	44.5545	233	8.93e-32	hypothetical protein VITISV_031870 [Vitis vinifera]
comp770_c1	296	242037293	XP_002466041.1	303	68	178	24	60	37	26	30	70.2703	148	4.38e-10	hypothetical protein SORBIDRAFT_01g050530 [Sorghum bicolor] >gi|241919895|gb|EER93039.1| hypothetical protein SORBIDRAFT_01g050530 [Sorghum bicolor]
comp779_c0	350	89330215	CAJ84166.1	65	236	349	19	56	38	37	38	97.3684	201	8.79e-19	WOX11/12A protein [Zea mays] >gi|89330217|emb|CAJ84167.1| WOX11/12B protein [Zea mays]
comp781_c0	262	49328005	AAT58706.1	540	1	261	427	513	87	77	83	88.5057	419	2.97e-47	putative dynamin [Oryza sativa Japonica Group]
comp788_c0	515	359476838	XP_002266706.2	358	64	513	4	155	152	130	137	85.5263	712	6.67e-91	PREDICTED: NAC domain-containing protein 7-like [Vitis vinifera]
comp802_c0	737	321258610	XP_003194026.1	631	2	688	380	608	229	158	187	68.9956	665	1.03e-79	integral membrane peptide transporter [Cryptococcus gattii WM276] >gi|317460496|gb|ADV22239.1| Integral membrane peptide transporter, putative [Cryptococcus gattii WM276]
comp810_c0	370	255565057	XP_002523521.1	377	2	370	143	268	126	70	88	55.5556	371	9.34e-41	chitinase, putative [Ricinus communis] >gi|223537228|gb|EEF38860.1| chitinase, putative [Ricinus communis]
comp847_c0	424	299748910	XP_002911329.1	77	243	392	1	50	50	38	43	76	128	5.68e-08	hypothetical protein CC1G_14324 [Coprinopsis cinerea okayama7#130] >gi|298408192|gb|EFI27835.1| hypothetical protein CC1G_14324 [Coprinopsis cinerea okayama7#130]
comp953_c0	345	293333969	NP_001168155.1	341	20	295	36	101	92	49	57	53.2609	232	1.62e-21	uncharacterized protein LOC100381906 [Zea mays] >gi|223946353|gb|ACN27260.1| unknown [Zea mays]
comp1008_c0	1054	393218181	EJD03669.1	247	50	604	68	247	186	63	90	33.871	249	4.73e-22	proteasome activator pa28, REG alpha/beta subunit [Fomitiporia mediterranea MF3/22]
comp1012_c0	540	222622403	EEE56535.1	1441	2	538	514	692	179	123	149	68.7151	530	2.74e-59	hypothetical protein OsJ_05840 [Oryza sativa Japonica Group]
comp1012_c1	234	75318232	O24367.1	1441	1	234	443	521	79	60	67	75.9494	328	8.32e-34	RecName: Full=Pleiotropic drug resistance protein TUR2; Short=Protein Turion 2 >gi|1514643|emb|CAA94437.1| PDR5-like ABC transporter [Spirodela polyrhiza]
comp1018_c0	533	357119607	XP_003561527.1	469	2	532	251	440	192	96	125	50	457	1.16e-51	PREDICTED: uncharacterized protein LOC100837225 [Brachypodium distachyon]
comp1035_c0	433	296088242	CBI14832.3	319	121	414	182	284	103	38	49	36.8932	120	6.92e-06	unnamed protein product [Vitis vinifera]
comp1037_c0	250	224124708	XP_002319402.1	156	25	249	60	146	87	38	49	43.6782	157	4.58e-12	predicted protein [Populus trichocarpa] >gi|222857778|gb|EEE95325.1| predicted protein [Populus trichocarpa]
comp1037_c1	265	297822751	XP_002879258.1	177	25	198	1	58	58	46	51	79.3103	253	8.35e-26	hypothetical protein ARALYDRAFT_481935 [Arabidopsis lyrata subsp. lyrata] >gi|297325097|gb|EFH55517.1| hypothetical protein ARALYDRAFT_481935 [Arabidopsis lyrata subsp. lyrata]
comp1048_c0	324	332322102	CCA65997.1	1363	3	275	174	264	91	40	56	43.956	207	4.19e-17	hypothetical protein [Beta vulgaris subsp. vulgaris]
comp1053_c0	293	58264446	XP_569379.1	444	13	291	288	380	93	79	87	84.9462	428	5.02e-49	phosphopyruvate hydratase [Cryptococcus neoformans var. neoformans JEC21] >gi|57225611|gb|AAW42072.1| phosphopyruvate hydratase, putative [Cryptococcus neoformans var. neoformans JEC21]
comp1054_c0	394	357115094	XP_003559327.1	210	287	394	108	143	36	26	32	72.2222	141	2.71e-09	PREDICTED: uncharacterized protein LOC100843813 [Brachypodium distachyon]
comp1056_c0	317	398391699	XP_003849309.1	263	4	315	46	149	104	72	85	69.2308	375	1.21e-42	hypothetical protein MYCGRDRAFT_105661 [Mycosphaerella graminicola IPO323] >gi|339469186|gb|EGP84285.1| hypothetical protein MYCGRDRAFT_105661 [Mycosphaerella graminicola IPO323]
comp1065_c0	213	169626513	XP_001806656.1	91	1	213	4	74	71	67	68	94.3662	343	1.62e-40	hypothetical protein SNOG_16548 [Phaeosphaeria nodorum SN15] >gi|111054968|gb|EAT76088.1| hypothetical protein SNOG_16548 [Phaeosphaeria nodorum SN15]
comp1070_c1	351	2244916	CAB10338.1	655	1	351	116	232	117	45	66	38.4615	244	3.26e-22	hypothetical protein [Arabidopsis thaliana] >gi|7268308|emb|CAB78602.1| hypothetical protein [Arabidopsis thaliana]
comp1081_c0	533	108862853	ABA99600.2	1432	282	521	1318	1403	87	30	45	34.4828	125	4.04e-06	retrotransposon protein, putative, unclassified [Oryza sativa Japonica Group]
comp1091_c0	360	225463167	XP_002267200.1	1549	3	359	149	267	119	86	110	72.2689	516	2.31e-58	PREDICTED: DNA (cytosine-5)-methyltransferase 1B-like [Vitis vinifera]
comp1093_c0	574	225456755	XP_002268980.1	893	2	310	791	893	103	69	89	66.9903	332	7.3e-33	PREDICTED: pentatricopeptide repeat-containing protein At1g74600, chloroplastic [Vitis vinifera] >gi|297733984|emb|CBI15231.3| unnamed protein product [Vitis vinifera]
comp1097_c0	582	255560281	XP_002521158.1	990	2	493	88	261	177	80	113	45.1977	341	6.6e-34	conserved hypothetical protein [Ricinus communis] >gi|223539727|gb|EEF41309.1| conserved hypothetical protein [Ricinus communis]
comp1098_c0	236	296411573	XP_002835505.1	60	143	235	1	31	31	29	31	93.5484	159	4.03e-13	hypothetical protein [Tuber melanosporum Mel28] >gi|295629289|emb|CAZ79662.1| unnamed protein product [Tuber melanosporum]
comp1100_c0	376	147853719	CAN80222.1	487	1	375	301	424	125	97	110	77.6	532	2.08e-63	hypothetical protein VITISV_027895 [Vitis vinifera]
comp1103_c0	326	297738653	CBI27898.3	386	24	209	5	75	71	33	43	46.4789	142	5.84e-09	unnamed protein product [Vitis vinifera]
comp1117_c0	236	297829948	XP_002882856.1	753	2	235	168	245	78	47	59	60.2564	246	4.95e-23	pentatricopeptide repeat-containing protein [Arabidopsis lyrata subsp. lyrata] >gi|297328696|gb|EFH59115.1| pentatricopeptide repeat-containing protein [Arabidopsis lyrata subsp. lyrata]
comp1159_c0	646	222612692	EEE50824.1	1594	213	635	673	816	144	57	85	39.5833	297	1.35e-27	hypothetical protein OsJ_31232 [Oryza sativa Japonica Group]
comp1159_c1	517	242082377	XP_002445957.1	587	7	516	175	344	171	47	83	27.4854	188	3.32e-14	hypothetical protein SORBIDRAFT_07g028675 [Sorghum bicolor] >gi|241942307|gb|EES15452.1| hypothetical protein SORBIDRAFT_07g028675 [Sorghum bicolor]
comp1160_c0	213	308450159	XP_003088200.1	122	2	208	1	69	69	45	52	65.2174	217	3.23e-21	hypothetical protein CRE_03576 [Caenorhabditis remanei] >gi|308248801|gb|EFO92753.1| hypothetical protein CRE_03576 [Caenorhabditis remanei]
comp1172_c0	513	358343399	XP_003635790.1	2313	108	509	1354	1491	144	52	76	36.1111	217	1.28e-17	Receptor-like kinase [Medicago truncatula] >gi|355501725|gb|AES82928.1| Receptor-like kinase [Medicago truncatula]
comp1202_c1	364	255586109	XP_002533718.1	199	116	340	107	182	76	25	44	32.8947	132	3.68e-08	conserved hypothetical protein [Ricinus communis] >gi|223526373|gb|EEF28663.1| conserved hypothetical protein [Ricinus communis]
comp1205_c0	502	326515110	BAK03468.1	453	2	451	299	448	150	108	127	72	613	5.76e-75	predicted protein [Hordeum vulgare subsp. vulgare]
comp1205_c1	358	359806067	NP_001240926.1	464	1	357	183	301	119	100	107	84.0336	540	5.89e-65	uncharacterized protein LOC100807555 precursor [Glycine max] >gi|304421394|gb|ADM32496.1| phytase [Glycine max]
comp1207_c0	417	90657649	ABD96947.1	505	3	401	235	370	140	66	98	47.1429	331	2.31e-34	hypothetical protein [Cleome spinosa]
comp1217_c0	211	255585169	XP_002533289.1	191	2	157	70	121	52	43	48	82.6923	241	3.64e-24	conserved hypothetical protein [Ricinus communis] >gi|223526892|gb|EEF29100.1| conserved hypothetical protein [Ricinus communis]
comp1234_c0	243	378729038	EHY55497.1	183	16	243	1	76	76	75	75	98.6842	391	1.79e-46	ADP-ribosylation factor [Exophiala dermatitidis NIH/UT8656]
comp1238_c0	279	356572787	XP_003554547.1	1269	2	133	595	643	49	28	32	57.1429	133	1.12e-07	PREDICTED: DNA mismatch repair protein Msh6-1-like [Glycine max]
comp1252_c0	205	398390165	XP_003848543.1	89	55	204	1	50	50	41	46	82	206	5.84e-20	hypothetical protein MYCGRDRAFT_88109 [Mycosphaerella graminicola IPO323] >gi|339468418|gb|EGP83519.1| hypothetical protein MYCGRDRAFT_88109 [Mycosphaerella graminicola IPO323]
comp1273_c0	407	218194582	EEC77009.1	815	12	374	645	766	126	42	62	33.3333	127	1.44e-06	hypothetical protein OsI_15342 [Oryza sativa Indica Group]
comp1273_c1	660	242094374	XP_002437677.1	225	144	548	52	181	136	38	60	27.9412	157	1.21e-10	hypothetical protein SORBIDRAFT_10g000610 [Sorghum bicolor] >gi|241915900|gb|EER89044.1| hypothetical protein SORBIDRAFT_10g000610 [Sorghum bicolor]
comp1279_c0	758	242075654	XP_002447763.1	446	282	758	288	446	159	125	146	78.6164	719	1.64e-89	hypothetical protein SORBIDRAFT_06g015200 [Sorghum bicolor] >gi|241938946|gb|EES12091.1| hypothetical protein SORBIDRAFT_06g015200 [Sorghum bicolor]
comp1279_c1	446	242065256	XP_002453917.1	439	3	446	138	285	148	103	118	69.5946	568	7.88e-69	hypothetical protein SORBIDRAFT_04g021400 [Sorghum bicolor] >gi|241933748|gb|EES06893.1| hypothetical protein SORBIDRAFT_04g021400 [Sorghum bicolor]
comp1317_c0	911	224122204	XP_002330565.1	533	326	904	88	277	193	112	147	58.0311	577	8.99e-67	predicted protein [Populus trichocarpa] >gi|222872123|gb|EEF09254.1| predicted protein [Populus trichocarpa]
comp1321_c1	1279	255572448	XP_002527160.1	189	378	545	137	189	56	38	40	67.8571	175	4.02e-12	xyloglucan:xyloglucosyl transferase, putative [Ricinus communis] >gi|223533481|gb|EEF35226.1| xyloglucan:xyloglucosyl transferase, putative [Ricinus communis]
comp1325_c0	230	301016726	BAJ11784.1	215	43	174	36	79	44	27	31	61.3636	127	3.19e-08	dehydration responsive protein [Corchorus olitorius]
comp1336_c0	242	218187775	EEC70202.1	156	2	241	28	105	80	48	63	60	248	2.48e-25	hypothetical protein OsI_00948 [Oryza sativa Indica Group]
comp1348_c0	755	40714668	AAR88574.1	839	5	724	505	737	240	99	134	41.25	472	2.11e-51	putative transposon protein [Oryza sativa Japonica Group] >gi|108711944|gb|ABF99739.1| transposon protein, putative, Mutator sub-class [Oryza sativa Japonica Group]
comp1363_c0	421	321262623	XP_003196030.1	826	1	420	342	481	140	133	138	95	717	1.61e-87	translation elongation factor 2 [Cryptococcus gattii WM276] >gi|317462505|gb|ADV24243.1| translation elongation factor 2 [Cryptococcus gattii WM276]
comp1375_c0	351	392579249	EIW72376.1	207	7	351	1	115	115	104	110	90.4348	487	6.36e-60	hypothetical protein TREMEDRAFT_41704 [Tremella mesenterica DSM 1558]
comp1383_c0	913	332322101	CCA65996.1	744	1	258	221	301	86	40	54	46.5116	204	2.65e-15	hypothetical protein [Beta vulgaris subsp. vulgaris]
comp1405_c0	333	297598019	NP_001044933.2	349	2	220	19	91	73	57	65	78.0822	298	1.21e-30	Os01g0870500 [Oryza sativa Japonica Group] >gi|222619605|gb|EEE55737.1| hypothetical protein OsJ_04235 [Oryza sativa Japonica Group] >gi|255673906|dbj|BAF06847.2| Os01g0870500 [Oryza sativa Japonica Group]
comp1416_c0	383	224068699	XP_002302803.1	573	13	336	465	573	109	46	65	42.2018	193	2.88e-15	predicted protein [Populus trichocarpa] >gi|222844529|gb|EEE82076.1| predicted protein [Populus trichocarpa]
comp1421_c0	643	281331144	BAI59100.1	346	19	642	1	208	208	207	208	99.5192	1068	3.61e-144	photosystem II protein D1 [Alexandrium tamarense]
comp1423_c0	348	169610375	XP_001798606.1	257	155	340	196	257	62	48	53	77.4194	248	5.88e-24	hypothetical protein SNOG_08289 [Phaeosphaeria nodorum SN15] >gi|111063445|gb|EAT84565.1| hypothetical protein SNOG_08289 [Phaeosphaeria nodorum SN15]
comp1423_c1	684	380489387	CCF36739.1	254	1	498	24	189	166	136	149	81.9277	727	1.26e-93	pectate lyase E [Colletotrichum higginsianum]
comp1429_c0	476	296083283	CBI22919.3	848	134	418	432	565	134	46	64	34.3284	135	1.82e-07	unnamed protein product [Vitis vinifera]
comp1429_c1	314	147817663	CAN64499.1	955	3	314	340	450	114	52	72	45.614	202	1.25e-16	hypothetical protein VITISV_043672 [Vitis vinifera]
comp1431_c0	1123	359491569	XP_002280533.2	2234	10	1122	8	378	379	109	176	28.7599	398	4.45e-39	PREDICTED: uncharacterized protein LOC100266246 [Vitis vinifera]
comp1444_c1	258	125544000	EAY90139.1	254	17	235	119	198	80	46	54	57.5	148	1.38e-10	hypothetical protein OsI_11705 [Oryza sativa Indica Group]
comp1446_c0	690	297740516	CBI30698.3	375	2	181	289	348	60	51	54	85	258	1.43e-23	unnamed protein product [Vitis vinifera]
comp1468_c0	862	12322008	AAG51046.1	1499	455	721	1263	1351	89	37	60	41.573	214	1.95e-33	gypsy/Ty-3 retroelement polyprotein; 69905-74404 [Arabidopsis thaliana] >gi|10998138|dbj|BAB03109.1| retroelement pol polyprotein [Arabidopsis thaliana]
comp1472_c0	487	357114599	XP_003559086.1	270	166	483	144	249	106	45	65	42.4528	245	7.17e-23	PREDICTED: uncharacterized protein LOC100837010 [Brachypodium distachyon]
comp1477_c0	745	224062387	XP_002300826.1	547	528	743	1	73	73	54	60	73.9726	262	2.75e-23	predicted protein [Populus trichocarpa] >gi|222842552|gb|EEE80099.1| predicted protein [Populus trichocarpa]
comp1478_c0	318	356528072	XP_003532629.1	647	3	314	39	142	104	64	83	61.5385	301	2.94e-30	PREDICTED: pentatricopeptide repeat-containing protein At1g62260, mitochondrial-like [Glycine max]
comp1483_c0	563	170093976	XP_001878209.1	501	1	561	209	395	187	153	172	81.8182	856	1.61e-110	predicted protein [Laccaria bicolor S238N-H82] >gi|164646663|gb|EDR10908.1| predicted protein [Laccaria bicolor S238N-H82]
comp1489_c0	515	357481373	XP_003610972.1	481	1	213	24	94	71	42	52	59.1549	224	4.16e-19	GRAS family transcription factor [Medicago truncatula] >gi|355512307|gb|AES93930.1| GRAS family transcription factor [Medicago truncatula]
comp1489_c1	214	224072841	XP_002303907.1	476	2	214	83	154	72	41	56	56.9444	219	7.99e-20	GRAS family transcription factor [Populus trichocarpa] >gi|222841339|gb|EEE78886.1| GRAS family transcription factor [Populus trichocarpa]
comp1497_c0	268	12331298	CAC24711.1	502	19	246	161	233	76	30	46	39.4737	144	2.35e-09	cytochrome P450 [Solanum tuberosum]
comp1515_c0	365	356526268	XP_003531740.1	403	3	362	281	400	120	68	83	56.6667	373	6.98e-41	PREDICTED: uncharacterized protein LOC100802670 [Glycine max]
comp1517_c0	224	378734642	EHY61101.1	498	2	223	113	184	74	49	61	66.2162	238	1.92e-22	pyruvate dehydrogenase E2 component (dihydrolipoamide acetyltransferase) [Exophiala dermatitidis NIH/UT8656]
comp1526_c0	802	224157214	XP_002337817.1	175	145	531	19	152	134	62	75	46.2687	262	5.96e-25	predicted protein [Populus trichocarpa] >gi|222869854|gb|EEF06985.1| predicted protein [Populus trichocarpa]
comp1528_c0	240	255573671	XP_002527757.1	1032	48	239	416	479	64	46	54	71.875	257	2.12e-24	Importin-7, putative [Ricinus communis] >gi|223532844|gb|EEF34618.1| Importin-7, putative [Ricinus communis]
comp1530_c0	604	147843231	CAN80549.1	801	346	468	479	519	41	23	34	56.0976	136	1.43e-14	hypothetical protein VITISV_019389 [Vitis vinifera]
comp1544_c0	206	242068721	XP_002449637.1	573	12	203	303	367	65	26	39	40	128	1.88e-07	hypothetical protein SORBIDRAFT_05g020510 [Sorghum bicolor] >gi|241935480|gb|EES08625.1| hypothetical protein SORBIDRAFT_05g020510 [Sorghum bicolor]
comp1554_c0	509	225426010	XP_002273198.1	505	14	466	9	163	159	83	107	52.2013	146	6.37e-09	PREDICTED: high mobility group B protein 13-like [Vitis vinifera]
comp1561_c0	615	162464220	NP_001106065.1	768	3	551	11	193	183	145	166	79.235	831	1.43e-103	DNA replication licensing factor MCM3 homolog 1 [Zea mays] >gi|148887401|sp|Q43704.2|MCM31_MAIZE RecName: Full=DNA replication licensing factor MCM3 homolog 1; AltName: Full=Replication origin activator 1; Short=ROA-1 >gi|114049619|emb|CAA82556.2| ROA protein [Zea mays]
comp1569_c0	555	346703228	CBX25327.1	371	2	181	112	171	60	47	51	78.3333	250	6.46e-23	hypothetical_protein [Oryza brachyantha]
comp1574_c0	573	224100341	XP_002311838.1	339	3	428	52	200	152	98	111	64.4737	504	1.29e-59	predicted protein [Populus trichocarpa] >gi|222851658|gb|EEE89205.1| predicted protein [Populus trichocarpa]
comp1576_c0	292	115443655	NP_001045607.1	192	3	266	1	88	88	52	69	59.0909	270	4.89e-28	Os02g0103700 [Oryza sativa Japonica Group] >gi|113535138|dbj|BAF07521.1| Os02g0103700 [Oryza sativa Japonica Group] >gi|215692923|dbj|BAG88343.1| unnamed protein product [Oryza sativa Japonica Group] >gi|215717068|dbj|BAG95431.1| unnamed protein product [Oryza sativa Japonica Group]
comp1595_c0	635	147774669	CAN67705.1	816	3	635	342	554	214	113	148	52.8037	509	4.22e-57	hypothetical protein VITISV_022431 [Vitis vinifera]
comp1614_c0	860	32487309	CAE05800.1	200	631	858	121	193	76	33	47	43.4211	163	3.35e-11	OSJNBb0046K02.10 [Oryza sativa Japonica Group]
comp1622_c0	281	4235644	AAD13304.1	1542	3	272	962	1051	90	64	76	71.1111	355	4.13e-37	polyprotein [Solanum lycopersicum]
comp1633_c0	576	170097091	XP_001879765.1	1326	197	559	44	165	122	56	73	45.9016	227	7.86e-19	predicted protein [Laccaria bicolor S238N-H82] >gi|164645168|gb|EDR09416.1| predicted protein [Laccaria bicolor S238N-H82]
comp1661_c0	723	32394730	AAM96001.1	306	14	676	86	306	221	194	208	87.7828	1067	3.47e-144	cathepsin L precursor [Metapenaeus ensis]
comp1673_c0	402	117553504	ABK35281.1	241	1	402	13	146	134	123	127	91.791	644	7.36e-83	MADS-box transcription factor AGL6a [Crocus sativus]
comp1678_c0	976	225435612	XP_002283306.1	1148	63	704	658	872	215	127	165	59.0698	680	4.41e-78	PREDICTED: putative E3 ubiquitin-protein ligase LIN-1-like [Vitis vinifera]
comp1682_c0	647	359491192	XP_003634238.1	571	60	647	239	432	196	73	120	37.2449	337	5.69e-34	PREDICTED: LOW QUALITY PROTEIN: cytochrome P450 71A4-like [Vitis vinifera]
comp1692_c0	732	115468584	NP_001057891.1	652	1	618	434	636	206	139	168	67.4757	768	1.17e-94	Os06g0565900 [Oryza sativa Japonica Group] >gi|113595931|dbj|BAF19805.1| Os06g0565900 [Oryza sativa Japonica Group]
comp1695_c0	769	326367387	ADZ55305.1	763	2	625	556	758	208	91	124	43.75	405	3.77e-42	serine protease [Coffea arabica]
comp1703_c0	434	357150024	XP_003575314.1	229	92	433	1	113	123	54	68	43.9024	191	1.01e-15	PREDICTED: uncharacterized protein LOC100840451 [Brachypodium distachyon]
comp1718_c0	309	321253886	XP_003192886.1	503	2	274	413	503	91	84	88	92.3077	444	9.56e-51	UTP-glucose-1-phosphate uridylyltransferase [Cryptococcus gattii WM276] >gi|317459355|gb|ADV21099.1| UTP-glucose-1-phosphate uridylyltransferase, putative [Cryptococcus gattii WM276]
comp1728_c0	312	255571533	XP_002526713.1	496	1	285	183	277	95	54	72	56.8421	292	1.66e-29	conserved hypothetical protein [Ricinus communis] >gi|223533946|gb|EEF35670.1| conserved hypothetical protein [Ricinus communis]
comp1730_c0	286	58268942	XP_571627.1	339	89	286	270	335	66	59	64	89.3939	323	1.66e-34	glyceraldehyde-3-phosphate dehydrogenase [Cryptococcus neoformans var. neoformans JEC21] >gi|134112916|ref|XP_775001.1| hypothetical protein CNBF1640 [Cryptococcus neoformans var. neoformans B-3501A] >gi|338818147|sp|P0CN74.1|G3P_CRYNJ RecName: Full=Glyceraldehyde-3-phosphate dehydrogenase; Short=GAPDH >gi|338818148|sp|P0CN75.1|G3P_CRYNB RecName: Full=Glyceraldehyde-3-phosphate dehydrogenase; Sho…
comp1744_c0	321	392576826	EIW69956.1	357	66	320	187	274	88	65	73	73.8636	315	4.12e-33	hypothetical protein TREMEDRAFT_56758 [Tremella mesenterica DSM 1558]
comp1764_c0	225	58269548	XP_571930.1	492	3	224	281	354	74	64	68	86.4865	363	7.64e-40	hypothetical protein [Cryptococcus neoformans var. neoformans JEC21] >gi|134113961|ref|XP_774228.1| hypothetical protein CNBG2100 [Cryptococcus neoformans var. neoformans B-3501A] >gi|50256863|gb|EAL19581.1| hypothetical protein CNBG2100 [Cryptococcus neoformans var. neoformans B-3501A] >gi|57228166|gb|AAW44623.1| conserved hypothetical protein [Cryptococcus neoformans var. neoformans JEC21]
comp1778_c0	800	357136823	XP_003570003.1	501	3	470	341	497	157	110	131	70.0637	555	1.94e-64	PREDICTED: putative glycerol-3-phosphate transporter 4-like [Brachypodium distachyon]
comp1786_c0	305	326529665	BAK04779.1	373	15	167	272	322	51	33	38	64.7059	140	7.57e-09	predicted protein [Hordeum vulgare subsp. vulgare] >gi|326531786|dbj|BAJ97897.1| predicted protein [Hordeum vulgare subsp. vulgare]
comp1787_c0	1455	357123298	XP_003563348.1	466	529	1188	93	309	220	166	191	75.4545	851	1.54e-105	PREDICTED: AP2-like ethylene-responsive transcription factor AIL5-like [Brachypodium distachyon]
comp1788_c0	251	392574767	EIW67902.1	130	1	207	62	130	69	67	68	97.1014	358	4.61e-42	hypothetical protein TREMEDRAFT_74347 [Tremella mesenterica DSM 1558]
comp1826_c0	273	242085388	XP_002443119.1	1595	7	273	1426	1514	89	42	55	47.191	221	2.85e-19	hypothetical protein SORBIDRAFT_08g009520 [Sorghum bicolor] >gi|241943812|gb|EES16957.1| hypothetical protein SORBIDRAFT_08g009520 [Sorghum bicolor]
comp1829_c0	411	225016149	ACN78973.1	1042	2	409	404	540	140	56	86	40	231	5.31e-20	copia-type polyprotein [Glycine max] >gi|225016157|gb|ACN78980.1| copia-type polyprotein [Glycine max]
comp1843_c0	281	395334428	EJF66804.1	600	201	281	574	600	27	23	24	85.1852	127	6.21e-07	glycoside hydrolase family 16 protein [Dichomitus squalens LYAD-421 SS1]
comp1861_c0	807	359485880	XP_003633348.1	234	50	640	24	220	197	147	169	74.6193	770	8.67e-100	PREDICTED: thymidine kinase-like [Vitis vinifera]
comp1866_c0	222	357478237	XP_003609404.1	1121	2	217	117	188	72	43	53	59.7222	225	4.24e-20	Telomere-associated protein RIF1 [Medicago truncatula] >gi|355510459|gb|AES91601.1| Telomere-associated protein RIF1 [Medicago truncatula]
comp1873_c0	502	170660047	ACB28472.1	953	2	271	501	628	128	48	61	37.5	164	5.49e-11	polyprotein [Ananas comosus]
comp1878_c0	269	242051961	XP_002455126.1	596	1	249	353	435	83	58	72	69.8795	312	2.73e-32	hypothetical protein SORBIDRAFT_03g004760 [Sorghum bicolor] >gi|241927101|gb|EES00246.1| hypothetical protein SORBIDRAFT_03g004760 [Sorghum bicolor]
comp1883_c0	767	330926548	XP_003301508.1	363	35	766	56	302	247	190	212	76.9231	732	1.76e-92	hypothetical protein PTT_13028 [Pyrenophora teres f. teres 0-1] >gi|311323640|gb|EFQ90410.1| hypothetical protein PTT_13028 [Pyrenophora teres f. teres 0-1]
comp1884_c0	322	398411118	XP_003856903.1	217	136	321	156	217	62	60	62	96.7742	317	1.68e-34	60S ribosomal protein L1 [Mycosphaerella graminicola IPO323] >gi|339476788|gb|EGP91879.1| hypothetical protein MYCGRDRAFT_98880 [Mycosphaerella graminicola IPO323]
comp1902_c0	1270	255564292	XP_002523143.1	1162	34	1269	276	686	412	354	378	85.9223	1861	0	Cellulose synthase A catalytic subunit 3 [UDP-forming], putative [Ricinus communis] >gi|223537705|gb|EEF39328.1| Cellulose synthase A catalytic subunit 3 [UDP-forming], putative [Ricinus communis]
comp1917_c0	335	222622932	EEE57064.1	2127	2	334	105	215	111	80	96	72.0721	433	3.76e-47	hypothetical protein OsJ_06880 [Oryza sativa Japonica Group]
comp1921_c0	236	321262292	XP_003195865.1	551	1	234	140	217	78	76	77	97.4359	405	1.82e-45	phosphoenolpyruvate carboxykinase [Cryptococcus gattii WM276] >gi|317462339|gb|ADV24078.1| phosphoenolpyruvate carboxykinase, putative [Cryptococcus gattii WM276]
comp1948_c0	248	361127006	EHK98989.1	136	46	246	1	67	67	58	62	86.5672	257	7.04e-27	putative 60S ribosomal protein L26-2 [Glarea lozoyensis 74030]
comp1951_c0	424	225432684	XP_002282590.1	258	20	406	1	122	129	68	89	52.7132	324	1.45e-34	PREDICTED: late embryogenesis abundant protein D-34 [Vitis vinifera] >gi|297737059|emb|CBI26260.3| unnamed protein product [Vitis vinifera]
comp1952_c0	269	225432151	XP_002274846.1	1018	115	204	505	534	30	27	29	90	162	7.83e-17	PREDICTED: calmodulin-binding transcription activator 1 [Vitis vinifera] >gi|297736797|emb|CBI25998.3| unnamed protein product [Vitis vinifera]
comp1958_c0	298	58267540	XP_570926.1	279	95	298	212	279	68	64	67	94.1176	366	2.93e-41	ubiquinol-cytochrome c reductase iron-sulfur subunit, mitochondrial precursor [Cryptococcus neoformans var. neoformans JEC21] >gi|134111963|ref|XP_775517.1| hypothetical protein CNBE2310 [Cryptococcus neoformans var. neoformans B-3501A] >gi|50258176|gb|EAL20870.1| hypothetical protein CNBE2310 [Cryptococcus neoformans var. neoformans B-3501A] >gi|57227160|gb|AAW43619.1| ubiquinol-cytochrome c red…
comp1960_c0	214	29893611	AAP06865.1	470	1	177	6	64	59	30	46	50.8475	148	4.11e-10	hypothetical protein [Oryza sativa Japonica Group] >gi|29893677|gb|AAP06931.1| SR-rich pre-mRNA splicing activator [Oryza sativa Japonica Group] >gi|108707410|gb|ABF95205.1| expressed protein [Oryza sativa Japonica Group] >gi|125585743|gb|EAZ26407.1| hypothetical protein OsJ_10290 [Oryza sativa Japonica Group]
comp1965_c0	311	356565864	XP_003551156.1	783	2	307	409	509	103	67	79	65.0485	338	4.73e-35	PREDICTED: probable LRR receptor-like serine/threonine-protein kinase RLK-like [Glycine max]
comp1971_c0	505	1769898	CAA69272.1	623	37	501	106	260	155	101	127	65.1613	588	1.1e-69	lectin receptor kinase [Arabidopsis thaliana]
comp1987_c0	867	255574842	XP_002528328.1	533	1	864	125	350	293	121	153	41.2969	419	2.39e-44	conserved hypothetical protein [Ricinus communis] >gi|223532283|gb|EEF34086.1| conserved hypothetical protein [Ricinus communis]
comp1991_c0	336	15617438	BAB64937.1	988	3	335	171	254	111	61	74	54.955	309	8.61e-31	TdcA1-ORF1-ORF2 [Daucus carota]
comp2021_c0	213	398407131	XP_003855031.1	186	2	211	90	159	70	67	68	95.7143	367	6.09e-43	60S ribosomal protein L17 [Mycosphaerella graminicola IPO323] >gi|339474915|gb|EGP90007.1| hypothetical protein MYCGRDRAFT_103329 [Mycosphaerella graminicola IPO323]
comp2033_c0	222	58266628	XP_570470.1	632	48	221	552	609	58	37	44	63.7931	154	1.02e-10	peptide transporter [Cryptococcus neoformans var. neoformans JEC21] >gi|57226703|gb|AAW43163.1| peptide transporter, putative [Cryptococcus neoformans var. neoformans JEC21]
comp2044_c0	909	189196842	XP_001934759.1	698	2	907	337	620	320	113	146	35.3125	276	2.01e-24	hypothetical protein PTRG_04426 [Pyrenophora tritici-repentis Pt-1C-BFP] >gi|187980638|gb|EDU47264.1| hypothetical protein PTRG_04426 [Pyrenophora tritici-repentis Pt-1C-BFP]
comp2057_c0	1005	359491404	XP_002274414.2	922	2	961	119	441	327	143	208	43.7309	513	1.09e-55	PREDICTED: probable disease resistance RPP8-like protein 2-like [Vitis vinifera]
comp2059_c0	481	6009527	BAA84946.1	363	6	473	51	206	156	127	144	81.4103	705	5.18e-90	ACC synthase [Musa acuminata AAA Group]
comp2060_c0	292	58258893	XP_566859.1	415	1	291	101	197	97	80	91	82.4742	448	3.71e-52	acetyl-CoA C-acyltransferase [Cryptococcus neoformans var. neoformans JEC21] >gi|57222996|gb|AAW41040.1| acetyl-CoA C-acyltransferase, putative [Cryptococcus neoformans var. neoformans JEC21]
comp2072_c0	547	297599579	NP_001047397.2	528	1	543	59	237	181	94	127	51.9337	410	1.47e-44	Os02g0610000 [Oryza sativa Japonica Group] >gi|125582844|gb|EAZ23775.1| hypothetical protein OsJ_07483 [Oryza sativa Japonica Group] >gi|255671079|dbj|BAF09311.2| Os02g0610000 [Oryza sativa Japonica Group]
comp2073_c0	385	378733575	EHY60034.1	579	3	209	22	90	69	62	65	89.8551	334	8.41e-35	MFS transporter, PHS family, inorganic phosphate transporter [Exophiala dermatitidis NIH/UT8656]
comp2085_c0	293	87241572	ABD33430.1	155	3	293	6	102	97	71	81	73.1959	384	1.78e-45	Translation protein SH3-like [Medicago truncatula]
comp2121_c0	393	321262282	XP_003195860.1	355	15	392	1	126	126	99	110	78.5714	528	4.06e-64	voltage-gated potassium channel beta-2 subunit [Cryptococcus gattii WM276] >gi|317462334|gb|ADV24073.1| Voltage-gated potassium channel beta-2 subunit, putative [Cryptococcus gattii WM276]
comp2173_c0	497	357139976	XP_003571550.1	940	25	351	484	590	109	47	71	43.1193	221	2.09e-18	PREDICTED: receptor-like protein kinase 2-like [Brachypodium distachyon]
comp2177_c0	718	356499046	XP_003518355.1	678	208	429	446	567	122	39	53	31.9672	135	6.35e-07	PREDICTED: uncharacterized protein LOC100788934 [Glycine max]
comp2187_c0	578	90265171	CAH67739.1	156	33	476	1	153	163	71	96	43.5583	295	9.94e-31	H0522A01.10 [Oryza sativa Indica Group] >gi|116634833|emb|CAH67283.1| OSIGBa0103O01.1 [Oryza sativa Indica Group] >gi|125548865|gb|EAY94687.1| hypothetical protein OsI_16465 [Oryza sativa Indica Group]
comp2200_c0	815	224089879	XP_002308848.1	401	462	815	264	377	118	59	73	50	263	8.85e-24	predicted protein [Populus trichocarpa] >gi|222854824|gb|EEE92371.1| predicted protein [Populus trichocarpa]
comp2202_c0	232	357119424	XP_003561440.1	1335	2	148	316	366	51	28	40	54.902	156	6.64e-11	PREDICTED: uncharacterized protein LOC100823228 [Brachypodium distachyon]
comp2230_c0	328	255585305	XP_002533351.1	226	3	326	84	170	109	64	75	58.7156	322	3.37e-35	conserved hypothetical protein [Ricinus communis] >gi|223526816|gb|EEF29036.1| conserved hypothetical protein [Ricinus communis]
comp2245_c0	305	242050842	XP_002463165.1	314	37	282	231	312	82	57	68	69.5122	320	3.56e-34	hypothetical protein SORBIDRAFT_02g038910 [Sorghum bicolor] >gi|241926542|gb|EER99686.1| hypothetical protein SORBIDRAFT_02g038910 [Sorghum bicolor]
comp2256_c0	208	398411379	XP_003857029.1	392	2	208	312	380	69	65	68	94.2029	345	7.85e-38	60S ribosomal protein L3 [Mycosphaerella graminicola IPO323] >gi|339476914|gb|EGP92005.1| hypothetical protein MYCGRDRAFT_102848 [Mycosphaerella graminicola IPO323]
comp2264_c0	514	10732644	AAG22488.1	575	2	514	50	220	171	146	156	85.3801	648	7.06e-79	pyruvate decarboxylase 1 [Vitis vinifera]
comp2309_c0	1141	297607820	NP_001060683.2	914	239	1072	60	305	282	88	129	31.2057	205	5.45e-15	Os07g0686400 [Oryza sativa Japonica Group] >gi|222637713|gb|EEE67845.1| hypothetical protein OsJ_25635 [Oryza sativa Japonica Group] >gi|255678070|dbj|BAF22597.2| Os07g0686400 [Oryza sativa Japonica Group]
comp2319_c0	289	302904848	XP_003049149.1	664	1	285	158	252	95	58	75	61.0526	339	1e-35	hypothetical protein NECHADRAFT_45195 [Nectria haematococca mpVI 77-13-4] >gi|256730084|gb|EEU43436.1| hypothetical protein NECHADRAFT_45195 [Nectria haematococca mpVI 77-13-4]
comp2334_c0	397	398406152	XP_003854542.1	743	15	332	507	621	117	62	73	52.9915	273	6.77e-26	hypothetical protein MYCGRDRAFT_69513 [Mycosphaerella graminicola IPO323] >gi|339474425|gb|EGP89518.1| hypothetical protein MYCGRDRAFT_69513 [Mycosphaerella graminicola IPO323]
comp2347_c0	211	296088987	CBI38690.3	333	64	210	228	273	49	37	42	75.5102	186	1.04e-15	unnamed protein product [Vitis vinifera]
comp2352_c0	464	38344889	CAD41912.2	1181	16	201	1028	1089	62	35	45	56.4516	173	3.24e-12	OSJNBa0033G05.13 [Oryza sativa Japonica Group]
comp2362_c0	467	392580193	EIW73320.1	322	3	83	84	110	27	25	27	92.5926	135	1.08e-07	hypothetical protein TREMEDRAFT_73043 [Tremella mesenterica DSM 1558]
comp2369_c0	258	147800172	CAN62143.1	501	1	258	59	144	86	65	74	75.5814	291	1.24e-29	hypothetical protein VITISV_023956 [Vitis vinifera]
comp2371_c0	258	13559346	BAB40833.1	143	1	255	46	130	85	54	67	63.5294	298	9.02e-33	reverse transcriptase [Spinacia oleracea]
comp2382_c0	366	359484996	XP_002273742.2	297	2	319	4	100	106	69	80	65.0943	334	4.25e-36	PREDICTED: probable xyloglucan endotransglucosylase/hydrolase protein 23-like [Vitis vinifera]
comp2398_c0	242	356521092	XP_003529192.1	617	66	173	1	36	36	27	29	75	134	4.94e-08	PREDICTED: pyrophosphate--fructose 6-phosphate 1-phosphotransferase subunit alpha-like [Glycine max]
comp2420_c0	471	224085435	XP_002335284.1	164	94	471	31	162	133	64	83	48.1203	319	1.24e-34	predicted protein [Populus trichocarpa] >gi|222833219|gb|EEE71696.1| predicted protein [Populus trichocarpa]
comp2431_c0	1494	225433700	XP_002266204.1	434	202	1380	42	434	393	284	335	72.2646	1336	8.07e-179	PREDICTED: vacuolar amino acid transporter 1 [Vitis vinifera] >gi|296089627|emb|CBI39446.3| unnamed protein product [Vitis vinifera]
comp2463_c0	289	218188326	EEC70753.1	954	1	288	193	288	96	86	91	89.5833	454	5.82e-51	hypothetical protein OsI_02166 [Oryza sativa Indica Group]
comp2466_c0	318	359489546	XP_003633934.1	259	32	253	1	77	77	56	70	72.7273	303	4.88e-32	PREDICTED: SPX domain-containing protein 3-like [Vitis vinifera] >gi|296089210|emb|CBI38913.3| unnamed protein product [Vitis vinifera]
comp2478_c0	418	255578383	XP_002530058.1	504	19	417	44	175	133	74	98	55.6391	383	1.47e-41	cytochrome P450, putative [Ricinus communis] >gi|223530474|gb|EEF32358.1| cytochrome P450, putative [Ricinus communis]
comp2480_c0	254	115434040	NP_001041778.1	2905	160	252	2167	2197	31	24	27	77.4194	127	2.04e-09	Os01g0106700 [Oryza sativa Japonica Group] >gi|113531309|dbj|BAF03692.1| Os01g0106700 [Oryza sativa Japonica Group]
comp2493_c0	277	321259954	XP_003194697.1	257	5	238	11	94	84	47	61	55.9524	261	3.7e-26	hypothetical protein CGB_F2380W [Cryptococcus gattii WM276] >gi|317461169|gb|ADV22910.1| conserved hypothetical protein [Cryptococcus gattii WM276]
comp2498_c0	1052	225426710	XP_002275471.1	755	5	1027	23	368	352	194	247	55.1136	967	1.75e-121	PREDICTED: subtilisin-like protease SDD1-like [Vitis vinifera]
comp2518_c0	272	398398249	XP_003852582.1	632	48	272	424	498	75	64	71	85.3333	289	6.6e-29	hypothetical protein MYCGRDRAFT_72261 [Mycosphaerella graminicola IPO323] >gi|339472463|gb|EGP87558.1| hypothetical protein MYCGRDRAFT_72261 [Mycosphaerella graminicola IPO323]
comp2527_c0	497	392577519	EIW70648.1	357	1	243	41	121	81	72	77	88.8889	329	2.99e-34	hypothetical protein TREMEDRAFT_71348 [Tremella mesenterica DSM 1558]
comp2528_c0	439	398395946	XP_003851431.1	173	165	437	58	148	91	54	69	59.3407	309	3.77e-33	hypothetical protein MYCGRDRAFT_104795 [Mycosphaerella graminicola IPO323] >gi|339471311|gb|EGP86407.1| hypothetical protein MYCGRDRAFT_104795 [Mycosphaerella graminicola IPO323]
comp2554_c0	228	29150404	AAO72413.1	1339	1	225	415	490	76	48	60	63.1579	270	5.11e-26	gag-pol polyprotein [Oryza sativa Japonica Group] >gi|108710383|gb|ABF98178.1| retrotransposon protein, putative, unclassified [Oryza sativa Japonica Group]
comp2611_c0	321	225461064	XP_002279003.1	185	8	217	104	184	81	37	49	45.679	151	6.41e-11	PREDICTED: uncharacterized protein LOC100258838 [Vitis vinifera]
comp2615_c0	309	321258548	XP_003193995.1	499	1	207	430	499	70	56	64	80	293	1.05e-29	glycine hydroxymethyltransferase [Cryptococcus gattii WM276] >gi|317460465|gb|ADV22208.1| glycine hydroxymethyltransferase, putative [Cryptococcus gattii WM276]
comp2631_c0	296	10334848	AAG15418.1	168	30	137	1	36	36	27	29	75	122	4.24e-07	seed maturation protein [Glycine tomentella]
comp2664_c0	518	357490387	XP_003615481.1	254	3	383	96	231	136	86	95	63.2353	411	4.88e-47	hypothetical protein MTR_5g068640 [Medicago truncatula] >gi|355516816|gb|AES98439.1| hypothetical protein MTR_5g068640 [Medicago truncatula]
comp2669_c0	377	356514573	XP_003525980.1	920	1	375	294	418	125	82	97	65.6	444	4.51e-49	PREDICTED: uncharacterized protein LOC100792198 [Glycine max]
comp2685_c0	616	147835199	CAN76752.1	154	82	513	5	148	144	93	113	64.5833	497	1.13e-60	hypothetical protein VITISV_009422 [Vitis vinifera]
comp2695_c0	230	156099618	ABU48816.1	289	3	230	91	166	76	68	72	89.4737	362	6.22e-41	translation elongation factor 1-alpha, partial [Wickerhamomyces subpelliculosa]
comp2713_c0	1078	225453975	XP_002280334.1	210	176	832	2	210	224	156	183	69.6429	707	2.63e-89	PREDICTED: axial regulator YABBY 1 [Vitis vinifera] >gi|296089181|emb|CBI38884.3| unnamed protein product [Vitis vinifera]
comp2717_c0	434	115449761	NP_001048546.1	266	1	219	34	106	73	54	62	73.9726	226	1.71e-20	Os02g0820800 [Oryza sativa Japonica Group] >gi|48716263|dbj|BAD22878.1| DNA-binding protein-like [Oryza sativa Japonica Group] >gi|48716505|dbj|BAD23110.1| DNA-binding protein-like [Oryza sativa Japonica Group] >gi|113538077|dbj|BAF10460.1| Os02g0820800 [Oryza sativa Japonica Group] >gi|125541659|gb|EAY88054.1| hypothetical protein OsI_09483 [Oryza sativa Indica Group]
comp2723_c0	554	255577191	XP_002529478.1	446	228	554	129	247	119	40	60	33.6134	140	5.23e-08	protein with unknown function [Ricinus communis] >gi|223531036|gb|EEF32888.1| protein with unknown function [Ricinus communis]
comp2727_c0	349	169613212	XP_001800023.1	295	1	336	179	293	116	57	68	49.1379	214	3.93e-19	hypothetical protein SNOG_09736 [Phaeosphaeria nodorum SN15] >gi|111061881|gb|EAT83001.1| hypothetical protein SNOG_09736 [Phaeosphaeria nodorum SN15]
comp2743_c0	540	218191255	EEC73682.1	1706	3	536	232	409	180	55	89	30.5556	196	6.8e-15	hypothetical protein OsI_08243 [Oryza sativa Indica Group]
comp2746_c0	280	226491458	NP_001143083.1	577	194	280	549	577	29	26	28	89.6552	144	3.19e-09	uncharacterized protein LOC100275557 [Zea mays] >gi|195613998|gb|ACG28829.1| hypothetical protein [Zea mays]
comp2758_c0	613	359480061	XP_002269766.2	804	7	600	62	266	205	121	159	59.0244	632	2.23e-74	PREDICTED: subtilisin-like protease SDD1-like [Vitis vinifera]
comp2776_c0	257	321258598	XP_003194020.1	691	1	255	587	671	85	69	77	81.1765	396	8.49e-44	peroxisomal copper amine oxidase (Methylamine oxidase) [Cryptococcus gattii WM276] >gi|317460490|gb|ADV22233.1| Peroxisomal copper amine oxidase (Methylamine oxidase), putative [Cryptococcus gattii WM276]
comp2796_c0	432	298283461	ADI72850.1	215	1	432	45	188	144	131	136	90.9722	594	1.6e-75	phosphate:H+ symporter, partial [Ophiocordyceps unilateralis]
comp2869_c0	542	58258845	XP_566835.1	441	367	540	168	223	58	42	47	72.4138	151	1.81e-09	single-stranded DNA binding protein [Cryptococcus neoformans var. neoformans JEC21] >gi|57222972|gb|AAW41016.1| single-stranded DNA binding protein, putative [Cryptococcus neoformans var. neoformans JEC21]
comp2886_c0	295	78103323	YP_358637.1	131	2	196	32	96	65	46	48	70.7692	211	6.86e-27	hypothetical protein PhapfoPp091 [Phalaenopsis aphrodite subsp. formosana] >gi|58802853|gb|AAW82573.1| hypothetical protein [Phalaenopsis aphrodite subsp. formosana]
comp2894_c0	906	255580114	XP_002530889.1	1876	122	505	831	962	135	77	94	57.037	389	9.78e-39	conserved hypothetical protein [Ricinus communis] >gi|223529542|gb|EEF31495.1| conserved hypothetical protein [Ricinus communis]
comp2906_c0	486	307136461	ADN34266.1	676	1	468	137	297	163	84	111	51.5337	392	4.47e-42	putative kinase [Cucumis melo subsp. melo]
comp2910_c0	280	356568138	XP_003552270.1	497	5	280	381	479	100	41	57	41	165	4.91e-12	PREDICTED: nodulation-signaling pathway 2 protein-like [Glycine max]
comp2913_c0	672	326498035	BAJ94880.1	590	2	670	218	438	223	154	178	69.0583	789	8.14e-99	predicted protein [Hordeum vulgare subsp. vulgare]
comp2935_c0	411	225456159	XP_002278561.1	1038	26	409	148	275	128	64	87	50	289	8.39e-28	PREDICTED: probable LRR receptor-like serine/threonine-protein kinase At4g08850-like [Vitis vinifera]
comp2954_c0	1251	398391380	XP_003849150.1	883	822	1082	1	87	87	60	71	68.9655	288	3.57e-25	hypothetical protein MYCGRDRAFT_111014 [Mycosphaerella graminicola IPO323] >gi|339469026|gb|EGP84126.1| hypothetical protein MYCGRDRAFT_111014 [Mycosphaerella graminicola IPO323]
comp2955_c0	396	170098000	XP_001880219.1	271	10	396	6	134	129	106	122	82.1705	579	9.91e-73	predicted protein [Laccaria bicolor S238N-H82] >gi|164644657|gb|EDR08906.1| predicted protein [Laccaria bicolor S238N-H82]
comp2959_c0	470	398404442	XP_003853687.1	324	1	468	97	252	156	145	149	92.9487	723	3.08e-93	hypothetical protein MYCGRDRAFT_69399 [Mycosphaerella graminicola IPO323] >gi|339473570|gb|EGP88663.1| hypothetical protein MYCGRDRAFT_69399 [Mycosphaerella graminicola IPO323]
comp2969_c0	329	147789988	CAN71759.1	1472	3	206	1136	1208	73	35	48	47.9452	185	5.47e-19	hypothetical protein VITISV_020777 [Vitis vinifera]
comp2980_c0	1023	115468004	NP_001057601.1	299	152	907	39	292	254	152	193	59.8425	809	1.18e-103	Os06g0358800 [Oryza sativa Japonica Group] >gi|75254269|sp|Q69KJ0.1|RTL3_ORYSJ RecName: Full=Ribonuclease 3-like protein 3; AltName: Full=Ribonuclease III-like protein 3; Short=RNase III-like protein 3 >gi|51091751|dbj|BAD36550.1| CAF protein-like [Oryza sativa Japonica Group] >gi|113595641|dbj|BAF19515.1| Os06g0358800 [Oryza sativa Japonica Group] >gi|125597181|gb|EAZ36961.1| hypothetical protei…
comp2999_c0	310	224139824	XP_002323294.1	511	9	305	164	258	99	60	78	60.6061	317	5.03e-33	cytochrome P450 [Populus trichocarpa] >gi|222867924|gb|EEF05055.1| cytochrome P450 [Populus trichocarpa]
comp3003_c0	408	147772361	CAN75711.1	257	2	406	113	247	135	93	110	68.8889	455	3.95e-54	hypothetical protein VITISV_026859 [Vitis vinifera]
comp3012_c0	1827	255559426	XP_002520733.1	800	9	1775	157	723	589	338	425	57.3854	1812	0	Ent-kaurene synthase A, chloroplast precursor, putative [Ricinus communis] >gi|223540118|gb|EEF41695.1| Ent-kaurene synthase A, chloroplast precursor, putative [Ricinus communis]
comp3037_c0	920	225433716	XP_002268575.1	533	176	919	39	287	250	137	183	54.8	702	3.8e-85	PREDICTED: signal peptide peptidase-like 2B [Vitis vinifera] >gi|296089635|emb|CBI39454.3| unnamed protein product [Vitis vinifera]
comp3044_c0	379	147798886	CAN74964.1	1248	5	325	353	459	107	90	98	84.1121	490	5.67e-55	hypothetical protein VITISV_006810 [Vitis vinifera]
comp3069_c0	427	317106662	BAJ53166.1	927	55	426	770	899	131	69	91	52.6718	333	1.07e-33	JHL10I11.12 [Jatropha curcas]
comp3086_c0	286	297738361	CBI27562.3	688	4	285	389	482	94	63	76	67.0213	332	1.28e-34	unnamed protein product [Vitis vinifera]
comp3090_c0	528	147823114	CAN73022.1	767	1	528	63	233	178	113	122	63.4831	445	7.14e-49	hypothetical protein VITISV_004050 [Vitis vinifera]
comp3110_c0	747	255555553	XP_002518813.1	663	96	734	24	231	213	130	152	61.0329	559	5.72e-64	receptor-kinase, putative [Ricinus communis] >gi|223542194|gb|EEF43738.1| receptor-kinase, putative [Ricinus communis]
comp3118_c0	350	398397503	XP_003852209.1	1007	2	349	188	304	117	98	108	83.7607	496	3.12e-56	H(+)-exporting P2-type ATPase [Mycosphaerella graminicola IPO323] >gi|339472090|gb|EGP87185.1| hypothetical protein MYCGRDRAFT_59052 [Mycosphaerella graminicola IPO323]
comp3137_c0	617	297735205	CBI17567.3	517	200	382	259	319	61	46	53	75.4098	242	6.66e-41	unnamed protein product [Vitis vinifera]
comp3158_c0	218	154305146	XP_001552976.1	586	2	217	309	380	72	48	63	66.6667	283	2.07e-28	hypothetical protein BC1G_08663 [Botryotinia fuckeliana B05.10] >gi|150853826|gb|EDN29018.1| hypothetical protein BC1G_08663 [Botryotinia fuckeliana B05.10] >gi|347838753|emb|CCD53325.1| similar to inorganic phosphate transporter [Botryotinia fuckeliana]
comp3176_c0	209	219887699	ACL54224.1	298	1	207	155	225	71	43	53	60.5634	204	1.88e-18	unknown [Zea mays]
comp3180_c0	223	58268320	XP_571316.1	2237	4	222	49	121	73	72	73	98.6301	383	3.95e-41	acetyl-CoA carboxylase [Cryptococcus neoformans var. neoformans JEC21] >gi|57227551|gb|AAW44009.1| acetyl-CoA carboxylase, putative [Cryptococcus neoformans var. neoformans JEC21]
comp3192_c0	740	15451607	AAK98731.1	1461	321	671	727	837	117	64	77	54.7009	285	3.02e-47	Putative retroelement [Oryza sativa Japonica Group] >gi|108706172|gb|ABF93967.1| retrotransposon protein, putative, unclassified [Oryza sativa Japonica Group]
comp3203_c0	630	296090514	CBI40845.3	979	1	606	742	979	251	80	123	31.8725	206	6.08e-16	unnamed protein product [Vitis vinifera]
comp3241_c0	320	45935154	AAS79612.1	651	1	198	45	103	66	27	36	40.9091	122	3.12e-06	putative tnp2 transposase [Ipomoea trifida]
comp3258_c0	343	218191394	EEC73821.1	672	5	343	263	375	113	64	84	56.6372	337	5.48e-35	hypothetical protein OsI_08545 [Oryza sativa Indica Group]
comp3269_c0	480	302835147	XP_002949135.1	257	137	478	121	234	114	87	97	76.3158	457	4.1e-54	component of cytosolic 80S ribosome and 40S small subunit [Volvox carteri f. nagariensis] >gi|300265437|gb|EFJ49628.1| component of cytosolic 80S ribosome and 40S small subunit [Volvox carteri f. nagariensis]
comp3284_c0	498	11994222	BAB01344.1	1115	5	358	759	877	120	49	71	40.8333	265	4.61e-24	reverse transcriptase-like protein [Arabidopsis thaliana]
comp3292_c0	448	218187919	EEC70346.1	1346	5	448	500	647	148	98	122	66.2162	528	1.31e-59	hypothetical protein OsI_01252 [Oryza sativa Indica Group]
comp3319_c0	552	356498290	XP_003517986.1	1267	103	537	788	932	145	83	102	57.2414	415	7.32e-44	PREDICTED: uncharacterized protein LOC100819936 [Glycine max]
comp3348_c0	646	218196882	EEC79309.1	1873	19	375	804	920	124	46	64	37.0968	179	1.56e-12	hypothetical protein OsI_20143 [Oryza sativa Indica Group]
comp3349_c0	461	339782128	AEK07905.1	666	2	268	86	174	89	43	66	48.3146	229	8.84e-20	pectin methylesterase [Allium cepa]
comp3354_c0	393	359496850	XP_003635354.1	2807	162	320	1270	1322	53	23	33	43.3962	136	2.32e-13	PREDICTED: uncharacterized protein LOC100854728 [Vitis vinifera]
comp3388_c0	481	242059045	XP_002458668.1	524	1	453	343	497	155	121	136	78.0645	664	5.12e-82	hypothetical protein SORBIDRAFT_03g037815 [Sorghum bicolor] >gi|241930643|gb|EES03788.1| hypothetical protein SORBIDRAFT_03g037815 [Sorghum bicolor]
comp3413_c0	301	321250603	XP_003191863.1	464	4	300	334	432	99	97	98	97.9798	518	6.09e-62	citrate synthase [Cryptococcus gattii WM276] >gi|317458331|gb|ADV20076.1| Citrate synthase, putative [Cryptococcus gattii WM276]
comp3429_c0	494	33337565	AAQ13435.1	463	33	494	4	157	154	121	137	78.5714	690	2.03e-86	1-aminocyclopropane-1-carboxylate synthase [Musa acuminata AAA Group]
comp3432_c0	229	377552530	AFB69855.1	180	1	228	104	179	76	47	61	61.8421	213	5.33e-20	polyprotein, partial [Ananas comosus]
comp3448_c0	1121	156065707	XP_001598775.1	573	4	1119	106	484	379	298	328	78.628	1327	2.31e-177	hypothetical protein SS1G_00864 [Sclerotinia sclerotiorum 1980] >gi|154691723|gb|EDN91461.1| hypothetical protein SS1G_00864 [Sclerotinia sclerotiorum 1980 UF-70]
comp3459_c0	375	255574426	XP_002528126.1	1050	99	293	839	903	65	41	52	63.0769	213	7.82e-18	hypothetical protein RCOM_0146510 [Ricinus communis] >gi|223532465|gb|EEF34256.1| hypothetical protein RCOM_0146510 [Ricinus communis]
comp3482_c0	386	326533474	BAK05268.1	418	50	304	42	131	90	46	61	51.1111	225	4.56e-20	predicted protein [Hordeum vulgare subsp. vulgare]
comp3511_c0	606	147857914	CAN82526.1	1125	117	557	744	890	147	72	93	48.9796	321	4.77e-31	hypothetical protein VITISV_028058 [Vitis vinifera]
comp3525_c0	404	58269032	XP_571672.1	629	1	402	172	305	134	111	124	82.8358	625	1.15e-75	malate dehydrogenase [Cryptococcus neoformans var. neoformans JEC21] >gi|134112792|ref|XP_774939.1| hypothetical protein CNBF1040 [Cryptococcus neoformans var. neoformans B-3501A] >gi|50257587|gb|EAL20292.1| hypothetical protein CNBF1040 [Cryptococcus neoformans var. neoformans B-3501A] >gi|57227907|gb|AAW44365.1| malate dehydrogenase, putative [Cryptococcus neoformans var. neoformans JEC21]
comp3550_c0	1110	242062492	XP_002452535.1	330	2	922	2	321	321	213	252	66.3551	974	1.39e-127	hypothetical protein SORBIDRAFT_04g027540 [Sorghum bicolor] >gi|241932366|gb|EES05511.1| hypothetical protein SORBIDRAFT_04g027540 [Sorghum bicolor]
comp3560_c0	342	108863938	ABA91239.2	224	4	129	77	118	42	24	30	57.1429	133	3.31e-08	WRKY DNA binding domain containing protein, expressed [Oryza sativa Japonica Group] >gi|218185120|gb|EEC67547.1| hypothetical protein OsI_34877 [Oryza sativa Indica Group] >gi|222615398|gb|EEE51530.1| hypothetical protein OsJ_32730 [Oryza sativa Japonica Group]
comp3567_c0	359	242040887	XP_002467838.1	261	3	251	50	132	83	67	75	80.7229	366	3.37e-41	hypothetical protein SORBIDRAFT_01g034993 [Sorghum bicolor] >gi|241921692|gb|EER94836.1| hypothetical protein SORBIDRAFT_01g034993 [Sorghum bicolor]
comp3578_c0	582	224105193	XP_002333850.1	316	2	319	209	312	106	70	79	66.0377	328	5.5e-34	predicted protein [Populus trichocarpa] >gi|222838696|gb|EEE77061.1| predicted protein [Populus trichocarpa]
comp3580_c0	243	108863054	ABG22118.1	351	1	201	173	231	67	30	45	44.7761	144	1.48e-09	polyprotein [Hydrangea macrophylla]
comp3601_c0	410	297736573	CBI25444.3	477	1	408	15	150	136	97	115	71.3235	541	1.45e-64	unnamed protein product [Vitis vinifera]
comp3603_c0	306	255584892	XP_002533161.1	295	51	251	32	100	69	41	54	59.4203	194	1.4e-16	casein kinase II, alpha chain, putative [Ricinus communis] >gi|223527033|gb|EEF29220.1| casein kinase II, alpha chain, putative [Ricinus communis]
comp3626_c0	216	326502344	BAJ95235.1	319	1	216	99	170	72	65	67	90.2778	338	2.75e-37	predicted protein [Hordeum vulgare subsp. vulgare]
comp3628_c0	256	58270262	XP_572287.1	592	2	256	422	506	85	79	81	92.9412	432	5.27e-49	asparagine synthase (glutamine-hydrolyzing) [Cryptococcus neoformans var. neoformans JEC21] >gi|134117676|ref|XP_772472.1| hypothetical protein CNBL0870 [Cryptococcus neoformans var. neoformans B-3501A] >gi|50255086|gb|EAL17825.1| hypothetical protein CNBL0870 [Cryptococcus neoformans var. neoformans B-3501A] >gi|57228545|gb|AAW44980.1| asparagine synthase (glutamine-hydrolyzing), putative [Crypt…
comp3657_c0	720	326496276	BAJ94600.1	419	96	713	24	246	235	99	122	42.1277	249	4.05e-22	predicted protein [Hordeum vulgare subsp. vulgare] >gi|326517693|dbj|BAK03765.1| predicted protein [Hordeum vulgare subsp. vulgare]
comp3689_c0	257	336375773	EGO04109.1	285	5	256	193	276	84	67	77	79.7619	374	1.38e-42	hypothetical protein SERLA73DRAFT_175870 [Serpula lacrymans var. lacrymans S7.3]
comp3701_c0	480	255576629	XP_002529204.1	1079	4	474	253	410	159	97	119	61.0063	399	3.47e-42	serine/threonine-protein kinase bri1, putative [Ricinus communis] >gi|223531322|gb|EEF33160.1| serine/threonine-protein kinase bri1, putative [Ricinus communis]
comp3705_c0	281	388583223	EIM23525.1	304	109	279	248	304	57	46	52	80.7018	264	2.24e-26	hypothetical protein WALSEDRAFT_59246 [Wallemia sebi CBS 633.66]
comp3710_c0	332	357127545	XP_003565440.1	596	1	306	492	593	102	72	84	70.5882	401	3.37e-44	PREDICTED: uncharacterized protein LOC100830918 [Brachypodium distachyon]
comp3722_c0	999	21262152	CAD32690.1	1236	1	966	57	378	322	257	294	79.8137	1256	1.25e-159	SMC4 protein [Oryza sativa]
comp3734_c0	213	302759779	XP_002963312.1	100	7	213	11	79	69	35	52	50.7246	141	2.84e-10	hypothetical protein SELMODRAFT_80695 [Selaginella moellendorffii] >gi|300168580|gb|EFJ35183.1| hypothetical protein SELMODRAFT_80695 [Selaginella moellendorffii]
comp3748_c0	294	392576269	EIW69400.1	582	1	294	143	240	98	91	97	92.8571	472	1.78e-54	hypothetical protein TREMEDRAFT_39009 [Tremella mesenterica DSM 1558]
comp3808_c0	1067	297737352	CBI26553.3	1276	1	1014	215	554	340	185	235	54.4118	788	3.39e-92	unnamed protein product [Vitis vinifera]
comp3813_c0	466	4063770	BAA36225.1	808	3	392	154	283	130	87	107	66.9231	476	2.23e-53	transposase [Ipomoea purpurea]
comp3885_c0	546	357117651	XP_003560577.1	523	3	497	346	512	167	117	136	70.0599	638	9.27e-78	PREDICTED: cytochrome P450 93A1-like [Brachypodium distachyon]
comp3892_c0	270	322705046	EFY96635.1	606	2	268	499	587	89	71	80	79.7753	388	8.74e-43	oligopeptide transporter, putative [Metarhizium anisopliae ARSEF 23]
comp3894_c0	254	255546495	XP_002514307.1	410	1	252	48	131	84	57	71	67.8571	338	2.05e-36	monooxygenase, putative [Ricinus communis] >gi|223546763|gb|EEF48261.1| monooxygenase, putative [Ricinus communis]
comp3902_c0	1434	359476082	XP_002282025.2	340	644	1432	78	340	264	155	196	58.7121	837	2.75e-105	PREDICTED: uncharacterized protein LOC100257807 [Vitis vinifera] >gi|296081950|emb|CBI20955.3| unnamed protein product [Vitis vinifera]
comp3907_c0	589	147794019	CAN60112.1	653	2	589	102	297	197	171	181	86.802	863	1.32e-109	hypothetical protein VITISV_018380 [Vitis vinifera]
comp3913_c0	452	238006096	ACR34083.1	303	71	451	23	149	127	72	91	56.6929	353	2.81e-38	unknown [Zea mays]
comp3918_c0	444	342326436	AEL23133.1	176	42	437	16	147	132	88	109	66.6667	477	2.83e-58	60S ribosomal protein L13A [Cherax quadricarinatus]
comp3930_c0	213	392578173	EIW71301.1	133	105	212	81	116	36	30	33	83.3333	152	1.03e-11	hypothetical protein TREMEDRAFT_71126 [Tremella mesenterica DSM 1558]
comp3936_c0	315	15233733	NP_195532.1	1111	1	315	905	1009	105	87	102	82.8571	418	1.42e-45	cellulose synthase-like protein D4 [Arabidopsis thaliana] >gi|75213628|sp|Q9SZL9.1|CSLD4_ARATH RecName: Full=Cellulose synthase-like protein D4; Short=AtCslD4 >gi|4467125|emb|CAB37559.1| putative protein [Arabidopsis thaliana] >gi|7270803|emb|CAB80484.1| putative protein [Arabidopsis thaliana] >gi|332661491|gb|AEE86891.1| cellulose synthase-like protein D4 [Arabidopsis thaliana]
comp3948_c0	640	224064320	XP_002301421.1	415	3	596	214	410	199	96	133	48.2412	263	2.74e-24	predicted protein [Populus trichocarpa] >gi|222843147|gb|EEE80694.1| predicted protein [Populus trichocarpa]
comp3952_c0	269	45201357	NP_986927.1	67	38	190	3	53	51	47	49	92.1569	235	3.12e-24	AGR261Wp [Ashbya gossypii ATCC 10895] >gi|255712769|ref|XP_002552667.1| KLTH0C10296p [Lachancea thermotolerans] >gi|363750474|ref|XP_003645454.1| hypothetical protein Ecym_3133 [Eremothecium cymbalariae DBVPG#7215] >gi|51316720|sp|Q74ZD8.1|RS28_ASHGO RecName: Full=40S ribosomal protein S28 >gi|44986291|gb|AAS54751.1| AGR261Wp [Ashbya gossypii ATCC 10895] >gi|238934046|emb|CAR22229.1| KLTH0C10296p…
comp3969_c0	705	222626119	EEE60251.1	974	3	692	181	407	230	87	140	37.8261	452	2.17e-48	hypothetical protein OsJ_13260 [Oryza sativa Japonica Group]
comp3974_c0	798	2935450	AAC05126.1	93	350	622	3	93	91	86	90	94.5055	454	3.82e-54	histone H2B [Malus x domestica]
comp3983_c0	1079	301154123	CBW30222.1	1066	1	1074	26	377	365	161	219	44.1096	687	1.19e-78	Disease resistance protein (CC-NBS-LRR) [Musa balbisiana]
comp3985_c0	324	392577574	EIW70703.1	707	1	324	61	167	108	81	91	75	432	2.67e-48	acetolactate synthase [Tremella mesenterica DSM 1558]
comp4002_c0	275	392573919	EIW67057.1	163	69	161	121	151	31	25	27	80.6452	125	1.27e-07	hypothetical protein TREMEDRAFT_45490 [Tremella mesenterica DSM 1558]
comp4005_c0	383	224141771	XP_002324238.1	556	2	382	86	212	127	88	102	69.2913	340	1.01e-35	predicted protein [Populus trichocarpa] >gi|222865672|gb|EEF02803.1| predicted protein [Populus trichocarpa]
comp4017_c0	384	222641246	EEE69378.1	1190	1	354	1075	1189	118	91	103	77.1186	479	2.17e-53	hypothetical protein OsJ_28729 [Oryza sativa Japonica Group]
comp4038_c0	358	296086720	CBI32355.3	113	86	211	67	108	42	24	31	57.1429	137	3.65e-09	unnamed protein product [Vitis vinifera]
comp4042_c0	215	147815423	CAN76722.1	259	115	213	224	256	33	26	32	78.7879	142	8.88e-10	hypothetical protein VITISV_029641 [Vitis vinifera]
comp4059_c0	251	317148611	XP_001822836.2	199	2	250	82	166	85	61	69	71.7647	314	1.21e-34	pyrazinamidase/nicotinamidase [Aspergillus oryzae RIB40]
comp4063_c0	480	147779458	CAN69925.1	982	1	462	610	747	154	62	82	40.2597	272	3.89e-25	hypothetical protein VITISV_027208 [Vitis vinifera]
comp4075_c0	365	390602010	EIN11403.1	51	18	149	1	44	44	42	42	95.4545	214	7.97e-21	ribosomal protein L39e [Punctularia strigosozonata HHB-11173 SS5]
comp4088_c0	445	255547764	XP_002514939.1	997	64	399	882	994	113	45	65	39.823	214	1.29e-17	serine-threonine protein kinase, plant-type, putative [Ricinus communis] >gi|223545990|gb|EEF47493.1| serine-threonine protein kinase, plant-type, putative [Ricinus communis]
comp4099_c0	367	147844568	CAN80061.1	960	2	283	351	449	103	44	52	42.7184	138	5.58e-08	hypothetical protein VITISV_007942 [Vitis vinifera]
comp4108_c0	385	255564605	XP_002523297.1	591	1	384	213	340	128	109	120	85.1562	566	1.89e-67	calcium-transporting atpase 4, endoplasmic reticulum-type, putative [Ricinus communis] >gi|223537385|gb|EEF39013.1| calcium-transporting atpase 4, endoplasmic reticulum-type, putative [Ricinus communis]
comp4109_c0	457	328774747	AEB39773.1	1073	2	454	154	309	156	60	93	38.4615	278	4.82e-26	pentatricopeptide repeat protein 43 [Funaria hygrometrica]
comp4120_c0	448	255580155	XP_002530909.1	659	2	448	431	579	149	121	139	81.2081	486	3.05e-55	ATP-binding cassette transporter, putative [Ricinus communis] >gi|223529531|gb|EEF31485.1| ATP-binding cassette transporter, putative [Ricinus communis]
comp4124_c0	380	169848048	XP_001830732.1	295	1	261	3	89	87	74	79	85.0575	351	1.52e-38	40S ribosomal protein S0 [Coprinopsis cinerea okayama7#130] >gi|229891584|sp|A8N7C6.1|RSSA_COPC7 RecName: Full=40S ribosomal protein S0 >gi|116508206|gb|EAU91101.1| 40S ribosomal protein S0 [Coprinopsis cinerea okayama7#130]
comp4144_c0	220	222617379	EEE53511.1	1441	8	205	512	574	66	27	38	40.9091	129	2.38e-07	hypothetical protein OsJ_36687 [Oryza sativa Japonica Group]
comp4150_c0	446	357122034	XP_003562721.1	689	2	217	604	675	72	44	57	61.1111	257	1.49e-23	PREDICTED: putative pentatricopeptide repeat-containing protein At3g25970-like [Brachypodium distachyon]
comp4153_c0	407	4406792	AAD20101.1	764	1	378	476	601	126	97	110	76.9841	531	1.88e-61	putative retroelement pol polyprotein [Arabidopsis thaliana]
comp4169_c0	402	119174258	XP_001239490.1	316	3	401	130	262	133	119	126	89.4737	659	3.97e-84	hypothetical protein CIMG_09111 [Coccidioides immitis RS] >gi|303314147|ref|XP_003067082.1| guanine nucleotide-binding protein beta subunit, putative [Coccidioides posadasii C735 delta SOWgp] >gi|240106750|gb|EER24937.1| guanine nucleotide-binding protein beta subunit, putative [Coccidioides posadasii C735 delta SOWgp] >gi|320037326|gb|EFW19263.1| guanine nucleotide binding protein [Coccidioides …
comp4183_c0	227	356570526	XP_003553436.1	365	1	225	268	342	75	72	73	96	313	2.5e-33	PREDICTED: probable protein kinase At2g41970-like [Glycine max]
comp4239_c0	263	242067305	XP_002448929.1	556	3	251	290	372	83	67	73	80.7229	390	3.62e-43	hypothetical protein SORBIDRAFT_05g001745 [Sorghum bicolor] >gi|241934772|gb|EES07917.1| hypothetical protein SORBIDRAFT_05g001745 [Sorghum bicolor]
comp4240_c0	454	226501760	NP_001149383.1	429	2	454	222	372	151	103	117	68.2119	543	4.16e-65	serine/threonine-protein kinase receptor [Zea mays] >gi|195626840|gb|ACG35250.1| serine/threonine-protein kinase receptor precursor [Zea mays]
comp4253_c0	937	324388020	ADY38782.1	358	239	937	125	357	233	216	225	92.7039	1124	8.14e-151	myosin-like protein XIE [Coffea arabica]
comp4279_c0	261	147794801	CAN71427.1	1300	1	132	1225	1268	44	27	35	61.3636	145	2.56e-09	hypothetical protein VITISV_027864 [Vitis vinifera]
comp4286_c0	754	255577035	XP_002529402.1	469	2	730	226	469	244	186	215	76.2295	1053	1.94e-139	serine carboxypeptidase, putative [Ricinus communis] >gi|223531150|gb|EEF32998.1| serine carboxypeptidase, putative [Ricinus communis]
comp4301_c0	252	169603618	XP_001795230.1	151	3	221	1	73	73	55	67	75.3425	217	8.71e-21	hypothetical protein SNOG_04817 [Phaeosphaeria nodorum SN15] >gi|111066088|gb|EAT87208.1| hypothetical protein SNOG_04817 [Phaeosphaeria nodorum SN15]
comp4351_c0	360	361127994	EHK99946.1	136	236	358	83	123	41	39	40	95.122	132	2.16e-08	putative 40S ribosomal protein S24-B [Glarea lozoyensis 74030]
comp4357_c0	549	109390462	ABG33770.1	224	152	547	1	133	133	89	106	66.9173	474	1.02e-56	pectin acetylesterase precursor [Musa acuminata]
comp4401_c0	304	255571897	XP_002526891.1	1013	1	276	924	1006	92	41	59	44.5652	197	6.25e-16	serine-threonine protein kinase, plant-type, putative [Ricinus communis] >gi|223533790|gb|EEF35522.1| serine-threonine protein kinase, plant-type, putative [Ricinus communis]
comp4410_c0	431	367037221	XP_003648991.1	71	153	365	1	71	71	60	64	84.507	300	4e-33	hypothetical protein THITE_2107085 [Thielavia terrestris NRRL 8126] >gi|346996252|gb|AEO62655.1| hypothetical protein THITE_2107085 [Thielavia terrestris NRRL 8126]
comp4454_c0	299	310798204	EFQ33097.1	857	3	299	535	633	99	70	83	70.7071	363	1.92e-38	OPT oligopeptide transporter [Glomerella graminicola M1.001]
comp4471_c0	761	225462035	XP_002268527.1	232	91	732	1	216	216	170	194	78.7037	907	6.91e-121	PREDICTED: probable calcium-binding protein CML21 [Vitis vinifera] >gi|296089985|emb|CBI39804.3| unnamed protein product [Vitis vinifera]
comp4483_c0	265	58268544	XP_571428.1	494	2	259	11	96	86	64	76	74.4186	372	7.76e-41	hypothetical protein [Cryptococcus neoformans var. neoformans JEC21] >gi|134112638|ref|XP_774862.1| hypothetical protein CNBF0270 [Cryptococcus neoformans var. neoformans B-3501A] >gi|50257510|gb|EAL20215.1| hypothetical protein CNBF0270 [Cryptococcus neoformans var. neoformans B-3501A] >gi|57227663|gb|AAW44121.1| expressed protein [Cryptococcus neoformans var. neoformans JEC21]
comp4485_c0	288	398412115	XP_003857387.1	202	2	286	93	187	95	80	86	84.2105	417	6.78e-50	60S ribosomal protein L16 [Mycosphaerella graminicola IPO323] >gi|339477272|gb|EGP92363.1| hypothetical protein MYCGRDRAFT_102406 [Mycosphaerella graminicola IPO323]
comp4491_c0	309	125602253	EAZ41578.1	362	1	279	232	337	108	59	74	54.6296	286	4.9e-29	hypothetical protein OsJ_26112 [Oryza sativa Japonica Group]
comp4492_c0	258	169846646	XP_001830037.1	499	1	258	290	375	86	74	81	86.0465	388	4.03e-43	serine-type endopeptidase [Coprinopsis cinerea okayama7#130] >gi|116508807|gb|EAU91702.1| serine-type endopeptidase [Coprinopsis cinerea okayama7#130]
comp4495_c0	489	224075411	XP_002304622.1	469	34	489	3	153	153	65	99	42.4837	335	1.28e-34	predicted protein [Populus trichocarpa] >gi|222842054|gb|EEE79601.1| predicted protein [Populus trichocarpa]
comp4503_c0	504	169862066	XP_001837664.1	208	2	469	1	161	164	77	110	46.9512	370	1.29e-41	hypothetical protein CC1G_08677 [Coprinopsis cinerea okayama7#130] >gi|116501241|gb|EAU84136.1| hypothetical protein CC1G_08677 [Coprinopsis cinerea okayama7#130]
comp4508_c0	426	356536063	XP_003536560.1	227	16	408	51	199	149	43	72	28.8591	160	1.17e-11	PREDICTED: protein NDR1-like [Glycine max]
comp4509_c0	284	197306170	ACH59436.1	107	1	177	17	75	59	51	56	86.4407	273	1.92e-29	heat shock protein 70 kDa [Pseudotsuga menziesii] >gi|197306172|gb|ACH59437.1| heat shock protein 70 kDa [Pseudotsuga menziesii] >gi|197306174|gb|ACH59438.1| heat shock protein 70 kDa [Pseudotsuga menziesii] >gi|197306176|gb|ACH59439.1| heat shock protein 70 kDa [Pseudotsuga menziesii] >gi|197306178|gb|ACH59440.1| heat shock protein 70 kDa [Pseudotsuga menziesii] >gi|197306180|gb|ACH59441.1| heat…
comp4532_c0	312	164510343	CAJ58640.1	135	5	310	12	113	102	51	65	50	274	4.54e-29	putative reverse transcriptase [Cucumis melo]
comp4542_c0	231	68685649	AAY99339.1	1307	57	206	729	782	54	28	39	51.8519	146	1.5e-09	pol-polyprotein [Silene latifolia]
comp4582_c0	349	396582334	AFN88198.1	725	3	245	1	81	81	39	54	48.1481	228	5.53e-20	retropepsin-like protein [Phaseolus vulgaris]
comp4591_c0	1467	359492355	XP_002284688.2	745	236	1465	31	445	432	170	231	39.3519	588	1.31e-64	PREDICTED: wall-associated receptor kinase 2-like [Vitis vinifera]
comp4616_c0	624	255544409	XP_002513266.1	572	5	388	437	564	128	66	88	51.5625	341	1.31e-34	1,8-cineole synthase, chloroplast precursor, putative [Ricinus communis] >gi|223547640|gb|EEF49134.1| 1,8-cineole synthase, chloroplast precursor, putative [Ricinus communis]
comp4638_c0	458	255550065	XP_002516083.1	371	2	250	1	84	84	54	66	64.2857	287	2.06e-28	Heat shock factor protein HSF30, putative [Ricinus communis] >gi|223544569|gb|EEF46085.1| Heat shock factor protein HSF30, putative [Ricinus communis]
comp4639_c0	302	357117411	XP_003560462.1	770	57	302	562	643	82	46	52	56.0976	204	5.22e-17	PREDICTED: probable leucine-rich repeat receptor-like protein kinase At1g35710-like [Brachypodium distachyon]
comp4660_c0	1724	225427718	XP_002274534.1	840	2	1507	341	840	504	428	467	84.9206	2226	0	PREDICTED: DNA replication licensing factor MCM4 [Vitis vinifera]
comp4668_c0	445	147773693	CAN72030.1	238	3	341	91	202	113	100	106	88.4956	455	2.73e-54	hypothetical protein VITISV_018744 [Vitis vinifera]
comp4674_c0	1638	87116466	BAE79385.1	1366	472	1611	854	1239	410	103	161	25.122	247	2.04e-19	unnamed protein product [Ipomoea batatas]
comp4678_c0	257	38194910	AAR13298.1	1290	2	226	1110	1184	75	47	62	62.6667	280	3.06e-27	gag-pol polyprotein [Phaseolus vulgaris]
comp4680_c0	940	224058340	XP_002299484.1	142	419	835	2	139	141	58	79	41.1348	199	2.31e-16	predicted protein [Populus trichocarpa] >gi|222846742|gb|EEE84289.1| predicted protein [Populus trichocarpa]
comp4711_c0	816	225462675	XP_002266751.1	1018	34	750	234	489	260	93	137	35.7692	359	2.17e-35	PREDICTED: uncharacterized protein LOC100243267 [Vitis vinifera]
comp4727_c0	246	398409098	XP_003856014.1	346	1	246	92	173	82	64	73	78.0488	342	2.03e-37	hypothetical protein MYCGRDRAFT_32802, partial [Mycosphaerella graminicola IPO323] >gi|339475899|gb|EGP90990.1| hypothetical protein MYCGRDRAFT_32802 [Mycosphaerella graminicola IPO323]
comp4754_c0	397	115462459	NP_001054829.1	617	28	231	14	86	73	35	47	47.9452	129	6.68e-07	Os05g0185800 [Oryza sativa Japonica Group] >gi|53749292|gb|AAU90151.1| unknown protein [Oryza sativa Japonica Group] >gi|113578380|dbj|BAF16743.1| Os05g0185800 [Oryza sativa Japonica Group] >gi|125551101|gb|EAY96810.1| hypothetical protein OsI_18737 [Oryza sativa Indica Group] >gi|215694347|dbj|BAG89340.1| unnamed protein product [Oryza sativa Japonica Group] >gi|222630444|gb|EEE62576.1| hypothet…
comp4756_c0	316	147819992	CAN60557.1	110	3	305	10	110	101	49	68	48.5149	228	1.55e-22	hypothetical protein VITISV_035871 [Vitis vinifera]
comp4770_c0	246	357134847	XP_003569027.1	1060	2	241	711	790	80	62	68	77.5	319	1.11e-32	PREDICTED: 125 kDa kinesin-related protein-like [Brachypodium distachyon]
comp4776_c0	221	398392523	XP_003849721.1	352	2	220	167	239	73	66	72	90.411	276	3.69e-28	hypothetical protein MYCGRDRAFT_101210 [Mycosphaerella graminicola IPO323] >gi|339469598|gb|EGP84697.1| hypothetical protein MYCGRDRAFT_101210 [Mycosphaerella graminicola IPO323]
comp4777_c0	442	340517473	EGR47717.1	294	3	209	214	283	70	45	52	64.2857	195	4.32e-16	predicted protein [Trichoderma reesei QM6a]
comp4816_c0	318	301335168	BAJ12091.1	515	36	317	422	515	94	81	85	86.1702	441	3.27e-50	laccase lcc5 [Lentinula edodes]
comp4833_c0	346	356509525	XP_003523498.1	558	11	346	447	558	112	78	97	69.6429	462	6.82e-53	PREDICTED: exoglucanase xynX-like [Glycine max]
comp4845_c0	735	323444331	ADX68910.1	232	2	628	27	232	209	145	171	69.378	742	4.91e-96	brassinosteroid-like receptor protein [Picea abies] >gi|323444333|gb|ADX68911.1| brassinosteroid-like receptor protein [Picea abies] >gi|323444335|gb|ADX68912.1| brassinosteroid-like receptor protein [Picea abies] >gi|323444337|gb|ADX68913.1| brassinosteroid-like receptor protein [Picea mariana] >gi|323444339|gb|ADX68914.1| brassinosteroid-like receptor protein [Picea mariana] >gi|323444341|gb|AD…
comp4849_c0	413	302766001	XP_002966421.1	105	18	308	7	103	97	56	72	57.732	278	1.49e-29	hypothetical protein SELMODRAFT_439710 [Selaginella moellendorffii] >gi|302792755|ref|XP_002978143.1| hypothetical protein SELMODRAFT_271281 [Selaginella moellendorffii] >gi|300154164|gb|EFJ20800.1| hypothetical protein SELMODRAFT_271281 [Selaginella moellendorffii] >gi|300165841|gb|EFJ32448.1| hypothetical protein SELMODRAFT_439710 [Selaginella moellendorffii]
comp4882_c0	266	321254242	XP_003193010.1	498	1	264	136	223	88	84	87	95.4545	469	1.16e-54	hydroxymethylglutaryl-CoA synthase [Cryptococcus gattii WM276] >gi|317459479|gb|ADV21223.1| hydroxymethylglutaryl-CoA synthase, putative [Cryptococcus gattii WM276]
comp4898_c0	299	356522732	XP_003530000.1	1079	2	298	805	901	99	80	90	80.8081	428	3.58e-47	PREDICTED: DNA mismatch repair protein Msh6-2-like [Glycine max]
comp4902_c0	313	358397348	EHK46723.1	1003	17	298	910	1003	94	58	74	61.7021	277	1.3e-26	plasma membrane H+-ATPase [Trichoderma atroviride IMI 206040]
comp4920_c0	842	334188253	NP_001190489.1	1129	54	251	991	1056	66	43	54	65.1515	239	9.51e-34	uncharacterized protein [Arabidopsis thaliana] >gi|332008267|gb|AED95650.1| uncharacterized protein [Arabidopsis thaliana]
comp4923_c0	285	398406997	XP_003854964.1	296	2	283	32	125	94	81	86	86.1702	444	9.48e-53	ERG25, C-4 methyl sterol oxidase [Mycosphaerella graminicola IPO323] >gi|339474848|gb|EGP89940.1| ERG25, C-4 methyl sterol oxidase [Mycosphaerella graminicola IPO323]
comp4932_c0	807	147853054	CAN82769.1	2220	8	358	924	1039	117	47	75	40.1709	221	8.8e-18	hypothetical protein VITISV_037882 [Vitis vinifera]
comp4953_c0	304	297598738	NP_001046148.2	308	1	303	175	275	101	63	86	62.3762	333	4.49e-36	Os02g0190300 [Oryza sativa Japonica Group] >gi|255670673|dbj|BAF08062.2| Os02g0190300 [Oryza sativa Japonica Group]
comp4958_c0	343	392572037	EIW65209.1	307	65	337	27	117	91	71	77	78.022	362	4.03e-40	hypothetical protein TRAVEDRAFT_109203, partial [Trametes versicolor FP-101664 SS1]
comp4989_c0	681	359472733	XP_002277177.2	611	2	622	404	611	209	124	152	59.3301	649	7.09e-78	PREDICTED: LOW QUALITY PROTEIN: endoglucanase 5-like [Vitis vinifera]
comp5000_c0	336	388516601	AFK46362.1	381	22	306	287	381	95	65	77	68.4211	373	3.68e-41	unknown [Medicago truncatula]
comp5032_c0	256	392577513	EIW70642.1	894	138	254	831	869	39	34	37	87.1795	181	4.48e-14	hypothetical protein TREMEDRAFT_73526 [Tremella mesenterica DSM 1558]
comp5052_c0	517	297806677	XP_002871222.1	315	55	516	153	314	166	69	101	41.5663	213	2.62e-18	hypothetical protein ARALYDRAFT_487469 [Arabidopsis lyrata subsp. lyrata] >gi|297317059|gb|EFH47481.1| hypothetical protein ARALYDRAFT_487469 [Arabidopsis lyrata subsp. lyrata]
comp5089_c0	220	398402885	XP_003853239.1	471	5	220	205	276	72	61	66	84.7222	358	3.11e-39	hypothetical protein MYCGRDRAFT_109293 [Mycosphaerella graminicola IPO323] >gi|339473121|gb|EGP88215.1| hypothetical protein MYCGRDRAFT_109293 [Mycosphaerella graminicola IPO323]
comp5097_c0	415	321257566	XP_003193633.1	406	75	212	123	168	46	35	40	76.087	187	1.24e-14	fk506-binding protein 39 kDa [Cryptococcus gattii WM276] >gi|317460103|gb|ADV21846.1| Fk506-binding protein 39 kDa, putative [Cryptococcus gattii WM276]
comp5102_c0	219	147817099	CAN66439.1	2076	3	218	1538	1609	72	39	51	54.1667	196	3.72e-16	hypothetical protein VITISV_035236 [Vitis vinifera]
comp5104_c0	838	108710703	ABF98498.1	227	201	782	1	194	194	152	172	78.3505	781	2.06e-101	Tat binding protein 1 containing protein, expressed [Oryza sativa Japonica Group] >gi|215736883|dbj|BAG95812.1| unnamed protein product [Oryza sativa Japonica Group] >gi|218193619|gb|EEC76046.1| hypothetical protein OsI_13231 [Oryza sativa Indica Group] >gi|222625657|gb|EEE59789.1| hypothetical protein OsJ_12305 [Oryza sativa Japonica Group]
comp5110_c0	552	359487654	XP_003633628.1	1267	2	193	1199	1260	64	29	42	45.3125	149	4.79e-09	PREDICTED: uncharacterized protein LOC100854181 [Vitis vinifera]
comp5111_c0	287	392579371	EIW72498.1	266	3	287	79	174	96	69	80	71.875	249	2.26e-24	hypothetical protein TREMEDRAFT_17826, partial [Tremella mesenterica DSM 1558]
comp5137_c0	223	170088306	XP_001875376.1	411	8	223	283	354	72	56	64	77.7778	312	5.72e-33	predicted protein [Laccaria bicolor S238N-H82] >gi|164650576|gb|EDR14817.1| predicted protein [Laccaria bicolor S238N-H82]
comp5137_c1	386	170088306	XP_001875376.1	411	1	384	158	285	128	94	108	73.4375	481	1.48e-56	predicted protein [Laccaria bicolor S238N-H82] >gi|164650576|gb|EDR14817.1| predicted protein [Laccaria bicolor S238N-H82]
comp5142_c0	293	222618020	EEE54152.1	250	6	248	167	244	81	49	66	60.4938	279	7.97e-29	hypothetical protein OsJ_00958 [Oryza sativa Japonica Group]
comp5170_c0	233	389745355	EIM86536.1	318	116	232	267	305	39	20	29	51.2821	118	3.35e-06	hypothetical protein STEHIDRAFT_139394 [Stereum hirsutum FP-91666 SS1]
comp5190_c0	278	170090011	XP_001876228.1	254	1	276	6	97	95	66	78	69.4737	320	6.54e-35	predicted protein [Laccaria bicolor S238N-H82] >gi|164649488|gb|EDR13730.1| predicted protein [Laccaria bicolor S238N-H82]
comp5191_c0	395	94983056	ABF50233.1	206	103	393	16	112	97	87	93	89.6907	462	5.79e-56	AGAMOUS, partial [Nicotiana langsdorffii x Nicotiana sanderae]
comp5218_c0	299	336366383	EGN94730.1	186	25	297	67	151	91	56	67	61.5385	300	2.24e-32	hypothetical protein SERLA73DRAFT_143588 [Serpula lacrymans var. lacrymans S7.3] >gi|336379054|gb|EGO20210.1| hypothetical protein SERLADRAFT_400355 [Serpula lacrymans var. lacrymans S7.9]
comp5245_c0	640	357139552	XP_003571345.1	188	169	474	72	188	117	42	58	35.8974	141	1.05e-08	PREDICTED: uncharacterized protein LOC100832250 [Brachypodium distachyon]
comp5259_c0	474	392578551	EIW71679.1	273	30	473	2	143	148	88	104	59.4595	274	5.12e-27	hypothetical protein TREMEDRAFT_43002 [Tremella mesenterica DSM 1558]
comp5288_c0	561	398389440	XP_003848181.1	392	1	561	35	221	187	96	135	51.3369	473	1.25e-54	hypothetical protein MYCGRDRAFT_77324 [Mycosphaerella graminicola IPO323] >gi|339468055|gb|EGP83157.1| hypothetical protein MYCGRDRAFT_77324 [Mycosphaerella graminicola IPO323]
comp5305_c0	400	253760771	XP_002489007.1	84	290	397	28	63	36	27	30	75	134	9.33e-09	hypothetical protein SORBIDRAFT_0506s002030 [Sorghum bicolor] >gi|241947354|gb|EES20499.1| hypothetical protein SORBIDRAFT_0506s002030 [Sorghum bicolor]
comp5346_c0	449	358349383	XP_003638717.1	385	34	240	140	208	69	45	49	65.2174	213	1.03e-25	Cell wall-associated hydrolase [Medicago truncatula] >gi|355504652|gb|AES85855.1| Cell wall-associated hydrolase [Medicago truncatula]
comp5347_c0	465	147820365	CAN61108.1	329	105	389	231	324	95	43	65	45.2632	203	4.44e-17	hypothetical protein VITISV_011301 [Vitis vinifera]
comp5350_c0	471	242072362	XP_002446117.1	247	102	314	82	152	71	25	38	35.2113	137	2.84e-08	hypothetical protein SORBIDRAFT_06g001955 [Sorghum bicolor] >gi|241937300|gb|EES10445.1| hypothetical protein SORBIDRAFT_06g001955 [Sorghum bicolor]
comp5352_c0	478	225440426	XP_002271148.1	368	2	478	135	293	159	106	135	66.6667	611	8.55e-76	PREDICTED: protein SRG1-like [Vitis vinifera]
comp5355_c0	470	226509514	NP_001140313.1	232	1	456	81	232	152	113	130	74.3421	621	4.45e-79	uncharacterized protein LOC100272358 [Zea mays] >gi|224029175|gb|ACN33663.1| unknown [Zea mays]
comp5400_c0	1291	357165067	XP_003580259.1	411	81	1289	9	411	403	339	370	84.1191	1864	0	PREDICTED: glutamate dehydrogenase 2-like [Brachypodium distachyon]
comp5412_c0	266	392576732	EIW69862.1	645	2	199	16	75	66	34	40	51.5152	134	7.09e-08	hypothetical protein TREMEDRAFT_43516 [Tremella mesenterica DSM 1558]
comp5428_c0	313	357133701	XP_003568462.1	394	2	253	289	372	84	52	68	61.9048	193	5.81e-16	PREDICTED: auxin-induced protein 5NG4-like [Brachypodium distachyon]
comp5452_c0	421	194239624	BAG55221.1	111	128	421	14	111	98	63	72	64.2857	340	1.37e-38	peroxidase 2 [Sesbania rostrata]
comp5456_c0	217	169620263	XP_001803543.1	133	2	160	81	133	53	52	52	98.1132	254	1.16e-26	hypothetical protein SNOG_13334 [Phaeosphaeria nodorum SN15] >gi|160703995|gb|EAT79218.2| hypothetical protein SNOG_13334 [Phaeosphaeria nodorum SN15]
comp5460_c0	351	169625356	XP_001806082.1	279	61	237	211	269	59	41	44	69.4915	205	6.86e-18	hypothetical protein SNOG_15951 [Phaeosphaeria nodorum SN15] >gi|111055669|gb|EAT76789.1| hypothetical protein SNOG_15951 [Phaeosphaeria nodorum SN15]
comp5474_c0	429	242072522	XP_002446197.1	574	39	425	81	209	129	67	96	51.938	393	1.33e-42	hypothetical protein SORBIDRAFT_06g003350 [Sorghum bicolor] >gi|241937380|gb|EES10525.1| hypothetical protein SORBIDRAFT_06g003350 [Sorghum bicolor]
comp5505_c0	524	242093834	XP_002437407.1	1609	166	414	301	384	84	36	43	42.8571	140	3.67e-15	hypothetical protein SORBIDRAFT_10g026363 [Sorghum bicolor] >gi|241915630|gb|EER88774.1| hypothetical protein SORBIDRAFT_10g026363 [Sorghum bicolor]
comp5514_c0	316	321257566	XP_003193633.1	406	133	291	1	53	53	39	47	73.5849	227	1.15e-20	fk506-binding protein 39 kDa [Cryptococcus gattii WM276] >gi|317460103|gb|ADV21846.1| Fk506-binding protein 39 kDa, putative [Cryptococcus gattii WM276]
comp5524_c0	235	392579827	EIW72954.1	378	3	233	170	246	77	69	73	89.6104	370	1.99e-41	hypothetical protein TREMEDRAFT_26712 [Tremella mesenterica DSM 1558]
comp5543_c0	348	353441100	AEQ94134.1	281	11	346	1	112	112	98	103	87.5	520	5.86e-64	putative lipase [Elaeis guineensis]
comp5557_c0	598	255569408	XP_002525671.1	261	37	333	155	257	104	58	80	55.7692	290	7.12e-29	Protein WUSCHEL, putative [Ricinus communis] >gi|223534971|gb|EEF36654.1| Protein WUSCHEL, putative [Ricinus communis]
comp5564_c0	372	358346026	XP_003637074.1	733	53	370	156	273	130	60	71	46.1538	222	4.59e-19	Cell wall-associated hydrolase, partial [Medicago truncatula] >gi|355503009|gb|AES84212.1| Cell wall-associated hydrolase, partial [Medicago truncatula]
comp5603_c0	246	357157785	XP_003577913.1	775	65	205	694	740	47	37	42	78.7234	203	4.01e-17	PREDICTED: uncharacterized protein LOC100824848 [Brachypodium distachyon]
comp5605_c0	1312	255595888	XP_002536412.1	220	65	607	20	198	183	92	118	50.2732	448	9.4e-50	Mitochondrial peroxiredoxin PRX1, putative [Ricinus communis] >gi|223519779|gb|EEF25971.1| Mitochondrial peroxiredoxin PRX1, putative [Ricinus communis]
comp5638_c0	570	357120871	XP_003562148.1	169	48	491	20	167	153	69	87	45.098	241	1.23e-22	PREDICTED: uncharacterized protein LOC100833354 [Brachypodium distachyon]
comp5648_c0	356	1296807	CAA64544.1	479	14	232	126	173	73	39	45	53.4247	195	7.56e-16	xylose isomerase [Hordeum vulgare subsp. vulgare] >gi|1588664|prf||2209268A xylose isomerase
comp5656_c0	392	224096526	XP_002310644.1	514	2	295	408	505	98	68	81	69.3878	287	2.18e-28	predicted protein [Populus trichocarpa] >gi|222853547|gb|EEE91094.1| predicted protein [Populus trichocarpa]
comp5672_c0	306	58260530	XP_567675.1	883	7	255	684	759	83	37	50	44.5783	167	5.7e-12	hypothetical protein [Cryptococcus neoformans var. neoformans JEC21] >gi|134117109|ref|XP_772781.1| hypothetical protein CNBK1550 [Cryptococcus neoformans var. neoformans B-3501A] >gi|50255399|gb|EAL18134.1| hypothetical protein CNBK1550 [Cryptococcus neoformans var. neoformans B-3501A] >gi|57229756|gb|AAW46158.1| expressed protein [Cryptococcus neoformans var. neoformans JEC21]
comp5686_c0	361	345561487	EGX44576.1	107	70	339	5	95	91	52	61	57.1429	215	2.14e-20	hypothetical protein AOL_s00188g244 [Arthrobotrys oligospora ATCC 24927]
comp5693_c0	379	359477742	XP_002281342.2	1082	1	378	105	232	132	76	93	57.5758	255	2.29e-23	PREDICTED: uncharacterized protein LOC100254552 [Vitis vinifera]
comp5700_c0	294	20335	CAA39776.1	440	3	293	31	127	97	78	87	80.4124	441	6.41e-51	alpha-amylase [Oryza sativa Japonica Group]
comp5756_c0	468	242085334	XP_002443092.1	655	1	468	459	614	156	102	133	65.3846	593	1.9e-70	hypothetical protein SORBIDRAFT_08g008260 [Sorghum bicolor] >gi|241943785|gb|EES16930.1| hypothetical protein SORBIDRAFT_08g008260 [Sorghum bicolor]
comp5780_c0	632	255571990	XP_002526936.1	543	160	558	360	489	133	49	78	36.8421	193	1.6e-14	conserved hypothetical protein [Ricinus communis] >gi|223533688|gb|EEF35423.1| conserved hypothetical protein [Ricinus communis]
comp5816_c0	1241	224070434	XP_002303149.1	1194	1	1176	183	560	393	241	283	61.3232	1203	5.95e-151	predicted protein [Populus trichocarpa] >gi|222840581|gb|EEE78128.1| predicted protein [Populus trichocarpa]
comp5845_c0	387	255558888	XP_002520467.1	453	109	384	341	432	92	57	75	61.9565	333	7.61e-35	UDP-glucuronosyltransferase, putative [Ricinus communis] >gi|223540309|gb|EEF41880.1| UDP-glucuronosyltransferase, putative [Ricinus communis]
comp5889_c0	314	125551142	EAY96851.1	758	3	302	62	175	114	69	76	60.5263	372	6.45e-40	hypothetical protein OsI_18772 [Oryza sativa Indica Group]
comp5893_c0	380	242061600	XP_002452089.1	780	3	302	67	168	102	59	71	57.8431	281	5.55e-27	hypothetical protein SORBIDRAFT_04g019230 [Sorghum bicolor] >gi|241931920|gb|EES05065.1| hypothetical protein SORBIDRAFT_04g019230 [Sorghum bicolor]
comp5903_c0	255	56784474	BAD82567.1	578	33	254	249	322	74	54	63	72.973	309	5.9e-32	putative dual-specific kinase DSK1 [Oryza sativa Japonica Group] >gi|56784640|dbj|BAD81687.1| putative dual-specific kinase DSK1 [Oryza sativa Japonica Group]
comp5910_c0	329	398406487	XP_003854709.1	296	2	328	106	220	115	69	84	60	347	3.71e-38	hypothetical protein MYCGRDRAFT_103011 [Mycosphaerella graminicola IPO323] >gi|339474593|gb|EGP89685.1| hypothetical protein MYCGRDRAFT_103011 [Mycosphaerella graminicola IPO323]
comp5920_c0	396	218190293	EEC72720.1	506	1	396	47	178	132	114	126	86.3636	621	2.57e-76	hypothetical protein OsI_06325 [Oryza sativa Indica Group]
comp5930_c0	202	1352314	P48407.1	396	20	202	66	126	61	38	49	62.2951	215	1.04e-19	RecName: Full=Pinosylvin synthase 1; AltName: Full=Stilbene synthase 1; Short=STS 1 >gi|762992|emb|CAA87012.1| stilbene synthase [Pinus strobus] >gi|1095543|prf||2109262B stilbene synthase:ISOTYPE=1
comp5958_c0	273	1174171	AAB41816.1	367	2	271	204	293	90	55	73	61.1111	302	1.71e-31	NTH1 [Pisum sativum]
comp5963_c0	632	169851342	XP_001832361.1	492	349	627	54	146	95	40	55	42.1053	166	3.46e-11	RAN protein binding protein [Coprinopsis cinerea okayama7#130] >gi|116506500|gb|EAU89395.1| RAN protein binding protein [Coprinopsis cinerea okayama7#130]
comp5978_c0	454	361129053	EHL00974.1	420	3	434	1	142	146	96	111	65.7534	431	9.58e-49	putative Aromatic peroxygenase [Glarea lozoyensis 74030]
comp5997_c0	290	26453229	BAC43688.1	165	33	287	27	111	85	73	80	85.8824	392	1.43e-46	putative lysine decarboxylase [Arabidopsis thaliana] >gi|28372900|gb|AAO39932.1| At5g06300 [Arabidopsis thaliana]
comp5999_c0	506	125596130	EAZ35910.1	641	290	451	586	639	54	33	38	61.1111	191	1.39e-14	hypothetical protein OsJ_20213 [Oryza sativa Japonica Group]
comp6002_c0	360	242063120	XP_002452849.1	495	1	360	255	374	120	81	99	67.5	442	2.5e-50	hypothetical protein SORBIDRAFT_04g033520 [Sorghum bicolor] >gi|241932680|gb|EES05825.1| hypothetical protein SORBIDRAFT_04g033520 [Sorghum bicolor]
comp6021_c0	321	115488218	NP_001066596.1	235	19	321	15	119	105	37	55	35.2381	147	3.79e-10	Os12g0289600 [Oryza sativa Japonica Group] >gi|113649103|dbj|BAF29615.1| Os12g0289600 [Oryza sativa Japonica Group]
comp6028_c0	413	253761864	XP_002489306.1	143	123	389	1	88	90	28	48	31.1111	117	3.55e-06	hypothetical protein SORBIDRAFT_0010s007690 [Sorghum bicolor] >gi|241946954|gb|EES20099.1| hypothetical protein SORBIDRAFT_0010s007690 [Sorghum bicolor]
comp6079_c0	290	297723331	NP_001174029.1	108	28	276	23	106	84	41	55	48.8095	208	1.13e-19	Os04g0542000 [Oryza sativa Japonica Group] >gi|255675650|dbj|BAH92757.1| Os04g0542000 [Oryza sativa Japonica Group]
comp6083_c0	251	378726445	EHY52904.1	496	2	250	205	287	83	75	81	90.3614	390	1.76e-43	aldehyde dehydrogenase [Exophiala dermatitidis NIH/UT8656]
comp6084_c0	521	110289052	ABB47537.2	1172	170	517	123	246	124	58	78	46.7742	273	4.74e-25	retrotransposon protein, putative, unclassified [Oryza sativa Japonica Group]
comp6086_c0	747	225456215	XP_002279078.1	286	3	650	18	280	263	136	167	51.711	642	4.8e-80	PREDICTED: uncharacterized protein LOC100254209 [Vitis vinifera] >gi|297734355|emb|CBI15602.3| unnamed protein product [Vitis vinifera]
comp6120_c0	411	321249350	XP_003191429.1	442	45	410	186	307	122	79	103	64.7541	445	8.32e-51	single-stranded DNA binding protein [Cryptococcus gattii WM276] >gi|317457896|gb|ADV19642.1| single-stranded DNA binding protein, putative [Cryptococcus gattii WM276]
comp6145_c0	214	361126398	EHK98400.1	160	12	212	2	72	71	40	47	56.338	204	4.95e-19	hypothetical protein M7I_5775 [Glarea lozoyensis 74030]
comp6171_c0	556	357494573	XP_003617575.1	488	207	554	130	245	116	96	107	82.7586	527	1.03e-61	DNA mismatch repair protein mutS [Medicago truncatula] >gi|355518910|gb|AET00534.1| DNA mismatch repair protein mutS [Medicago truncatula]
comp6217_c0	451	398394477	XP_003850697.1	378	1	450	52	202	151	107	121	70.8609	571	8.17e-70	hypothetical protein MYCGRDRAFT_73972 [Mycosphaerella graminicola IPO323] >gi|339470576|gb|EGP85673.1| hypothetical protein MYCGRDRAFT_73972 [Mycosphaerella graminicola IPO323]
comp6221_c0	263	147857575	CAN81002.1	1413	2	220	359	431	73	49	60	67.1233	265	3.24e-25	hypothetical protein VITISV_006993 [Vitis vinifera]
comp6232_c0	988	212722140	NP_001132392.1	513	377	952	68	270	203	64	95	31.5271	261	1.18e-22	uncharacterized protein LOC100193838 [Zea mays] >gi|194694258|gb|ACF81213.1| unknown [Zea mays]
comp6235_c0	231	224143609	XP_002325015.1	201	2	229	30	99	77	39	51	50.6494	165	4.24e-13	predicted protein [Populus trichocarpa] >gi|222866449|gb|EEF03580.1| predicted protein [Populus trichocarpa]
comp6287_c0	218	169783454	XP_001826189.1	391	4	216	247	317	71	50	57	70.4225	251	1.05e-24	mannitol-1-phosphate 5-dehydrogenase [Aspergillus oryzae RIB40] >gi|238493247|ref|XP_002377860.1| mannitol-1-phosphate dehydrogenase [Aspergillus flavus NRRL3357] >gi|121798032|sp|Q2U059.1|MTLD_ASPOR RecName: Full=Mannitol-1-phosphate 5-dehydrogenase; Short=M1PDH; Short=MPD; Short=MPDH >gi|83774933|dbj|BAE65056.1| unnamed protein product [Aspergillus oryzae RIB40] >gi|220696354|gb|EED52696.1| man…
comp6366_c0	573	224064192	XP_002301401.1	441	13	570	67	261	195	106	140	54.359	599	1.03e-72	predicted protein [Populus trichocarpa] >gi|222843127|gb|EEE80674.1| predicted protein [Populus trichocarpa]
comp6399_c0	474	225435524	XP_002283009.1	462	2	472	267	425	159	90	118	56.6038	425	2.19e-47	PREDICTED: uncharacterized protein LOC100243206 [Vitis vinifera]
comp6419_c0	461	356499972	XP_003518809.1	199	68	430	36	158	124	67	84	54.0323	298	2.93e-31	PREDICTED: ocs element-binding factor 1-like [Glycine max]
comp6465_c0	1266	147774273	CAN76793.1	1469	3	680	161	368	232	83	124	35.7759	340	1.3e-44	hypothetical protein VITISV_026680 [Vitis vinifera]
comp6466_c0	528	326514578	BAJ96276.1	1083	89	526	36	186	152	83	102	54.6053	338	9.09e-34	predicted protein [Hordeum vulgare subsp. vulgare]
comp6527_c0	249	359491245	XP_002279402.2	2956	91	222	1542	1585	44	20	31	45.4545	119	7.91e-10	PREDICTED: serine/threonine-protein kinase ATM [Vitis vinifera]
comp6596_c0	758	58271322	XP_572817.1	476	3	680	241	463	226	162	194	71.6814	908	1.66e-117	ornithine-oxo-acid aminotransferase [Cryptococcus neoformans var. neoformans JEC21] >gi|57229076|gb|AAW45510.1| ornithine-oxo-acid aminotransferase, putative [Cryptococcus neoformans var. neoformans JEC21]
comp6634_c0	538	147815925	CAN77149.1	1544	252	515	775	862	89	41	64	46.0674	236	1.31e-34	hypothetical protein VITISV_019364 [Vitis vinifera]
comp6636_c0	244	398390177	XP_003848549.1	582	1	243	37	117	81	61	69	75.3086	322	9.17e-34	glycoside hydrolase family 32 protein [Mycosphaerella graminicola IPO323] >gi|339468424|gb|EGP83525.1| putative beta-Fructofuranosidase [Mycosphaerella graminicola IPO323]
comp6643_c0	203	225465569	XP_002263468.1	568	3	203	357	423	67	58	66	86.5672	335	6.61e-36	PREDICTED: uncharacterized protein LOC100263054 [Vitis vinifera] >gi|147791031|emb|CAN61465.1| hypothetical protein VITISV_005001 [Vitis vinifera]
comp6655_c0	449	302795191	XP_002979359.1	146	16	423	5	140	136	77	105	56.6176	431	9.79e-52	hypothetical protein SELMODRAFT_153225 [Selaginella moellendorffii] >gi|302817314|ref|XP_002990333.1| hypothetical protein SELMODRAFT_185190 [Selaginella moellendorffii] >gi|300141895|gb|EFJ08602.1| hypothetical protein SELMODRAFT_185190 [Selaginella moellendorffii] >gi|300153127|gb|EFJ19767.1| hypothetical protein SELMODRAFT_153225 [Selaginella moellendorffii]
comp6665_c0	381	54888728	BAD67183.1	149	103	381	2	93	93	51	67	54.8387	266	2.73e-27	mannose specific lectin [Dioscorea polystachya]
comp6695_c0	604	125589995	EAZ30345.1	704	19	603	482	675	195	119	164	61.0256	698	1.33e-84	hypothetical protein OsJ_14392 [Oryza sativa Japonica Group]
comp6761_c0	523	357161955	XP_003579260.1	724	1	504	25	193	169	141	151	83.432	754	3.83e-93	PREDICTED: protein PROLIFERA-like [Brachypodium distachyon]
comp6769_c0	749	357133918	XP_003568568.1	587	89	748	3	208	221	118	149	53.3937	590	4.54e-69	PREDICTED: uncharacterized protein LOC100845185 [Brachypodium distachyon]
comp6796_c0	440	224080081	XP_002306009.1	870	7	438	364	514	151	79	107	52.3179	386	7.39e-41	predicted protein [Populus trichocarpa] >gi|222848973|gb|EEE86520.1| predicted protein [Populus trichocarpa]
comp6823_c0	636	397530421	AFO53698.1	391	2	634	178	388	211	160	179	75.8294	845	6.74e-110	fruit ripening and abscission polygalacturonase [Elaeis guineensis]
comp6828_c0	361	321265355	XP_003197394.1	239	4	345	103	216	114	87	96	76.3158	406	2.42e-47	hypothetical protein CGB_M3280C [Cryptococcus gattii WM276] >gi|317463873|gb|ADV25607.1| Hypothetical protein CGB_M3280C [Cryptococcus gattii WM276]
comp6845_c0	902	225461181	XP_002280309.1	529	61	891	29	308	280	175	218	62.5	802	3.82e-100	PREDICTED: organic cation transporter protein-like [Vitis vinifera]
comp6850_c0	780	297742931	CBI35798.3	456	3	719	212	453	244	175	205	71.7213	856	8.33e-110	unnamed protein product [Vitis vinifera]
comp6862_c0	265	357155537	XP_003577152.1	436	2	265	223	310	88	69	81	78.4091	386	3.98e-43	PREDICTED: probable protein phosphatase 2C 73-like [Brachypodium distachyon]
comp6916_c0	243	293632010	ADE59485.1	389	45	242	1	66	66	48	56	72.7273	278	2.7e-28	type III polyketide synthase 1 [Musa acuminata AAA Group]
comp6940_c0	546	388508792	AFK42462.1	105	318	476	45	97	53	39	43	73.5849	214	1.53e-19	unknown [Lotus japonicus]
comp6965_c0	725	357130674	XP_003566972.1	519	143	574	125	285	161	64	94	39.7516	282	2.6e-26	PREDICTED: uncharacterized protein LOC100824285 [Brachypodium distachyon]
comp6991_c0	268	388504546	AFK40339.1	223	6	266	116	202	87	48	66	55.1724	254	1.71e-25	unknown [Medicago truncatula]
comp7016_c0	370	115447325	NP_001047442.1	624	123	368	409	490	82	73	80	89.0244	408	6.04e-45	Os02g0617500 [Oryza sativa Japonica Group] >gi|113536973|dbj|BAF09356.1| Os02g0617500 [Oryza sativa Japonica Group]
comp7077_c0	266	242063134	XP_002452856.1	682	2	265	549	635	88	47	57	53.4091	220	2.25e-19	hypothetical protein SORBIDRAFT_04g033640 [Sorghum bicolor] >gi|241932687|gb|EES05832.1| hypothetical protein SORBIDRAFT_04g033640 [Sorghum bicolor]
comp7090_c0	230	356505949	XP_003521751.1	758	5	214	612	682	71	33	45	46.4789	183	1.65e-14	PREDICTED: uncharacterized protein LOC100795835 [Glycine max]
comp7096_c0	268	356546458	XP_003541643.1	1869	19	237	62	134	73	32	49	43.8356	180	8.39e-14	PREDICTED: uncharacterized protein LOC100817727 [Glycine max]
comp7100_c0	324	147799211	CAN74725.1	781	3	323	410	513	107	41	65	38.3178	166	6.78e-12	hypothetical protein VITISV_037264 [Vitis vinifera]
comp7111_c0	649	395146480	AFN53636.1	252	133	507	72	194	125	73	93	58.4	375	3.73e-41	putative homeobox-leucine zipper protein [Linum usitatissimum]
comp7126_c0	501	395146558	AFN53710.1	321	66	416	1	121	124	47	66	37.9032	176	2.87e-13	hypothetical protein [Linum usitatissimum]
comp7132_c0	356	255539156	XP_002510643.1	219	26	355	110	219	110	86	94	78.1818	454	9.11e-55	carboxy-lyase, putative [Ricinus communis] >gi|223551344|gb|EEF52830.1| carboxy-lyase, putative [Ricinus communis]
comp7138_c0	840	115481776	NP_001064481.1	338	67	834	57	338	282	119	171	42.1986	562	6.45e-67	Os10g0378400 [Oryza sativa Japonica Group] >gi|113639090|dbj|BAF26395.1| Os10g0378400 [Oryza sativa Japonica Group]
comp7151_c0	246	134113789	XP_774479.1	61	16	165	1	50	50	41	45	82	215	2.51e-21	hypothetical protein CNBG1250 [Cryptococcus neoformans var. neoformans B-3501A] >gi|50257117|gb|EAL19832.1| hypothetical protein CNBG1250 [Cryptococcus neoformans var. neoformans B-3501A]
comp7156_c0	385	388583538	EIM23839.1	85	3	248	7	79	82	50	57	60.9756	208	2.07e-19	ribosomal protein L38e [Wallemia sebi CBS 633.66]
comp7165_c0	282	102139809	ABF69994.1	103	3	275	1	91	91	61	73	67.033	320	1.76e-36	glutaredoxin family protein [Musa acuminata]
comp7171_c0	251	359496850	XP_003635354.1	2807	1	249	545	627	83	65	76	78.3133	363	3.2e-38	PREDICTED: uncharacterized protein LOC100854728 [Vitis vinifera]
comp7197_c0	389	357160566	XP_003578806.1	78	33	260	3	78	76	42	54	55.2632	185	4.24e-16	PREDICTED: subtilisin-chymotrypsin inhibitor WSCI-like [Brachypodium distachyon]
comp7234_c0	321	58264706	XP_569509.1	640	1	261	1	87	87	84	85	96.5517	458	4.37e-52	heat shock protein 70 [Cryptococcus neoformans var. neoformans JEC21] >gi|134109775|ref|XP_776437.1| hypothetical protein CNBC4920 [Cryptococcus neoformans var. neoformans B-3501A] >gi|50259113|gb|EAL21790.1| hypothetical protein CNBC4920 [Cryptococcus neoformans var. neoformans B-3501A] >gi|56044090|dbj|BAD72840.1| heat shock protein 70 [Cryptococcus neoformans var. neoformans] >gi|57225741|gb|A…
comp7240_c0	252	147853693	CAN83825.1	1349	2	247	444	525	82	48	60	58.5366	264	3.88e-25	hypothetical protein VITISV_043699 [Vitis vinifera]
comp7250_c0	362	255537978	XP_002510054.1	128	73	348	3	98	96	50	63	52.0833	221	4.92e-21	conserved hypothetical protein [Ricinus communis] >gi|223550755|gb|EEF52241.1| conserved hypothetical protein [Ricinus communis]
comp7264_c0	342	109676372	ABG37668.1	1886	2	334	1067	1177	111	81	93	72.973	450	1.96e-49	gag protein [Populus trichocarpa]
comp7267_c0	539	242059159	XP_002458725.1	861	5	535	373	547	177	61	95	34.4633	180	6.4e-13	hypothetical protein SORBIDRAFT_03g039070 [Sorghum bicolor] >gi|241930700|gb|EES03845.1| hypothetical protein SORBIDRAFT_03g039070 [Sorghum bicolor]
comp7279_c0	223	321263193	XP_003196315.1	400	16	222	332	400	69	47	57	68.1159	258	1.33e-25	hypothetical protein CGB_I4050C [Cryptococcus gattii WM276] >gi|317462790|gb|ADV24528.1| hypothetical protein CNJ02900 [Cryptococcus gattii WM276]
comp7303_c0	300	297610684	NP_001064898.2	1458	14	298	559	653	95	58	70	61.0526	297	2.78e-29	Os10g0485600 [Oryza sativa Japonica Group] >gi|18087887|gb|AAL59041.1|AC087182_24 putative RNA helicase [Oryza sativa Japonica Group] >gi|31432753|gb|AAP54346.1| Type III restriction enzyme, res subunit family protein, expressed [Oryza sativa Japonica Group] >gi|255679506|dbj|BAF26812.2| Os10g0485600 [Oryza sativa Japonica Group]
comp7329_c0	533	225424623	XP_002282288.1	182	1	477	26	182	159	79	116	49.6855	423	1.11e-49	PREDICTED: uncharacterized protein LOC100244057, partial [Vitis vinifera]
comp7332_c0	376	218186590	EEC69017.1	463	163	354	13	76	64	33	44	51.5625	170	2.33e-12	hypothetical protein OsI_37812 [Oryza sativa Indica Group]
comp7354_c0	497	359485399	XP_002274770.2	529	1	417	6	141	139	66	93	47.482	333	3.83e-34	PREDICTED: mitotic checkpoint serine/threonine-protein kinase BUB1-like [Vitis vinifera]
comp7359_c0	621	224073436	XP_002304095.1	1014	87	617	21	194	180	76	97	42.2222	208	2.78e-16	predicted protein [Populus trichocarpa] >gi|222841527|gb|EEE79074.1| predicted protein [Populus trichocarpa]
comp7370_c0	368	302141863	CBI19066.3	521	160	366	1	69	69	33	43	47.8261	169	3e-12	unnamed protein product [Vitis vinifera]
comp7379_c0	578	296082249	CBI21254.3	215	2	466	12	166	155	99	127	63.871	563	4.86e-70	unnamed protein product [Vitis vinifera]
comp7384_c0	409	113205216	AAT39281.2	1760	1	408	568	704	141	66	86	46.8085	272	2.73e-25	Integrase core domain containing protein [Solanum demissum]
comp7389_c0	543	255540959	XP_002511544.1	984	6	542	649	827	179	135	155	75.419	746	4.67e-90	abc transporter, putative [Ricinus communis] >gi|223550659|gb|EEF52146.1| abc transporter, putative [Ricinus communis]
comp7392_c0	279	326511343	BAJ87685.1	410	99	278	14	73	60	47	53	78.3333	263	5.55e-26	predicted protein [Hordeum vulgare subsp. vulgare]
comp7415_c0	378	392865689	EAS31497.2	154	1	282	61	154	94	79	86	84.0426	421	1.73e-50	superoxide dismutase [Cu-Zn] [Coccidioides immitis RS]
comp7445_c0	370	147798163	CAN71770.1	865	83	319	736	805	79	37	46	46.8354	149	1.88e-09	hypothetical protein VITISV_026210 [Vitis vinifera]
comp7475_c0	282	357144209	XP_003573211.1	460	5	277	43	133	91	75	81	82.4176	410	2.35e-46	PREDICTED: extended synaptotagmin-3-like isoform 2 [Brachypodium distachyon]
comp7477_c0	232	158939715	ABW84158.1	121	47	202	44	95	52	35	41	67.3077	184	6.5e-18	glyceraldehyde 3-phosphate dehydrogenase, partial [Ficus trachypison]
comp7512_c0	284	50838657	BAD34493.1	1298	2	283	500	593	94	79	89	84.0426	445	2.26e-49	Gag-Pol [Ipomoea batatas]
comp7528_c0	244	147828210	CAN71108.1	1354	79	243	694	748	55	35	40	63.6364	137	2.59e-08	hypothetical protein VITISV_001478 [Vitis vinifera]
comp7529_c0	1506	27764548	AAO23078.1	1552	3	1502	793	1285	500	264	353	52.8	1371	3.18e-171	polyprotein [Glycine max]
comp7558_c0	247	189189088	XP_001930883.1	232	27	245	23	95	73	56	64	76.7123	315	1.86e-34	elongation factor 1-beta [Pyrenophora tritici-repentis Pt-1C-BFP] >gi|187972489|gb|EDU39988.1| elongation factor 1-beta [Pyrenophora tritici-repentis Pt-1C-BFP]
comp7563_c0	545	326529343	BAK01065.1	1166	1	543	329	503	181	111	134	61.326	458	9.26e-50	predicted protein [Hordeum vulgare subsp. vulgare]
comp7575_c0	267	255564607	XP_002523298.1	330	3	266	22	110	89	67	77	75.2809	334	3e-36	calcium-transporting atpase 4, endoplasmic reticulum-type, putative [Ricinus communis] >gi|223537386|gb|EEF39014.1| calcium-transporting atpase 4, endoplasmic reticulum-type, putative [Ricinus communis]
comp7582_c0	345	339782128	AEK07905.1	666	1	345	517	636	120	64	78	53.3333	338	3.76e-35	pectin methylesterase [Allium cepa]
comp7595_c0	500	225448548	XP_002277114.1	265	110	469	145	264	120	90	105	75	399	3.36e-45	PREDICTED: ferritin-3, chloroplastic [Vitis vinifera] >gi|297736556|emb|CBI25427.3| unnamed protein product [Vitis vinifera]
comp7615_c0	333	149390390	YP_001294389.1	122	48	209	16	69	54	34	42	62.963	167	2.65e-13	ribosomal protein L14 [Dioscorea elephantipes] >gi|218546799|sp|A6MMP4.1|RK14_DIOEL RecName: Full=50S ribosomal protein L14, chloroplastic >gi|148668082|gb|ABR01466.1| ribosomal protein L14 [Dioscorea elephantipes]
comp7625_c0	207	147790213	CAN65603.1	491	4	207	75	142	68	54	59	79.4118	303	1.17e-31	hypothetical protein VITISV_021511 [Vitis vinifera]
comp7647_c0	334	260795061	XP_002592525.1	269	125	331	18	86	69	49	61	71.0145	216	1.97e-19	hypothetical protein BRAFLDRAFT_118946 [Branchiostoma floridae] >gi|229277745|gb|EEN48536.1| hypothetical protein BRAFLDRAFT_118946 [Branchiostoma floridae]
comp7666_c0	372	33341545	AAQ15193.1	206	1	372	48	168	124	61	85	49.1935	317	2.18e-34	resistance protein [Vitis vinifera]
comp7668_c0	391	340992633	EGS23188.1	917	245	391	868	916	49	43	47	87.7551	239	3.25e-21	putative plasma membrane protein [Chaetomium thermophilum var. thermophilum DSM 1495]
comp7682_c0	961	225424120	XP_002280147.1	403	29	961	50	391	342	236	273	69.0058	1214	1.39e-163	PREDICTED: myristoyl-acyl carrier protein thioesterase, chloroplastic [Vitis vinifera]
comp7689_c0	1341	297744965	CBI38557.3	469	142	1341	7	418	416	237	300	56.9712	1244	3.19e-165	unnamed protein product [Vitis vinifera]
comp7727_c0	530	396460346	XP_003834785.1	198	1	405	64	198	135	89	103	65.9259	490	1.87e-59	predicted protein [Leptosphaeria maculans JN3] >gi|312211335|emb|CBX91420.1| predicted protein [Leptosphaeria maculans JN3]
comp7776_c0	365	398397675	XP_003852295.1	536	106	363	444	529	86	61	71	70.9302	344	2.2e-36	hypothetical protein MYCGRDRAFT_72460 [Mycosphaerella graminicola IPO323] >gi|339472176|gb|EGP87271.1| hypothetical protein MYCGRDRAFT_72460 [Mycosphaerella graminicola IPO323]
comp7813_c0	218	255572971	XP_002527416.1	762	5	214	2	71	70	46	56	65.7143	256	2.02e-24	phospholipase d, putative [Ricinus communis] >gi|223533226|gb|EEF34982.1| phospholipase d, putative [Ricinus communis]
comp7815_c0	403	225451412	XP_002273469.1	994	2	403	670	798	134	69	88	51.4925	277	2.99e-26	PREDICTED: receptor-like protein 12 [Vitis vinifera]
comp7818_c0	680	58258761	XP_566793.1	358	2	559	172	357	186	178	183	95.6989	970	5.58e-129	glutamate-ammonia ligase [Cryptococcus neoformans var. neoformans JEC21] >gi|58258763|ref|XP_566794.1| glutamate-ammonia ligase [Cryptococcus neoformans var. neoformans JEC21] >gi|134106819|ref|XP_777951.1| hypothetical protein CNBA4200 [Cryptococcus neoformans var. neoformans B-3501A] >gi|338818192|sp|P0CN85.1|GLNA_CRYNB RecName: Full=Glutamine synthetase; Short=GS; AltName: Full=Glutamate--ammo…
comp7819_c0	254	125588087	EAZ28751.1	698	1	252	180	263	84	55	70	65.4762	291	3.62e-29	hypothetical protein OsJ_12773 [Oryza sativa Japonica Group]
comp7823_c0	525	224144490	XP_002336153.1	203	3	524	38	185	178	83	104	46.6292	297	9.71e-31	predicted protein [Populus trichocarpa] >gi|222874439|gb|EEF11570.1| predicted protein [Populus trichocarpa]
comp7851_c0	381	147768195	CAN71648.1	374	4	381	202	327	126	82	101	65.0794	449	4.24e-52	hypothetical protein VITISV_015504 [Vitis vinifera]
comp7887_c0	247	297802022	XP_002868895.1	100	1	213	32	100	71	37	54	52.1127	193	9.07e-18	DNA binding protein [Arabidopsis lyrata subsp. lyrata] >gi|297314731|gb|EFH45154.1| DNA binding protein [Arabidopsis lyrata subsp. lyrata]
comp7888_c0	527	224036049	ACN37100.1	345	2	526	29	204	176	120	145	68.1818	642	2.02e-80	unknown [Zea mays]
comp7890_c0	431	1351856	P49608.1	898	77	259	224	284	61	52	53	85.2459	266	8.97e-49	RecName: Full=Aconitate hydratase, cytoplasmic; Short=Aconitase; AltName: Full=Citrate hydro-lyase >gi|7437043|pir||T10101 aconitate hydratase (EC 4.2.1.3) - cucurbit >gi|868003|dbj|BAA06108.1| aconitase [Cucurbita cv. Kurokawa Amakuri]
comp7909_c0	436	45190496	NP_984750.1	348	1	435	150	307	158	92	103	58.2278	313	2.9e-32	AEL111Cp [Ashbya gossypii ATCC 10895] >gi|44983438|gb|AAS52574.1| AEL111Cp [Ashbya gossypii ATCC 10895] >gi|374107969|gb|AEY96876.1| FAEL111Cp [Ashbya gossypii FDAG1]
comp7928_c0	321	147787383	CAN62337.1	590	88	291	342	409	68	50	57	73.5294	271	3.98e-26	hypothetical protein VITISV_004299 [Vitis vinifera]
comp7932_c0	355	29028306	AAO62313.1	480	3	353	301	417	117	109	115	93.1624	602	5.93e-74	UDP-glucose dehydrogenase [Colocasia esculenta]
comp7950_c0	607	392579449	EIW72576.1	378	103	330	238	313	76	51	61	67.1053	216	3.57e-18	hypothetical protein TREMEDRAFT_70756 [Tremella mesenterica DSM 1558]
comp7980_c0	512	326517974	BAK07239.1	703	3	200	547	612	66	24	44	36.3636	133	5.81e-12	predicted protein [Hordeum vulgare subsp. vulgare] >gi|326531036|dbj|BAK04869.1| predicted protein [Hordeum vulgare subsp. vulgare]
comp8021_c0	327	147866928	CAN83060.1	591	101	325	521	590	76	48	56	63.1579	232	8.12e-21	hypothetical protein VITISV_010305 [Vitis vinifera]
comp8050_c0	529	301113788	XP_002998664.1	239	284	520	28	107	81	29	46	35.8025	138	3.42e-08	hypothetical protein PITG_06571 [Phytophthora infestans T30-4] >gi|262111965|gb|EEY70017.1| hypothetical protein PITG_06571 [Phytophthora infestans T30-4]
comp8069_c0	681	356535020	XP_003536047.1	202	24	458	47	183	145	49	84	33.7931	223	1.38e-19	PREDICTED: uncharacterized protein LOC100787534 [Glycine max]
comp8079_c0	417	321250222	XP_003191732.1	316	105	407	14	119	106	58	71	54.717	250	1.02e-23	hypothetical protein CGB_A8200C [Cryptococcus gattii WM276] >gi|317458199|gb|ADV19945.1| Hypothetical protein CGB_A8200C [Cryptococcus gattii WM276]
comp8084_c0	277	357129710	XP_003566504.1	858	3	275	634	724	91	50	64	54.9451	283	1.03e-27	PREDICTED: uncharacterized protein LOC100836442 [Brachypodium distachyon]
comp8089_c0	236	147789988	CAN71759.1	1472	73	225	479	529	51	32	43	62.7451	192	2.15e-19	hypothetical protein VITISV_020777 [Vitis vinifera]
comp8126_c0	393	356507606	XP_003522555.1	455	9	269	241	329	89	55	69	61.7978	273	8.01e-35	PREDICTED: serine carboxypeptidase-like 42-like [Glycine max]
comp8157_c0	511	38256990	BAD01561.1	174	3	332	64	173	110	84	99	76.3636	473	1.86e-57	flowering locus T [Populus nigra] >gi|41351511|dbj|BAD08337.1| flowering locus T [Populus nigra] >gi|169990902|dbj|BAG12900.1| FLOWERING LOCUS T [Populus nigra]
comp8203_c0	218	321248659	XP_003191195.1	77	62	217	21	72	52	34	41	65.3846	188	2.37e-17	hypothetical protein CGB_A1600W [Cryptococcus gattii WM276] >gi|317457662|gb|ADV19408.1| Hypothetical protein CGB_A1600W [Cryptococcus gattii WM276]
comp8211_c0	898	225445761	XP_002272592.1	248	129	887	1	247	253	158	199	62.4506	822	5.78e-107	PREDICTED: putative glutamine amidotransferase YLR126C [Vitis vinifera] >gi|297743705|emb|CBI36588.3| unnamed protein product [Vitis vinifera]
comp8252_c0	263	398407735	XP_003855333.1	296	18	260	17	102	88	47	52	53.4091	119	2.61e-06	hypothetical protein MYCGRDRAFT_108290 [Mycosphaerella graminicola IPO323] >gi|339475217|gb|EGP90309.1| hypothetical protein MYCGRDRAFT_108290 [Mycosphaerella graminicola IPO323]
comp8304_c0	297	224123398	XP_002330305.1	525	2	295	372	469	99	60	79	60.6061	357	1.44e-38	cytochrome P450 [Populus trichocarpa] >gi|222871340|gb|EEF08471.1| cytochrome P450 [Populus trichocarpa]
comp8307_c0	457	224107463	XP_002314488.1	716	2	457	391	545	156	95	127	60.8974	533	1.55e-61	predicted protein [Populus trichocarpa] >gi|222863528|gb|EEF00659.1| predicted protein [Populus trichocarpa]
comp8311_c0	406	321260106	XP_003194773.1	540	2	406	34	168	135	124	131	91.8519	637	2.96e-78	ATP synthase alpha chain, mitochondrial precursor [Cryptococcus gattii WM276] >gi|317461245|gb|ADV22986.1| ATP synthase alpha chain, mitochondrial precursor, putative [Cryptococcus gattii WM276]
comp8321_c0	815	357129225	XP_003566266.1	864	24	815	121	365	264	163	207	61.7424	882	4.39e-109	PREDICTED: uncharacterized protein LOC100824176 [Brachypodium distachyon]
comp8333_c0	467	332313329	D9HP26.1	157	163	465	48	150	103	61	75	59.2233	331	1.54e-36	RecName: Full=Cell number regulator 10; AltName: Full=ZmCNR10 >gi|297614172|gb|ADI48424.1| cell number regulator 10 [Zea mays]
comp8348_c0	372	170113392	XP_001887896.1	253	7	288	150	244	95	57	70	60	294	1.62e-30	predicted protein [Laccaria bicolor S238N-H82] >gi|164637257|gb|EDR01544.1| predicted protein [Laccaria bicolor S238N-H82]
comp8353_c0	228	357521203	XP_003630890.1	500	5	226	10	86	80	30	46	37.5	126	4.54e-07	Pectinesterase [Medicago truncatula] >gi|355524912|gb|AET05366.1| Pectinesterase [Medicago truncatula]
comp8356_c0	478	170087260	XP_001874853.1	595	1	474	294	452	161	104	125	64.5963	517	8.59e-60	glycoside hydrolase family 5 protein [Laccaria bicolor S238N-H82] >gi|164650053|gb|EDR14294.1| glycoside hydrolase family 5 protein [Laccaria bicolor S238N-H82]
comp8360_c0	612	225464408	XP_002269135.1	226	39	551	1	180	188	92	119	48.9362	351	5.09e-38	PREDICTED: uncharacterized protein LOC100244711 [Vitis vinifera] >gi|296084462|emb|CBI25021.3| unnamed protein product [Vitis vinifera]
comp8388_c0	397	147859411	CAN79264.1	1360	3	395	915	1045	131	101	114	77.0992	560	3.21e-64	hypothetical protein VITISV_034881 [Vitis vinifera]
comp8389_c0	407	293335075	NP_001167848.1	264	185	406	177	250	74	43	51	58.1081	184	8.63e-15	uncharacterized protein LOC100381550 [Zea mays] >gi|223944409|gb|ACN26288.1| unknown [Zea mays]
comp8419_c0	208	297737559	CBI26760.3	641	3	206	518	580	68	38	53	55.8824	140	5.34e-09	unnamed protein product [Vitis vinifera]
comp8430_c0	381	398397719	XP_003852317.1	681	3	335	26	139	115	104	108	90.4348	518	4.96e-60	Hsp70 family protein [Mycosphaerella graminicola IPO323] >gi|339472198|gb|EGP87293.1| hypothetical protein MYCGRDRAFT_104628 [Mycosphaerella graminicola IPO323]
comp8450_c0	339	297735174	CBI17536.3	279	88	252	144	198	55	39	48	70.9091	151	2.18e-10	unnamed protein product [Vitis vinifera]
comp8452_c0	562	147784740	CAN74796.1	557	192	560	435	557	123	106	112	86.1789	578	1.48e-68	hypothetical protein VITISV_000290 [Vitis vinifera]
comp8464_c0	533	242072494	XP_002446183.1	1080	2	532	395	571	177	107	133	60.452	434	1.12e-46	hypothetical protein SORBIDRAFT_06g003140 [Sorghum bicolor] >gi|241937366|gb|EES10511.1| hypothetical protein SORBIDRAFT_06g003140 [Sorghum bicolor]
comp8477_c0	608	224122062	XP_002330531.1	1193	2	607	702	896	202	133	155	65.8416	619	2.05e-71	predicted protein [Populus trichocarpa] >gi|222872089|gb|EEF09220.1| predicted protein [Populus trichocarpa]
comp8482_c0	488	297736893	CBI26094.3	385	151	483	27	135	111	66	72	59.4595	290	1.31e-28	unnamed protein product [Vitis vinifera]
comp8497_c0	291	147804663	CAN62382.1	688	37	240	409	477	71	46	51	64.7887	201	1.01e-16	hypothetical protein VITISV_037851 [Vitis vinifera]
comp8535_c0	328	321259856	XP_003194648.1	529	1	327	105	213	109	95	103	87.156	526	2.1e-62	C-22 sterol desaturase [Cryptococcus gattii WM276] >gi|317461120|gb|ADV22861.1| C-22 sterol desaturase, putative [Cryptococcus gattii WM276]
comp8566_c0	258	359477007	XP_003631927.1	125	1	231	23	115	94	36	50	38.2979	128	3.55e-08	PREDICTED: uncharacterized protein LOC100854263 [Vitis vinifera]
comp8567_c0	403	296083854	CBI24242.3	604	2	397	56	191	136	91	106	66.9118	355	1.74e-37	unnamed protein product [Vitis vinifera]
comp8582_c0	253	58262482	XP_568651.1	744	17	253	668	744	79	58	67	73.4177	277	3.92e-27	heat shock protein [Cryptococcus neoformans var. neoformans JEC21] >gi|134118962|ref|XP_771984.1| hypothetical protein CNBN1630 [Cryptococcus neoformans var. neoformans B-3501A] >gi|50254588|gb|EAL17337.1| hypothetical protein CNBN1630 [Cryptococcus neoformans var. neoformans B-3501A] >gi|57230825|gb|AAW47134.1| heat shock protein, putative [Cryptococcus neoformans var. neoformans JEC21]
comp8594_c0	320	13489188	AAK27822.1	1720	2	310	1264	1370	108	37	57	34.2593	144	7.44e-09	putative gag-pol precursor [Oryza sativa Japonica Group]
comp8598_c0	645	357162522	XP_003579438.1	955	507	644	370	415	46	27	37	58.6957	158	6.07e-10	PREDICTED: auxin response factor 11-like [Brachypodium distachyon]
comp8604_c0	361	342881701	EGU82534.1	288	62	361	151	254	104	62	77	59.6154	312	7.33e-33	hypothetical protein FOXB_06950 [Fusarium oxysporum Fo5176]
comp8613_c0	420	357162602	XP_003579462.1	1057	4	417	340	477	138	81	108	58.6957	353	2.47e-36	PREDICTED: phytosulfokine receptor 1-like [Brachypodium distachyon]
comp8631_c0	338	224105743	XP_002333773.1	414	56	193	21	66	46	29	36	63.0435	151	4.11e-10	predicted protein [Populus trichocarpa] >gi|222838457|gb|EEE76822.1| predicted protein [Populus trichocarpa]
comp8645_c0	275	297734497	CBI15744.3	873	170	274	835	869	35	29	32	82.8571	146	1.84e-09	unnamed protein product [Vitis vinifera]
comp8654_c0	742	398407131	XP_003855031.1	186	162	719	1	186	186	156	168	83.871	844	5.01e-112	60S ribosomal protein L17 [Mycosphaerella graminicola IPO323] >gi|339474915|gb|EGP90007.1| hypothetical protein MYCGRDRAFT_103329 [Mycosphaerella graminicola IPO323]
comp8656_c0	221	298508754	3N8E	182	7	219	59	129	71	58	65	81.6901	309	2.83e-34	Chain A, Substrate Binding Domain Of The Human Heat Shock 70kda Prote (Mortalin) >gi|298508755|pdb|3N8E|B Chain B, Substrate Binding Domain Of The Human Heat Shock 70kda Prote (Mortalin)
comp8660_c0	275	378730170	EHY56629.1	71	44	256	1	71	71	62	67	87.3239	236	2.48e-24	hypothetical protein HMPREF1120_04704 [Exophiala dermatitidis NIH/UT8656]
comp8662_c0	203	398410372	XP_003856539.1	234	2	175	117	172	61	42	45	68.8525	170	6.28e-14	hypothetical protein MYCGRDRAFT_102725 [Mycosphaerella graminicola IPO323] >gi|339476424|gb|EGP91515.1| hypothetical protein MYCGRDRAFT_102725 [Mycosphaerella graminicola IPO323]
comp8695_c0	493	326503140	BAJ99195.1	790	1	492	361	524	164	153	161	93.2927	836	1.05e-104	predicted protein [Hordeum vulgare subsp. vulgare]
comp8698_c0	594	225435524	XP_002283009.1	462	217	594	143	262	126	68	87	53.9683	361	1.05e-37	PREDICTED: uncharacterized protein LOC100243206 [Vitis vinifera]
comp8701_c0	414	224065637	XP_002301896.1	158	336	413	9	34	26	25	26	96.1538	137	8.54e-09	predicted protein [Populus trichocarpa] >gi|222843622|gb|EEE81169.1| predicted protein [Populus trichocarpa]
comp8710_c0	318	326934658	XP_003213403.1	237	1	318	96	201	106	100	102	94.3396	537	2.78e-67	PREDICTED: ATP synthase subunit alpha, mitochondrial-like, partial [Meleagris gallopavo]
comp8712_c0	728	225425890	XP_002270903.1	207	2	622	1	207	207	189	200	91.3043	1023	6.4e-139	PREDICTED: mitotic spindle checkpoint protein MAD2 isoform 1 [Vitis vinifera] >gi|297738345|emb|CBI27546.3| unnamed protein product [Vitis vinifera]
comp8735_c0	222	398390764	XP_003848842.1	412	1	216	1	72	72	53	58	73.6111	272	1.76e-27	beta ketoadipyl CoA thiolase [Mycosphaerella graminicola IPO323] >gi|339468718|gb|EGP83818.1| beta ketoadipyl CoA thiolase [Mycosphaerella graminicola IPO323]
comp8737_c0	378	398389789	XP_003848355.1	125	249	377	81	123	43	39	40	90.6977	130	4.52e-08	40S ribosomal protein S26 [Mycosphaerella graminicola IPO323] >gi|339468230|gb|EGP83331.1| hypothetical protein MYCGRDRAFT_106114 [Mycosphaerella graminicola IPO323]
comp8741_c0	383	321260100	XP_003194770.1	2237	1	381	1980	2106	127	109	115	85.8268	488	3.02e-54	acetyl-CoA carboxylase [Cryptococcus gattii WM276] >gi|317461242|gb|ADV22983.1| Acetyl-CoA carboxylase, putative [Cryptococcus gattii WM276]
comp8753_c0	280	392573169	EIW66310.1	167	140	280	31	77	47	31	36	65.9574	174	2.36e-14	hypothetical protein TREMEDRAFT_74789 [Tremella mesenterica DSM 1558]
comp8762_c0	575	84316678	ABC55715.1	498	2	565	80	267	188	126	158	67.0213	726	6.69e-91	beta-mannosidase 4 [Oncidium Gower Ramsey]
comp8791_c0	207	390600236	EIN09631.1	247	17	205	63	124	63	44	48	69.8413	179	4.19e-15	hypothetical protein PUNSTDRAFT_143126 [Punctularia strigosozonata HHB-11173 SS5]
comp8792_c0	984	225465113	XP_002270446.1	1230	2	982	415	728	330	203	253	61.5152	1066	4.1e-132	PREDICTED: putative phospholipid-transporting ATPase 5-like [Vitis vinifera]
comp8844_c0	513	398389975	XP_003848448.1	102	185	478	1	102	102	46	65	45.098	140	2.81e-09	hypothetical protein MYCGRDRAFT_106214 [Mycosphaerella graminicola IPO323] >gi|339468323|gb|EGP83424.1| hypothetical protein MYCGRDRAFT_106214 [Mycosphaerella graminicola IPO323]
comp8846_c0	238	147801304	CAN74843.1	1296	2	229	155	230	76	30	48	39.4737	173	4.58e-13	hypothetical protein VITISV_037042 [Vitis vinifera]
comp8872_c0	293	40644190	CAC95126.1	1382	96	266	1324	1380	57	23	32	40.3509	103	3.82e-07	gag-pol polyprotein [Populus deltoides]
comp8875_c0	425	194704574	ACF86371.1	595	2	424	176	316	141	70	98	49.6454	378	1.17e-40	unknown [Zea mays]
comp8886_c0	345	10140673	AAG13508.1	1608	3	344	1020	1130	114	46	63	40.3509	191	5.63e-15	putative gag-pol polyprotein [Oryza sativa Japonica Group]
comp8911_c0	365	242076906	XP_002448389.1	124	3	362	9	120	120	67	86	55.8333	358	1.67e-41	hypothetical protein SORBIDRAFT_06g026390 [Sorghum bicolor] >gi|241939572|gb|EES12717.1| hypothetical protein SORBIDRAFT_06g026390 [Sorghum bicolor]
comp8923_c0	204	398398241	XP_003852578.1	276	82	204	236	276	41	33	39	80.4878	171	6.9e-14	hypothetical protein MYCGRDRAFT_42411 [Mycosphaerella graminicola IPO323] >gi|339472459|gb|EGP87554.1| hypothetical protein MYCGRDRAFT_42411 [Mycosphaerella graminicola IPO323]
comp8926_c0	226	189205889	XP_001939279.1	384	2	175	33	90	58	52	55	89.6552	301	1.51e-31	alcohol dehydrogenase 1 [Pyrenophora tritici-repentis Pt-1C-BFP] >gi|187975372|gb|EDU41998.1| alcohol dehydrogenase 1 [Pyrenophora tritici-repentis Pt-1C-BFP]
comp8953_c0	1464	398410612	XP_003856654.1	285	861	1241	26	155	130	75	92	57.6923	340	1.86e-33	hypothetical protein MYCGRDRAFT_102849 [Mycosphaerella graminicola IPO323] >gi|339476539|gb|EGP91630.1| hypothetical protein MYCGRDRAFT_102849 [Mycosphaerella graminicola IPO323]
comp8954_c0	296	224078748	XP_002305613.1	260	8	223	1	71	72	38	54	52.7778	219	4.05e-20	predicted protein [Populus trichocarpa] >gi|222848577|gb|EEE86124.1| predicted protein [Populus trichocarpa]
comp8969_c0	325	224129480	XP_002328727.1	743	43	321	289	381	93	60	79	64.5161	283	1.57e-27	Cl-channel clc-7 [Populus trichocarpa] >gi|222839025|gb|EEE77376.1| Cl-channel clc-7 [Populus trichocarpa]
comp8973_c0	794	297742784	CBI35464.3	225	86	634	48	225	184	82	112	44.5652	410	6.01e-46	unnamed protein product [Vitis vinifera]
comp8976_c0	488	321250245	XP_003191742.1	401	2	385	1	127	128	108	122	84.375	587	9.08e-72	translation initiation factor [Cryptococcus gattii WM276] >gi|317458209|gb|ADV19955.1| Translation initiation factor, putative [Cryptococcus gattii WM276]
comp8988_c0	376	359479587	XP_003632297.1	752	12	374	488	608	121	77	98	63.6364	423	1.12e-46	PREDICTED: uncharacterized protein LOC100261309 [Vitis vinifera]
comp8989_c0	205	224105895	XP_002333753.1	963	7	204	394	457	66	31	44	46.9697	138	1.13e-08	predicted protein [Populus trichocarpa] >gi|222838401|gb|EEE76766.1| predicted protein [Populus trichocarpa]
comp8993_c0	426	154300984	XP_001550906.1	403	31	426	109	240	132	70	92	53.0303	367	1.22e-39	hypothetical protein BC1G_10630 [Botryotinia fuckeliana B05.10] >gi|150856378|gb|EDN31570.1| hypothetical protein BC1G_10630 [Botryotinia fuckeliana B05.10] >gi|347831150|emb|CCD46847.1| hypothetical protein [Botryotinia fuckeliana]
comp8998_c0	945	359476838	XP_002266706.2	358	55	942	12	305	303	162	203	53.4653	783	2.36e-99	PREDICTED: NAC domain-containing protein 7-like [Vitis vinifera]
comp9030_c0	304	396582343	AFN88207.1	1387	3	302	1079	1177	100	59	72	59	276	2e-26	integrase core domain containing protein [Phaseolus vulgaris]
comp9052_c0	594	398411421	XP_003857049.1	199	60	593	23	199	178	158	165	88.764	818	9.47e-109	40S ribosomal protein S8 [Mycosphaerella graminicola IPO323] >gi|339476934|gb|EGP92025.1| hypothetical protein MYCGRDRAFT_67117 [Mycosphaerella graminicola IPO323]
comp9054_c0	311	296083682	CBI23671.3	631	2	232	1	74	77	46	50	59.7403	211	5.33e-18	unnamed protein product [Vitis vinifera]
comp9059_c0	204	224085435	XP_002335284.1	164	3	203	63	135	74	30	41	40.5405	126	4.11e-08	predicted protein [Populus trichocarpa] >gi|222833219|gb|EEE71696.1| predicted protein [Populus trichocarpa]
comp9084_c0	211	398397441	XP_003852178.1	291	2	190	229	291	63	56	58	88.8889	289	2.39e-30	hypothetical protein MYCGRDRAFT_72064 [Mycosphaerella graminicola IPO323] >gi|339472059|gb|EGP87154.1| hypothetical protein MYCGRDRAFT_72064 [Mycosphaerella graminicola IPO323]
comp9114_c0	1642	330930428	XP_003303028.1	285	647	1453	1	285	285	215	235	75.4386	1082	5.84e-142	hypothetical protein PTT_15051 [Pyrenophora teres f. teres 0-1] >gi|311321250|gb|EFQ88863.1| hypothetical protein PTT_15051 [Pyrenophora teres f. teres 0-1]
comp9119_c0	475	189210307	XP_001941485.1	389	1	471	90	246	157	120	135	76.4331	652	8.4e-82	mannitol-1-phosphate 5-dehydrogenase [Pyrenophora tritici-repentis Pt-1C-BFP] >gi|229891117|sp|B2WME4.1|MTLD_PYRTR RecName: Full=Mannitol-1-phosphate 5-dehydrogenase; Short=M1PDH; Short=MPD; Short=MPDH >gi|187977578|gb|EDU44204.1| mannitol-1-phosphate 5-dehydrogenase [Pyrenophora tritici-repentis Pt-1C-BFP]
comp9126_c0	232	58266492	XP_570402.1	687	2	196	5	69	65	55	60	84.6154	204	2.13e-17	hypothetical protein [Cryptococcus neoformans var. neoformans JEC21] >gi|134111330|ref|XP_775807.1| hypothetical protein CNBD5360 [Cryptococcus neoformans var. neoformans B-3501A] >gi|50258471|gb|EAL21160.1| hypothetical protein CNBD5360 [Cryptococcus neoformans var. neoformans B-3501A] >gi|57226635|gb|AAW43095.1| conserved hypothetical protein [Cryptococcus neoformans var. neoformans JEC21]
comp9128_c0	309	90265100	CAH67713.1	1454	33	308	303	404	103	43	52	41.7476	177	3.18e-13	H0512B01.8 [Oryza sativa Indica Group]
comp9133_c0	275	367046236	XP_003653498.1	1061	1	273	918	1008	91	80	86	87.9121	457	3.45e-51	hypothetical protein THITE_2115984 [Thielavia terrestris NRRL 8126] >gi|347000760|gb|AEO67162.1| hypothetical protein THITE_2115984 [Thielavia terrestris NRRL 8126]
comp9155_c0	323	121501704	ABM55245.1	1399	50	307	153	240	88	54	68	61.3636	263	1.14e-24	transposon-like protein [Beta vulgaris]
comp9157_c0	259	297795617	XP_002865693.1	640	2	259	161	274	114	48	60	42.1053	175	1.92e-13	pentatricopeptide repeat-containing protein [Arabidopsis lyrata subsp. lyrata] >gi|297311528|gb|EFH41952.1| pentatricopeptide repeat-containing protein [Arabidopsis lyrata subsp. lyrata]
comp9168_c0	273	30698516	BAC76606.1	523	19	273	12	112	101	73	82	72.2772	388	5.9e-43	putative high affinity nitrate transporter [Phragmites australis]
comp9175_c0	939	147822656	CAN70540.1	683	3	938	186	497	312	236	272	75.641	1310	2.44e-174	hypothetical protein VITISV_034183 [Vitis vinifera]
comp9192_c0	486	255559641	XP_002520840.1	209	64	456	71	202	138	68	85	49.2754	302	1.48e-31	DNA binding protein, putative [Ricinus communis] >gi|223539971|gb|EEF41549.1| DNA binding protein, putative [Ricinus communis]
comp9199_c0	571	242058571	XP_002458431.1	785	3	569	225	414	190	141	164	74.2105	749	1.43e-91	hypothetical protein SORBIDRAFT_03g033440 [Sorghum bicolor] >gi|241930406|gb|EES03551.1| hypothetical protein SORBIDRAFT_03g033440 [Sorghum bicolor]
comp9209_c0	203	335345898	AEH41529.1	320	91	180	1	30	30	26	29	86.6667	137	5.97e-09	ADP,ATP carrier protein [Endocarpon pusillum]
comp9257_c0	504	169866859	XP_001840014.1	367	135	359	1	95	97	44	60	45.3608	144	8.82e-09	hypothetical protein CC1G_10398 [Coprinopsis cinerea okayama7#130] >gi|116498900|gb|EAU81795.1| hypothetical protein CC1G_10398 [Coprinopsis cinerea okayama7#130]
comp9261_c0	279	359479937	XP_002269588.2	787	84	275	82	145	64	29	39	45.3125	125	1.26e-06	PREDICTED: uncharacterized protein LOC100257206 [Vitis vinifera]
comp9264_c0	286	189194978	XP_001933827.1	262	22	276	1	85	85	46	56	54.1176	179	1.01e-14	mitochondrial hypoxia responsive domain containing protein [Pyrenophora tritici-repentis Pt-1C-BFP] >gi|187979706|gb|EDU46332.1| mitochondrial hypoxia responsive domain containing protein [Pyrenophora tritici-repentis Pt-1C-BFP]
comp9265_c0	536	189191456	XP_001932067.1	383	3	443	1	147	147	112	128	76.1905	625	1.91e-77	glutamine synthetase [Pyrenophora tritici-repentis Pt-1C-BFP] >gi|187973673|gb|EDU41172.1| glutamine synthetase [Pyrenophora tritici-repentis Pt-1C-BFP]
comp9279_c0	326	104294980	ABF71996.1	292	3	242	184	263	80	62	68	77.5	353	4.59e-39	oxidoreductase, 2OG-Fe(II) oxygenase family protein [Musa acuminata]
comp9283_c0	320	71024555	XP_762507.1	126	3	245	1	81	81	76	79	93.8272	413	6e-50	hypothetical protein UM06360.1 [Ustilago maydis 521] >gi|74698783|sp|Q4P0K3.1|SNU13_USTMA RecName: Full=13 kDa ribonucleoprotein-associated protein >gi|46101984|gb|EAK87217.1| conserved hypothetical protein [Ustilago maydis 521] >gi|343428021|emb|CBQ71545.1| probable SNU13-component of the U4/U6.U5 snRNP [Sporisorium reilianum SRZ2]
comp9290_c0	431	242066848	XP_002454713.1	729	3	431	66	208	143	124	136	86.7133	671	2.1e-81	hypothetical protein SORBIDRAFT_04g036050 [Sorghum bicolor] >gi|241934544|gb|EES07689.1| hypothetical protein SORBIDRAFT_04g036050 [Sorghum bicolor]
comp9318_c0	326	297800340	XP_002868054.1	335	76	324	24	110	87	43	53	49.4253	171	4.61e-13	predicted protein [Arabidopsis lyrata subsp. lyrata] >gi|297313890|gb|EFH44313.1| predicted protein [Arabidopsis lyrata subsp. lyrata]
comp9325_c0	230	224121262	XP_002318539.1	964	55	228	632	690	59	37	48	62.7119	191	1.27e-15	predicted protein [Populus trichocarpa] >gi|222859212|gb|EEE96759.1| predicted protein [Populus trichocarpa]
comp9327_c0	507	40716489	AAR88782.1	109	2	310	7	109	103	93	98	90.2913	504	6.47e-63	putative phragmoplastin 5 [Musa acuminata AAA Group]
comp9342_c0	280	297721275	NP_001173000.1	217	1	276	42	133	92	77	85	83.6957	417	1.21e-49	Os02g0528900 [Oryza sativa Japonica Group] >gi|255670961|dbj|BAH91729.1| Os02g0528900 [Oryza sativa Japonica Group]
comp9345_c0	479	255550848	XP_002516472.1	492	195	479	398	492	95	66	81	69.4737	395	6.25e-43	Vacuolar-processing enzyme precursor, putative [Ricinus communis] >gi|223544292|gb|EEF45813.1| Vacuolar-processing enzyme precursor, putative [Ricinus communis]
comp9373_c0	308	255578803	XP_002530258.1	273	1	153	219	269	51	25	34	49.0196	127	2.65e-07	conserved hypothetical protein [Ricinus communis] >gi|223530224|gb|EEF32128.1| conserved hypothetical protein [Ricinus communis]
comp9388_c0	388	154091376	ABS57488.1	575	4	387	99	226	128	107	121	83.5938	533	1.03e-62	putative amino acid permease [Mycosphaerella pini]
comp9397_c0	501	212276286	NP_001130342.1	465	111	404	353	450	98	42	58	42.8571	200	5.65e-16	uncharacterized protein LOC100191437 [Zea mays] >gi|194688890|gb|ACF78529.1| unknown [Zea mays]
comp9409_c0	500	4539357	CAB40051.1	1294	68	481	707	841	138	40	70	28.9855	163	7.76e-11	putative protein [Arabidopsis thaliana] >gi|7267781|emb|CAB81184.1| putative protein [Arabidopsis thaliana]
comp9430_c0	354	255639381	ACU19986.1	223	2	352	41	157	117	91	108	77.7778	421	8.93e-50	unknown [Glycine max]
comp9442_c0	205	224134539	XP_002327429.1	759	3	203	185	251	67	45	56	67.1642	269	2.5e-26	predicted protein [Populus trichocarpa] >gi|222835983|gb|EEE74404.1| predicted protein [Populus trichocarpa]
comp9474_c0	455	115451575	NP_001049388.1	336	116	397	159	252	94	46	75	48.9362	248	4.07e-23	Os03g0216900 [Oryza sativa Japonica Group] >gi|108706859|gb|ABF94654.1| expressed protein [Oryza sativa Japonica Group] >gi|113547859|dbj|BAF11302.1| Os03g0216900 [Oryza sativa Japonica Group] >gi|215707091|dbj|BAG93551.1| unnamed protein product [Oryza sativa Japonica Group]
comp9484_c0	641	58268384	XP_571348.1	506	3	569	1	191	191	145	164	75.9162	796	4.99e-101	aldehyde dehydrogenase (alddh) [Cryptococcus neoformans var. neoformans JEC21] >gi|134112772|ref|XP_774929.1| hypothetical protein CNBF0940 [Cryptococcus neoformans var. neoformans B-3501A] >gi|50257577|gb|EAL20282.1| hypothetical protein CNBF0940 [Cryptococcus neoformans var. neoformans B-3501A] >gi|57227583|gb|AAW44041.1| aldehyde dehydrogenase (alddh), putative [Cryptococcus neoformans var. ne…
comp9585_c0	470	212539291	XP_002149801.1	497	1	468	162	317	156	119	136	76.2821	673	1.12e-83	conserved hypothetical protein [Penicillium marneffei ATCC 18224] >gi|210069543|gb|EEA23634.1| conserved hypothetical protein [Penicillium marneffei ATCC 18224]
comp9594_c0	255	396481754	XP_003841315.1	583	6	254	438	520	83	56	70	67.4699	296	4.28e-30	hypothetical protein LEMA_P092450.1 [Leptosphaeria maculans JN3] >gi|312217889|emb|CBX97836.1| hypothetical protein LEMA_P092450.1 [Leptosphaeria maculans JN3]
comp9623_c0	202	350633689	EHA22054.1	169	3	200	28	93	66	58	64	87.8788	314	2.4e-35	hypothetical protein ASPNIDRAFT_127402 [Aspergillus niger ATCC 1015]
comp9644_c0	329	89179365	ABD63103.1	307	4	327	178	283	109	46	62	42.2018	193	2.6e-16	gag-pol polyprotein, related [Asparagus officinalis]
comp9668_c0	296	398390177	XP_003848549.1	582	2	295	174	272	99	81	91	81.8182	422	2.41e-47	glycoside hydrolase family 32 protein [Mycosphaerella graminicola IPO323] >gi|339468424|gb|EGP83525.1| putative beta-Fructofuranosidase [Mycosphaerella graminicola IPO323]
comp9680_c0	227	147819922	CAN69382.1	484	3	224	389	461	74	48	57	64.8649	273	2.35e-27	hypothetical protein VITISV_016612 [Vitis vinifera]
comp9735_c0	201	60543060	BAD90779.1	136	1	120	1	40	40	40	40	100	196	4.96e-18	histone 3 [Conocephalum conicum]
comp9774_c0	299	122230890	Q10SC8.1	456	1	297	81	179	99	78	90	78.7879	427	9.09e-49	RecName: Full=CBL-interacting protein kinase 9; AltName: Full=OsCIPK09 >gi|108705966|gb|ABF93761.1| CIPK-like protein 1, putative, expressed [Oryza sativa Japonica Group] >gi|222624124|gb|EEE58256.1| hypothetical protein OsJ_09250 [Oryza sativa Japonica Group]
comp9815_c0	281	227016415	ACP18669.1	149	27	209	53	113	61	52	60	85.2459	284	1.29e-30	barren stalk1-like protein [Leymus cinereus]
comp9879_c0	225	196011958	XP_002115842.1	147	1	183	26	86	61	41	53	67.2131	239	3.8e-24	conserved hypothetical protein [Trichoplax adhaerens] >gi|190581618|gb|EDV21694.1| conserved hypothetical protein [Trichoplax adhaerens]
comp9955_c0	742	225459249	XP_002285764.1	316	1	678	27	249	226	134	169	59.292	733	2.03e-93	PREDICTED: uncharacterized protein LOC100253906 [Vitis vinifera] >gi|147765767|emb|CAN68979.1| hypothetical protein VITISV_040775 [Vitis vinifera]
comp9990_c0	504	224116122	XP_002332002.1	62	256	372	4	42	39	22	29	56.4103	136	5.06e-09	predicted protein [Populus trichocarpa] >gi|222874770|gb|EEF11901.1| predicted protein [Populus trichocarpa]
comp9991_c0	212	170094566	XP_001878504.1	239	1	129	193	236	44	34	38	77.2727	167	2.09e-13	predicted protein [Laccaria bicolor S238N-H82] >gi|164646958|gb|EDR11203.1| predicted protein [Laccaria bicolor S238N-H82]
comp10014_c0	221	302143179	CBI20474.3	494	3	221	290	362	73	50	59	68.4932	255	8.14e-25	unnamed protein product [Vitis vinifera]
comp10023_c0	689	147867403	CAN83274.1	404	1	582	62	265	206	121	153	58.7379	540	9.35e-64	hypothetical protein VITISV_026334 [Vitis vinifera]
comp10161_c0	258	255588222	XP_002534540.1	657	2	253	522	605	84	57	64	67.8571	321	2.47e-33	carbohydrate binding protein, putative [Ricinus communis] >gi|223525085|gb|EEF27844.1| carbohydrate binding protein, putative [Ricinus communis]
comp10232_c0	686	392577703	EIW70832.1	479	19	195	250	309	60	30	37	50	128	3.35e-06	hypothetical protein TREMEDRAFT_61338 [Tremella mesenterica DSM 1558]
comp10305_c0	418	296826114	XP_002850919.1	538	6	416	359	495	137	111	127	81.0219	653	1.66e-80	isocitrate lyase [Arthroderma otae CBS 113480] >gi|238838473|gb|EEQ28135.1| isocitrate lyase [Arthroderma otae CBS 113480]
comp10332_c0	250	350538145	NP_001234073.1	1048	2	250	921	1003	83	68	77	81.9277	309	3.06e-31	calcium-transporting ATPase, endoplasmic reticulum-type [Solanum lycopersicum] >gi|68052031|sp|Q42883.1|ECAP_SOLLC RecName: Full=Calcium-transporting ATPase, endoplasmic reticulum-type >gi|170378|gb|AAA34138.1| Ca2+-ATPase [Solanum lycopersicum] >gi|4206311|gb|AAD11617.1| Ca2+-ATPase [Solanum lycopersicum] >gi|4206313|gb|AAD11618.1| Ca2+-ATPase [Solanum lycopersicum]
comp10372_c0	412	255543959	XP_002513042.1	602	1	411	348	486	140	66	96	47.1429	301	6.43e-30	serine-threonine protein kinase, plant-type, putative [Ricinus communis] >gi|223548053|gb|EEF49545.1| serine-threonine protein kinase, plant-type, putative [Ricinus communis]
comp10399_c0	207	224117852	XP_002317684.1	824	3	206	338	407	70	60	64	85.7143	299	2.38e-30	predicted protein [Populus trichocarpa] >gi|222860749|gb|EEE98296.1| predicted protein [Populus trichocarpa]
comp10407_c0	321	224116722	XP_002331861.1	174	54	311	18	105	89	35	47	39.3258	125	2.31e-07	predicted protein [Populus trichocarpa] >gi|222875379|gb|EEF12510.1| predicted protein [Populus trichocarpa]
comp10421_c0	223	255559034	XP_002520540.1	335	1	219	35	110	76	60	66	78.9474	309	7.52e-33	zinc transporter, putative [Ricinus communis] >gi|223540382|gb|EEF41953.1| zinc transporter, putative [Ricinus communis]
comp10428_c0	247	392574842	EIW67977.1	543	3	245	305	385	81	72	75	88.8889	262	1.68e-25	hypothetical protein TREMEDRAFT_40105 [Tremella mesenterica DSM 1558]
comp10505_c0	302	321263795	XP_003196615.1	333	1	297	135	233	99	70	85	70.7071	379	1.02e-42	aldehyde reductase i [Cryptococcus gattii WM276] >gi|317463092|gb|ADV24828.1| Aldehyde reductase i, putative [Cryptococcus gattii WM276]
comp10521_c0	362	147854668	CAN80242.1	113	149	331	1	62	62	33	41	53.2258	152	3.27e-11	hypothetical protein VITISV_029130 [Vitis vinifera]
comp10624_c0	237	147863511	CAN79785.1	245	51	206	169	220	52	32	38	61.5385	169	1.18e-13	hypothetical protein VITISV_002634 [Vitis vinifera]
comp10666_c0	397	3810596	AAC69378.1	945	14	397	740	867	128	62	81	48.4375	311	9.32e-31	putative retroelement pol polyprotein [Arabidopsis thaliana]
comp10821_c0	412	357116318	XP_003559929.1	646	3	149	598	646	49	41	46	83.6735	250	7.72e-23	PREDICTED: putative pentatricopeptide repeat-containing protein At3g23330-like [Brachypodium distachyon]
comp10850_c0	385	224143809	XP_002325082.1	484	89	385	386	484	99	82	92	82.8283	457	2.07e-52	predicted protein [Populus trichocarpa] >gi|222866516|gb|EEF03647.1| predicted protein [Populus trichocarpa]
comp10915_c0	266	380482982	CCF40900.1	351	1	258	97	182	86	54	68	62.7907	222	1.96e-20	allergen [Colletotrichum higginsianum]
comp11010_c0	253	297739445	CBI29627.3	284	28	228	152	214	67	43	52	64.1791	222	1.19e-20	unnamed protein product [Vitis vinifera]
comp11027_c0	427	58270894	XP_572603.1	551	1	387	1	129	129	117	126	90.6977	644	5.02e-79	phosphoenolpyruvate carboxykinase [Cryptococcus neoformans var. neoformans JEC21] >gi|134115184|ref|XP_773890.1| hypothetical protein CNBH3420 [Cryptococcus neoformans var. neoformans B-3501A] >gi|50256518|gb|EAL19243.1| hypothetical protein CNBH3420 [Cryptococcus neoformans var. neoformans B-3501A] >gi|57228862|gb|AAW45296.1| phosphoenolpyruvate carboxykinase, putative [Cryptococcus neoformans v…
comp11029_c0	455	242041789	XP_002468289.1	524	3	440	137	285	154	69	90	44.8052	224	3.01e-19	hypothetical protein SORBIDRAFT_01g043070 [Sorghum bicolor] >gi|241922143|gb|EER95287.1| hypothetical protein SORBIDRAFT_01g043070 [Sorghum bicolor]
comp11043_c0	237	170660047	ACB28472.1	953	8	226	663	735	73	27	46	36.9863	138	1.62e-08	polyprotein [Ananas comosus]
comp11050_c0	623	259490505	NP_001159216.1	261	286	621	149	259	112	64	89	57.1429	324	1.07e-33	uncharacterized protein LOC100304302 [Zea mays] >gi|223942727|gb|ACN25447.1| unknown [Zea mays]
comp11067_c0	474	13620226	CAC36401.1	1192	16	450	40	177	146	65	92	44.5205	244	1.81e-21	hypothetical protein [Solanum lycopersicum]
comp11069_c0	2266	359496850	XP_003635354.1	2807	370	1434	509	863	355	217	270	61.1268	1206	3.32e-175	PREDICTED: uncharacterized protein LOC100854728 [Vitis vinifera]
comp11075_c0	238	108935817	P40108.2	496	98	238	450	496	47	41	44	87.234	230	3.58e-21	RecName: Full=Aldehyde dehydrogenase; Short=ALDDH; Short=ALDH; AltName: Full=Allergen Cla h 3; AltName: Full=Allergen Cla h III; AltName: Allergen=Cla h 10 >gi|76666769|emb|CAA55072.2| aldehyde dehydrogenase, allergen Cla h 10 [Davidiella tassiana]
comp11119_c0	736	8778554	AAF79562.1	377	60	311	289	371	84	53	66	63.0952	296	1.96e-28	F22G5.38 [Arabidopsis thaliana]
comp11129_c0	368	255575738	XP_002528768.1	466	23	367	346	460	115	61	82	53.0435	360	9.94e-39	UDP-glucosyltransferase, putative [Ricinus communis] >gi|223531771|gb|EEF33590.1| UDP-glucosyltransferase, putative [Ricinus communis]
comp11133_c0	472	242095294	XP_002438137.1	208	81	233	69	119	51	37	43	72.549	197	1.84e-18	hypothetical protein SORBIDRAFT_10g008620 [Sorghum bicolor] >gi|241916360|gb|EER89504.1| hypothetical protein SORBIDRAFT_10g008620 [Sorghum bicolor]
comp11137_c0	226	255549002	XP_002515557.1	364	2	193	299	362	64	44	53	68.75	234	2.2e-22	conserved hypothetical protein [Ricinus communis] >gi|1621268|emb|CAB02653.1| unknown [Ricinus communis] >gi|223545501|gb|EEF47006.1| conserved hypothetical protein [Ricinus communis]
comp11154_c0	877	359482115	XP_003632713.1	989	2	877	457	748	292	202	239	69.1781	1039	1.29e-130	PREDICTED: pentatricopeptide repeat-containing protein At4g13650-like [Vitis vinifera]
comp11178_c0	663	225435528	XP_002283014.1	591	160	663	425	591	168	129	148	76.7857	714	1.21e-87	PREDICTED: uncharacterized protein LOC100265521 [Vitis vinifera] >gi|297746366|emb|CBI16422.3| unnamed protein product [Vitis vinifera]
comp11187_c0	294	321259241	XP_003194341.1	863	1	294	179	276	98	91	97	92.8571	518	4.33e-60	ribonucleoside-diphosphate reductase large chain [Cryptococcus gattii WM276] >gi|317460812|gb|ADV22554.1| ribonucleoside-diphosphate reductase large chain, putative [Cryptococcus gattii WM276]
comp11190_c0	588	224131716	XP_002321160.1	401	139	528	158	285	130	75	97	57.6923	396	4.12e-43	predicted protein [Populus trichocarpa] >gi|222861933|gb|EEE99475.1| predicted protein [Populus trichocarpa]
comp11202_c0	814	140068417	ABE87633.2	121	412	759	2	114	116	61	76	52.5862	243	8.29e-23	Putative polyprotein, related [Medicago truncatula]
comp11213_c0	244	147783182	CAN68669.1	1360	91	228	1	46	46	37	40	80.4348	183	2.17e-14	hypothetical protein VITISV_039388 [Vitis vinifera]
comp11239_c0	425	297829698	XP_002882731.1	502	4	423	116	286	171	86	112	50.2924	310	1.66e-31	glycerol-3-phosphate acyltransferase 5 [Arabidopsis lyrata subsp. lyrata] >gi|297328571|gb|EFH58990.1| glycerol-3-phosphate acyltransferase 5 [Arabidopsis lyrata subsp. lyrata]
comp11252_c0	378	58267888	XP_571100.1	2513	2	376	1927	2051	125	108	117	86.4	590	4.78e-68	fatty-acid synthase complex protein [Cryptococcus neoformans var. neoformans JEC21] >gi|57227334|gb|AAW43793.1| fatty-acid synthase complex protein, putative [Cryptococcus neoformans var. neoformans JEC21]
comp11255_c0	814	357137291	XP_003570234.1	585	276	812	7	185	179	137	155	76.5363	699	8.83e-85	PREDICTED: nitrate transporter 1.5-like [Brachypodium distachyon]
comp11256_c0	480	147852016	CAN82285.1	1074	26	313	297	389	97	49	60	50.5155	199	1.82e-15	hypothetical protein VITISV_039753 [Vitis vinifera]
comp11311_c0	537	398409718	XP_003856324.1	374	72	536	172	316	155	83	102	53.5484	346	2.09e-36	hypothetical protein MYCGRDRAFT_83802 [Mycosphaerella graminicola IPO323] >gi|339476209|gb|EGP91300.1| hypothetical protein MYCGRDRAFT_83802 [Mycosphaerella graminicola IPO323]
comp11321_c0	277	168008671	XP_001757030.1	151	1	99	116	148	33	23	29	69.697	133	1.01e-08	predicted protein [Physcomitrella patens subsp. patens] >gi|162691901|gb|EDQ78261.1| predicted protein [Physcomitrella patens subsp. patens]
comp11363_c0	501	398407245	XP_003855088.1	155	168	500	45	155	111	108	110	97.2973	572	1.07e-72	40S ribosomal protein S18 [Mycosphaerella graminicola IPO323] >gi|339474972|gb|EGP90064.1| hypothetical protein MYCGRDRAFT_55708 [Mycosphaerella graminicola IPO323]
comp11370_c0	226	240276051	EER39564.1	808	1	225	419	493	75	67	70	89.3333	366	2.19e-39	translation elongation factor eEF-3 [Ajellomyces capsulatus H143]
comp11428_c0	377	255537361	XP_002509747.1	497	5	190	165	226	62	30	42	48.3871	169	3.05e-12	myb, putative [Ricinus communis] >gi|223549646|gb|EEF51134.1| myb, putative [Ricinus communis]
comp11431_c0	355	15617438	BAB64937.1	988	55	354	244	343	100	41	53	41	190	8.27e-15	TdcA1-ORF1-ORF2 [Daucus carota]
comp11504_c0	372	307136165	ADN34006.1	191	3	335	80	191	112	71	87	63.3929	305	8.78e-33	disease resistance response protein [Cucumis melo subsp. melo]
comp11510_c0	448	5107812	AAD40125.1	413	2	271	323	413	91	42	56	46.1538	194	1.75e-15	contains similarity to number of Arabidopsis thaliana hypothetical proteins including AC004521 and AL031326 [Arabidopsis thaliana]
comp11548_c0	397	359485467	XP_002277954.2	1044	1	264	501	588	88	53	64	60.2273	189	1.47e-14	PREDICTED: G-type lectin S-receptor-like serine/threonine-protein kinase SD2-5-like [Vitis vinifera]
comp11591_c0	372	225427810	XP_002270504.1	104	9	317	1	103	103	86	92	83.4951	464	9.26e-58	PREDICTED: auxin-induced protein 15A [Vitis vinifera] >gi|147856535|emb|CAN82489.1| hypothetical protein VITISV_036184 [Vitis vinifera]
comp11638_c0	206	321251100	XP_003191958.1	538	3	206	169	236	68	49	57	72.0588	285	5.64e-29	hypothetical protein CGB_B1770C [Cryptococcus gattii WM276] >gi|317458426|gb|ADV20171.1| Hypothetical protein CGB_B1770C [Cryptococcus gattii WM276]
comp11680_c0	940	147784087	CAN67874.1	137	1	117	2	41	40	32	36	80	176	3.18e-13	hypothetical protein VITISV_006281 [Vitis vinifera]
comp11683_c0	407	58264770	XP_569541.1	491	2	349	1	120	120	78	100	65	419	8.19e-47	MFS transporter [Cryptococcus neoformans var. neoformans JEC21] >gi|134109873|ref|XP_776486.1| hypothetical protein CNBC5400 [Cryptococcus neoformans var. neoformans B-3501A] >gi|50259162|gb|EAL21839.1| hypothetical protein CNBC5400 [Cryptococcus neoformans var. neoformans B-3501A] >gi|57225773|gb|AAW42234.1| MFS transporter, putative [Cryptococcus neoformans var. neoformans JEC21]
comp11786_c0	576	226501080	NP_001146183.1	363	2	574	176	356	199	128	152	64.3216	587	7.78e-72	uncharacterized protein LOC100279753 [Zea mays] >gi|219886087|gb|ACL53418.1| unknown [Zea mays]
comp11788_c0	396	129282131	ABO30057.1	151	101	394	54	151	98	66	80	67.3469	372	4.1e-43	xanthine/uracil/vitamin C permease, partial [Triticum aestivum] >gi|129282157|gb|ABO30070.1| xanthine/uracil/vitamin C permease, partial [Triticum aestivum] >gi|129282173|gb|ABO30078.1| xanthine/uracil/vitamin C permease, partial [Triticum aestivum] >gi|129282185|gb|ABO30084.1| xanthine/uracil/vitamin C permease, partial [Triticum aestivum]
comp11791_c0	530	359485399	XP_002274770.2	529	1	528	341	516	176	127	146	72.1591	721	4.55e-90	PREDICTED: mitotic checkpoint serine/threonine-protein kinase BUB1-like [Vitis vinifera]
comp11819_c0	299	58269728	XP_572020.1	464	3	299	186	284	99	90	95	90.9091	401	7.4e-45	translation elongation factor [Cryptococcus neoformans var. neoformans JEC21] >gi|134113865|ref|XP_774180.1| hypothetical protein CNBG1620 [Cryptococcus neoformans var. neoformans B-3501A] >gi|50256815|gb|EAL19533.1| hypothetical protein CNBG1620 [Cryptococcus neoformans var. neoformans B-3501A] >gi|57228256|gb|AAW44713.1| translation elongation factor, putative [Cryptococcus neoformans var. neof…
comp11858_c0	1474	224058637	XP_002299578.1	698	10	1395	236	695	468	257	321	54.9145	1249	5.4e-162	predicted protein [Populus trichocarpa] >gi|222846836|gb|EEE84383.1| predicted protein [Populus trichocarpa]
comp11880_c0	209	330912894	XP_003296109.1	468	1	207	59	127	69	46	58	66.6667	246	9e-24	hypothetical protein PTT_04916 [Pyrenophora teres f. teres 0-1] >gi|311332002|gb|EFQ95791.1| hypothetical protein PTT_04916 [Pyrenophora teres f. teres 0-1]
comp11897_c0	299	398406208	XP_003854570.1	156	12	275	3	95	93	63	71	67.7419	276	3.13e-29	hypothetical protein MYCGRDRAFT_103595 [Mycosphaerella graminicola IPO323] >gi|339474453|gb|EGP89546.1| hypothetical protein MYCGRDRAFT_103595 [Mycosphaerella graminicola IPO323]
comp11922_c0	202	255569307	XP_002525621.1	523	2	202	371	436	67	46	55	68.6567	244	3.18e-23	cdc6, putative [Ricinus communis] >gi|223535057|gb|EEF36739.1| cdc6, putative [Ricinus communis]
comp11956_c0	209	184161308	ACC68681.1	461	4	207	249	316	68	47	55	69.1176	256	4.03e-25	vacoular processing enzyme 2 [Solanum tuberosum]
comp11961_c0	338	321258203	XP_003193848.1	87	43	303	1	87	87	80	84	91.954	427	1.46e-52	ribosomal protein s21 [Cryptococcus gattii WM276] >gi|317460318|gb|ADV22061.1| Ribosomal protein s21, putative [Cryptococcus gattii WM276]
comp12010_c0	203	149263818	XP_001473149.1	110	3	200	1	66	66	64	65	96.9697	345	1.26e-40	PREDICTED: 60S ribosomal protein L35a-like [Mus musculus] >gi|309262801|ref|XP_003085894.1| PREDICTED: 60S ribosomal protein L35a-like [Mus musculus]
comp12011_c1	582	206584341	ACI15343.1	327	2	331	60	169	111	80	88	72.0721	433	3.74e-49	NAC domain protein NAC6 [Gossypium hirsutum] >gi|206584359|gb|ACI15352.1| NAC domain protein NAC6 [Gossypium hirsutum]
comp12096_c0	432	356502974	XP_003520289.1	1826	100	312	1	71	71	45	52	63.3803	156	1.83e-13	PREDICTED: uncharacterized protein LOC100784699 [Glycine max]
comp12097_c0	1280	218200375	EEC82802.1	748	3	1112	338	731	394	228	265	57.868	1024	8.19e-129	hypothetical protein OsI_27571 [Oryza sativa Indica Group]
comp12101_c0	241	147845547	CAN78493.1	1048	9	170	211	267	58	26	33	44.8276	126	7.4e-07	hypothetical protein VITISV_037041 [Vitis vinifera]
comp12103_c0	285	357127969	XP_003565649.1	567	2	283	326	419	94	59	73	62.766	297	4.64e-30	PREDICTED: pentatricopeptide repeat-containing protein At2g37320-like [Brachypodium distachyon]
comp12116_c0	209	308450159	XP_003088200.1	122	49	207	1	53	53	34	39	64.1509	157	1.73e-12	hypothetical protein CRE_03576 [Caenorhabditis remanei] >gi|308248801|gb|EFO92753.1| hypothetical protein CRE_03576 [Caenorhabditis remanei]
comp12122_c0	203	359486485	XP_003633450.1	267	42	179	1	50	50	32	34	64	153	1.82e-11	PREDICTED: uncharacterized protein LOC100853686 [Vitis vinifera]
comp12123_c0	250	6691193	AAF24531.1	1799	115	240	952	990	42	26	31	61.9048	121	1.15e-12	F7F22.17 [Arabidopsis thaliana]
comp12153_c0	205	326468636	EGD92645.1	776	1	204	489	556	68	67	68	98.5294	340	5.24e-36	plasma membrane ATPase [Trichophyton tonsurans CBS 112818]
comp12164_c0	284	147784790	CAN75225.1	793	2	205	549	617	69	51	59	73.913	296	6.98e-34	hypothetical protein VITISV_035856 [Vitis vinifera]
comp12166_c0	284	115435776	NP_001042646.1	94	79	279	25	90	68	26	41	38.2353	126	7.02e-08	Os01g0260800 [Oryza sativa Japonica Group] >gi|7228437|dbj|BAA92397.1| unknown protein [Oryza sativa Japonica Group] >gi|9558526|dbj|BAB03444.1| unknown protein [Oryza sativa Japonica Group] >gi|113532177|dbj|BAF04560.1| Os01g0260800 [Oryza sativa Japonica Group] >gi|125569801|gb|EAZ11316.1| hypothetical protein OsJ_01180 [Oryza sativa Japonica Group] >gi|215701076|dbj|BAG92500.1| unnamed protein…
comp12198_c0	266	398411941	XP_003857303.1	101	1	162	48	101	54	34	44	62.963	175	6.3e-15	hypothetical protein MYCGRDRAFT_102525 [Mycosphaerella graminicola IPO323] >gi|339477188|gb|EGP92279.1| hypothetical protein MYCGRDRAFT_102525 [Mycosphaerella graminicola IPO323]
comp12206_c0	298	111227992	ABH08978.1	234	2	298	135	233	99	95	98	95.9596	520	6.28e-65	translation elongation factor 1 alpha [Botryosphaeria dothidea]
comp12223_c0	505	83769826	BAE59961.1	296	4	504	51	218	168	135	152	80.3571	733	5.04e-95	unnamed protein product [Aspergillus oryzae RIB40]
comp12223_c1	298	378728282	EHY54741.1	390	83	298	319	390	72	44	56	61.1111	230	2.75e-21	aryl-alcohol dehydrogenase AAD14 [Exophiala dermatitidis NIH/UT8656]
comp12252_c0	668	359486373	XP_002277384.2	419	17	667	128	344	217	133	170	61.2903	748	9.21e-95	PREDICTED: uncharacterized protein LOC100262072 [Vitis vinifera] >gi|297736550|emb|CBI25421.3| unnamed protein product [Vitis vinifera]
comp12252_c1	275	326491669	BAJ94312.1	462	1	228	381	456	76	49	60	64.4737	280	3.2e-28	predicted protein [Hordeum vulgare subsp. vulgare] >gi|326492492|dbj|BAK02029.1| predicted protein [Hordeum vulgare subsp. vulgare] >gi|326495430|dbj|BAJ85811.1| predicted protein [Hordeum vulgare subsp. vulgare]
comp12309_c0	327	168052882	XP_001778868.1	532	20	151	291	334	44	27	33	61.3636	132	1.71e-07	predicted protein [Physcomitrella patens subsp. patens] >gi|162669737|gb|EDQ56318.1| predicted protein [Physcomitrella patens subsp. patens]
comp12353_c0	255	218198914	EEC81341.1	943	2	154	888	938	51	33	45	64.7059	210	5.46e-18	hypothetical protein OsI_24527 [Oryza sativa Indica Group]
comp12383_c0	828	359476994	XP_002263495.2	387	72	746	161	387	231	118	169	51.0823	503	1.01e-57	PREDICTED: uncharacterized protein LOC100260227 [Vitis vinifera]
comp12400_c0	315	357119630	XP_003561538.1	455	73	303	299	377	79	40	55	50.6329	174	3.16e-13	PREDICTED: uncharacterized protein LOC100840884 [Brachypodium distachyon]
comp12417_c0	234	147802173	CAN77253.1	215	141	233	171	201	31	20	29	64.5161	117	2.4e-06	hypothetical protein VITISV_020397 [Vitis vinifera]
comp12428_c0	203	378731853	EHY58312.1	314	1	198	77	142	66	53	60	80.303	221	9.99e-21	bacteriorhodopsin [Exophiala dermatitidis NIH/UT8656]
comp12441_c0	245	355677328	AER95961.1	247	27	245	2	73	73	33	49	45.2055	172	5.44e-14	cyclin-dependent kinase 10 [Mustela putorius furo]
comp12469_c0	237	299738231	XP_001838196.2	198	13	237	87	161	75	40	50	53.3333	209	2.28e-19	hypothetical protein CC1G_07937 [Coprinopsis cinerea okayama7#130] >gi|298403212|gb|EAU83564.2| hypothetical protein CC1G_07937 [Coprinopsis cinerea okayama7#130]
comp12478_c0	235	297738361	CBI27562.3	688	87	233	513	561	49	30	37	61.2245	181	2.47e-14	unnamed protein product [Vitis vinifera]
comp12532_c0	347	58260588	XP_567704.1	763	2	343	271	384	114	91	100	79.8246	416	8.01e-46	5-methyltetrahydropteroyltriglutamate-homocysteine S-methyltransferase [Cryptococcus neoformans var. neoformans JEC21] >gi|134117047|ref|XP_772750.1| hypothetical protein CNBK1240 [Cryptococcus neoformans var. neoformans B-3501A] >gi|50255368|gb|EAL18103.1| hypothetical protein CNBK1240 [Cryptococcus neoformans var. neoformans B-3501A] >gi|57229785|gb|AAW46187.1| 5-methyltetrahydropteroyltrigluta…
comp12576_c0	659	154354073	ABS76146.1	389	24	659	177	388	212	139	173	65.566	722	2.8e-91	naringenin-chalcone synthase [Elaeis oleifera]
comp12577_c0	253	255565234	XP_002523609.1	1526	3	251	333	415	83	55	70	66.2651	333	2.2e-34	DNA polymerase alpha catalytic subunit, putative [Ricinus communis] >gi|223537171|gb|EEF38804.1| DNA polymerase alpha catalytic subunit, putative [Ricinus communis]
comp12620_c0	279	147843692	CAN79868.1	154	2	274	30	121	92	50	66	54.3478	239	7.13e-24	hypothetical protein VITISV_011481 [Vitis vinifera]
comp12626_c0	289	15451259	BAB64529.1	812	14	199	209	274	66	45	50	68.1818	237	1.23e-24	TdcA1-ORF2 [Daucus carota]
comp12633_c0	237	392573861	EIW66999.1	1806	42	236	1711	1775	65	55	63	84.6154	313	8.69e-32	glucan synthase [Tremella mesenterica DSM 1558]
comp12655_c0	258	336371846	EGO00186.1	156	2	91	127	156	30	25	28	83.3333	144	2.83e-10	hypothetical protein SERLA73DRAFT_180631 [Serpula lacrymans var. lacrymans S7.3] >gi|336384595|gb|EGO25743.1| hypothetical protein SERLADRAFT_466318 [Serpula lacrymans var. lacrymans S7.9]
comp12670_c0	207	242820379	XP_002487498.1	628	1	207	73	141	69	69	69	100	368	2.74e-40	fumarate reductase Osm1, putative [Talaromyces stipitatus ATCC 10500] >gi|218713963|gb|EED13387.1| fumarate reductase Osm1, putative [Talaromyces stipitatus ATCC 10500]
comp12674_c0	284	58264706	XP_569509.1	640	1	282	81	174	94	90	91	95.7447	480	1.94e-55	heat shock protein 70 [Cryptococcus neoformans var. neoformans JEC21] >gi|134109775|ref|XP_776437.1| hypothetical protein CNBC4920 [Cryptococcus neoformans var. neoformans B-3501A] >gi|50259113|gb|EAL21790.1| hypothetical protein CNBC4920 [Cryptococcus neoformans var. neoformans B-3501A] >gi|56044090|dbj|BAD72840.1| heat shock protein 70 [Cryptococcus neoformans var. neoformans] >gi|57225741|gb|A…
comp12707_c0	372	169603437	XP_001795140.1	112	72	269	1	66	66	53	59	80.303	148	1.39e-10	hypothetical protein SNOG_04728 [Phaeosphaeria nodorum SN15] >gi|111067368|gb|EAT88488.1| hypothetical protein SNOG_04728 [Phaeosphaeria nodorum SN15]
comp12733_c0	293	321259655	XP_003194548.1	416	68	292	186	261	76	53	62	69.7368	283	1.53e-28	nucleosome assembly protein I [Cryptococcus gattii WM276] >gi|317461019|gb|ADV22761.1| nucleosome assembly protein I, putative [Cryptococcus gattii WM276]
comp12741_c0	279	392576852	EIW69982.1	516	3	278	322	414	93	69	85	74.1935	349	1.32e-37	hypothetical protein TREMEDRAFT_38649 [Tremella mesenterica DSM 1558]
comp12771_c0	531	357120013	XP_003561726.1	166	82	231	75	124	50	33	40	66	183	1.82e-17	PREDICTED: uncharacterized protein LOC100836522 [Brachypodium distachyon]
comp12791_c0	250	398406459	XP_003854695.1	69	72	242	1	58	58	52	52	89.6552	188	2.48e-17	hypothetical protein MYCGRDRAFT_103006 [Mycosphaerella graminicola IPO323] >gi|339474579|gb|EGP89671.1| hypothetical protein MYCGRDRAFT_103006 [Mycosphaerella graminicola IPO323]
comp12836_c0	374	255548395	XP_002515254.1	868	2	373	103	226	124	99	113	79.8387	512	8.51e-59	Stachyose synthase precursor, putative [Ricinus communis] >gi|223545734|gb|EEF47238.1| Stachyose synthase precursor, putative [Ricinus communis]
comp12847_c0	383	321254675	XP_003193158.1	642	55	381	1	108	109	78	82	71.5596	367	3.39e-39	putative transporter C530.15c [Cryptococcus gattii WM276] >gi|317459627|gb|ADV21371.1| Putative transporter C530.15c [Cryptococcus gattii WM276]
comp12850_c0	417	321254823	XP_003193210.1	600	2	415	14	151	138	104	120	75.3623	458	9.82e-52	monosaccharide transporter [Cryptococcus gattii WM276] >gi|317459679|gb|ADV21423.1| Monosaccharide transporter, putative [Cryptococcus gattii WM276]
comp12866_c0	700	255558007	XP_002520032.1	1143	75	698	210	384	208	130	147	62.5	653	8.71e-76	Cellulose synthase A catalytic subunit 3 [UDP-forming], putative [Ricinus communis] >gi|223540796|gb|EEF42356.1| Cellulose synthase A catalytic subunit 3 [UDP-forming], putative [Ricinus communis]
comp12909_c0	368	321260398	XP_003194919.1	1080	2	367	892	1013	122	87	107	71.3115	474	5.04e-53	importin beta-4 subunit [Cryptococcus gattii WM276] >gi|317461391|gb|ADV23132.1| Importin beta-4 subunit, putative [Cryptococcus gattii WM276]
comp12909_c1	274	321260398	XP_003194919.1	1080	1	273	796	885	91	69	79	75.8242	360	4.43e-38	importin beta-4 subunit [Cryptococcus gattii WM276] >gi|317461391|gb|ADV23132.1| Importin beta-4 subunit, putative [Cryptococcus gattii WM276]
comp12924_c0	267	326492143	BAJ98296.1	439	3	239	68	146	79	68	74	86.0759	412	7.32e-47	predicted protein [Hordeum vulgare subsp. vulgare]
comp12969_c0	225	115441543	NP_001045051.1	512	13	210	327	390	69	36	46	52.1739	159	1.93e-11	Os01g0890800 [Oryza sativa Japonica Group] >gi|113534582|dbj|BAF06965.1| Os01g0890800 [Oryza sativa Japonica Group]
comp12972_c0	211	321253867	XP_003192880.1	189	1	210	90	159	70	39	50	55.7143	179	3.11e-15	inorganic phosphate transporter pho88 [Cryptococcus gattii WM276] >gi|317459349|gb|ADV21093.1| inorganic phosphate transporter pho88, putative [Cryptococcus gattii WM276]
comp12974_c0	518	321260915	XP_003195177.1	150	59	478	1	141	141	112	123	79.4326	531	1.86e-66	60S ribosomal protein L24 (L30) [Cryptococcus gattii WM276] >gi|317461650|gb|ADV23390.1| 60S ribosomal protein L24 (L30), putative [Cryptococcus gattii WM276]
comp13020_c1	460	147789442	CAN64450.1	738	120	458	515	627	113	83	97	73.4513	424	2.07e-46	hypothetical protein VITISV_023114 [Vitis vinifera]
comp13035_c0	283	297734140	CBI15387.3	965	4	276	19	107	91	47	66	51.6484	236	2.63e-21	unnamed protein product [Vitis vinifera]
comp13054_c0	364	58266128	XP_570220.1	151	1	336	1	112	112	104	108	92.8571	551	2.35e-70	hypothetical protein [Cryptococcus neoformans var. neoformans JEC21] >gi|134110972|ref|XP_775950.1| hypothetical protein CNBD3570 [Cryptococcus neoformans var. neoformans B-3501A] >gi|50258616|gb|EAL21303.1| hypothetical protein CNBD3570 [Cryptococcus neoformans var. neoformans B-3501A] >gi|57226453|gb|AAW42913.1| conserved hypothetical protein [Cryptococcus neoformans var. neoformans JEC21]
comp13097_c0	220	398388557	XP_003847740.1	490	17	220	80	147	68	38	51	55.8824	218	1.18e-19	hypothetical protein MYCGRDRAFT_77856 [Mycosphaerella graminicola IPO323] >gi|339467613|gb|EGP82716.1| hypothetical protein MYCGRDRAFT_77856 [Mycosphaerella graminicola IPO323]
comp13106_c0	430	91214188	YP_538811.1	90	3	221	1	73	73	73	73	100	367	6.96e-43	ribosomal protein S15 [Glycine max] >gi|118595718|sp|Q2PMN9.1|RR15_SOYBN RecName: Full=30S ribosomal protein S15, chloroplastic >gi|83595789|gb|ABC25170.1| ribosomal protein S15 [Glycine max] >gi|255647337|gb|ACU24135.1| unknown [Glycine max]
comp13111_c0	392	296088582	CBI37573.3	668	3	392	381	512	132	73	99	55.303	334	1.86e-34	unnamed protein product [Vitis vinifera]
comp13136_c0	357	394309325	AFN26994.1	384	3	356	72	189	118	116	117	98.3051	636	5.03e-80	luciferin binding protein, partial [Alexandrium fundyense]
comp13136_c1	228	394309325	AFN26994.1	384	1	228	1	76	76	74	75	97.3684	401	6.15e-46	luciferin binding protein, partial [Alexandrium fundyense]
comp13137_c0	263	115479901	NP_001063544.1	529	2	250	359	441	83	47	62	56.6265	256	1.39e-24	Os09g0493400 [Oryza sativa Japonica Group] >gi|113631777|dbj|BAF25458.1| Os09g0493400 [Oryza sativa Japonica Group]
comp13149_c0	283	388503462	AFK39797.1	148	2	121	33	72	40	32	37	80	177	7.65e-15	unknown [Lotus japonicus]
comp13167_c0	209	297743259	CBI36126.3	434	14	118	400	434	35	27	32	77.1429	147	4.67e-10	unnamed protein product [Vitis vinifera]
comp13175_c0	266	396484052	XP_003841853.1	781	1	264	288	375	88	83	86	94.3182	448	1.02e-50	similar to aconitate hydratase [Leptosphaeria maculans JN3] >gi|312218428|emb|CBX98374.1| similar to aconitate hydratase [Leptosphaeria maculans JN3]
comp13183_c0	257	58268392	XP_571352.1	783	2	256	287	371	85	83	85	97.6471	359	2.71e-38	pre-mRNA splicing factor [Cryptococcus neoformans var. neoformans JEC21] >gi|134112768|ref|XP_774927.1| hypothetical protein CNBF0920 [Cryptococcus neoformans var. neoformans B-3501A] >gi|50257575|gb|EAL20280.1| hypothetical protein CNBF0920 [Cryptococcus neoformans var. neoformans B-3501A] >gi|57227587|gb|AAW44045.1| pre-mRNA splicing factor, putative [Cryptococcus neoformans var. neoformans JEC…
comp13192_c0	440	398389424	XP_003848173.1	236	1	381	1	127	127	102	115	80.315	567	3.81e-71	hypothetical protein MYCGRDRAFT_77354 [Mycosphaerella graminicola IPO323] >gi|339468047|gb|EGP83149.1| hypothetical protein MYCGRDRAFT_77354 [Mycosphaerella graminicola IPO323]
comp13196_c0	237	395333127	EJF65505.1	86	3	200	1	66	66	51	57	77.2727	259	7.94e-28	hypothetical protein DICSQDRAFT_144144 [Dichomitus squalens LYAD-421 SS1]
comp13221_c0	575	225434492	XP_002275283.1	259	3	482	68	228	161	92	116	57.1429	527	4.02e-64	PREDICTED: gamma-interferon-inducible lysosomal thiol reductase isoform 2 [Vitis vinifera] >gi|297745847|emb|CBI15903.3| unnamed protein product [Vitis vinifera]
comp13265_c0	256	322696257	EFY88052.1	626	2	256	65	149	85	70	76	82.3529	385	2.2e-42	facilitated glucose transporter, putative [Metarhizium acridum CQMa 102]
comp13268_c0	244	170087260	XP_001874853.1	595	1	237	459	539	81	51	59	62.963	244	6.31e-23	glycoside hydrolase family 5 protein [Laccaria bicolor S238N-H82] >gi|164650053|gb|EDR14294.1| glycoside hydrolase family 5 protein [Laccaria bicolor S238N-H82]
comp13315_c0	236	224084392	XP_002335344.1	131	26	157	89	131	44	24	34	54.5455	116	1.32e-06	multidrug resistance protein ABC transporter family [Populus trichocarpa] >gi|222834162|gb|EEE72639.1| multidrug resistance protein ABC transporter family [Populus trichocarpa]
comp13318_c0	230	356545651	XP_003541250.1	103	76	213	20	66	47	27	32	57.4468	127	1.82e-14	PREDICTED: uncharacterized protein LOC100816651 [Glycine max]
comp13329_c0	232	356530181	XP_003533662.1	469	1	231	162	239	78	40	56	51.2821	198	6.69e-17	PREDICTED: MATE efflux family protein 9-like [Glycine max]
comp13346_c0	246	398397831	XP_003852373.1	426	1	246	195	276	82	74	79	90.2439	400	2.51e-45	hypothetical protein MYCGRDRAFT_42499 [Mycosphaerella graminicola IPO323] >gi|339472254|gb|EGP87349.1| hypothetical protein MYCGRDRAFT_42499 [Mycosphaerella graminicola IPO323]
comp13369_c0	290	296088293	CBI36738.3	425	3	113	2	38	37	23	32	62.1622	136	3.02e-08	unnamed protein product [Vitis vinifera]
comp13376_c0	251	255582886	XP_002532215.1	633	54	245	313	375	64	35	40	54.6875	152	2.21e-10	conserved hypothetical protein [Ricinus communis] >gi|223528111|gb|EEF30184.1| conserved hypothetical protein [Ricinus communis]
comp13387_c0	467	357114250	XP_003558913.1	234	147	389	13	97	85	44	57	51.7647	204	1.83e-17	PREDICTED: uncharacterized protein LOC100832590 [Brachypodium distachyon]
comp13414_c0	252	351721388	NP_001235160.1	640	1	252	166	249	84	83	84	98.8095	429	1.71e-48	gag-protease polyprotein [Glycine max] >gi|7488678|pir||T06419 gag-proteinase polyprotein - soybean retrovirus-like element >gi|905361|gb|AAC18777.1| gag-protease polyprotein [Glycine max]
comp13417_c0	925	255549534	XP_002515819.1	320	67	924	6	287	286	180	232	62.9371	811	3.97e-104	cation efflux protein/ zinc transporter, putative [Ricinus communis] >gi|223545048|gb|EEF46561.1| cation efflux protein/ zinc transporter, putative [Ricinus communis]
comp13464_c0	297	58261174	XP_567997.1	466	1	297	112	210	99	69	88	69.697	371	1.36e-40	ubiquinol-cytochrome C reductase complex core protein 2 precursor [Cryptococcus neoformans var. neoformans JEC21] >gi|134115819|ref|XP_773623.1| hypothetical protein CNBI2370 [Cryptococcus neoformans var. neoformans B-3501A] >gi|50256249|gb|EAL18976.1| hypothetical protein CNBI2370 [Cryptococcus neoformans var. neoformans B-3501A] >gi|57230079|gb|AAW46480.1| ubiquinol-cytochrome C reductase compl…
comp13475_c0	349	302406670	XP_003001171.1	350	1	345	197	311	115	99	109	86.087	542	2.24e-66	voltage-gated potassium channel subunit beta-3 [Verticillium albo-atrum VaMs.102] >gi|261360429|gb|EEY22857.1| voltage-gated potassium channel subunit beta-3 [Verticillium albo-atrum VaMs.102]
comp13477_c0	915	553114	AAA34099.1	388	20	913	2	299	298	257	277	86.2416	1152	9.02e-155	plasma membrane H+ ATPase, partial [Nicotiana plumbaginifolia]
comp13482_c0	288	392574320	EIW67457.1	2357	1	285	495	591	97	82	86	84.5361	351	1.95e-36	hypothetical protein TREMEDRAFT_72254 [Tremella mesenterica DSM 1558]
comp13492_c0	242	297741793	CBI33098.3	161	1	240	35	114	80	71	78	88.75	394	3.91e-47	unnamed protein product [Vitis vinifera]
comp13525_c0	391	359475390	XP_002281738.2	2959	103	390	1479	1574	96	37	60	38.5417	129	3.63e-13	PREDICTED: uncharacterized protein LOC100255624 [Vitis vinifera]
comp13532_c0	237	13161535	CAC33017.1	1455	8	232	1344	1418	75	43	57	57.3333	238	8.79e-22	hypothetical protein [Antirrhinum hispanicum]
comp13546_c0	719	189197663	XP_001935169.1	228	198	530	43	142	113	42	61	37.1681	126	4.27e-06	predicted protein [Pyrenophora tritici-repentis Pt-1C-BFP] >gi|187981117|gb|EDU47743.1| predicted protein [Pyrenophora tritici-repentis Pt-1C-BFP]
comp13557_c0	214	242034881	XP_002464835.1	820	9	209	348	414	67	29	44	43.2836	168	1.11e-12	hypothetical protein SORBIDRAFT_01g027410 [Sorghum bicolor] >gi|241918689|gb|EER91833.1| hypothetical protein SORBIDRAFT_01g027410 [Sorghum bicolor]
comp13563_c0	331	58262508	XP_568664.1	666	2	331	27	136	110	105	110	95.4545	572	4.18e-68	nucleolar GTP-binding protein 1 [Cryptococcus neoformans var. neoformans JEC21] >gi|134119008|ref|XP_772007.1| hypothetical protein CNBN1850 [Cryptococcus neoformans var. neoformans B-3501A] >gi|50254611|gb|EAL17360.1| hypothetical protein CNBN1850 [Cryptococcus neoformans var. neoformans B-3501A] >gi|57230838|gb|AAW47147.1| nucleolar GTP-binding protein 1, putative [Cryptococcus neoformans var. …
comp13577_c0	256	358347272	XP_003637683.1	165	145	246	1	34	34	22	24	64.7059	115	2.7e-06	Nudix hydrolase [Medicago truncatula] >gi|355503618|gb|AES84821.1| Nudix hydrolase [Medicago truncatula] >gi|388518563|gb|AFK47343.1| unknown [Medicago truncatula]
comp13602_c0	267	170100212	XP_001881324.1	703	24	266	266	346	81	76	80	93.8272	405	6.42e-45	predicted protein [Laccaria bicolor S238N-H82] >gi|164644003|gb|EDR08254.1| predicted protein [Laccaria bicolor S238N-H82]
comp13619_c0	216	9989049	AAG10812.1	1404	3	215	638	708	71	39	52	54.9296	237	1.03e-21	Putative retroelement polyprotein [Arabidopsis thaliana]
comp13666_c0	274	392575302	EIW68436.1	362	43	258	178	249	72	33	47	45.8333	171	3.63e-13	hypothetical protein TREMEDRAFT_74284 [Tremella mesenterica DSM 1558]
comp13713_c0	507	258574997	XP_002541680.1	627	259	507	493	575	83	70	77	84.3373	394	2.82e-42	phosphoenolpyruvate carboxykinase [Uncinocarpus reesii 1704] >gi|237901946|gb|EEP76347.1| phosphoenolpyruvate carboxykinase [Uncinocarpus reesii 1704]
comp13723_c0	231	398406270	XP_003854601.1	606	103	231	533	575	43	29	37	67.4419	163	6.93e-12	hypothetical protein MYCGRDRAFT_69338 [Mycosphaerella graminicola IPO323] >gi|339474484|gb|EGP89577.1| hypothetical protein MYCGRDRAFT_69338 [Mycosphaerella graminicola IPO323]
comp13725_c0	543	255540507	XP_002511318.1	441	164	541	91	215	126	52	72	41.2698	272	7.86e-26	pentatricopeptide repeat-containing protein, putative [Ricinus communis] >gi|223550433|gb|EEF51920.1| pentatricopeptide repeat-containing protein, putative [Ricinus communis]
comp13725_c1	249	357467379	XP_003603974.1	566	3	239	177	253	79	35	52	44.3038	180	3.94e-14	Pentatricopeptide repeat-containing protein [Medicago truncatula] >gi|355493022|gb|AES74225.1| Pentatricopeptide repeat-containing protein [Medicago truncatula]
comp13737_c0	207	255585556	XP_002533468.1	1097	1	207	544	612	69	61	64	88.4058	348	1.07e-36	Ran GTPase binding protein, putative [Ricinus communis] >gi|223526683|gb|EEF28920.1| Ran GTPase binding protein, putative [Ricinus communis]
comp13737_c1	278	22770461	AAN06607.1	358	2	277	54	145	92	73	84	79.3478	413	1.22e-47	chromosome condensation regulator protein [Cicer arietinum]
comp13759_c0	445	393218047	EJD03535.1	99	118	363	17	98	82	56	72	68.2927	204	1.96e-18	fungal hydrophobin, partial [Fomitiporia mediterranea MF3/22]
comp13776_c0	666	150375638	YP_001315034.1	229	2	664	9	229	221	204	211	92.3077	854	2.17e-113	cytochrome c oxidase subunit II [Litopenaeus vannamei] >gi|98283623|gb|ABF58007.1| cytochrome c oxidase subunit II [Litopenaeus vannamei] >gi|148532182|gb|ABQ84179.1| cytochrome c oxidase subunit II [Litopenaeus vannamei]
comp13779_c0	372	361125211	EHK97262.1	571	56	304	1	82	83	51	60	61.4458	261	1.4e-24	putative N amino acid transport system protein [Glarea lozoyensis 74030]
comp13783_c0	217	326521326	BAJ96866.1	454	1	216	3	66	72	42	49	58.3333	149	2.87e-10	predicted protein [Hordeum vulgare subsp. vulgare]
comp13793_c0	221	321254242	XP_003193010.1	498	2	220	37	109	73	65	73	89.0411	344	3.6e-37	hydroxymethylglutaryl-CoA synthase [Cryptococcus gattii WM276] >gi|317459479|gb|ADV21223.1| hydroxymethylglutaryl-CoA synthase, putative [Cryptococcus gattii WM276]
comp13798_c0	562	222630959	EEE63091.1	537	21	494	200	361	162	75	109	46.2963	422	3.74e-46	hypothetical protein OsJ_17899 [Oryza sativa Japonica Group]
comp13804_c0	300	224052863	XP_002297618.1	620	49	300	532	615	84	54	68	64.2857	284	5.15e-28	predicted protein [Populus trichocarpa] >gi|222844876|gb|EEE82423.1| predicted protein [Populus trichocarpa]
comp13857_c0	233	147832740	CAN72607.1	916	2	232	740	816	77	57	64	74.026	325	1.21e-33	hypothetical protein VITISV_021339 [Vitis vinifera]
comp13863_c0	207	398390143	XP_003848532.1	541	2	205	191	258	68	57	63	83.8235	317	1.56e-33	1,3-beta-glucanosyltransferase putative [Mycosphaerella graminicola IPO323] >gi|339468407|gb|EGP83508.1| 1,3-beta-glucanosyltransferase putative [Mycosphaerella graminicola IPO323]
comp13899_c0	494	356564121	XP_003550305.1	711	1	492	72	235	164	115	137	70.122	509	4.57e-58	PREDICTED: tetratricopeptide repeat protein 7B-like [Glycine max]
comp13912_c0	419	226509102	NP_001143134.1	443	183	419	31	109	79	60	70	75.9494	363	4.94e-39	uncharacterized protein LOC100275613 [Zea mays] >gi|195614838|gb|ACG29249.1| hypothetical protein [Zea mays]
comp13927_c0	308	9758853	BAB09379.1	1223	22	306	429	520	95	39	54	41.0526	181	7.76e-14	non-LTR retroelement reverse transcriptase-like protein [Arabidopsis thaliana]
comp13930_c0	209	242038125	XP_002466457.1	474	1	207	326	394	69	51	58	73.913	279	2.33e-28	hypothetical protein SORBIDRAFT_01g008060 [Sorghum bicolor] >gi|241920311|gb|EER93455.1| hypothetical protein SORBIDRAFT_01g008060 [Sorghum bicolor]
comp13932_c0	395	224122886	XP_002330388.1	86	89	355	1	86	89	32	51	35.9551	123	2.38e-07	predicted protein [Populus trichocarpa] >gi|222871773|gb|EEF08904.1| predicted protein [Populus trichocarpa]
comp13976_c0	458	125553022	EAY98731.1	133	190	456	7	95	89	45	69	50.5618	279	3.88e-29	hypothetical protein OsI_20662 [Oryza sativa Indica Group] >gi|222632264|gb|EEE64396.1| hypothetical protein OsJ_19238 [Oryza sativa Japonica Group]
comp13982_c0	320	302398937	ADL36763.1	360	6	320	10	116	108	86	93	79.6296	458	5.17e-54	MYB domain class transcription factor [Malus x domestica]
comp13985_c0	326	242058107	XP_002458199.1	538	129	326	47	112	66	37	53	56.0606	217	7.2e-19	hypothetical protein SORBIDRAFT_03g028600 [Sorghum bicolor] >gi|241930174|gb|EES03319.1| hypothetical protein SORBIDRAFT_03g028600 [Sorghum bicolor]
comp13994_c0	735	147815265	CAN76729.1	311	458	652	19	83	65	26	36	40	129	3.32e-10	hypothetical protein VITISV_020332 [Vitis vinifera]
comp14009_c0	231	157690726	CAL69090.1	51	16	168	1	51	51	37	42	72.549	178	4.82e-16	TPA: putative 60S ribosomal protein L39 isoform 1 [Spadella cephaloptera]
comp14019_c0	291	87116463	BAE79384.1	1898	13	279	1304	1392	89	36	53	40.4494	171	1.57e-12	unnamed protein product [Ipomoea batatas]
comp14026_c0	242	67619305	XP_667639.1	172	3	242	82	161	80	60	70	75	329	2.82e-37	ribosomal protein L11 [Cryptosporidium hominis TU502] >gi|54658794|gb|EAL37411.1| ribosomal protein L11 [Cryptosporidium hominis]
comp14037_c0	262	15451259	BAB64529.1	812	1	261	144	232	89	49	68	55.0562	263	3.76e-25	TdcA1-ORF2 [Daucus carota]
comp14042_c0	299	189205509	XP_001939089.1	106	38	112	82	106	25	24	25	96	122	2.4e-07	60S ribosomal protein L36 [Pyrenophora tritici-repentis Pt-1C-BFP] >gi|330929480|ref|XP_003302655.1| hypothetical protein PTT_14563 [Pyrenophora teres f. teres 0-1] >gi|187975182|gb|EDU41808.1| 60S ribosomal protein L36 [Pyrenophora tritici-repentis Pt-1C-BFP] >gi|311321844|gb|EFQ89255.1| hypothetical protein PTT_14563 [Pyrenophora teres f. teres 0-1]
comp14048_c0	226	12322504	AAG51258.1	1152	3	224	705	778	74	40	55	54.0541	233	3.64e-21	Ty1/copia-element polyprotein [Arabidopsis thaliana]
comp14078_c0	226	378733852	EHY60311.1	566	1	213	173	243	71	55	62	77.4648	271	8.98e-27	AAT family amino acid transporter [Exophiala dermatitidis NIH/UT8656]
comp14081_c0	235	242082534	XP_002441692.1	808	1	234	314	394	81	41	55	50.6173	214	1.08e-18	hypothetical protein SORBIDRAFT_08g000820 [Sorghum bicolor] >gi|241942385|gb|EES15530.1| hypothetical protein SORBIDRAFT_08g000820 [Sorghum bicolor]
comp14094_c0	231	392572596	EIW65741.1	165	2	229	82	157	76	65	71	85.5263	354	4.1e-41	hypothetical protein TREMEDRAFT_41218 [Tremella mesenterica DSM 1558]
comp14104_c0	361	396473449	XP_003839342.1	189	1	102	137	170	34	30	34	88.2353	167	6.44e-13	similar to 60S ribosomal protein L18 [Leptosphaeria maculans JN3] >gi|312215911|emb|CBX95863.1| similar to 60S ribosomal protein L18 [Leptosphaeria maculans JN3]
comp14110_c0	284	147866223	CAN81986.1	672	5	280	324	415	92	64	78	69.5652	373	2.01e-40	hypothetical protein VITISV_001568 [Vitis vinifera]
comp14111_c0	752	108711274	ABF99069.1	649	3	707	202	437	236	127	172	53.8136	582	2.13e-67	ternary complex factor MIP1, putative, expressed [Oryza sativa Japonica Group] >gi|222625867|gb|EEE59999.1| hypothetical protein OsJ_12725 [Oryza sativa Japonica Group]
comp14112_c0	506	332322109	CCA66008.1	678	3	416	131	268	138	40	73	28.9855	202	6.6e-16	hypothetical protein [Beta vulgaris subsp. vulgaris]
comp14121_c0	209	398406997	XP_003854964.1	296	3	98	1	32	32	23	29	71.875	139	3.34e-09	ERG25, C-4 methyl sterol oxidase [Mycosphaerella graminicola IPO323] >gi|339474848|gb|EGP89940.1| ERG25, C-4 methyl sterol oxidase [Mycosphaerella graminicola IPO323]
comp14158_c0	295	224085812	XP_002307706.1	363	2	295	169	266	98	79	89	80.6122	391	3.58e-44	predicted protein [Populus trichocarpa] >gi|222857155|gb|EEE94702.1| predicted protein [Populus trichocarpa]
comp14179_c0	492	148224146	NP_001090207.1	176	1	492	7	170	164	149	159	90.8537	827	4.55e-111	ferritin heavy chain 1 a [Xenopus laevis] >gi|38014727|gb|AAH60381.1| Fth1 protein [Xenopus laevis]
comp14209_c0	387	77553024	ABA95820.1	1142	1	279	134	224	93	43	66	46.2366	199	7.36e-16	retrotransposon protein, putative, unclassified [Oryza sativa Japonica Group]
comp14275_c0	240	215701014	BAG92438.1	409	2	232	39	115	77	43	55	55.8442	218	9.34e-20	unnamed protein product [Oryza sativa Japonica Group]
comp14302_c0	976	222622126	EEE56258.1	420	294	974	186	412	227	166	196	73.1278	918	1.2e-118	hypothetical protein OsJ_05288 [Oryza sativa Japonica Group]
comp14321_c0	258	392575275	EIW68409.1	749	2	256	430	514	85	70	77	82.3529	401	2.66e-44	hypothetical protein TREMEDRAFT_74272 [Tremella mesenterica DSM 1558]
comp14325_c0	327	224134476	XP_002321833.1	487	38	325	386	481	96	67	79	69.7917	376	3.55e-41	predicted protein [Populus trichocarpa] >gi|222868829|gb|EEF05960.1| predicted protein [Populus trichocarpa]
comp14325_c1	206	224134480	XP_002321834.1	490	5	202	326	393	68	42	50	61.7647	221	4.35e-20	predicted protein [Populus trichocarpa] >gi|222868830|gb|EEF05961.1| predicted protein [Populus trichocarpa]
comp14333_c0	312	258568240	XP_002584864.1	388	7	312	222	319	102	55	64	53.9216	256	7.1e-25	predicted protein [Uncinocarpus reesii 1704] >gi|237906310|gb|EEP80711.1| predicted protein [Uncinocarpus reesii 1704]
comp14352_c0	579	359491569	XP_002280533.2	2234	1	363	826	946	121	52	75	42.9752	251	2.37e-34	PREDICTED: uncharacterized protein LOC100266246 [Vitis vinifera]
comp14356_c0	440	125602253	EAZ41578.1	362	11	439	96	238	143	86	103	60.1399	454	9.9e-53	hypothetical protein OsJ_26112 [Oryza sativa Japonica Group]
comp14385_c0	333	255542716	XP_002512421.1	987	10	333	766	893	128	73	93	57.0312	282	3.29e-27	conserved hypothetical protein [Ricinus communis] >gi|223548382|gb|EEF49873.1| conserved hypothetical protein [Ricinus communis]
comp14385_c1	273	222629000	EEE61132.1	531	3	245	270	350	81	44	56	54.321	224	4.81e-20	hypothetical protein OsJ_15066 [Oryza sativa Japonica Group]
comp14400_c0	262	4539462	CAB39942.1	473	47	184	326	371	46	20	28	43.4783	117	8.88e-06	putative protein [Arabidopsis thaliana] >gi|7267871|emb|CAB78214.1| putative protein [Arabidopsis thaliana]
comp14409_c0	448	297791661	XP_002863715.1	682	210	338	627	669	43	24	30	55.814	154	6.14e-10	zinc finger family protein [Arabidopsis lyrata subsp. lyrata] >gi|297309550|gb|EFH39974.1| zinc finger family protein [Arabidopsis lyrata subsp. lyrata]
comp14423_c0	303	255549548	XP_002515826.1	1339	19	186	292	348	57	25	38	43.8596	137	4.44e-08	peroxisomal abc transporter, putative [Ricinus communis] >gi|223545055|gb|EEF46568.1| peroxisomal abc transporter, putative [Ricinus communis]
comp14425_c0	371	326497717	BAK05948.1	131	80	361	21	129	109	53	63	48.6239	163	1.58e-12	predicted protein [Hordeum vulgare subsp. vulgare]
comp14430_c0	247	350540638	NP_001234521.1	365	2	244	234	315	82	57	67	69.5122	298	4.19e-31	BURP domain-containing protein precursor [Solanum lycopersicum] >gi|188474281|gb|ACD49740.1| BURP domain-containing protein [Solanum lycopersicum]
comp14438_c0	294	242093834	XP_002437407.1	1609	33	290	438	534	100	46	58	46	180	9.38e-14	hypothetical protein SORBIDRAFT_10g026363 [Sorghum bicolor] >gi|241915630|gb|EER88774.1| hypothetical protein SORBIDRAFT_10g026363 [Sorghum bicolor]
comp14454_c0	276	393230600	EJD38203.1	276	1	276	184	275	92	85	90	92.3913	464	4.21e-56	P-loop containing nucleoside triphosphate hydrolase protein, partial [Auricularia delicata TFB-10046 SS5]
comp14472_c0	229	358379194	EHK16875.1	435	3	227	229	301	75	52	63	69.3333	283	6.39e-29	hypothetical protein TRIVIDRAFT_87714 [Trichoderma virens Gv29-8]
comp14477_c0	308	392576428	EIW69559.1	546	1	306	171	272	102	74	90	72.549	372	1.72e-40	hypothetical protein TREMEDRAFT_73902 [Tremella mesenterica DSM 1558]
comp14493_c0	206	242092390	XP_002436685.1	474	35	202	198	253	56	46	52	82.1429	286	2.57e-29	hypothetical protein SORBIDRAFT_10g007020 [Sorghum bicolor] >gi|241914908|gb|EER88052.1| hypothetical protein SORBIDRAFT_10g007020 [Sorghum bicolor]
comp14516_c0	236	242066368	XP_002454473.1	151	3	236	30	134	105	41	49	39.0476	115	2.04e-06	hypothetical protein SORBIDRAFT_04g031760 [Sorghum bicolor] >gi|241934304|gb|EES07449.1| hypothetical protein SORBIDRAFT_04g031760 [Sorghum bicolor]
comp14542_c0	469	242046984	XP_002461238.1	414	6	467	231	384	154	118	134	76.6234	648	6.25e-81	hypothetical protein SORBIDRAFT_02g043380 [Sorghum bicolor] >gi|241924615|gb|EER97759.1| hypothetical protein SORBIDRAFT_02g043380 [Sorghum bicolor]
comp14575_c0	334	357143141	XP_003572817.1	224	11	277	3	106	104	51	61	49.0385	216	1.01e-19	PREDICTED: uncharacterized protein LOC100824307 [Brachypodium distachyon]
comp14598_c0	286	18087533	AAL58900.1	749	47	280	492	568	78	30	47	38.4615	166	5.06e-12	AT3g06940/F17A9_9 [Arabidopsis thaliana] >gi|17380908|gb|AAL36266.1| putative mudrA protein [Arabidopsis thaliana] >gi|20855902|gb|AAM26637.1| AT3g06940/F17A9_9 [Arabidopsis thaliana] >gi|28393919|gb|AAO42367.1| putative mudrA protein [Arabidopsis thaliana]
comp14602_c0	254	336376718	EGO05053.1	464	6	242	260	338	79	51	62	64.557	183	9.57e-15	hypothetical protein SERLA73DRAFT_82588 [Serpula lacrymans var. lacrymans S7.3]
comp14602_c1	306	169844978	XP_001829209.1	380	121	240	127	166	40	24	34	60	123	1.75e-06	hypothetical protein CC1G_06546 [Coprinopsis cinerea okayama7#130] >gi|116509640|gb|EAU92535.1| hypothetical protein CC1G_06546 [Coprinopsis cinerea okayama7#130]
comp14612_c0	391	389746181	EIM87361.1	358	2	352	243	358	117	98	108	83.7607	527	7.43e-64	fructose-bisphosphate aldolase [Stereum hirsutum FP-91666 SS1]
comp14623_c0	539	224082612	XP_002306764.1	380	1	393	220	361	150	70	88	46.6667	252	2.89e-23	predicted protein [Populus trichocarpa] >gi|222856213|gb|EEE93760.1| predicted protein [Populus trichocarpa]
comp14638_c0	258	147782985	CAN62019.1	692	95	250	82	133	52	21	33	40.3846	105	2.74e-06	hypothetical protein VITISV_019561 [Vitis vinifera]
comp14657_c0	219	304274132	ADM18813.1	211	1	219	22	94	73	71	73	97.2603	369	7.23e-43	succinate dehydrogenase flavoprotein subunit [Sporidiobolus salmonicolor]
comp14658_c0	253	326526731	BAK00754.1	341	1	249	74	158	86	46	54	53.4884	217	7.69e-20	predicted protein [Hordeum vulgare subsp. vulgare]
comp14676_c0	393	218198442	EEC80869.1	795	1	393	121	251	131	72	86	54.9618	275	4.95e-26	hypothetical protein OsI_23491 [Oryza sativa Indica Group]
comp14676_c1	246	397787622	AFO66527.1	950	2	244	127	206	81	43	56	53.0864	179	8.01e-14	putative receptor-like protein 53 kinase [Brassica napus]
comp14711_c0	223	302656993	XP_003020230.1	288	1	222	106	179	74	63	70	85.1351	328	5.41e-36	hypothetical protein TRV_05694 [Trichophyton verrucosum HKI 0517] >gi|291184041|gb|EFE39612.1| hypothetical protein TRV_05694 [Trichophyton verrucosum HKI 0517]
comp14713_c0	270	58266190	XP_570251.1	749	7	261	640	736	100	46	59	46	144	3.6e-09	hypothetical protein CND02530 [Cryptococcus neoformans var. neoformans JEC21] >gi|134111020|ref|XP_775974.1| hypothetical protein CNBD3810 [Cryptococcus neoformans var. neoformans B-3501A] >gi|50258640|gb|EAL21327.1| hypothetical protein CNBD3810 [Cryptococcus neoformans var. neoformans B-3501A] >gi|57226484|gb|AAW42944.1| hypothetical protein CND02530 [Cryptococcus neoformans var. neoformans JEC…
comp14728_c0	219	356504338	XP_003520953.1	226	2	214	33	103	71	49	60	69.0141	272	2.2e-28	PREDICTED: probable glutathione S-transferase-like [Glycine max]
comp14752_c0	222	380485988	CCF39003.1	263	1	219	89	161	73	41	54	56.1644	251	5.1e-25	thermostable beta-glucosidase B, partial [Colletotrichum higginsianum]
comp14757_c0	464	357136254	XP_003569720.1	361	3	293	265	361	97	66	80	68.0412	403	4.76e-45	PREDICTED: GDSL esterase/lipase At5g45670-like [Brachypodium distachyon]
comp14780_c0	298	356510070	XP_003523763.1	537	3	266	1	103	103	55	70	53.3981	181	3.95e-14	PREDICTED: multidrug and toxin extrusion protein 1-like [Glycine max]
comp14797_c0	226	259479441	CBF69665.1	611	28	216	1	63	63	42	53	66.6667	252	5.61e-24	TPA: putative coronin homolog (Eurofung) [Aspergillus nidulans FGSC A4]
comp14798_c0	683	359490850	XP_002269539.2	1252	211	657	610	754	152	79	103	51.9737	357	1.88e-35	PREDICTED: ABC transporter B family member 19-like [Vitis vinifera]
comp14802_c0	291	342872691	EGU75011.1	300	1	228	21	97	77	50	61	64.9351	258	1.89e-25	hypothetical protein FOXB_14483 [Fusarium oxysporum Fo5176]
comp14832_c0	892	222622371	EEE56503.1	1146	342	632	614	706	97	60	73	61.8557	303	2.61e-53	hypothetical protein OsJ_05771 [Oryza sativa Japonica Group]
comp14838_c1	316	226494195	NP_001148212.1	242	2	223	140	213	74	68	74	91.8919	398	2.41e-46	WRKY23 - superfamily of TFs having WRKY and zinc finger domains [Zea mays] >gi|195616724|gb|ACG30192.1| WRKY23 - superfamily of TFs having WRKY and zinc finger domains [Zea mays]
comp14846_c0	324	320165083	EFW41982.1	214	1	321	23	129	107	76	89	71.028	361	4.57e-41	40S ribosomal protein S8 [Capsaspora owczarzaki ATCC 30864]
comp14848_c0	476	255561889	XP_002521953.1	1533	1	474	150	307	158	153	156	96.8354	836	1.43e-101	myosin XI, putative [Ricinus communis] >gi|223538757|gb|EEF40357.1| myosin XI, putative [Ricinus communis]
comp14854_c0	235	398399036	XP_003852975.1	195	11	235	19	93	75	41	50	54.6667	174	2.27e-14	hypothetical protein MYCGRDRAFT_41315 [Mycosphaerella graminicola IPO323] >gi|339472857|gb|EGP87951.1| hypothetical protein MYCGRDRAFT_41315 [Mycosphaerella graminicola IPO323]
comp14856_c0	262	398394427	XP_003850672.1	485	3	260	96	181	86	76	79	88.3721	409	4.19e-46	hypothetical protein MYCGRDRAFT_100728 [Mycosphaerella graminicola IPO323] >gi|339470551|gb|EGP85648.1| hypothetical protein MYCGRDRAFT_100728 [Mycosphaerella graminicola IPO323]
comp14866_c0	695	58258679	XP_566752.1	397	125	694	208	397	190	171	182	90	846	1.58e-109	methionine adenosyltransferase [Cryptococcus neoformans var. neoformans JEC21] >gi|134106751|ref|XP_777917.1| hypothetical protein CNBA3860 [Cryptococcus neoformans var. neoformans B-3501A] >gi|50260617|gb|EAL23270.1| hypothetical protein CNBA3860 [Cryptococcus neoformans var. neoformans B-3501A] >gi|57222889|gb|AAW40933.1| methionine adenosyltransferase, putative [Cryptococcus neoformans var. ne…
comp14889_c0	281	357132838	XP_003568035.1	536	4	279	108	221	114	47	63	41.2281	187	5.44e-15	PREDICTED: uncharacterized protein LOC100838385 [Brachypodium distachyon]
comp14903_c0	267	40809676	CAB42651.2	494	2	181	198	257	60	50	55	83.3333	276	1.34e-27	putative preprolegumain [Nicotiana tabacum]
comp14907_c0	225	398410598	XP_003856647.1	728	3	224	545	618	74	69	72	93.2432	345	1e-36	acetate--CoA ligase [Mycosphaerella graminicola IPO323] >gi|339476532|gb|EGP91623.1| acetyl-coenzyme A synthetase [Mycosphaerella graminicola IPO323]
comp14911_c0	249	330943640	XP_003306235.1	638	2	247	506	583	82	48	61	58.5366	245	5.39e-23	hypothetical protein PTT_19351 [Pyrenophora teres f. teres 0-1] >gi|311316308|gb|EFQ85665.1| hypothetical protein PTT_19351 [Pyrenophora teres f. teres 0-1]
comp14923_c0	219	392575074	EIW68208.1	434	1	219	52	124	73	60	68	82.1918	330	1.76e-35	hypothetical protein TREMEDRAFT_71942 [Tremella mesenterica DSM 1558]
comp14939_c0	258	224086825	XP_002307975.1	457	15	233	173	243	73	30	44	41.0959	135	3.35e-08	predicted protein [Populus trichocarpa] >gi|222853951|gb|EEE91498.1| predicted protein [Populus trichocarpa]
comp14939_c1	340	357111095	XP_003557350.1	463	11	340	251	357	110	57	73	51.8182	224	6.33e-20	PREDICTED: UDP-glycosyltransferase 76C2-like [Brachypodium distachyon]
comp14951_c0	289	125544620	EAY90759.1	102	3	239	24	102	79	48	61	60.7595	299	2.6e-33	hypothetical protein OsI_12362 [Oryza sativa Indica Group]
comp14966_c0	323	354549904	AER27894.1	362	3	323	210	316	107	97	102	90.6542	488	2.15e-58	cytochrome oxidase subunit 1 [Phialocephala europaea]
comp14980_c0	452	357528936	AET80688.1	438	84	452	317	434	123	48	70	39.0244	248	7.17e-23	putrescine hydroxycinnamoyl transferase [Nicotiana attenuata]
comp14985_c0	223	390601087	EIN10481.1	388	1	222	129	204	76	48	60	63.1579	235	2.1e-22	60S ribosomal protein L3 [Punctularia strigosozonata HHB-11173 SS5]
comp14997_c0	357	77548668	ABA91465.1	405	91	357	300	400	101	58	68	57.4257	273	7.16e-27	Lipase family protein [Oryza sativa Japonica Group] >gi|125576206|gb|EAZ17428.1| hypothetical protein OsJ_32952 [Oryza sativa Japonica Group] >gi|346703395|emb|CBX25492.1| hypothetical_protein [Oryza glaberrima]
comp15001_c0	364	225448341	XP_002266768.1	525	12	362	10	123	117	55	83	47.0085	291	5.05e-29	PREDICTED: cytochrome P450 734A1 [Vitis vinifera] >gi|297736650|emb|CBI25521.3| unnamed protein product [Vitis vinifera]
comp15001_c1	235	357112379	XP_003557986.1	513	2	229	119	194	76	60	72	78.9474	342	7.89e-37	PREDICTED: cytochrome P450 734A1-like [Brachypodium distachyon]
comp15033_c0	244	122894037	YP_001004233.1	393	1	243	56	136	81	81	81	100	428	1.03e-49	NADH-plastoquinone oxidoreductase subunit 7 [Ranunculus macranthus] >gi|218527791|sp|A1XGT5.1|NDHH_RANMC RecName: Full=NAD(P)H-quinone oxidoreductase subunit H, chloroplastic; AltName: Full=NAD(P)H dehydrogenase subunit H; AltName: Full=NADH-plastoquinone oxidoreductase 49 kDa subunit; AltName: Full=NADH-plastoquinone oxidoreductase subunit H >gi|85540851|gb|ABC70803.1| NADH-plastoquinone oxidore…
comp15035_c0	322	224085083	XP_002307483.1	1083	3	317	392	496	105	72	87	68.5714	376	5.82e-40	predicted protein [Populus trichocarpa] >gi|222856932|gb|EEE94479.1| predicted protein [Populus trichocarpa]
comp15035_c1	331	302142780	CBI19983.3	943	1	330	346	455	110	80	89	72.7273	393	2.77e-42	unnamed protein product [Vitis vinifera]
comp15075_c0	349	302141866	CBI19069.3	742	53	193	49	92	47	29	34	61.7021	142	1.41e-08	unnamed protein product [Vitis vinifera]
comp15080_c0	219	321254389	XP_003193056.1	573	4	192	13	75	63	43	47	68.254	186	3.5e-15	tryptophan 2,3-dioxygenase [Cryptococcus gattii WM276] >gi|317459525|gb|ADV21269.1| tryptophan 2,3-dioxygenase, putative [Cryptococcus gattii WM276]
comp15082_c0	320	170292	AAA34096.1	440	3	320	9	115	107	94	100	87.8505	422	6.02e-48	plasma membrane H+ ATPase, partial [Nicotiana plumbaginifolia]
comp15082_c1	265	224082410	XP_002306684.1	200	2	265	54	141	88	81	85	92.0455	422	1.09e-50	autoinhibited H+ ATPase [Populus trichocarpa] >gi|222856133|gb|EEE93680.1| autoinhibited H+ ATPase [Populus trichocarpa]
comp15116_c0	222	147768439	CAN73637.1	2301	1	210	1935	2004	70	44	57	62.8571	278	4.8e-27	hypothetical protein VITISV_020488 [Vitis vinifera]
comp15118_c0	218	14550183	AAK67169.1	266	1	216	118	189	72	64	69	88.8889	356	2.17e-40	NADP-dependent mannitol dehydrogenase [Passalora fulva]
comp15126_c0	232	296089662	CBI39481.3	437	7	147	1	47	47	30	35	63.8298	157	2.44e-11	unnamed protein product [Vitis vinifera]
comp15164_c0	214	189197259	XP_001934967.1	620	3	212	412	481	70	49	57	70	260	3.59e-25	peptide transporter PTR2-A [Pyrenophora tritici-repentis Pt-1C-BFP] >gi|187980915|gb|EDU47541.1| peptide transporter PTR2-A [Pyrenophora tritici-repentis Pt-1C-BFP]
comp15171_c0	236	378732615	EHY59074.1	635	3	236	487	564	78	46	57	58.9744	254	2.7e-24	amylosucrase [Exophiala dermatitidis NIH/UT8656]
comp15207_c0	398	147862329	CAN79755.1	665	181	396	260	331	72	37	50	51.3889	195	2.03e-15	hypothetical protein VITISV_006035 [Vitis vinifera]
comp15212_c0	602	389641263	XP_003718264.1	150	232	438	19	87	69	42	48	60.8696	137	1.83e-08	hypothetical protein MGG_00737 [Magnaporthe oryzae 70-15] >gi|351640817|gb|EHA48680.1| hypothetical protein MGG_00737 [Magnaporthe oryzae 70-15]
comp15215_c0	238	392572824	EIW65968.1	163	11	157	115	163	49	35	39	71.4286	170	5.73e-14	hypothetical protein TREMEDRAFT_66057 [Tremella mesenterica DSM 1558]
comp15215_c1	287	392572824	EIW65968.1	163	2	241	37	116	80	56	66	70	297	2.75e-32	hypothetical protein TREMEDRAFT_66057 [Tremella mesenterica DSM 1558]
comp15236_c0	246	389740240	EIM81431.1	345	2	196	54	118	65	53	57	81.5385	252	9.33e-25	family A1 protease [Stereum hirsutum FP-91666 SS1]
comp15252_c1	472	296086082	CBI31523.3	380	51	470	109	248	140	84	106	60	450	8.55e-52	unnamed protein product [Vitis vinifera]
comp15265_c0	238	315053883	XP_003176316.1	531	4	237	123	200	78	59	72	75.641	333	1.45e-35	1,3-beta-glucanosyltransferase gel4 [Arthroderma gypseum CBS 118893] >gi|311338162|gb|EFQ97364.1| 1,3-beta-glucanosyltransferase gel4 [Arthroderma gypseum CBS 118893]
comp15266_c0	283	242082275	XP_002445906.1	846	145	282	707	748	46	17	24	36.9565	102	5.82e-06	hypothetical protein SORBIDRAFT_07g027820 [Sorghum bicolor] >gi|241942256|gb|EES15401.1| hypothetical protein SORBIDRAFT_07g027820 [Sorghum bicolor]
comp15269_c0	262	389749278	EIM90455.1	234	3	260	99	184	87	59	67	67.8161	283	1.12e-29	hypothetical protein STEHIDRAFT_145530 [Stereum hirsutum FP-91666 SS1]
comp15293_c0	311	393212709	EJC98208.1	209	1	237	6	85	80	44	58	55	240	2.35e-23	hypothetical protein FOMMEDRAFT_143304 [Fomitiporia mediterranea MF3/22]
comp15304_c0	344	255571804	XP_002526845.1	789	1	246	709	784	82	48	56	58.5366	242	6.9e-22	conserved hypothetical protein [Ricinus communis] >gi|223533849|gb|EEF35580.1| conserved hypothetical protein [Ricinus communis]
comp15304_c1	284	359493103	XP_002267136.2	211	2	283	36	144	109	55	64	50.4587	228	1.2e-21	PREDICTED: uncharacterized protein LOC100260631 [Vitis vinifera]
comp15326_c0	235	378725986	EHY52445.1	570	1	234	163	240	78	58	64	74.359	308	5.81e-32	cyclohexanone monooxygenase [Exophiala dermatitidis NIH/UT8656]
comp15353_c0	345	390604772	EIN14163.1	406	1	141	19	65	47	38	41	80.8511	203	4.14e-17	hypothetical protein PUNSTDRAFT_95790 [Punctularia strigosozonata HHB-11173 SS5]
comp15365_c0	239	261865347	ACY01928.1	1583	6	239	540	620	82	41	53	50	183	2.35e-14	hypothetical protein [Beta vulgaris]
comp15400_c0	266	351726818	NP_001238419.1	204	1	264	105	192	88	74	87	84.0909	416	7.75e-50	uncharacterized protein LOC100305898 [Glycine max] >gi|255626917|gb|ACU13803.1| unknown [Glycine max]
comp15401_c0	357	398412806	XP_003857721.1	441	1	357	94	212	119	78	94	65.5462	417	4.33e-47	hypothetical protein MYCGRDRAFT_102047 [Mycosphaerella graminicola IPO323] >gi|339477606|gb|EGP92697.1| hypothetical protein MYCGRDRAFT_102047 [Mycosphaerella graminicola IPO323]
comp15404_c0	239	328899610	AEB54642.1	123	1	225	49	123	75	59	67	78.6667	304	3.81e-34	ribosomal protein L35 [Procambarus clarkii]
comp15407_c0	220	398397675	XP_003852295.1	536	2	220	97	169	73	61	68	83.5616	322	4.13e-34	hypothetical protein MYCGRDRAFT_72460 [Mycosphaerella graminicola IPO323] >gi|339472176|gb|EGP87271.1| hypothetical protein MYCGRDRAFT_72460 [Mycosphaerella graminicola IPO323]
comp15432_c0	205	336467925	EGO56088.1	342	1	204	246	313	68	53	63	77.9412	291	1.87e-30	hypothetical protein NEUTE1DRAFT_117207 [Neurospora tetrasperma FGSC 2508] >gi|350289837|gb|EGZ71062.1| alpha-L-arabinofuranosidase B [Neurospora tetrasperma FGSC 2509]
comp15434_c0	324	392579267	EIW72394.1	1173	1	324	1009	1116	108	88	101	81.4815	482	2.78e-54	hypothetical protein TREMEDRAFT_70709 [Tremella mesenterica DSM 1558]
comp15473_c0	293	321254508	XP_003193097.1	111	32	286	27	111	85	71	77	83.5294	364	4.89e-43	hypothetical protein CGB_C8730W [Cryptococcus gattii WM276] >gi|317459566|gb|ADV21310.1| conserved hypothetical protein [Cryptococcus gattii WM276]
comp15480_c0	511	398409668	XP_003856299.1	356	2	496	148	316	169	119	144	70.4142	390	5.12e-43	hypothetical protein MYCGRDRAFT_102441 [Mycosphaerella graminicola IPO323] >gi|339476184|gb|EGP91275.1| hypothetical protein MYCGRDRAFT_102441 [Mycosphaerella graminicola IPO323]
comp15490_c0	292	109289919	AAP45172.2	552	98	292	28	93	66	49	62	74.2424	295	6.43e-30	hypothetical protein SBB1_14t00021 [Solanum bulbocastanum]
comp15514_c0	374	321254823	XP_003193210.1	600	3	374	245	369	125	93	108	74.4	434	1.54e-48	monosaccharide transporter [Cryptococcus gattii WM276] >gi|317459679|gb|ADV21423.1| Monosaccharide transporter, putative [Cryptococcus gattii WM276]
comp15521_c0	368	388504466	AFK40299.1	370	49	366	136	241	106	97	103	91.5094	530	2.96e-64	unknown [Lotus japonicus]
comp15523_c0	492	147765512	CAN78111.1	520	2	226	9	81	75	44	62	58.6667	169	8.81e-12	hypothetical protein VITISV_004429 [Vitis vinifera]
comp15532_c0	276	392573861	EIW66999.1	1806	3	275	1482	1572	91	83	89	91.2088	458	4.89e-51	glucan synthase [Tremella mesenterica DSM 1558]
comp15546_c0	212	148699251	EDL31198.1	150	15	212	10	74	66	44	55	66.6667	226	2.79e-22	mCG18481, isoform CRA_b [Mus musculus]
comp15550_c0	768	125602400	EAZ41725.1	212	188	577	82	211	130	65	95	50	345	1.39e-36	hypothetical protein OsJ_26264 [Oryza sativa Japonica Group]
comp15564_c0	241	321259177	XP_003194309.1	152	1	240	15	94	80	63	73	78.75	355	2.08e-41	nucleoside-diphosphate kinase [Cryptococcus gattii WM276] >gi|317460780|gb|ADV22522.1| Nucleoside-diphosphate kinase, putative [Cryptococcus gattii WM276]
comp15568_c0	247	357116572	XP_003560054.1	592	2	247	176	268	93	30	43	32.2581	119	4.69e-06	PREDICTED: probable inactive receptor kinase At5g67200-like [Brachypodium distachyon]
comp15572_c0	202	255083274	XP_002504623.1	150	5	199	5	67	65	32	47	49.2308	154	6.76e-12	predicted protein [Micromonas sp. RCC299] >gi|226519891|gb|ACO65881.1| predicted protein [Micromonas sp. RCC299]
comp15576_c0	360	398406256	XP_003854594.1	374	2	358	109	227	119	118	118	99.1597	639	1.42e-80	pyruvate dehydrogenase E1, beta subunit [Mycosphaerella graminicola IPO323] >gi|339474477|gb|EGP89570.1| pyruvate dehydrogenase E1, BETA subunit [Mycosphaerella graminicola IPO323]
comp15644_c0	597	116191113	XP_001221369.1	749	3	596	349	550	203	141	165	69.4581	725	3.46e-88	hypothetical protein CHGG_05274 [Chaetomium globosum CBS 148.51] >gi|121787226|sp|Q2H7U1.1|KATG_CHAGB RecName: Full=Catalase-peroxidase; Short=CP; AltName: Full=Peroxidase/catalase >gi|88181187|gb|EAQ88655.1| hypothetical protein CHGG_05274 [Chaetomium globosum CBS 148.51] >gi|397310246|gb|AFO38180.1| bifunctional catalase/peroxidase [Chaetomium globosum]
comp15650_c0	367	147798886	CAN74964.1	1248	3	365	849	973	125	101	114	80.8	559	1.77e-64	hypothetical protein VITISV_006810 [Vitis vinifera]
comp15667_c0	219	82618827	ABB85207.1	172	5	175	87	143	57	26	35	45.614	119	4.89e-07	NBS-LRR type disease resistance protein [Cicer arietinum]
comp15684_c0	359	398404193	XP_003853563.1	201	2	334	90	201	112	105	110	93.75	541	3.74e-68	40S ribosomal protein S7 [Mycosphaerella graminicola IPO323] >gi|339473445|gb|EGP88539.1| hypothetical protein MYCGRDRAFT_104028 [Mycosphaerella graminicola IPO323]
comp15725_c0	355	58268246	XP_571279.1	568	1	354	265	382	118	116	117	98.3051	614	6.75e-75	rRNA modification-related protein [Cryptococcus neoformans var. neoformans JEC21] >gi|338818313|sp|P0CP26.1|NOP58_CRYNJ RecName: Full=Nucleolar protein 58 >gi|57227514|gb|AAW43972.1| rRNA modification-related protein, putative [Cryptococcus neoformans var. neoformans JEC21]
comp15744_c0	229	321253797	XP_003192853.1	216	9	227	6	76	73	43	59	58.9041	229	3.62e-22	elongation factor 1-beta (ef-1-beta) [Cryptococcus gattii WM276] >gi|317459322|gb|ADV21066.1| Elongation factor 1-beta (ef-1-beta), putative [Cryptococcus gattii WM276]
comp15800_c0	260	398411369	XP_003857024.1	286	1	255	92	163	85	45	57	52.9412	215	1.01e-19	hypothetical protein MYCGRDRAFT_90001 [Mycosphaerella graminicola IPO323] >gi|339476909|gb|EGP92000.1| hypothetical protein MYCGRDRAFT_90001 [Mycosphaerella graminicola IPO323]
comp15814_c0	429	398403959	XP_003853446.1	461	85	429	340	455	116	56	73	48.2759	263	5.84e-25	hypothetical protein MYCGRDRAFT_71033 [Mycosphaerella graminicola IPO323] >gi|339473328|gb|EGP88422.1| hypothetical protein MYCGRDRAFT_71033 [Mycosphaerella graminicola IPO323]
comp15831_c0	254	398398615	XP_003852765.1	510	4	252	201	283	83	64	73	77.1084	346	2.77e-37	glucokinase [Mycosphaerella graminicola IPO323] >gi|339472646|gb|EGP87741.1| glucokinase [Mycosphaerella graminicola IPO323]
comp15833_c0	1148	225426354	XP_002266149.1	393	139	969	87	376	292	161	209	55.137	673	1.91e-81	PREDICTED: probable protein phosphatase 2C 8 [Vitis vinifera] >gi|297742328|emb|CBI34477.3| unnamed protein product [Vitis vinifera]
comp15837_c0	350	356557511	XP_003547059.1	2185	2	301	1979	2078	100	69	84	69	382	2.74e-40	PREDICTED: uncharacterized protein LOC100805306 [Glycine max]
comp15839_c0	608	2244916	CAB10338.1	655	21	296	80	171	97	28	48	28.866	138	1.32e-07	hypothetical protein [Arabidopsis thaliana] >gi|7268308|emb|CAB78602.1| hypothetical protein [Arabidopsis thaliana]
comp15851_c0	204	170113507	XP_001887953.1	222	1	204	15	82	68	54	62	79.4118	229	3.47e-22	predicted protein [Laccaria bicolor S238N-H82] >gi|164637120|gb|EDR01408.1| predicted protein [Laccaria bicolor S238N-H82]
comp15871_c0	503	9945082	AAG03119.1	1254	4	372	280	399	123	30	61	24.3902	131	7.24e-07	F5A9.24 [Arabidopsis thaliana]
comp15892_c0	538	242080231	XP_002444884.1	226	60	503	64	221	158	71	100	44.9367	311	1.72e-32	hypothetical protein SORBIDRAFT_07g000860 [Sorghum bicolor] >gi|241941234|gb|EES14379.1| hypothetical protein SORBIDRAFT_07g000860 [Sorghum bicolor]
comp15904_c0	255	58263150	XP_568985.1	92	2	82	66	92	27	27	27	100	132	6.28e-09	60s ribosomal protein l37a [Cryptococcus neoformans var. neoformans JEC21] >gi|134107788|ref|XP_777505.1| hypothetical protein CNBB0790 [Cryptococcus neoformans var. neoformans B-3501A] >gi|50260197|gb|EAL22858.1| hypothetical protein CNBB0790 [Cryptococcus neoformans var. neoformans B-3501A] >gi|57223635|gb|AAW41678.1| 60s ribosomal protein l37a, putative [Cryptococcus neoformans var. neoformans…
comp15981_c0	515	225434919	XP_002283488.1	391	1	471	4	186	185	113	136	61.0811	563	3.26e-68	PREDICTED: inactive rhomboid protein 1 [Vitis vinifera]
comp15984_c0	243	359485707	XP_002281337.2	544	3	242	147	231	85	50	60	58.8235	229	7.33e-21	PREDICTED: BTB/POZ domain-containing protein At3g22104-like [Vitis vinifera] >gi|296081221|emb|CBI17965.3| unnamed protein product [Vitis vinifera]
comp16001_c0	501	356520555	XP_003528927.1	397	1	297	291	389	99	68	80	68.6869	375	1.61e-40	PREDICTED: flavin-containing monooxygenase YUCCA2-like [Glycine max]
comp16003_c0	212	2935342	AAC05093.1	513	10	210	74	140	67	40	56	59.7015	229	3.67e-21	steroid 22-alpha-hydroxylase [Arabidopsis thaliana]
comp16005_c0	396	388583538	EIM23839.1	85	101	385	1	85	95	60	69	63.1579	254	2.87e-26	ribosomal protein L38e [Wallemia sebi CBS 633.66]
comp16007_c0	215	296425854	XP_002842453.1	499	1	213	79	149	71	62	70	87.3239	354	1.17e-38	hypothetical protein [Tuber melanosporum Mel28] >gi|295638721|emb|CAZ86644.1| unnamed protein product [Tuber melanosporum]
comp16009_c0	201	116191675	XP_001221650.1	116	32	199	54	109	56	39	47	69.6429	206	8.18e-20	conserved hypothetical protein [Chaetomium globosum CBS 148.51] >gi|88181468|gb|EAQ88936.1| conserved hypothetical protein [Chaetomium globosum CBS 148.51]
comp16032_c0	1209	46091271	BAD13764.1	626	104	1207	1	367	368	281	320	76.3587	1536	0	exo-1,3-beta-glucanase [Lilium longiflorum]
comp16044_c0	418	357124607	XP_003563989.1	448	1	411	297	430	143	70	90	48.951	306	4.81e-31	PREDICTED: uncharacterized protein LOC100841206 [Brachypodium distachyon]
comp16065_c0	449	359477243	XP_003631952.1	585	2	448	160	322	163	90	115	55.2147	482	5.46e-55	PREDICTED: putative pectinesterase/pectinesterase inhibitor 28-like [Vitis vinifera]
comp16071_c0	248	398393826	XP_003850372.1	124	3	248	17	98	82	68	75	82.9268	353	1.9e-41	hypothetical protein MYCGRDRAFT_61630 [Mycosphaerella graminicola IPO323] >gi|339470250|gb|EGP85348.1| hypothetical protein MYCGRDRAFT_61630 [Mycosphaerella graminicola IPO323]
comp16125_c0	827	321261800	XP_003195619.1	675	19	414	514	648	138	101	109	73.1884	458	2.32e-49	polyadenylate-binding protein [Cryptococcus gattii WM276] >gi|317462093|gb|ADV23832.1| polyadenylate-binding protein, putative [Cryptococcus gattii WM276]
comp16129_c0	1688	345294349	AEN83506.1	218	250	501	134	216	84	54	71	64.2857	285	2.25e-26	chalcone isomerase [Solanum tuberosum]
comp16135_c0	233	357153628	XP_003576514.1	1318	76	210	533	577	45	28	35	62.2222	147	8.37e-14	PREDICTED: DNA mismatch repair protein Msh6-1-like [Brachypodium distachyon]
comp16140_c0	486	224085694	XP_002307668.1	475	1	486	179	340	162	129	147	79.6296	729	4.21e-92	predicted protein [Populus trichocarpa] >gi|222857117|gb|EEE94664.1| predicted protein [Populus trichocarpa]
comp16146_c0	282	396477462	XP_003840273.1	449	1	282	266	359	94	81	90	86.1702	367	3.01e-40	similar to delta(12) fatty acid desaturase [Leptosphaeria maculans JN3] >gi|312216845|emb|CBX96794.1| similar to delta(12) fatty acid desaturase [Leptosphaeria maculans JN3]
comp16167_c0	235	392573130	EIW66271.1	596	6	233	398	473	76	65	71	85.5263	342	1.09e-36	hypothetical protein TREMEDRAFT_72410 [Tremella mesenterica DSM 1558]
comp16175_c0	292	121501704	ABM55245.1	1399	16	291	749	838	92	41	53	44.5652	200	2.24e-16	transposon-like protein [Beta vulgaris]
comp16188_c0	925	4335720	AAD17398.1	1225	290	901	961	1170	210	50	103	23.8095	167	1.48e-10	putative non-LTR retroelement reverse transcriptase [Arabidopsis thaliana]
comp16270_c0	1030	297737195	CBI26396.3	667	1	798	85	348	266	114	164	42.8571	493	5.07e-71	unnamed protein product [Vitis vinifera]
comp16272_c0	304	359481911	XP_002267277.2	1323	7	282	355	447	93	68	77	73.1183	207	2.66e-17	PREDICTED: uncharacterized protein LOC100252135 [Vitis vinifera]
comp16273_c0	239	116793168	ABK26636.1	261	1	162	186	239	54	48	52	88.8889	248	1.86e-24	unknown [Picea sitchensis]
comp16287_c0	286	357462941	XP_003601752.1	766	3	230	646	721	76	28	42	36.8421	124	1.76e-06	Phosphoribosylformylglycinamidine synthase [Medicago truncatula] >gi|355490800|gb|AES72003.1| Phosphoribosylformylglycinamidine synthase [Medicago truncatula]
comp16335_c0	372	125524620	EAY72734.1	1449	1	372	881	1004	124	84	101	67.7419	446	5.93e-49	hypothetical protein OsI_00599 [Oryza sativa Indica Group]
comp16349_c0	378	326501330	BAJ98896.1	152	1	129	34	81	48	25	30	52.0833	117	3.45e-06	predicted protein [Hordeum vulgare subsp. vulgare]
comp16360_c0	388	218201622	EEC84049.1	566	196	387	81	147	67	28	45	41.791	133	1.67e-07	hypothetical protein OsI_30315 [Oryza sativa Indica Group]
comp16366_c0	1334	225426708	XP_002275452.1	772	536	1276	33	289	258	138	174	53.4884	713	1.04e-82	PREDICTED: subtilisin-like protease SDD1-like [Vitis vinifera]
comp16369_c0	247	255566397	XP_002524184.1	997	178	246	776	798	23	23	23	100	122	2.01e-06	aconitase, putative [Ricinus communis] >gi|223536553|gb|EEF38199.1| aconitase, putative [Ricinus communis]
comp16378_c0	203	130582	P10978.1	1328	2	202	627	693	67	52	60	77.6119	323	2.17e-33	RecName: Full=Retrovirus-related Pol polyprotein from transposon TNT 1-94; Includes: RecName: Full=Protease; Includes: RecName: Full=Reverse transcriptase; Includes: RecName: Full=Endonuclease >gi|20045|emb|CAA32025.1| unnamed protein product [Nicotiana tabacum]
comp16409_c0	551	255539290	XP_002510710.1	467	40	213	313	370	58	44	54	75.8621	234	2.35e-23	Protein MLO, putative [Ricinus communis] >gi|223551411|gb|EEF52897.1| Protein MLO, putative [Ricinus communis]
comp16451_c0	291	398405308	XP_003854120.1	295	2	226	7	86	80	61	71	76.25	333	2.74e-36	hypothetical protein MYCGRDRAFT_92173 [Mycosphaerella graminicola IPO323] >gi|339474003|gb|EGP89096.1| hypothetical protein MYCGRDRAFT_92173 [Mycosphaerella graminicola IPO323]
comp16462_c0	444	374094674	AEY84722.1	67	4	201	2	67	66	44	59	66.6667	248	2.91e-25	ribosomal protein L22, partial [Pandalus platyceros]
comp16476_c0	340	359486618	XP_002278096.2	358	107	340	281	358	78	48	62	61.5385	266	4.06e-26	PREDICTED: protein SRG1-like [Vitis vinifera]
comp16480_c0	682	116790054	ABK25485.1	535	2	664	293	507	226	82	134	36.2832	347	3.4e-35	unknown [Picea sitchensis]
comp16516_c0	310	255556753	XP_002519410.1	186	16	252	109	186	80	33	50	41.25	181	4.92e-15	conserved hypothetical protein [Ricinus communis] >gi|223541477|gb|EEF43027.1| conserved hypothetical protein [Ricinus communis]
comp16528_c0	341	296089484	CBI39303.3	723	3	341	140	252	114	68	88	59.6491	343	8.23e-36	unnamed protein product [Vitis vinifera]
comp16605_c0	611	356520579	XP_003528939.1	195	3	380	33	154	131	50	75	38.1679	200	1.18e-16	PREDICTED: uncharacterized protein LOC100797863 [Glycine max]
comp16610_c0	285	255537201	XP_002509667.1	753	3	284	339	431	94	55	68	58.5106	275	9.62e-27	Xylem serine proteinase 1 precursor, putative [Ricinus communis] >gi|223549566|gb|EEF51054.1| Xylem serine proteinase 1 precursor, putative [Ricinus communis]
comp16615_c0	613	255538892	XP_002510511.1	151	40	480	6	151	150	75	100	50	357	9.22e-40	Auxin-induced protein 6B, putative [Ricinus communis] >gi|223551212|gb|EEF52698.1| Auxin-induced protein 6B, putative [Ricinus communis]
comp16619_c0	225	357504283	XP_003622430.1	166	48	215	66	121	56	24	32	42.8571	127	4.8e-08	hypothetical protein MTR_7g037610 [Medicago truncatula] >gi|355497445|gb|AES78648.1| hypothetical protein MTR_7g037610 [Medicago truncatula]
comp16622_c0	207	58261136	XP_567978.1	667	3	206	54	121	68	65	68	95.5882	341	1.79e-36	heat shock protein [Cryptococcus neoformans var. neoformans JEC21] >gi|134115859|ref|XP_773412.1| hypothetical protein CNBI2570 [Cryptococcus neoformans var. neoformans B-3501A] >gi|50256037|gb|EAL18765.1| hypothetical protein CNBI2570 [Cryptococcus neoformans var. neoformans B-3501A] >gi|57230060|gb|AAW46461.1| heat shock protein, putative [Cryptococcus neoformans var. neoformans JEC21]
comp16630_c0	337	170107051	XP_001884736.1	600	153	335	375	433	61	30	41	49.1803	169	3.18e-12	predicted protein [Laccaria bicolor S238N-H82] >gi|164640298|gb|EDR04564.1| predicted protein [Laccaria bicolor S238N-H82]
comp16632_c0	257	225451481	XP_002271098.1	69	73	255	9	69	61	51	56	83.6066	163	1.5e-13	PREDICTED: uncharacterized protein LOC100246292 [Vitis vinifera] >gi|296082328|emb|CBI21333.3| unnamed protein product [Vitis vinifera]
comp16659_c0	299	237862686	ACR24968.1	131	16	291	35	126	92	64	77	69.5652	340	4.34e-39	ribosomal protein S17 [Lepidochitona cinerea]
comp16673_c0	496	147784785	CAN70825.1	288	2	439	124	269	146	92	116	63.0137	517	1.45e-62	hypothetical protein VITISV_039828 [Vitis vinifera]
comp16712_c0	305	159461702	ABW96890.1	591	29	304	151	237	92	43	57	46.7391	166	5.61e-12	DRM-type DNA-methyltransferase [Elaeis guineensis]
comp16713_c0	398	302142696	CBI19899.3	1045	1	357	122	240	119	87	107	73.1092	501	1.37e-56	unnamed protein product [Vitis vinifera]
comp16727_c0	289	331229396	XP_003327364.1	204	127	288	69	122	54	41	48	75.9259	208	7.38e-19	60S ribosomal protein L40 [Puccinia graminis f. sp. tritici CRL 75-36-700-3] >gi|309306354|gb|EFP82945.1| large subunit ribosomal protein L40e [Puccinia graminis f. sp. tritici CRL 75-36-700-3]
comp16729_c0	214	395329907	EJF62292.1	308	1	204	39	106	68	56	57	82.3529	275	3.31e-28	14-3-3-domain-containing protein [Dichomitus squalens LYAD-421 SS1]
comp16732_c0	323	117166061	BAF36362.1	739	3	278	83	174	92	70	80	76.087	417	3.27e-46	hypothetical protein [Ipomoea trifida]
comp16737_c0	300	115436432	NP_001042974.1	152	1	300	21	120	100	58	74	58	240	6.05e-24	Os01g0348700 [Oryza sativa Japonica Group] >gi|315113262|pdb|3IZR|X Chain X, Localization Of The Large Subunit Ribosomal Proteins Into A 5.5 A Cryo-Em Map Of Triticum Aestivum Translating 80s Ribosome >gi|15290206|dbj|BAB63895.1| putative 60S ribosomal protein L23A [Oryza sativa Japonica Group] >gi|21104815|dbj|BAB93400.1| putative 60S ribosomal protein L23A [Oryza sativa Japonica Group] >gi|1135…
comp16751_c0	584	255549844	XP_002515973.1	303	17	343	34	141	109	45	67	41.2844	209	1.57e-17	conserved hypothetical protein [Ricinus communis] >gi|223544878|gb|EEF46393.1| conserved hypothetical protein [Ricinus communis]
comp16754_c0	425	189198155	XP_001935415.1	162	281	424	115	162	48	43	45	89.5833	218	4.64e-20	eukaryotic translation initiation factor 5A [Pyrenophora tritici-repentis Pt-1C-BFP] >gi|187981363|gb|EDU47989.1| eukaryotic translation initiation factor 5A [Pyrenophora tritici-repentis Pt-1C-BFP]
comp16781_c0	205	169862219	XP_001837740.1	436	3	203	176	243	68	47	58	69.1176	253	7.92e-25	hypothetical protein CC1G_06946 [Coprinopsis cinerea okayama7#130] >gi|116501189|gb|EAU84084.1| hypothetical protein CC1G_06946 [Coprinopsis cinerea okayama7#130]
comp16783_c0	283	226495177	NP_001146373.1	426	5	283	100	190	93	66	80	70.9677	345	2.96e-37	uncharacterized protein LOC100279951 [Zea mays] >gi|219886885|gb|ACL53817.1| unknown [Zea mays]
comp16823_c0	348	114053446	AAT40536.2	480	177	329	3	56	54	31	40	57.4074	189	5.34e-15	PttA2 protein, putative [Solanum demissum]
comp16837_c0	247	396582343	AFN88207.1	1387	38	244	1302	1367	69	42	55	60.8696	222	4.79e-21	integrase core domain containing protein [Phaseolus vulgaris]
comp16846_c0	288	398412067	XP_003857364.1	121	1	282	2	95	94	84	89	89.3617	432	4.03e-53	40S ribosomal protein S12 [Mycosphaerella graminicola IPO323] >gi|339477249|gb|EGP92340.1| hypothetical protein MYCGRDRAFT_83768 [Mycosphaerella graminicola IPO323]
comp16856_c0	531	388493406	AFK34769.1	484	5	526	42	218	179	87	120	48.6034	430	1.11e-47	unknown [Lotus japonicus]
comp16860_c0	288	389741798	EIM82986.1	84	61	246	1	62	62	41	45	66.129	185	1.46e-16	hypothetical protein STEHIDRAFT_64404 [Stereum hirsutum FP-91666 SS1]
comp16889_c0	627	255548461	XP_002515287.1	718	3	521	546	718	173	155	166	89.5954	746	1.85e-91	DNA replication licensing factor MCM7, putative [Ricinus communis] >gi|223545767|gb|EEF47271.1| DNA replication licensing factor MCM7, putative [Ricinus communis]
comp16903_c0	280	147815423	CAN76722.1	259	2	280	131	226	96	59	73	61.4583	201	9.63e-18	hypothetical protein VITISV_029641 [Vitis vinifera]
comp16921_c0	254	242063736	XP_002453157.1	1042	25	252	925	1000	76	53	65	69.7368	310	1.85e-31	hypothetical protein SORBIDRAFT_04g000920 [Sorghum bicolor] >gi|241932988|gb|EES06133.1| hypothetical protein SORBIDRAFT_04g000920 [Sorghum bicolor]
comp16931_c0	876	147799024	CAN72567.1	950	293	847	1	186	192	88	121	45.8333	397	2.59e-40	hypothetical protein VITISV_044177 [Vitis vinifera]
comp16936_c0	297	15617438	BAB64937.1	988	1	294	23	122	101	65	81	64.3564	347	3.26e-36	TdcA1-ORF1-ORF2 [Daucus carota]
comp16951_c0	1756	162464220	NP_001106065.1	768	1	1623	231	768	541	439	493	81.146	2261	0	DNA replication licensing factor MCM3 homolog 1 [Zea mays] >gi|148887401|sp|Q43704.2|MCM31_MAIZE RecName: Full=DNA replication licensing factor MCM3 homolog 1; AltName: Full=Replication origin activator 1; Short=ROA-1 >gi|114049619|emb|CAA82556.2| ROA protein [Zea mays]
comp16994_c0	321	224102205	XP_002312589.1	770	1	321	443	549	107	80	93	74.7664	388	5.74e-42	pho1-like protein [Populus trichocarpa] >gi|222852409|gb|EEE89956.1| pho1-like protein [Populus trichocarpa]
comp17036_c0	574	296089801	CBI39620.3	591	3	572	296	485	190	126	155	66.3158	716	1.61e-88	unnamed protein product [Vitis vinifera]
comp17103_c0	349	302144027	CBI23132.3	677	3	344	9	120	114	53	68	46.4912	244	2.63e-22	unnamed protein product [Vitis vinifera]
comp17120_c0	387	224124454	XP_002330027.1	502	3	386	92	219	128	71	96	55.4688	395	2.33e-43	predicted protein [Populus trichocarpa] >gi|222871452|gb|EEF08583.1| predicted protein [Populus trichocarpa]
comp17125_c0	290	359473359	XP_002269735.2	411	2	286	103	197	95	62	80	65.2632	334	1e-35	PREDICTED: vacuolar amino acid transporter 1-like [Vitis vinifera] >gi|296086363|emb|CBI31952.3| unnamed protein product [Vitis vinifera]
comp17185_c0	274	357135115	XP_003569157.1	600	3	215	83	149	71	48	55	67.6056	264	2.07e-25	PREDICTED: mini-chromosome maintenance complex-binding protein-like [Brachypodium distachyon]
comp17241_c0	369	398390864	XP_003848892.1	343	3	368	120	241	122	101	110	82.7869	530	1.13e-64	malate dehydrogenase [Mycosphaerella graminicola IPO323] >gi|339468768|gb|EGP83868.1| malate dehydrogenase [Mycosphaerella graminicola IPO323]
comp17249_c0	290	398412198	XP_003857427.1	459	3	290	72	167	96	86	90	89.5833	466	2.26e-54	beta-glucanosyltransferase [Mycosphaerella graminicola IPO323] >gi|339477312|gb|EGP92403.1| beta-glucanosyltransferase [Mycosphaerella graminicola IPO323]
comp17258_c0	507	255544041	XP_002513083.1	715	146	505	591	714	124	75	94	60.4839	343	6.62e-35	conserved hypothetical protein [Ricinus communis] >gi|223548094|gb|EEF49586.1| conserved hypothetical protein [Ricinus communis]
comp17293_c0	401	398395359	XP_003851138.1	495	3	401	239	371	133	73	102	54.8872	428	4.33e-48	hypothetical protein MYCGRDRAFT_100764 [Mycosphaerella graminicola IPO323] >gi|339471017|gb|EGP86114.1| hypothetical protein MYCGRDRAFT_100764 [Mycosphaerella graminicola IPO323]
comp17307_c0	385	390597807	EIN07206.1	228	9	299	36	132	97	68	78	70.1031	369	9.25e-42	hypothetical protein PUNSTDRAFT_53578 [Punctularia strigosozonata HHB-11173 SS5]
comp17316_c0	300	356505949	XP_003521751.1	758	76	207	634	677	44	21	26	47.7273	125	1.34e-06	PREDICTED: uncharacterized protein LOC100795835 [Glycine max]
comp17341_c0	307	359481960	XP_003632697.1	1040	3	305	500	600	101	58	79	57.4257	330	7.93e-34	PREDICTED: uncharacterized protein LOC100854636 [Vitis vinifera]
comp17356_c0	246	261532840	ACX85427.1	174	1	219	1	73	73	51	62	69.863	268	4.9e-28	flowering locus T [Carica papaya]
comp17362_c0	233	392575404	EIW68537.1	1451	3	233	303	379	77	66	72	85.7143	345	3.89e-36	hypothetical protein TREMEDRAFT_44404 [Tremella mesenterica DSM 1558]
comp17366_c0	279	62082785	AAX62221.1	115	3	278	5	96	92	70	79	76.087	389	9.91e-47	reverse transcriptase [Cycas revoluta]
comp17373_c0	385	225438807	XP_002283263.1	374	83	313	37	113	77	42	53	54.5455	227	1.43e-20	PREDICTED: germination-specific cysteine protease 1-like isoform 1 [Vitis vinifera]
comp17399_c0	516	255539447	XP_002510788.1	528	3	515	298	468	171	113	134	66.0819	647	3.46e-79	KDEL motif-containing protein 1 precursor, putative [Ricinus communis] >gi|223549903|gb|EEF51390.1| KDEL motif-containing protein 1 precursor, putative [Ricinus communis]
comp17411_c0	357	357132606	XP_003567920.1	509	203	355	307	357	51	39	41	76.4706	202	6.2e-28	PREDICTED: probable ubiquitin-conjugating enzyme E2 25-like [Brachypodium distachyon]
comp17456_c0	440	255548395	XP_002515254.1	868	86	235	393	442	50	26	35	52	146	7.42e-09	Stachyose synthase precursor, putative [Ricinus communis] >gi|223545734|gb|EEF47238.1| Stachyose synthase precursor, putative [Ricinus communis]
comp17462_c0	389	225455598	XP_002270309.1	489	1	387	141	268	129	78	99	60.4651	445	1.43e-50	PREDICTED: xyloglucan galactosyltransferase KATAMARI1 homolog [Vitis vinifera]
comp17476_c0	1078	224054414	XP_002298248.1	382	40	1059	43	382	345	161	246	46.6667	653	6.14e-79	predicted protein [Populus trichocarpa] >gi|222845506|gb|EEE83053.1| predicted protein [Populus trichocarpa]
comp17544_c0	319	353441156	AEQ94162.1	258	234	317	77	104	28	21	21	75	106	5.38e-07	nucleosome assembly protein 1 [Elaeis guineensis]
comp17547_c0	262	255551973	XP_002517031.1	771	5	262	410	495	86	50	67	58.1395	265	2.18e-25	acylamino-acid-releasing enzyme, putative [Ricinus communis] >gi|223543666|gb|EEF45194.1| acylamino-acid-releasing enzyme, putative [Ricinus communis]
comp17564_c0	583	392573945	EIW67083.1	490	3	581	214	406	193	156	173	80.829	777	1.39e-98	hypothetical protein TREMEDRAFT_40662 [Tremella mesenterica DSM 1558]
comp17568_c0	320	21397270	AAM51834.1	624	146	307	553	606	54	33	39	61.1111	177	2.39e-13	Putative plant disease resistance polyprotein [Oryza sativa Japonica Group] >gi|108706267|gb|ABF94062.1| retrotransposon protein, putative, unclassified [Oryza sativa Japonica Group]
comp17573_c0	502	224089259	XP_002308665.1	646	40	498	179	332	154	65	96	42.2078	292	4.69e-28	ein3-binding f-box protein 3 [Populus trichocarpa] >gi|222854641|gb|EEE92188.1| ein3-binding f-box protein 3 [Populus trichocarpa]
comp17608_c0	205	169845728	XP_001829583.1	190	62	202	119	165	47	28	38	59.5745	134	5.28e-09	hypothetical protein CC1G_10113 [Coprinopsis cinerea okayama7#130] >gi|116509332|gb|EAU92227.1| hypothetical protein CC1G_10113 [Coprinopsis cinerea okayama7#130]
comp17630_c0	222	108708220	ABF96015.1	409	2	217	70	141	72	57	63	79.1667	324	9.45e-35	retrotransposon protein, putative, unclassified [Oryza sativa Japonica Group]
comp17637_c0	241	332322109	CCA66008.1	678	10	240	240	312	83	34	49	40.9639	160	1.67e-11	hypothetical protein [Beta vulgaris subsp. vulgaris]
comp17674_c0	523	147790779	CAN61820.1	673	314	520	405	473	69	40	49	57.971	207	2.36e-24	hypothetical protein VITISV_015157 [Vitis vinifera]
comp17693_c0	256	345451026	AEN94093.1	143	155	256	110	143	34	23	32	67.6471	130	1.82e-08	cinnamyl alcohol dehydrogenase [Pyrus pyrifolia]
comp17695_c0	627	398411244	XP_003856964.1	415	2	550	234	415	183	127	148	69.3989	660	1.01e-81	hypothetical protein MYCGRDRAFT_67329 [Mycosphaerella graminicola IPO323] >gi|339476849|gb|EGP91940.1| hypothetical protein MYCGRDRAFT_67329 [Mycosphaerella graminicola IPO323]
comp17714_c0	314	151368249	ABS10830.1	195	1	312	64	167	104	93	99	89.4231	498	4.91e-62	glyceraldehyde-3-phosphate dehydrogenase, partial [Ramalina menziesii] >gi|151368251|gb|ABS10831.1| glyceraldehyde-3-phosphate dehydrogenase, partial [Ramalina menziesii] >gi|151368253|gb|ABS10832.1| glyceraldehyde-3-phosphate dehydrogenase, partial [Ramalina menziesii] >gi|151368255|gb|ABS10833.1| glyceraldehyde-3-phosphate dehydrogenase, partial [Ramalina menziesii]
comp17728_c0	759	255543164	XP_002512645.1	716	12	758	139	387	251	84	146	33.4661	397	2.75e-41	pentatricopeptide repeat-containing protein, putative [Ricinus communis] >gi|223548606|gb|EEF50097.1| pentatricopeptide repeat-containing protein, putative [Ricinus communis]
comp17754_c0	211	392577519	EIW70648.1	357	60	209	143	192	50	41	45	82	242	1.46e-23	hypothetical protein TREMEDRAFT_71348 [Tremella mesenterica DSM 1558]
comp17782_c0	1263	225449030	XP_002274032.1	619	27	1262	127	539	414	286	333	69.0821	1476	0	PREDICTED: BTB/POZ domain-containing protein At5g03250 [Vitis vinifera]
comp17784_c0	218	238006066	ACR34068.1	247	4	198	174	240	67	27	40	40.2985	149	7.11e-11	unknown [Zea mays]
comp17805_c0	386	242086322	XP_002443586.1	777	40	384	597	725	130	66	83	50.7692	303	5.77e-30	hypothetical protein SORBIDRAFT_08g022010 [Sorghum bicolor] >gi|241944279|gb|EES17424.1| hypothetical protein SORBIDRAFT_08g022010 [Sorghum bicolor]
comp17817_c0	247	4753889	CAB42059.1	374	2	247	181	262	82	65	75	79.2683	355	3.48e-39	Tpv2-1c [Phaseolus vulgaris]
comp17828_c0	252	388491838	AFK33985.1	86	30	167	40	85	46	26	33	56.5217	143	1.67e-10	unknown [Lotus japonicus]
comp17846_c0	377	340515354	EGR45609.1	106	130	375	2	83	82	66	70	80.4878	261	4.41e-27	hypothetical protein TRIREDRAFT_34112 [Trichoderma reesei QM6a]
comp17895_c0	378	224118380	XP_002331468.1	137	1	297	39	137	99	66	81	66.6667	376	5.11e-44	predicted protein [Populus trichocarpa] >gi|222873546|gb|EEF10677.1| predicted protein [Populus trichocarpa]
comp17923_c0	259	330917388	XP_003297795.1	1009	3	158	259	310	52	43	47	82.6923	248	4.66e-23	hypothetical protein PTT_08317 [Pyrenophora teres f. teres 0-1] >gi|311329324|gb|EFQ94101.1| hypothetical protein PTT_08317 [Pyrenophora teres f. teres 0-1]
comp17937_c0	245	115396484	XP_001213881.1	360	1	243	187	267	81	71	76	87.6543	382	3.44e-43	fructose-bisphosphate aldolase [Aspergillus terreus NIH2624] >gi|114193450|gb|EAU35150.1| fructose-bisphosphate aldolase [Aspergillus terreus NIH2624]
comp17946_c0	297	357456685	XP_003598623.1	277	2	271	123	210	90	39	64	43.3333	227	3.63e-21	Protein SENSITIVITY TO RED LIGHT REDUCED [Medicago truncatula] >gi|355487671|gb|AES68874.1| Protein SENSITIVITY TO RED LIGHT REDUCED [Medicago truncatula]
comp17989_c0	459	392578321	EIW71449.1	395	1	459	229	381	153	142	148	92.8105	751	1.34e-96	hypothetical protein TREMEDRAFT_73309 [Tremella mesenterica DSM 1558]
comp17992_c0	212	255543084	XP_002512605.1	815	2	211	472	541	70	52	60	74.2857	305	3.74e-31	conserved hypothetical protein [Ricinus communis] >gi|223548566|gb|EEF50057.1| conserved hypothetical protein [Ricinus communis]
comp17998_c0	269	392578147	EIW71275.1	473	4	267	3	90	88	80	85	90.9091	434	9.83e-50	hypothetical protein TREMEDRAFT_56379 [Tremella mesenterica DSM 1558]
comp18012_c0	228	356566140	XP_003551293.1	360	3	128	233	274	42	30	36	71.4286	140	3.62e-09	PREDICTED: LOW QUALITY PROTEIN: targeting protein for Xklp2-like [Glycine max]
comp18013_c0	245	392575426	EIW68559.1	655	8	244	485	563	79	55	64	69.6203	283	4e-28	hypothetical protein TREMEDRAFT_39506 [Tremella mesenterica DSM 1558]
comp18014_c0	245	347839259	CCD53831.1	474	12	245	225	305	81	48	62	59.2593	245	2.71e-23	similar to L-fucose:H+ symporter permease [Botryotinia fuckeliana]
comp18043_c0	206	224129338	XP_002320560.1	956	3	206	139	209	71	43	53	60.5634	215	7.47e-19	predicted protein [Populus trichocarpa] >gi|222861333|gb|EEE98875.1| predicted protein [Populus trichocarpa]
comp18059_c0	202	356561359	XP_003548950.1	1198	32	202	87	143	57	34	44	59.6491	187	3.96e-15	PREDICTED: uncharacterized protein LOC100797723 [Glycine max]
comp18073_c0	230	189196000	XP_001934338.1	977	2	229	537	612	76	76	76	100	404	2.32e-44	plasma membrane ATPase [Pyrenophora tritici-repentis Pt-1C-BFP] >gi|187980217|gb|EDU46843.1| plasma membrane ATPase [Pyrenophora tritici-repentis Pt-1C-BFP]
comp18078_c0	377	353243815	CCA75309.1	464	2	118	367	405	39	28	37	71.7949	156	1.77e-10	probable nucleosome assembly protein I [Piriformospora indica DSM 11827]
comp18080_c0	283	297816600	XP_002876183.1	140	31	279	56	139	86	41	59	47.6744	180	2.73e-15	hypothetical protein ARALYDRAFT_906689 [Arabidopsis lyrata subsp. lyrata] >gi|297322021|gb|EFH52442.1| hypothetical protein ARALYDRAFT_906689 [Arabidopsis lyrata subsp. lyrata]
comp18090_c0	218	147834348	CAN74303.1	1283	3	218	813	884	72	64	71	88.8889	354	2.11e-37	hypothetical protein VITISV_032980 [Vitis vinifera]
comp18093_c0	984	297739001	CBI28246.3	282	277	735	18	169	157	74	91	47.1338	312	1.89e-30	unnamed protein product [Vitis vinifera]
comp18105_c0	303	224075856	XP_002304798.1	1115	3	302	636	735	100	80	90	80	371	2.58e-39	multidrug resistance protein ABC transporter family [Populus trichocarpa] >gi|222842230|gb|EEE79777.1| multidrug resistance protein ABC transporter family [Populus trichocarpa]
comp18116_c0	300	169604828	XP_001795835.1	715	46	300	531	598	90	38	47	42.2222	122	3.55e-06	hypothetical protein SNOG_05430 [Phaeosphaeria nodorum SN15] >gi|111066701|gb|EAT87821.1| hypothetical protein SNOG_05430 [Phaeosphaeria nodorum SN15]
comp18120_c0	201	58268320	XP_571316.1	2237	6	200	1474	1538	65	55	61	84.6154	324	2.23e-33	acetyl-CoA carboxylase [Cryptococcus neoformans var. neoformans JEC21] >gi|57227551|gb|AAW44009.1| acetyl-CoA carboxylase, putative [Cryptococcus neoformans var. neoformans JEC21]
comp18136_c0	686	356547881	XP_003542333.1	485	3	686	212	442	237	133	181	56.1181	735	6.83e-92	PREDICTED: UDP-glycosyltransferase 85A2-like [Glycine max]
comp18141_c0	305	255552489	XP_002517288.1	155	2	289	51	146	96	27	45	28.125	122	3.78e-07	conserved hypothetical protein [Ricinus communis] >gi|223543551|gb|EEF45081.1| conserved hypothetical protein [Ricinus communis]
comp18144_c0	250	224098142	XP_002311125.1	372	9	248	90	169	80	61	70	76.25	342	2.79e-37	predicted protein [Populus trichocarpa] >gi|118486473|gb|ABK95076.1| unknown [Populus trichocarpa] >gi|222850945|gb|EEE88492.1| predicted protein [Populus trichocarpa]
comp18150_c0	353	169847506	XP_001830464.1	185	3	206	6	73	68	41	54	60.2941	135	1.35e-08	hypothetical protein CC1G_07379 [Coprinopsis cinerea okayama7#130] >gi|116508449|gb|EAU91344.1| hypothetical protein CC1G_07379 [Coprinopsis cinerea okayama7#130]
comp18153_c0	453	159517170	ABW97850.1	283	3	452	88	237	150	117	134	78	668	1.23e-85	ACS4 [Nicotiana tabacum]
comp18159_c0	371	168037350	XP_001771167.1	110	8	337	1	110	110	63	76	57.2727	210	1.64e-19	predicted protein [Physcomitrella patens subsp. patens] >gi|162677547|gb|EDQ64016.1| predicted protein [Physcomitrella patens subsp. patens]
comp18166_c0	301	356513769	XP_003525582.1	496	3	299	187	296	110	65	78	59.0909	321	1.11e-33	PREDICTED: putative glycerol-3-phosphate transporter 4-like [Glycine max]
comp18176_c0	205	62859703	NP_001016714.1	137	2	205	25	92	68	64	67	94.1176	337	4.62e-39	ribosomal protein L28 [Xenopus (Silurana) tropicalis] >gi|138519961|gb|AAI35646.1| ribosomal protein L28 [Xenopus (Silurana) tropicalis]
comp18222_c0	373	398406885	XP_003854908.1	642	2	373	232	355	124	120	121	96.7742	632	9.31e-77	hypothetical protein MYCGRDRAFT_103215, partial [Mycosphaerella graminicola IPO323] >gi|339474792|gb|EGP89884.1| hypothetical protein MYCGRDRAFT_103215 [Mycosphaerella graminicola IPO323]
comp18222_c1	227	396489711	XP_003843173.1	920	2	226	340	414	75	71	74	94.6667	372	4.82e-40	similar to heat shock protein [Leptosphaeria maculans JN3] >gi|312219751|emb|CBX99694.1| similar to heat shock protein [Leptosphaeria maculans JN3]
comp18260_c0	211	147832273	CAN68884.1	220	3	209	101	169	69	45	57	65.2174	244	2.49e-24	hypothetical protein VITISV_039230 [Vitis vinifera]
comp18262_c0	425	389747037	EIM88216.1	331	319	423	273	307	35	31	35	88.5714	157	9.23e-11	RNA-binding domain-containing protein [Stereum hirsutum FP-91666 SS1]
comp18268_c0	1427	147786981	CAN77815.1	1120	648	1427	734	977	262	166	198	63.3588	771	3.38e-147	hypothetical protein VITISV_023977 [Vitis vinifera]
comp18286_c0	588	357481637	XP_003611104.1	320	2	508	141	309	169	139	156	82.2485	628	1.97e-78	Heavy metal P-type ATPase [Medicago truncatula] >gi|355512439|gb|AES94062.1| Heavy metal P-type ATPase [Medicago truncatula]
comp18290_c0	738	115467116	NP_001057157.1	198	90	383	23	120	98	61	76	62.2449	339	4.79e-36	Os06g0218600 [Oryza sativa Japonica Group] >gi|51091368|dbj|BAD36102.1| putative blue copper protein [Oryza sativa Japonica Group] >gi|51535359|dbj|BAD37230.1| putative blue copper protein [Oryza sativa Japonica Group] >gi|113595197|dbj|BAF19071.1| Os06g0218600 [Oryza sativa Japonica Group] >gi|125596507|gb|EAZ36287.1| hypothetical protein OsJ_20609 [Oryza sativa Japonica Group] >gi|215678935|dbj…
comp18302_c0	783	255584253	XP_002532864.1	466	3	485	1	161	161	110	135	68.323	494	6.2e-56	multidrug resistance pump, putative [Ricinus communis] >gi|223527376|gb|EEF29518.1| multidrug resistance pump, putative [Ricinus communis]
comp18328_c0	243	313233745	CBY09915.1	295	86	241	40	94	55	36	40	65.4545	169	2.34e-13	unnamed protein product [Oikopleura dioica]
comp18336_c0	230	255566241	XP_002524108.1	598	2	220	105	177	73	35	55	47.9452	132	7.01e-08	conserved hypothetical protein [Ricinus communis] >gi|223536676|gb|EEF38318.1| conserved hypothetical protein [Ricinus communis]
comp18339_c0	407	201070859	CAP04931.1	139	1	405	5	139	135	113	122	83.7037	598	2.24e-77	glyceraldehyde-3-phosphate dehydrogenase [Pyrenophora tritici-repentis] >gi|201070861|emb|CAP04932.1| glyceraldehyde-3-phosphate dehydrogenase [Pyrenophora tritici-repentis] >gi|201070863|emb|CAP04933.1| glyceraldehyde-3-phosphate dehydrogenase [Pyrenophora tritici-repentis] >gi|201070865|emb|CAP04934.1| glyceraldehyde-3-phosphate dehydrogenase [Pyrenophora tritici-repentis] >gi|201070867|emb|CAP…
comp18343_c0	243	358022840	AEU03873.1	292	3	242	206	285	80	70	75	87.5	312	1.66e-33	glyceraldehyde 3-phosphate dehydrogenase, partial [Amphobotrys ricini] >gi|358022842|gb|AEU03874.1| glyceraldehyde 3-phosphate dehydrogenase, partial [Amphobotrys ricini]
comp18358_c0	228	398398854	XP_003852884.1	559	3	227	128	202	75	49	60	65.3333	271	7.79e-27	putative ferulic acid Esterase/Feruloyl esterase precursor [Mycosphaerella graminicola IPO323] >gi|339472766|gb|EGP87860.1| putative ferulic acid Esterase/Feruloyl esterase precursor [Mycosphaerella graminicola IPO323]
comp18366_c0	267	225454340	XP_002275824.1	465	2	259	145	233	89	40	49	44.9438	186	4.54e-15	PREDICTED: putative UDP-rhamnose:rhamnosyltransferase 1 [Vitis vinifera]
comp18395_c0	372	392577594	EIW70723.1	261	2	370	58	180	123	107	113	86.9919	579	6.22e-73	hypothetical protein TREMEDRAFT_68186 [Tremella mesenterica DSM 1558]
comp18445_c0	488	147778267	CAN60813.1	566	104	301	459	524	66	35	43	53.0303	166	2.1e-14	hypothetical protein VITISV_038722 [Vitis vinifera]
comp18446_c0	208	18379279	NP_565275.1	743	90	206	437	475	39	25	31	64.1026	128	2.64e-07	uncharacterized protein [Arabidopsis thaliana] >gi|20197546|gb|AAD12702.2| expressed protein [Arabidopsis thaliana] >gi|330250391|gb|AEC05485.1| uncharacterized protein [Arabidopsis thaliana]
comp18469_c0	253	398391196	XP_003849058.1	734	1	252	454	541	88	77	83	87.5	340	8.99e-36	hypothetical protein MYCGRDRAFT_63336 [Mycosphaerella graminicola IPO323] >gi|339468934|gb|EGP84034.1| hypothetical protein MYCGRDRAFT_63336 [Mycosphaerella graminicola IPO323]
comp18472_c0	606	357164654	XP_003580124.1	510	2	505	329	493	168	107	134	63.6905	578	1.1e-68	PREDICTED: beta-glucosidase 16-like isoform 1 [Brachypodium distachyon]
comp18498_c0	217	168003485	XP_001754443.1	126	8	217	3	72	70	45	61	64.2857	262	8.01e-28	predicted protein [Physcomitrella patens subsp. patens] >gi|162694545|gb|EDQ80893.1| predicted protein [Physcomitrella patens subsp. patens]
comp18509_c0	207	393240486	EJD48012.1	274	1	207	101	169	69	53	62	76.8116	276	1.16e-28	hypothetical protein AURDEDRAFT_113265 [Auricularia delicata TFB-10046 SS5]
comp18516_c0	336	356569249	XP_003552816.1	363	38	334	74	172	99	73	85	73.7374	406	3.47e-46	PREDICTED: trehalose-phosphate phosphatase-like [Glycine max]
comp18519_c0	516	102139809	ABF69994.1	103	70	369	1	100	100	74	91	74	349	1.21e-39	glutaredoxin family protein [Musa acuminata]
comp18528_c0	401	255552113	XP_002517101.1	882	231	401	1	57	57	37	45	64.9123	195	2.84e-15	ATP-dependent helicase NAM7, putative [Ricinus communis] >gi|223543736|gb|EEF45264.1| ATP-dependent helicase NAM7, putative [Ricinus communis]
comp18539_c0	255	242066230	XP_002454404.1	840	108	254	686	734	49	28	35	57.1429	151	3.92e-10	hypothetical protein SORBIDRAFT_04g030220 [Sorghum bicolor] >gi|241934235|gb|EES07380.1| hypothetical protein SORBIDRAFT_04g030220 [Sorghum bicolor]
comp18549_c0	349	357498261	XP_003619419.1	1105	15	347	153	262	114	48	75	42.1053	226	1.13e-19	NBS-LRR resistance protein [Medicago truncatula] >gi|355494434|gb|AES75637.1| NBS-LRR resistance protein [Medicago truncatula]
comp18583_c0	208	398410598	XP_003856647.1	728	3	206	19	86	68	46	55	67.6471	273	7.91e-27	acetate--CoA ligase [Mycosphaerella graminicola IPO323] >gi|339476532|gb|EGP91623.1| acetyl-coenzyme A synthetase [Mycosphaerella graminicola IPO323]
comp18597_c0	362	297736661	CBI25678.3	386	10	342	131	245	115	36	58	31.3043	133	1.18e-07	unnamed protein product [Vitis vinifera]
comp18599_c0	223	147815986	CAN74869.1	328	2	142	212	258	47	34	41	72.3404	186	9.44e-16	hypothetical protein VITISV_004322 [Vitis vinifera]
comp18625_c0	244	21397270	AAM51834.1	624	1	243	525	605	81	54	64	66.6667	312	3.08e-32	Putative plant disease resistance polyprotein [Oryza sativa Japonica Group] >gi|108706267|gb|ABF94062.1| retrotransposon protein, putative, unclassified [Oryza sativa Japonica Group]
comp18626_c0	227	357517669	XP_003629123.1	136	3	137	20	61	45	28	34	62.2222	129	2.11e-08	Glutamate receptor 3.6 [Medicago truncatula] >gi|355523145|gb|AET03599.1| Glutamate receptor 3.6 [Medicago truncatula]
comp18649_c0	215	38567922	CAE75905.1	624	48	212	537	591	55	34	42	61.8182	175	1.17e-13	OSJNBa0088I22.18 [Oryza sativa Japonica Group]
comp18657_c0	215	321265277	XP_003197355.1	527	22	213	461	525	65	35	50	53.8462	194	2.89e-16	hypothetical protein CGB_M3140W [Cryptococcus gattii WM276] >gi|317463834|gb|ADV25568.1| Conserved hypothetical protein [Cryptococcus gattii WM276]
comp18657_c1	267	58261750	XP_568285.1	527	1	204	396	463	68	55	61	80.8824	297	2.33e-30	hypothetical protein CNM02030 [Cryptococcus neoformans var. neoformans JEC21] >gi|134118517|ref|XP_772032.1| hypothetical protein CNBM1900 [Cryptococcus neoformans var. neoformans B-3501A] >gi|50254638|gb|EAL17385.1| hypothetical protein CNBM1900 [Cryptococcus neoformans var. neoformans B-3501A] >gi|57230458|gb|AAW46768.1| conserved hypothetical protein [Cryptococcus neoformans var. neoformans JE…
comp18693_c0	1210	242062718	XP_002452648.1	580	5	1189	182	570	395	296	342	74.9367	1438	0	hypothetical protein SORBIDRAFT_04g029890 [Sorghum bicolor] >gi|241932479|gb|EES05624.1| hypothetical protein SORBIDRAFT_04g029890 [Sorghum bicolor]
comp18697_c0	250	7638022	AAF65309.1	542	1	249	304	386	83	51	63	61.4458	296	2.59e-30	reverse transcriptase [Picea glauca]
comp18704_c0	374	224077674	XP_002305356.1	153	144	275	86	129	44	28	36	63.6364	148	1.98e-10	predicted protein [Populus trichocarpa] >gi|222848320|gb|EEE85867.1| predicted protein [Populus trichocarpa]
comp18705_c0	418	212723412	NP_001131227.1	323	10	279	154	244	91	51	68	56.044	255	2.9e-24	uncharacterized protein LOC100192536 [Zea mays] >gi|194690930|gb|ACF79549.1| unknown [Zea mays] >gi|194700718|gb|ACF84443.1| unknown [Zea mays] >gi|195639064|gb|ACG39000.1| syntaxin 43 [Zea mays]
comp18711_c0	250	297736631	CBI25502.3	978	69	224	31	82	52	28	36	53.8462	146	1.53e-09	unnamed protein product [Vitis vinifera]
comp18721_c0	240	91214187	YP_538810.1	1792	3	239	840	918	79	79	79	100	373	8.33e-40	hypothetical chloroplast RF1 [Glycine max] >gi|118577983|sp|Q2PMP0.1|YCF1_SOYBN RecName: Full=Putative membrane protein ycf1; Short=RF1 >gi|83595788|gb|ABC25169.1| hypothetical chloroplast RF1 [Glycine max]
comp18745_c0	349	392573809	EIW66947.1	507	1	348	191	306	116	94	108	81.0345	518	2.61e-61	hypothetical protein TREMEDRAFT_34131 [Tremella mesenterica DSM 1558]
comp18750_c0	496	321248839	XP_003191259.1	581	112	495	435	563	129	114	121	88.3721	593	7.61e-71	heat shock protein [Cryptococcus gattii WM276] >gi|317457726|gb|ADV19472.1| heat shock protein, putative [Cryptococcus gattii WM276]
comp18752_c0	208	295828708	ADG38023.1	149	21	206	49	110	62	38	50	61.2903	213	2.11e-20	AT1G65730-like protein [Capsella grandiflora] >gi|295828712|gb|ADG38025.1| AT1G65730-like protein [Capsella grandiflora] >gi|295828714|gb|ADG38026.1| AT1G65730-like protein [Capsella grandiflora] >gi|295828716|gb|ADG38027.1| AT1G65730-like protein [Capsella grandiflora]
comp18754_c0	1646	147820318	CAN78089.1	1066	138	752	314	499	213	61	94	28.6385	199	6.82e-47	hypothetical protein VITISV_042921 [Vitis vinifera]
comp18781_c0	229	227204125	BAH56914.1	159	37	228	74	137	64	53	61	82.8125	299	5.38e-33	AT3G08580 [Arabidopsis thaliana]
comp18808_c0	318	218187169	EEC69596.1	2785	1	306	1518	1619	102	60	78	58.8235	332	1.05e-33	hypothetical protein OsI_38942 [Oryza sativa Indica Group]
comp18824_c0	478	224058673	XP_002299596.1	380	131	451	238	379	142	63	78	44.3662	245	1.45e-22	predicted protein [Populus trichocarpa] >gi|222846854|gb|EEE84401.1| predicted protein [Populus trichocarpa]
comp18839_c0	352	255559216	XP_002520629.1	363	5	352	46	163	118	79	92	66.9492	409	1.67e-46	Protein kinase APK1A, chloroplast precursor, putative [Ricinus communis] >gi|223540190|gb|EEF41765.1| Protein kinase APK1A, chloroplast precursor, putative [Ricinus communis]
comp18845_c0	332	255538220	XP_002510175.1	649	6	329	91	222	132	55	81	41.6667	188	7.58e-15	ATP binding protein, putative [Ricinus communis] >gi|223550876|gb|EEF52362.1| ATP binding protein, putative [Ricinus communis]
comp18891_c0	219	189190440	XP_001931559.1	533	3	218	258	329	72	57	64	79.1667	305	9.66e-32	high affinity glucose transporter RGT2 [Pyrenophora tritici-repentis Pt-1C-BFP] >gi|187973165|gb|EDU40664.1| high affinity glucose transporter RGT2 [Pyrenophora tritici-repentis Pt-1C-BFP]
comp18898_c0	254	331271992	AED02590.1	706	6	254	70	149	83	44	59	53.012	197	2.67e-16	ferric reductase [Lotus japonicus]
comp18901_c0	256	341038955	EGS23947.1	590	1	255	498	582	85	77	80	90.5882	409	9.29e-46	mitochondrial aldehyde dehydrogenase-like protein [Chaetomium thermophilum var. thermophilum DSM 1495]
comp18903_c0	216	392572876	EIW66019.1	1088	39	215	435	493	59	52	53	88.1356	201	6.19e-17	hypothetical protein TREMEDRAFT_41072 [Tremella mesenterica DSM 1558]
comp18913_c0	293	147804701	CAN64698.1	1137	5	292	139	234	96	59	77	61.4583	316	6.39e-32	hypothetical protein VITISV_000807 [Vitis vinifera]
comp18927_c0	374	283132359	BAI63585.1	578	53	373	467	577	111	83	97	74.7748	458	5.66e-52	ACT-domain-containing protein kinase [Lotus japonicus]
comp18948_c0	306	225426560	XP_002272456.1	320	3	305	186	286	102	56	77	54.902	189	8.74e-16	PREDICTED: uncharacterized protein At5g39865 [Vitis vinifera]
comp18950_c0	256	392574958	EIW68093.1	674	3	254	214	297	84	74	75	88.0952	390	5.42e-43	hypothetical protein TREMEDRAFT_45054 [Tremella mesenterica DSM 1558]
comp18972_c0	210	392576682	EIW69812.1	414	7	210	106	173	68	30	43	44.1176	154	4.7e-11	hypothetical protein TREMEDRAFT_61581 [Tremella mesenterica DSM 1558]
comp18978_c0	248	297733786	CBI15033.3	3085	102	239	2349	2394	46	26	35	56.5217	130	2.41e-07	unnamed protein product [Vitis vinifera]
comp18985_c0	409	224146520	XP_002326036.1	357	52	399	11	125	116	57	76	49.1379	283	3.66e-28	flavonoid o-methyltransferase related [Populus trichocarpa] >gi|222862911|gb|EEF00418.1| flavonoid o-methyltransferase related [Populus trichocarpa]
comp18990_c0	308	356591750	AET21306.1	198	71	217	47	95	49	28	36	57.1429	143	7.3e-10	chloroplast soluble peridinin-chlorophyll a-binding protein precursor [Symbiodinium muscatinei]
comp18993_c0	428	396463529	XP_003836375.1	98	153	398	17	98	82	41	56	50	192	9.83e-17	similar to chaperone/heat shock protein Hsp12 [Leptosphaeria maculans JN3] >gi|312212928|emb|CBX93010.1| similar to chaperone/heat shock protein Hsp12 [Leptosphaeria maculans JN3]
comp18994_c0	356	321260514	XP_003194977.1	567	2	166	417	469	56	37	43	66.0714	163	1.94e-11	pre-rRNA processing protein; Nop58p [Cryptococcus gattii WM276] >gi|317461449|gb|ADV23190.1| pre-rRNA processing protein, putative; Nop58p [Cryptococcus gattii WM276]
comp19009_c0	348	255569514	XP_002525724.1	625	260	346	596	624	29	26	26	89.6552	149	1.19e-09	hydrolase, hydrolyzing O-glycosyl compounds, putative [Ricinus communis] >gi|223535024|gb|EEF36707.1| hydrolase, hydrolyzing O-glycosyl compounds, putative [Ricinus communis]
comp19016_c0	633	398406008	XP_003854470.1	265	1	462	30	183	154	141	148	91.5584	696	4.96e-89	60S ribosomal protein L8 [Mycosphaerella graminicola IPO323] >gi|339474353|gb|EGP89446.1| hypothetical protein MYCGRDRAFT_103683 [Mycosphaerella graminicola IPO323]
comp19020_c1	209	336471577	EGO59738.1	902	4	120	864	902	39	30	36	76.9231	188	3.11e-15	hypothetical protein NEUTE1DRAFT_80098 [Neurospora tetrasperma FGSC 2508] >gi|350292686|gb|EGZ73881.1| DUF221-domain-containing protein [Neurospora tetrasperma FGSC 2509]
comp19033_c0	270	38567889	CAE03644.2	1045	9	269	542	628	87	52	63	59.7701	282	1.66e-27	OSJNBa0060N03.9 [Oryza sativa Japonica Group]
comp19033_c1	341	57834114	CAE05707.2	1015	15	230	148	218	72	41	52	56.9444	177	3.75e-22	OSJNBb0065J09.3 [Oryza sativa Japonica Group]
comp19049_c0	609	58262042	XP_568431.1	349	9	350	69	181	115	74	82	64.3478	270	1.83e-25	hypothetical protein CNM01180 [Cryptococcus neoformans var. neoformans JEC21] >gi|134118343|ref|XP_772185.1| hypothetical protein CNBM1040 [Cryptococcus neoformans var. neoformans B-3501A] >gi|50254793|gb|EAL17538.1| hypothetical protein CNBM1040 [Cryptococcus neoformans var. neoformans B-3501A] >gi|57230604|gb|AAW46914.1| conserved hypothetical protein [Cryptococcus neoformans var. neoformans JE…
comp19060_c0	262	345561223	EGX44319.1	180	1	225	75	149	75	62	67	82.6667	335	6.39e-38	hypothetical protein AOL_s00193g47 [Arthrobotrys oligospora ATCC 24927]
comp19062_c0	314	147822139	CAN77045.1	665	2	313	268	371	104	71	79	68.2692	372	3.79e-40	hypothetical protein VITISV_035256 [Vitis vinifera]
comp19077_c0	264	148909481	ABR17838.1	795	55	264	392	460	73	30	46	41.0959	136	4.45e-08	unknown [Picea sitchensis]
comp19105_c0	369	296083346	CBI22982.3	1361	1	369	978	1100	123	62	87	50.4065	315	2.48e-31	unnamed protein product [Vitis vinifera]
comp19144_c0	1137	12323627	AAG51783.1	1142	279	914	866	1089	234	60	95	25.641	123	4.97e-07	reverse transcriptase, putative; 16838-20266 [Arabidopsis thaliana]
comp19157_c0	523	242056899	XP_002457595.1	1345	4	522	820	991	173	129	152	74.5665	645	4.13e-75	hypothetical protein SORBIDRAFT_03g009950 [Sorghum bicolor] >gi|241929570|gb|EES02715.1| hypothetical protein SORBIDRAFT_03g009950 [Sorghum bicolor]
comp19173_c0	368	297723389	NP_001174058.1	782	1	213	456	526	71	38	51	53.5211	203	1.33e-16	Os04g0578900 [Oryza sativa Japonica Group] >gi|32488509|emb|CAE03261.1| OSJNBa0011J08.16 [Oryza sativa Japonica Group] >gi|255675714|dbj|BAH92786.1| Os04g0578900 [Oryza sativa Japonica Group]
comp19204_c0	436	321250556	XP_003191848.1	191	1	426	1	142	142	124	137	87.3239	687	6.5e-90	60S ribosomal protein l9 [Cryptococcus gattii WM276] >gi|317458316|gb|ADV20061.1| 60S ribosomal protein l9, putative [Cryptococcus gattii WM276]
comp19209_c0	243	255565570	XP_002523775.1	550	44	220	324	382	59	40	48	67.7966	222	6.33e-20	cytochrome P450, putative [Ricinus communis] >gi|223536987|gb|EEF38624.1| cytochrome P450, putative [Ricinus communis]
comp19211_c0	453	359474081	XP_002270919.2	342	2	322	2	109	108	71	87	65.7407	387	6.28e-43	PREDICTED: dihydroflavonol-4-reductase-like [Vitis vinifera]
comp19235_c0	233	189197469	XP_001935072.1	687	1	231	289	368	81	48	59	59.2593	251	1.01e-23	conserved hypothetical protein [Pyrenophora tritici-repentis Pt-1C-BFP] >gi|187981020|gb|EDU47646.1| conserved hypothetical protein [Pyrenophora tritici-repentis Pt-1C-BFP]
comp19238_c0	237	321263709	XP_003196572.1	640	22	180	204	269	66	41	47	62.1212	200	7.85e-17	hypothetical protein CGB_K0390C [Cryptococcus gattii WM276] >gi|317463049|gb|ADV24785.1| Hypothetical protein CGB_K0390C [Cryptococcus gattii WM276]
comp19241_c0	336	321254772	XP_003193192.1	477	52	306	16	98	85	63	69	74.1176	312	3.69e-32	hypothetical protein CGB_C9300C [Cryptococcus gattii WM276] >gi|317459661|gb|ADV21405.1| hypothetical protein CNC00420 [Cryptococcus gattii WM276]
comp19245_c0	488	392575206	EIW68340.1	430	1	486	20	181	162	153	158	94.4444	803	7e-104	hypothetical protein TREMEDRAFT_39845 [Tremella mesenterica DSM 1558]
comp19260_c0	313	147805713	CAN67271.1	434	9	290	51	145	95	58	67	61.0526	282	2.83e-28	hypothetical protein VITISV_002238 [Vitis vinifera]
comp19285_c0	216	255317085	ACU01862.1	432	4	216	120	190	71	39	51	54.9296	228	3.13e-21	unknown protein [Glycine max]
comp19310_c0	257	356507238	XP_003522376.1	3439	141	257	2806	2860	55	28	34	50.9091	113	9.23e-10	PREDICTED: serine/threonine-protein kinase ATM-like [Glycine max]
comp19316_c0	408	2826900	BAA24573.1	1243	13	408	1087	1219	133	88	111	66.1654	514	5.08e-58	DNA polymerase alpha catalytic subunit [Oryza sativa]
comp19334_c0	341	13872955	BAB44060.1	252	70	219	177	226	50	32	42	64	177	2.99e-14	hypothetical protein [Oryza sativa Japonica Group] >gi|125569074|gb|EAZ10589.1| hypothetical protein OsJ_00421 [Oryza sativa Japonica Group]
comp19340_c0	746	297720653	NP_001172688.1	425	1	735	1	247	248	138	181	55.6452	681	4.19e-84	Os01g0890900 [Oryza sativa Japonica Group] >gi|255673945|dbj|BAH91418.1| Os01g0890900 [Oryza sativa Japonica Group]
comp19342_c0	676	356544708	XP_003540789.1	2207	2	676	743	967	225	211	218	93.7778	1150	2.9e-142	PREDICTED: DNA polymerase epsilon catalytic subunit A-like [Glycine max]
comp19351_c0	812	224146092	XP_002325877.1	164	555	800	29	110	82	35	53	42.6829	191	3.08e-15	predicted protein [Populus trichocarpa] >gi|222862752|gb|EEF00259.1| predicted protein [Populus trichocarpa]
comp19369_c0	249	194695444	ACF81806.1	289	1	231	194	270	77	42	55	54.5455	204	2.69e-18	unknown [Zea mays]
comp19371_c0	357	398397831	XP_003852373.1	426	1	357	121	239	119	110	114	92.437	595	2.21e-73	hypothetical protein MYCGRDRAFT_42499 [Mycosphaerella graminicola IPO323] >gi|339472254|gb|EGP87349.1| hypothetical protein MYCGRDRAFT_42499 [Mycosphaerella graminicola IPO323]
comp19380_c0	528	242037707	XP_002466248.1	216	37	423	3	127	131	71	89	54.1985	352	1.36e-38	hypothetical protein SORBIDRAFT_01g004320 [Sorghum bicolor] >gi|241920102|gb|EER93246.1| hypothetical protein SORBIDRAFT_01g004320 [Sorghum bicolor]
comp19393_c0	236	38344352	CAD40174.2	1342	30	236	106	174	69	25	41	36.2319	137	2.16e-08	OSJNBa0061A09.13 [Oryza sativa Japonica Group]
comp19400_c0	292	392578648	EIW71776.1	638	3	161	586	638	53	47	48	88.6792	264	2.6e-25	hypothetical protein TREMEDRAFT_38067 [Tremella mesenterica DSM 1558]
comp19411_c0	214	51477393	AAU04766.1	563	2	214	164	236	73	35	52	47.9452	174	1.54e-13	protein disulfide isomerase (PDI)-like protein 2 [Cucumis melo]
comp19427_c0	590	9802583	AAF99785.1	740	12	557	101	283	189	91	127	48.1481	439	8.76e-48	T2E6.4 [Arabidopsis thaliana]
comp19440_c0	424	225437481	XP_002274010.1	1171	3	422	131	276	150	81	102	54	375	3.35e-39	PREDICTED: cellulose synthase-like protein D5-like [Vitis vinifera]
comp19459_c0	231	389742599	EIM83785.1	245	1	216	5	77	73	41	55	56.1644	203	2.94e-18	hypothetical protein STEHIDRAFT_100777 [Stereum hirsutum FP-91666 SS1]
comp19478_c0	397	335345716	AEH41439.1	268	2	397	2	133	132	119	127	90.1515	640	6.91e-82	plasma membrane H+-ATPase [Melastoma malabathricum]
comp19491_c0	501	359493899	XP_003634689.1	667	1	462	61	219	159	107	125	67.2956	563	8.54e-66	PREDICTED: cyclic nucleotide-gated ion channel 4-like [Vitis vinifera]
comp19492_c0	280	367053267	XP_003657012.1	189	1	279	28	120	93	55	73	59.1398	312	3.05e-34	hypothetical protein THITE_2122346 [Thielavia terrestris NRRL 8126] >gi|347004277|gb|AEO70676.1| hypothetical protein THITE_2122346 [Thielavia terrestris NRRL 8126]
comp19502_c0	446	357132832	XP_003568032.1	376	1	201	246	313	68	40	54	58.8235	182	5.61e-14	PREDICTED: uncharacterized protein LOC100837480 [Brachypodium distachyon]
comp19524_c0	422	359486549	XP_002275579.2	653	120	419	30	126	101	43	68	42.5743	196	1.61e-15	PREDICTED: uncharacterized protein LOC100246256 [Vitis vinifera]
comp19550_c0	306	348535170	XP_003455074.1	123	9	305	1	99	99	98	98	98.9899	364	8.72e-43	PREDICTED: 60S ribosomal protein L35-like [Oreochromis niloticus]
comp19554_c0	632	224129806	XP_002328807.1	271	49	627	74	262	200	136	151	68	578	3.26e-71	predicted protein [Populus trichocarpa] >gi|222839105|gb|EEE77456.1| predicted protein [Populus trichocarpa]
comp19560_c0	314	388856193	CCF50184.1	545	2	313	4	116	115	66	78	57.3913	187	7.42e-15	probable monosaccharide transporter [Ustilago hordei]
comp19585_c0	230	124359291	ABD28426.2	517	2	229	186	261	76	65	72	85.5263	350	5.1e-38	RNA-directed DNA polymerase (Reverse transcriptase) [Medicago truncatula]
comp19588_c0	332	222636729	EEE66861.1	728	6	332	257	360	109	58	79	53.211	300	7.72e-30	hypothetical protein OsJ_23658 [Oryza sativa Japonica Group]
comp19590_c0	319	255579389	XP_002530539.1	261	8	262	87	181	95	63	72	66.3158	314	1.04e-33	NAC domain-containing protein, putative [Ricinus communis] >gi|223529943|gb|EEF31871.1| NAC domain-containing protein, putative [Ricinus communis]
comp19591_c0	338	192910872	ACF06544.1	162	2	337	16	126	112	78	87	69.6429	397	4.72e-47	pathogenesis-related protein [Elaeis guineensis]
comp19606_c0	357	150375647	YP_001315043.1	378	2	355	204	321	118	114	116	96.6102	409	2.11e-46	cytochrome b [Litopenaeus vannamei] >gi|98283632|gb|ABF58016.1| cytochrome b [Litopenaeus vannamei] >gi|148532191|gb|ABQ84188.1| cytochrome b [Litopenaeus vannamei]
comp19691_c0	211	115444985	NP_001046272.1	1131	2	202	184	250	67	36	45	53.7313	172	4.7e-13	Os02g0211200 [Oryza sativa Japonica Group] >gi|113535803|dbj|BAF08186.1| Os02g0211200 [Oryza sativa Japonica Group] >gi|125581268|gb|EAZ22199.1| hypothetical protein OsJ_05862 [Oryza sativa Japonica Group]
comp19702_c0	291	147775003	CAN61703.1	643	118	267	549	597	50	23	42	46	137	2.34e-17	hypothetical protein VITISV_026977 [Vitis vinifera]
comp19705_c0	1077	357139785	XP_003571458.1	382	594	734	336	382	47	32	40	68.0851	179	5.3e-12	PREDICTED: meiotic recombination protein SPO11-2-like [Brachypodium distachyon]
comp19714_c0	479	392575818	EIW68950.1	532	215	478	444	530	88	73	78	82.9545	365	1.19e-38	hypothetical protein TREMEDRAFT_39274 [Tremella mesenterica DSM 1558]
comp19744_c0	248	398407599	XP_003855265.1	325	2	247	9	90	82	59	69	71.9512	321	1.65e-34	hypothetical protein MYCGRDRAFT_103492 [Mycosphaerella graminicola IPO323] >gi|339475149|gb|EGP90241.1| hypothetical protein MYCGRDRAFT_103492 [Mycosphaerella graminicola IPO323]
comp19749_c0	277	392572596	EIW65741.1	165	1	264	1	88	88	86	87	97.7273	363	3.02e-42	hypothetical protein TREMEDRAFT_41218 [Tremella mesenterica DSM 1558]
comp19759_c0	936	242041185	XP_002467987.1	254	208	891	5	238	234	141	175	60.2564	753	2.5e-96	hypothetical protein SORBIDRAFT_01g037650 [Sorghum bicolor] >gi|241921841|gb|EER94985.1| hypothetical protein SORBIDRAFT_01g037650 [Sorghum bicolor]
comp19775_c0	404	343160541	CAX16990.1	361	114	404	1	97	97	89	94	91.7526	464	2.28e-54	MADS1 protein [Eschscholzia californica] >gi|343160543|emb|CAX16991.1| MADS1 protein [Eschscholzia californica]
comp19811_c0	309	147811713	CAN65966.1	1154	21	308	385	480	96	62	73	64.5833	343	1.75e-35	hypothetical protein VITISV_005935 [Vitis vinifera]
comp19814_c0	241	398390850	XP_003848885.1	494	2	241	258	337	80	70	75	87.5	300	3.94e-31	dihydrolipoamide acetyltransferase [Mycosphaerella graminicola IPO323] >gi|339468761|gb|EGP83861.1| dihydrolipoamide acetyltransferase [Mycosphaerella graminicola IPO323]
comp19821_c0	250	32488421	CAE02764.1	333	3	215	73	143	71	45	57	63.3803	234	2.65e-22	OSJNBb0085F13.11 [Oryza sativa Japonica Group] >gi|125589096|gb|EAZ29446.1| hypothetical protein OsJ_13521 [Oryza sativa Japonica Group]
comp19845_c0	276	224120070	XP_002331129.1	365	124	276	72	122	51	42	47	82.3529	259	1.78e-25	predicted protein [Populus trichocarpa] >gi|222872857|gb|EEF09988.1| predicted protein [Populus trichocarpa]
comp19873_c0	274	347828691	CCD44388.1	217	1	273	111	201	91	66	76	72.5275	290	9.22e-31	hypothetical protein [Botryotinia fuckeliana]
comp19877_c0	1216	115471325	NP_001059261.1	720	2	610	365	567	203	115	147	56.6502	618	3.66e-111	Os07g0239600 [Oryza sativa Japonica Group] >gi|33146689|dbj|BAC80084.1| putative pentatricopeptide (PPR) repeat-containing protein [Oryza sativa Japonica Group] >gi|50510012|dbj|BAD30625.1| putative pentatricopeptide (PPR) repeat-containing protein [Oryza sativa Japonica Group] >gi|113610797|dbj|BAF21175.1| Os07g0239600 [Oryza sativa Japonica Group]
comp19897_c0	934	357123306	XP_003563352.1	302	126	854	59	301	243	181	211	74.4856	930	2.79e-122	PREDICTED: rRNA 2'-O-methyltransferase fibrillarin 1-like [Brachypodium distachyon]
comp19926_c0	550	224078329	XP_002305522.1	255	9	377	110	251	142	45	72	31.6901	176	2.59e-13	predicted protein [Populus trichocarpa] >gi|222848486|gb|EEE86033.1| predicted protein [Populus trichocarpa]
comp19930_c0	261	170090191	XP_001876318.1	462	14	259	350	431	82	45	58	54.878	230	4.09e-21	predicted protein [Laccaria bicolor S238N-H82] >gi|164649578|gb|EDR13820.1| predicted protein [Laccaria bicolor S238N-H82]
comp19946_c0	283	47824985	AAT38758.1	1333	3	278	405	496	92	42	58	45.6522	183	3.59e-14	Putative gag-pol polyprotein, identical [Solanum demissum]
comp19949_c0	222	357143796	XP_003573054.1	965	2	220	380	452	73	63	68	86.3014	347	1.3e-36	PREDICTED: DNA repair and recombination protein RAD54-like [Brachypodium distachyon]
comp19966_c0	259	378726874	EHY53333.1	632	20	256	14	92	79	52	61	65.8228	303	6.81e-31	beta-fructofuranosidase [Exophiala dermatitidis NIH/UT8656]
comp19975_c0	282	255582138	XP_002531863.1	500	1	282	103	200	98	40	61	40.8163	176	1.58e-13	ATP binding protein, putative [Ricinus communis] >gi|223528471|gb|EEF30500.1| ATP binding protein, putative [Ricinus communis]
comp20010_c0	212	392578225	EIW71353.1	468	5	211	315	383	69	67	68	97.1014	356	5.12e-39	UDP-glucose dehydrogenase [Tremella mesenterica DSM 1558]
comp20036_c0	229	359492641	XP_003634448.1	555	2	229	323	394	76	39	50	51.3158	179	4.23e-14	PREDICTED: LOW QUALITY PROTEIN: cytochrome P450 82A3-like [Vitis vinifera]
comp20043_c0	239	58269728	XP_572020.1	464	3	239	75	153	79	77	79	97.4684	421	3.41e-48	translation elongation factor [Cryptococcus neoformans var. neoformans JEC21] >gi|134113865|ref|XP_774180.1| hypothetical protein CNBG1620 [Cryptococcus neoformans var. neoformans B-3501A] >gi|50256815|gb|EAL19533.1| hypothetical protein CNBG1620 [Cryptococcus neoformans var. neoformans B-3501A] >gi|57228256|gb|AAW44713.1| translation elongation factor, putative [Cryptococcus neoformans var. neof…
comp20063_c0	624	356519411	XP_003528366.1	314	21	623	120	314	201	85	127	42.2886	427	3.25e-48	PREDICTED: gibberellin 20 oxidase 1-like [Glycine max]
comp20072_c0	396	321259868	XP_003194654.1	159	1	396	11	142	132	121	126	91.6667	596	9.57e-77	40s ribosomal protein s15 [Cryptococcus gattii WM276] >gi|317461126|gb|ADV22867.1| 40s ribosomal protein s15, putative [Cryptococcus gattii WM276]
comp20079_c0	340	224365624	YP_002608352.1	975	7	339	262	374	118	65	80	55.0847	324	7.47e-33	DNA-dependent RNA polymerase [Vitis vinifera] >gi|209954148|emb|CAQ77581.1| DNA-dependent RNA polymerase. This is a family of single chain RNA polymerases; pfam00940 [Vitis vinifera] >gi|239764752|gb|ACS15222.1| DNA-dependent RNA polymerase [Vitis vinifera]
comp20080_c0	453	115474535	NP_001060864.1	825	2	448	435	589	155	69	113	44.5161	380	4.1e-40	Os08g0117800 [Oryza sativa Japonica Group] >gi|42407894|dbj|BAD09034.1| putative cation/hydrogen exchanger (CHX6b) [Oryza sativa Japonica Group] >gi|50725637|dbj|BAD33104.1| putative cation/hydrogen exchanger (CHX6b) [Oryza sativa Japonica Group] >gi|113622833|dbj|BAF22778.1| Os08g0117800 [Oryza sativa Japonica Group] >gi|125559957|gb|EAZ05405.1| hypothetical protein OsI_27614 [Oryza sativa Indic…
comp20112_c0	400	225447256	XP_002272957.1	517	78	374	66	164	99	44	65	44.4444	184	4.61e-14	PREDICTED: uncharacterized protein LOC100246486 [Vitis vinifera]
comp20117_c0	420	302141866	CBI19069.3	742	2	418	433	571	139	115	128	82.7338	626	6.1e-75	unnamed protein product [Vitis vinifera]
comp20121_c0	230	357112691	XP_003558141.1	504	48	215	312	366	56	38	48	67.8571	220	8.82e-20	PREDICTED: probable LRR receptor-like serine/threonine-protein kinase MRH1-like [Brachypodium distachyon]
comp20124_c0	669	224095202	XP_002310360.1	430	6	632	19	226	209	130	165	62.201	715	1.14e-89	predicted protein [Populus trichocarpa] >gi|222853263|gb|EEE90810.1| predicted protein [Populus trichocarpa]
comp20144_c0	251	392580193	EIW73320.1	322	3	251	140	222	83	82	83	98.7952	361	1.83e-40	hypothetical protein TREMEDRAFT_73043 [Tremella mesenterica DSM 1558]
comp20157_c0	210	242048646	XP_002462069.1	285	4	201	69	134	66	33	52	50	183	1.29e-15	hypothetical protein SORBIDRAFT_02g015941 [Sorghum bicolor] >gi|241925446|gb|EER98590.1| hypothetical protein SORBIDRAFT_02g015941 [Sorghum bicolor]
comp20200_c0	257	357116296	XP_003559918.1	575	2	256	193	277	85	72	80	84.7059	415	1.04e-46	PREDICTED: uncharacterized protein LOC100824745 [Brachypodium distachyon]
comp20203_c0	255	194694414	ACF81291.1	95	1	255	5	89	86	60	71	69.7674	322	4.64e-37	unknown [Zea mays]
comp20225_c0	212	389032451	AFK82362.1	155	2	211	25	94	70	57	64	81.4286	291	6.84e-32	40S ribosomal protein S6, partial [Ctenocephalides felis]
comp20239_c0	407	392575317	EIW68451.1	473	3	407	296	430	135	121	128	89.6296	485	1.99e-56	hypothetical protein TREMEDRAFT_44791 [Tremella mesenterica DSM 1558]
comp20246_c0	773	255562697	XP_002522354.1	704	2	643	19	235	217	93	134	42.8571	420	1.69e-44	pentatricopeptide repeat-containing protein, putative [Ricinus communis] >gi|223538432|gb|EEF40038.1| pentatricopeptide repeat-containing protein, putative [Ricinus communis]
comp20249_c0	241	327278993	XP_003224243.1	174	4	240	1	79	79	70	74	88.6076	299	1.07e-32	PREDICTED: myosin regulatory light chain 2, atrial isoform-like [Anolis carolinensis]
comp20254_c0	228	392580099	EIW73226.1	400	2	205	1	72	72	62	64	86.1111	325	8.16e-35	hypothetical protein TREMEDRAFT_37234 [Tremella mesenterica DSM 1558]
comp20255_c0	266	358400187	EHK49518.1	175	1	255	90	175	86	57	73	66.2791	311	2.38e-34	hypothetical protein TRIATDRAFT_189389 [Trichoderma atroviride IMI 206040]
comp20280_c0	369	293334155	NP_001170077.1	423	2	328	92	194	111	40	52	36.036	158	7.83e-11	uncharacterized protein LOC100383994 precursor [Zea mays] >gi|224033325|gb|ACN35738.1| unknown [Zea mays]
comp20284_c0	229	378725409	EHY51868.1	389	3	227	174	248	75	72	75	96	384	2.5e-43	isocitrate dehydrogenase [NAD] subunit 1, mitochondrial [Exophiala dermatitidis NIH/UT8656]
comp20295_c0	876	208609051	BAG72148.1	1558	60	422	1267	1388	122	38	63	31.1475	135	1.52e-06	hypothetical protein [Lotus japonicus] >gi|208609062|dbj|BAG72153.1| hypothetical protein [Lotus japonicus]
comp20335_c0	291	359487120	XP_002265814.2	561	2	289	315	410	96	67	82	69.7917	353	5.57e-38	PREDICTED: 65-kDa microtubule-associated protein 5-like [Vitis vinifera]
comp20335_c1	250	218196790	EEC79217.1	570	2	250	402	484	83	62	74	74.6988	322	7.87e-34	hypothetical protein OsI_19944 [Oryza sativa Indica Group]
comp20351_c0	215	219888481	ACL54615.1	376	2	181	285	343	60	35	42	58.3333	158	1.46e-11	unknown [Zea mays]
comp20363_c0	562	125542167	EAY88306.1	650	24	557	1	178	178	160	169	89.8876	896	9.55e-115	hypothetical protein OsI_09763 [Oryza sativa Indica Group]
comp20439_c0	317	224119848	XP_002331077.1	177	30	290	1	101	102	61	71	59.8039	287	1.47e-30	predicted protein [Populus trichocarpa] >gi|222872805|gb|EEF09936.1| predicted protein [Populus trichocarpa]
comp20476_c0	1693	347839259	CCD53831.1	474	193	1473	10	441	432	218	284	50.463	889	4.43e-110	similar to L-fucose:H+ symporter permease [Botryotinia fuckeliana]
comp20496_c0	444	194706692	ACF87430.1	396	1	444	212	360	149	77	98	51.6779	409	8.14e-46	unknown [Zea mays] >gi|195634741|gb|ACG36839.1| alpha-L-fucosidase 2 precursor [Zea mays]
comp20628_c0	294	356537055	XP_003537046.1	261	49	240	1	82	82	34	44	41.4634	139	4.87e-09	PREDICTED: uncharacterized protein LOC100813767 [Glycine max]
comp20669_c0	1223	30141019	BAC75923.1	461	185	1141	41	357	322	163	215	50.6211	845	7.81e-106	cysteine protease-1 [Helianthus annuus]
comp20673_c0	284	255555311	XP_002518692.1	274	182	283	241	274	34	30	34	88.2353	165	9.31e-13	conserved hypothetical protein [Ricinus communis] >gi|223542073|gb|EEF43617.1| conserved hypothetical protein [Ricinus communis]
comp20698_c0	1062	359494864	XP_003634857.1	155	432	767	11	113	112	71	80	63.3929	318	1.9e-32	PREDICTED: uncharacterized protein LOC100854976 [Vitis vinifera]
comp20717_c0	864	255587629	XP_002534335.1	578	4	468	1	176	183	60	97	32.7869	179	2.61e-12	RNA binding protein, putative [Ricinus communis] >gi|223525472|gb|EEF28048.1| RNA binding protein, putative [Ricinus communis]
comp20752_c0	1275	326489402	BAK01684.1	319	397	1161	26	281	258	170	208	65.8915	930	2.3e-120	predicted protein [Hordeum vulgare subsp. vulgare]
comp20769_c0	297	224060269	XP_002300115.1	68	1	78	1	26	26	24	26	92.3077	122	1.72e-07	predicted protein [Populus trichocarpa] >gi|222847373|gb|EEE84920.1| predicted protein [Populus trichocarpa]
comp20945_c0	802	255574363	XP_002528095.1	509	1	636	1	211	212	170	192	80.1887	809	4.83e-102	conserved hypothetical protein [Ricinus communis] >gi|223532484|gb|EEF34274.1| conserved hypothetical protein [Ricinus communis]
comp21011_c0	308	145408591	YP_001152215.1	44	3	107	2	36	35	28	28	80	127	2.51e-08	ORF44l [Pinus koraiensis] >gi|145048840|gb|ABP35457.1| ORF44l [Pinus koraiensis]
comp21076_c0	311	224113145	XP_002316406.1	108	60	218	33	85	53	29	35	54.717	150	4.67e-11	predicted protein [Populus trichocarpa] >gi|222865446|gb|EEF02577.1| predicted protein [Populus trichocarpa]
comp21245_c0	467	357134563	XP_003568886.1	469	123	467	1	115	115	114	115	99.1304	634	4.11e-78	PREDICTED: tubulin gamma-2 chain-like [Brachypodium distachyon]
comp21358_c0	491	15235498	NP_192184.1	781	6	407	551	682	134	68	90	50.7463	361	2.74e-37	pentatricopeptide repeat-containing protein [Arabidopsis thaliana] >gi|75213324|sp|Q9SY02.1|PP301_ARATH RecName: Full=Pentatricopeptide repeat-containing protein At4g02750 >gi|4263522|gb|AAD15348.1| hypothetical protein [Arabidopsis thaliana] >gi|7269760|emb|CAB77760.1| hypothetical protein [Arabidopsis thaliana] >gi|332656824|gb|AEE82224.1| pentatricopeptide repeat-containing protein [Arabidopsi…
comp21369_c0	1498	359482352	XP_002265779.2	388	207	1259	22	367	351	238	280	67.8063	1272	8.4e-170	PREDICTED: glucan endo-1,3-beta-glucosidase 11-like [Vitis vinifera]
comp21377_c0	279	357165963	XP_003580553.1	924	100	279	527	586	60	29	42	48.3333	150	7.84e-10	PREDICTED: peroxisome biogenesis protein 6-like [Brachypodium distachyon]
comp21384_c0	265	115467412	NP_001057305.1	365	2	265	187	271	88	49	64	55.6818	272	2.85e-27	Os06g0255000 [Oryza sativa Japonica Group] >gi|52076405|dbj|BAD45235.1| putative 2-oxoglutarate-dependent oxygenase [Oryza sativa Japonica Group] >gi|52077129|dbj|BAD46176.1| putative 2-oxoglutarate-dependent oxygenase [Oryza sativa Japonica Group] >gi|113595345|dbj|BAF19219.1| Os06g0255000 [Oryza sativa Japonica Group]
comp21429_c0	216	102139960	ABF70100.1	1016	1	216	690	761	72	62	69	86.1111	349	7.46e-37	protein kinase, putative [Musa balbisiana]
comp21489_c0	233	732905	CAA59470.1	258	1	189	5	67	63	49	54	77.7778	253	2.6e-25	orf [Pisum sativum]
comp21533_c0	216	357156244	XP_003577390.1	486	12	215	76	145	70	35	43	50	127	2.65e-07	PREDICTED: UDP-glycosyltransferase 72B1-like [Brachypodium distachyon]
comp21545_c0	1169	215769185	BAH01414.1	1124	154	1161	658	988	362	111	168	30.663	298	1.8e-26	unnamed protein product [Oryza sativa Japonica Group]
comp21573_c0	683	297834012	XP_002884888.1	301	216	680	147	301	155	79	101	50.9677	386	5.22e-42	predicted protein [Arabidopsis lyrata subsp. lyrata] >gi|297330728|gb|EFH61147.1| predicted protein [Arabidopsis lyrata subsp. lyrata]
comp21649_c0	247	326531234	BAK04968.1	565	1	246	220	304	85	58	69	68.2353	316	4.85e-33	predicted protein [Hordeum vulgare subsp. vulgare]
comp21696_c0	204	169159960	ACA49507.1	152	58	204	1	49	49	42	45	85.7143	213	1.93e-20	cytosolic superoxide dismutase [Cucumis sativus]
comp21745_c0	567	242034017	XP_002464403.1	122	240	350	73	109	37	24	27	64.8649	116	9.82e-06	hypothetical protein SORBIDRAFT_01g017620 [Sorghum bicolor] >gi|241918257|gb|EER91401.1| hypothetical protein SORBIDRAFT_01g017620 [Sorghum bicolor]
comp21746_c0	356	195655137	ACG47036.1	88	26	283	1	88	88	68	79	77.2727	352	3.71e-41	hypothetical protein [Zea mays]
comp21755_c0	1599	242056953	XP_002457622.1	419	195	1427	1	408	419	234	294	55.8473	1128	4.01e-147	hypothetical protein SORBIDRAFT_03g010545 [Sorghum bicolor] >gi|241929597|gb|EES02742.1| hypothetical protein SORBIDRAFT_03g010545 [Sorghum bicolor]
comp21758_c0	915	224062011	XP_002300710.1	206	42	569	11	179	176	93	119	52.8409	394	2.75e-43	predicted protein [Populus trichocarpa] >gi|222842436|gb|EEE79983.1| predicted protein [Populus trichocarpa]
comp21770_c0	421	125606241	EAZ45277.1	1033	2	421	165	304	140	116	130	82.8571	661	1.25e-78	hypothetical protein OsJ_29920 [Oryza sativa Japonica Group]
comp21773_c0	705	125553216	EAY98925.1	220	57	659	18	218	201	101	148	50.2488	588	4.17e-73	hypothetical protein OsI_20880 [Oryza sativa Indica Group] >gi|222632469|gb|EEE64601.1| hypothetical protein OsJ_19453 [Oryza sativa Japonica Group]
comp21778_c0	793	346703764	CBX24432.1	149	229	597	26	146	123	48	71	39.0244	196	4.26e-16	hypothetical_protein [Oryza glaberrima]
comp21810_c0	420	218184736	EEC67163.1	461	1	420	300	439	140	129	136	92.1429	710	6.19e-90	hypothetical protein OsI_34023 [Oryza sativa Indica Group]
comp21810_c1	220	297744172	CBI37142.3	547	2	220	320	392	73	67	71	91.7808	384	1.32e-42	unnamed protein product [Vitis vinifera]
comp21813_c0	255	326505570	BAJ95456.1	342	1	255	19	103	85	77	81	90.5882	410	1.81e-47	predicted protein [Hordeum vulgare subsp. vulgare]
comp21835_c0	1536	225460995	XP_002278340.1	414	215	559	1	125	125	59	77	47.2	282	6.37e-25	PREDICTED: uncharacterized protein LOC100257339 [Vitis vinifera] >gi|297737428|emb|CBI26629.3| unnamed protein product [Vitis vinifera]
comp21844_c0	2465	242062638	XP_002452608.1	485	808	2031	63	474	412	215	292	52.1845	1143	1.44e-144	hypothetical protein SORBIDRAFT_04g028970 [Sorghum bicolor] >gi|241932439|gb|EES05584.1| hypothetical protein SORBIDRAFT_04g028970 [Sorghum bicolor]
comp21867_c0	2121	359481121	XP_002264844.2	440	417	1685	8	430	437	256	318	58.5812	1260	3.12e-164	PREDICTED: BTB/POZ domain-containing protein At3g05675-like [Vitis vinifera]
comp21913_c0	1526	226491271	NP_001149749.1	409	52	1269	3	405	407	324	359	79.6069	1692	0	3-isopropylmalate dehydrogenase 2 [Zea mays] >gi|195631103|gb|ACG36652.1| 3-isopropylmalate dehydrogenase 2 [Zea mays]
comp21914_c0	505	296088828	CBI38286.3	177	178	504	29	137	109	101	105	92.6606	461	1.24e-55	unnamed protein product [Vitis vinifera]
comp21916_c0	804	225442579	XP_002279118.1	156	242	640	22	153	133	71	102	53.3835	378	5.36e-42	PREDICTED: acyl-coenzyme A thioesterase 13 [Vitis vinifera]
comp21917_c0	548	192910838	ACF06527.1	310	2	547	13	195	183	151	163	82.5137	653	1.88e-82	secretory carrier membrane protein [Elaeis guineensis]
comp21921_c0	564	308080213	NP_001182797.1	129	75	341	18	118	107	36	50	33.6449	117	6.6e-06	uncharacterized protein LOC100500994 [Zea mays] >gi|195646552|gb|ACG42744.1| hypothetical protein [Zea mays]
comp21923_c0	928	225429680	XP_002281459.1	228	154	750	30	228	202	134	159	66.3366	630	3.75e-78	PREDICTED: uncharacterized protein LOC100257849 [Vitis vinifera]
comp21924_c0	799	346467945	AEO33817.1	177	153	677	1	177	177	158	165	89.2655	824	7.48e-109	hypothetical protein [Amblyomma maculatum]
comp21925_c0	553	224073880	XP_002304192.1	284	130	294	1	55	55	40	53	72.7273	237	2.07e-21	predicted protein [Populus trichocarpa] >gi|222841624|gb|EEE79171.1| predicted protein [Populus trichocarpa]
comp21928_c0	1138	255587396	XP_002534259.1	155	188	613	9	155	148	63	93	42.5676	226	1.13e-19	conserved hypothetical protein [Ricinus communis] >gi|223525630|gb|EEF28125.1| conserved hypothetical protein [Ricinus communis]
comp21929_c0	1748	225432880	XP_002284047.1	313	100	1017	4	313	315	198	225	62.8571	620	3.28e-72	PREDICTED: transcription factor UNE12 [Vitis vinifera] >gi|297737150|emb|CBI26351.3| unnamed protein product [Vitis vinifera]
comp21933_c0	1709	224066857	XP_002302248.1	409	268	1419	25	408	384	335	365	87.2396	1832	0	predicted protein [Populus trichocarpa] >gi|222843974|gb|EEE81521.1| predicted protein [Populus trichocarpa]
comp21934_c0	595	297735234	CBI17596.3	127	90	302	57	127	71	69	70	97.1831	352	2.14e-39	unnamed protein product [Vitis vinifera]
comp21937_c0	1788	359484994	XP_003633196.1	475	249	1604	1	460	460	336	391	73.0435	1679	0	PREDICTED: general transcription factor IIE subunit 1-like [Vitis vinifera] >gi|297735317|emb|CBI17757.3| unnamed protein product [Vitis vinifera]
comp21939_c0	1016	225448984	XP_002270699.1	200	275	871	1	199	199	181	187	90.9548	934	5.45e-124	PREDICTED: ras-related protein RABF1 [Vitis vinifera] >gi|147864853|emb|CAN79376.1| hypothetical protein VITISV_009584 [Vitis vinifera] >gi|296085986|emb|CBI31427.3| unnamed protein product [Vitis vinifera]
comp21941_c0	396	297834156	XP_002884960.1	157	187	372	65	127	63	37	49	58.7302	185	1.99e-15	DNAJ heat shock N-terminal domain-containing protein [Arabidopsis lyrata subsp. lyrata] >gi|297330800|gb|EFH61219.1| DNAJ heat shock N-terminal domain-containing protein [Arabidopsis lyrata subsp. lyrata]
comp21944_c0	262	193848513	ACF22703.1	1109	2	262	967	1053	87	86	86	98.8506	474	1.59e-53	serine/threonine protein kinase [Brachypodium distachyon]
comp21945_c0	397	378405606	AFB82642.1	423	256	396	377	423	47	46	47	97.8723	243	1.4e-22	ATP-citrate synthase [Camellia sinensis]
comp21954_c0	1309	224064252	XP_002301410.1	175	494	946	23	173	151	128	138	84.7682	692	1.55e-86	predicted protein [Populus trichocarpa] >gi|222843136|gb|EEE80683.1| predicted protein [Populus trichocarpa]
comp21955_c0	2102	62701920	AAX92993.1	534	396	1889	39	529	499	369	433	73.9479	1953	0	signal peptide peptidase, putative [Oryza sativa Japonica Group] >gi|77550327|gb|ABA93124.1| signal peptide peptidase family protein, expressed [Oryza sativa Japonica Group] >gi|108864334|gb|ABG22469.1| signal peptide peptidase family protein, expressed [Oryza sativa Japonica Group] >gi|218185664|gb|EEC68091.1| hypothetical protein OsI_35966 [Oryza sativa Indica Group] >gi|222615916|gb|EEE52048.1…
comp21961_c0	1663	357145321	XP_003573602.1	362	377	1420	1	361	367	149	203	40.5995	593	6.13e-68	PREDICTED: uncharacterized protein LOC100826256 [Brachypodium distachyon]
comp21962_c0	708	296086730	CBI32365.3	144	41	355	24	128	105	98	101	93.3333	499	9.23e-61	unnamed protein product [Vitis vinifera]
comp21963_c0	2132	225434664	XP_002280187.1	315	1458	1865	20	147	136	84	103	61.7647	403	4.98e-41	PREDICTED: uncharacterized protein LOC100260337 [Vitis vinifera] >gi|297745939|emb|CBI15995.3| unnamed protein product [Vitis vinifera]
comp21964_c0	1243	115444771	NP_001046165.1	225	296	787	58	221	165	137	153	83.0303	715	1.47e-89	Os02g0192700 [Oryza sativa Japonica Group] >gi|75139348|sp|Q7F8S5.1|PR2E2_ORYSJ RecName: Full=Peroxiredoxin-2E-2, chloroplastic; AltName: Full=Peroxiredoxin IIE-2; AltName: Full=Thioredoxin reductase 2E-2; Flags: Precursor >gi|46389828|dbj|BAD15391.1| putative thioredoxin peroxidase [Oryza sativa Japonica Group] >gi|50726415|dbj|BAD34026.1| putative thioredoxin peroxidase [Oryza sativa Japonica G…
comp21965_c0	713	156530455	ABU75308.1	112	71	406	1	112	112	102	108	91.0714	478	6.67e-58	ribosomal protein L30e [Pisum sativum]
comp21970_c0	2586	359487032	XP_002265178.2	676	165	2180	1	676	678	556	612	82.0059	2737	0	PREDICTED: nucleolar GTP-binding protein 1-like [Vitis vinifera]
comp21973_c0	1106	297741150	CBI31881.3	261	252	899	47	260	216	184	199	85.1852	900	1.58e-117	unnamed protein product [Vitis vinifera]
comp21977_c0	674	1346485	P34105.3	591	1	375	1	126	127	105	118	82.6772	477	5.05e-53	RecName: Full=NADP-dependent malic enzyme; Short=NADP-ME >gi|20469|emb|CAA39690.1| malic enzyme [Populus trichocarpa]
comp21979_c0	275	192913032	ACF06624.1	159	2	274	5	95	91	89	91	97.8022	398	1.63e-47	40S ribosomal protein S11 [Elaeis guineensis]
comp21981_c0	1745	224071579	XP_002303525.1	410	216	959	2	243	248	185	206	74.5968	872	2.96e-108	predicted protein [Populus trichocarpa] >gi|222840957|gb|EEE78504.1| predicted protein [Populus trichocarpa]
comp21983_c0	656	255564641	XP_002523315.1	88	358	522	10	64	55	42	53	76.3636	148	3.2e-10	conserved hypothetical protein [Ricinus communis] >gi|223537403|gb|EEF39031.1| conserved hypothetical protein [Ricinus communis]
comp21987_c0	1245	326496286	BAJ94605.1	240	669	1115	105	233	151	67	92	44.3709	332	3.94e-33	predicted protein [Hordeum vulgare subsp. vulgare]
comp21992_c0	1870	357448641	XP_003594596.1	445	394	1683	1	430	430	428	430	99.5349	2260	0	Tubulin beta chain [Medicago truncatula] >gi|355483644|gb|AES64847.1| Tubulin beta chain [Medicago truncatula]
comp21997_c0	1265	76574238	ABA46900.1	180	643	1137	15	180	166	130	141	78.3133	704	1.87e-88	chloroplast ribulose-1,5-bisphosphate carboxylase/oxygenase small subunit [Musa acuminata AAA Group]
comp21998_c0	1172	357436101	XP_003588326.1	1116	1002	1172	1005	1061	57	53	55	92.9825	274	3.48e-40	ATP synthase subunit alpha [Medicago truncatula] >gi|355477374|gb|AES58577.1| ATP synthase subunit alpha [Medicago truncatula]
comp21998_c1	540	357436101	XP_003588326.1	1116	2	199	935	1000	66	66	66	100	360	1.28e-36	ATP synthase subunit alpha [Medicago truncatula] >gi|355477374|gb|AES58577.1| ATP synthase subunit alpha [Medicago truncatula]
comp21999_c0	1269	388510684	AFK43408.1	107	213	533	1	107	107	83	88	77.5701	438	6.93e-50	unknown [Lotus japonicus]
comp22000_c0	1144	356569914	XP_003553139.1	188	492	917	20	172	154	66	90	42.8571	176	1.68e-12	PREDICTED: uncharacterized protein LOC100817673 [Glycine max]
comp22002_c0	1251	115445213	NP_001046386.1	182	147	683	4	182	179	175	176	97.7654	834	5.6e-108	Os02g0235600 [Oryza sativa Japonica Group] >gi|113535917|dbj|BAF08300.1| Os02g0235600 [Oryza sativa Japonica Group] >gi|215767774|dbj|BAH00003.1| unnamed protein product [Oryza sativa Japonica Group]
comp22003_c0	719	357114478	XP_003559027.1	186	93	344	103	186	84	60	77	71.4286	336	9.31e-36	PREDICTED: uncharacterized protein LOC100840668 [Brachypodium distachyon] >gi|193848563|gb|ACF22748.1| proline-rich protein [Brachypodium distachyon]
comp22005_c0	272	212292267	ACJ24167.1	324	1	270	5	86	90	70	78	77.7778	351	9.65e-39	Rack [Phaseolus vulgaris]
comp22008_c0	1176	297739893	CBI30075.3	175	397	756	48	174	127	67	90	52.7559	252	5.77e-23	unnamed protein product [Vitis vinifera]
comp22010_c0	1992	225459014	XP_002285605.1	516	407	1915	11	516	507	449	480	88.5602	2433	0	PREDICTED: serine hydroxymethyltransferase, mitochondrial [Vitis vinifera]
comp22013_c0	1483	225461502	XP_002282598.1	204	435	770	84	204	121	81	90	66.9421	359	7.61e-37	PREDICTED: squamosa promoter-binding-like protein 4 [Vitis vinifera] >gi|302142976|emb|CBI20271.3| unnamed protein product [Vitis vinifera]
comp22017_c0	235	899115	AAA96951.1	99	2	235	2	79	78	78	78	100	400	6.83e-49	polyubiquitin, partial [Solanum tuberosum]
comp22019_c0	817	224143018	XP_002324820.1	112	28	300	9	99	91	76	83	83.5165	417	2.71e-48	predicted protein [Populus trichocarpa] >gi|222866254|gb|EEF03385.1| predicted protein [Populus trichocarpa]
comp22020_c0	1315	192910800	ACF06508.1	270	379	1188	1	269	270	215	241	79.6296	998	4.1e-131	senescence-associated protein [Elaeis guineensis]
comp22021_c0	240	356516007	XP_003526688.1	156	150	239	6	35	30	28	29	93.3333	144	2.56e-10	PREDICTED: ubiquitin-conjugating enzyme E2 10-like [Glycine max]
comp22021_c1	217	346464769	AEO32229.1	147	2	217	29	100	72	71	72	98.6111	385	4.22e-46	hypothetical protein [Amblyomma maculatum]
comp22022_c0	933	54888728	BAD67183.1	149	186	584	2	148	148	53	78	35.8108	236	2.84e-21	mannose specific lectin [Dioscorea polystachya]
comp22023_c0	705	326487844	BAJ89761.1	162	77	484	2	137	136	98	115	72.0588	543	4.37e-67	predicted protein [Hordeum vulgare subsp. vulgare]
comp22025_c0	1067	225459777	XP_002285906.1	223	100	753	5	222	218	134	168	61.4679	732	7.61e-93	PREDICTED: glutathione S-transferase PARB [Vitis vinifera] >gi|147780605|emb|CAN69111.1| hypothetical protein VITISV_031837 [Vitis vinifera] >gi|302141701|emb|CBI18904.3| unnamed protein product [Vitis vinifera]
comp22029_c0	305	296081996	CBI21001.3	305	1	195	60	126	67	49	49	73.1343	233	7.38e-22	unnamed protein product [Vitis vinifera]
comp22030_c0	1354	242054169	XP_002456230.1	221	331	993	1	221	221	183	210	82.8054	860	7.27e-111	hypothetical protein SORBIDRAFT_03g032510 [Sorghum bicolor] >gi|241928205|gb|EES01350.1| hypothetical protein SORBIDRAFT_03g032510 [Sorghum bicolor]
comp22032_c0	819	147819973	CAN78303.1	128	290	661	5	128	124	110	118	88.7097	581	8.76e-73	hypothetical protein VITISV_026634 [Vitis vinifera]
comp22033_c0	917	225430768	XP_002267591.1	154	70	531	1	154	154	136	144	88.3117	620	1.07e-77	PREDICTED: MIP18 family protein At1g68310-like [Vitis vinifera]
comp22038_c0	723	226504806	NP_001143471.1	115	130	375	32	113	82	68	74	82.9268	380	3.06e-43	uncharacterized protein LOC100276139 [Zea mays] >gi|195621128|gb|ACG32394.1| hypothetical protein [Zea mays]
comp22039_c0	2925	357148055	XP_003574607.1	908	202	2829	1	904	908	684	780	75.3304	3668	0	PREDICTED: LOW QUALITY PROTEIN: nitrate reductase [NADH]-like [Brachypodium distachyon]
comp22043_c0	1602	224030007	ACN34079.1	432	242	1348	64	432	369	336	352	91.0569	1827	0	unknown [Zea mays]
comp22046_c0	623	116792892	ABK26542.1	91	324	563	11	90	80	78	78	97.5	408	3.33e-48	unknown [Picea sitchensis]
comp22047_c0	890	224070903	XP_002303289.1	94	207	479	1	91	91	76	85	83.5165	416	3.48e-48	predicted protein [Populus trichocarpa] >gi|222840721|gb|EEE78268.1| predicted protein [Populus trichocarpa]
comp22048_c0	407	8439545	AAF74983.1	765	1	405	333	467	135	123	128	91.1111	627	5.34e-75	methionine synthase [Solanum tuberosum]
comp22052_c0	1289	225457683	XP_002276703.1	376	21	1082	16	371	356	240	297	67.4157	1283	9.01e-173	PREDICTED: probable mannitol dehydrogenase [Vitis vinifera] >gi|297745619|emb|CBI40784.3| unnamed protein product [Vitis vinifera]
comp22053_c0	629	332629593	BAK22528.1	221	3	371	99	221	123	90	106	73.1707	493	3.13e-59	tau glutathione S-transferase [Allium cepa]
comp22056_c0	1573	2213877	AAB61597.1	356	423	1454	13	356	344	317	335	92.1512	1641	0	glutamine synthetase [Hevea brasiliensis]
comp22057_c0	1987	359480735	XP_002277938.2	448	308	1654	1	448	449	377	413	83.9644	1982	0	PREDICTED: polypyrimidine tract-binding protein homolog 3-like isoform 1 [Vitis vinifera]
comp22059_c0	1218	225459322	XP_002285797.1	304	18	914	2	304	304	207	244	68.0921	995	1.41e-130	PREDICTED: uncharacterized protein LOC100260886 isoform 2 [Vitis vinifera]
comp22061_c0	1651	255552604	XP_002517345.1	465	199	1455	34	465	432	338	368	78.2407	1766	0	peptidyl-prolyl cis-trans isomerase, putative [Ricinus communis] >gi|223543356|gb|EEF44887.1| peptidyl-prolyl cis-trans isomerase, putative [Ricinus communis]
comp22070_c0	528	388498974	AFK37553.1	140	90	395	48	140	102	60	74	58.8235	305	1.61e-32	unknown [Medicago truncatula]
comp22075_c0	266	225426397	XP_002272455.1	248	66	266	5	71	67	55	64	82.0896	308	3.86e-33	PREDICTED: glutathione S-transferase T1 [Vitis vinifera]
comp22079_c0	3586	222632561	EEE64693.1	1062	244	3318	39	1062	1028	724	857	70.428	3562	0	hypothetical protein OsJ_19548 [Oryza sativa Japonica Group]
comp22081_c0	265	356533043	XP_003535078.1	846	2	265	31	118	88	86	88	97.7273	478	9.96e-55	PREDICTED: homeobox-leucine zipper protein ATHB-14-like [Glycine max]
comp22084_c0	543	49328110	AAT58808.1	799	387	542	108	159	52	36	43	69.2308	225	9.41e-19	hypothetical protein [Oryza sativa Japonica Group]
comp22084_c1	934	224127372	XP_002329261.1	345	1	852	8	298	293	176	224	60.0683	807	4.65e-103	predicted protein [Populus trichocarpa] >gi|222870715|gb|EEF07846.1| predicted protein [Populus trichocarpa]
comp22097_c0	1471	296089631	CBI39450.3	294	211	1077	10	294	289	228	257	78.8927	1252	2.08e-168	unnamed protein product [Vitis vinifera]
comp22102_c0	684	125555996	EAZ01602.1	127	72	443	1	127	127	69	88	54.3307	345	4.79e-38	hypothetical protein OsI_23639 [Oryza sativa Indica Group]
comp22103_c0	809	242072552	XP_002446212.1	538	146	808	1	233	241	159	177	65.9751	742	1.06e-91	hypothetical protein SORBIDRAFT_06g004300 [Sorghum bicolor] >gi|241937395|gb|EES10540.1| hypothetical protein SORBIDRAFT_06g004300 [Sorghum bicolor]
comp22105_c0	871	226508908	NP_001148300.1	128	326	571	46	127	82	51	64	62.1951	254	3.52e-24	cortical cell-delineating protein precursor [Zea mays] >gi|195617258|gb|ACG30459.1| cortical cell-delineating protein precursor [Zea mays]
comp22108_c0	604	358349222	XP_003638638.1	652	323	604	18	111	94	80	88	85.1064	456	3.35e-50	Serine/threonine protein phosphatase 2A 55 kDa regulatory subunit B beta isoform [Medicago truncatula] >gi|355504573|gb|AES85776.1| Serine/threonine protein phosphatase 2A 55 kDa regulatory subunit B beta isoform [Medicago truncatula]
comp22123_c0	1471	225455475	XP_002280043.1	237	481	927	73	236	164	87	105	53.0488	367	1.25e-37	PREDICTED: ethylene-responsive transcription factor ERF025-like [Vitis vinifera]
comp22129_c0	1088	295913538	ADG58017.1	165	573	998	19	164	146	124	129	84.9315	614	6.38e-76	transcription factor [Lycoris longituba]
comp22130_c0	2368	357150238	XP_003575390.1	583	270	1271	1	332	340	237	269	69.7059	1201	0	PREDICTED: lysyl-tRNA synthetase-like [Brachypodium distachyon]
comp22132_c0	2261	225448982	XP_002270524.1	628	237	2093	4	621	620	414	496	66.7742	2053	0	PREDICTED: U-box domain-containing protein 14 [Vitis vinifera]
comp22134_c0	234	357115104	XP_003559332.1	206	3	173	2	58	57	54	55	94.7368	273	1.36e-28	PREDICTED: 60S ribosomal protein L13a-4-like [Brachypodium distachyon]
comp22136_c0	362	296090690	CBI41090.3	69	2	106	1	35	35	35	35	100	176	4.52e-15	unnamed protein product [Vitis vinifera]
comp22143_c1	1110	225430312	XP_002285183.1	215	254	835	31	214	199	127	152	63.8191	537	1.41e-63	PREDICTED: uncharacterized protein LOC100250997 [Vitis vinifera]
comp22156_c0	1901	255548002	XP_002515058.1	478	242	1396	78	478	401	303	340	75.5611	1589	0	copine, putative [Ricinus communis] >gi|223546109|gb|EEF47612.1| copine, putative [Ricinus communis]
comp22157_c0	628	388498294	AFK37213.1	87	302	562	1	87	87	85	87	97.7011	443	1.82e-53	unknown [Medicago truncatula]
comp22158_c0	4075	359487112	XP_002271241.2	1227	494	3832	105	1206	1114	678	855	60.8618	3616	0	PREDICTED: phospholipid-transporting ATPase 1-like [Vitis vinifera]
comp22160_c0	598	125582167	EAZ23098.1	181	2	361	51	179	131	69	87	52.6718	310	1.82e-32	hypothetical protein OsJ_06792 [Oryza sativa Japonica Group]
comp22166_c0	1630	225459538	XP_002285848.1	418	261	1415	26	410	386	273	319	70.7254	1347	5.71e-180	PREDICTED: lysM domain-containing GPI-anchored protein 1 [Vitis vinifera]
comp22170_c0	969	225435644	XP_002285666.1	183	377	850	31	183	160	110	122	68.75	546	4.77e-66	PREDICTED: uncharacterized protein LOC100241679 [Vitis vinifera]
comp22186_c0	684	356548725	XP_003542750.1	157	61	510	8	157	151	77	111	50.9934	287	4.67e-29	PREDICTED: probable calcium-binding protein CML29-like [Glycine max]
comp22203_c0	451	357125585	XP_003564473.1	105	267	344	79	104	26	21	24	80.7692	124	3.68e-07	PREDICTED: uncharacterized protein LOC100832316 [Brachypodium distachyon]
comp22217_c0	1045	225459870	XP_002285933.1	243	199	891	1	230	231	200	224	86.5801	1004	7.1e-134	PREDICTED: dolichol-phosphate mannosyltransferase [Vitis vinifera] >gi|302141662|emb|CBI18865.3| unnamed protein product [Vitis vinifera]
comp22227_c0	1639	225449855	XP_002265000.1	314	783	1433	12	221	218	116	152	53.211	581	5.21e-85	PREDICTED: annexin D4 [Vitis vinifera] >gi|147852972|emb|CAN79077.1| hypothetical protein VITISV_016344 [Vitis vinifera] >gi|296081279|emb|CBI17723.3| unnamed protein product [Vitis vinifera]
comp22261_c0	272	255548872	XP_002515492.1	220	32	271	1	80	80	68	76	85	376	1.7e-43	Vesicle-associated membrane protein, putative [Ricinus communis] >gi|223545436|gb|EEF46941.1| Vesicle-associated membrane protein, putative [Ricinus communis]
comp22278_c0	1593	224074883	XP_002304474.1	321	347	1285	4	319	316	231	270	73.1013	891	5.56e-113	predicted protein [Populus trichocarpa] >gi|222841906|gb|EEE79453.1| predicted protein [Populus trichocarpa]
comp22289_c0	1844	357111946	XP_003557771.1	357	293	1339	6	356	351	228	281	64.9573	1225	1.79e-161	PREDICTED: uncharacterized protein LOC100845427 [Brachypodium distachyon]
comp22291_c0	972	359473751	XP_003631355.1	97	247	501	4	88	85	69	81	81.1765	363	5.37e-40	PREDICTED: uncharacterized protein LOC100852520 [Vitis vinifera]
comp22304_c0	1216	218194478	EEC76905.1	547	298	1215	242	547	306	256	289	83.6601	1314	2.55e-175	hypothetical protein OsI_15137 [Oryza sativa Indica Group]
comp22310_c0	1344	357447553	XP_003594052.1	301	323	1135	31	301	271	213	242	78.5978	1122	2.8e-149	Prolyl 4-hydroxylase alpha subunit-like protein [Medicago truncatula] >gi|355483100|gb|AES64303.1| Prolyl 4-hydroxylase alpha subunit-like protein [Medicago truncatula]
comp22382_c0	265	225434859	XP_002282236.1	472	181	264	445	472	28	26	28	92.8571	145	1.86e-09	PREDICTED: ribulose bisphosphate carboxylase/oxygenase activase 2, chloroplastic isoform 1 [Vitis vinifera] >gi|297746032|emb|CBI16088.3| unnamed protein product [Vitis vinifera]
comp22392_c0	234	224099571	XP_002311536.1	1133	2	232	208	284	77	50	57	64.9351	252	9.98e-24	rna-dependent RNA polymerase [Populus trichocarpa] >gi|222851356|gb|EEE88903.1| rna-dependent RNA polymerase [Populus trichocarpa]
comp22396_c0	397	223948395	ACN28281.1	87	175	393	8	80	73	49	54	67.1233	264	9.56e-28	unknown [Zea mays]
comp22397_c0	431	194706518	ACF87343.1	96	2	217	9	80	72	69	69	95.8333	202	2.83e-18	unknown [Zea mays]
comp22401_c0	1142	225466099	XP_002266174.1	196	259	684	54	195	142	103	117	72.5352	386	1.86e-41	PREDICTED: protein PAM68, chloroplastic [Vitis vinifera] >gi|147866231|emb|CAN79943.1| hypothetical protein VITISV_021078 [Vitis vinifera]
comp22437_c0	1216	115488276	NP_001066625.1	367	124	1050	55	367	313	240	273	76.6773	1303	2.54e-176	Os12g0405200 [Oryza sativa Japonica Group] >gi|77554747|gb|ABA97543.1| expressed protein [Oryza sativa Japonica Group] >gi|113649132|dbj|BAF29644.1| Os12g0405200 [Oryza sativa Japonica Group] >gi|215694641|dbj|BAG89832.1| unnamed protein product [Oryza sativa Japonica Group] >gi|222616954|gb|EEE53086.1| hypothetical protein OsJ_35845 [Oryza sativa Japonica Group]
comp22443_c0	846	351727411	NP_001236136.1	167	60	539	1	160	160	111	136	69.375	608	4.75e-76	uncharacterized protein LOC100306513 [Glycine max] >gi|255628745|gb|ACU14717.1| unknown [Glycine max]
comp22452_c0	1358	224145092	XP_002325524.1	113	790	1113	1	108	108	101	105	93.5185	554	1.46e-66	predicted protein [Populus trichocarpa] >gi|118489461|gb|ABK96533.1| unknown [Populus trichocarpa x Populus deltoides] >gi|222862399|gb|EEE99905.1| predicted protein [Populus trichocarpa]
comp22479_c0	2426	255557825	XP_002519942.1	634	329	2203	27	619	626	425	499	67.8914	1874	0	ATP-binding cassette transporter, putative [Ricinus communis] >gi|223540988|gb|EEF42546.1| ATP-binding cassette transporter, putative [Ricinus communis]
comp22483_c1	829	224132456	XP_002328279.1	156	296	775	3	152	163	77	110	47.2393	334	1.85e-35	predicted protein [Populus trichocarpa] >gi|222837794|gb|EEE76159.1| predicted protein [Populus trichocarpa]
comp22496_c0	1192	225447221	XP_002277789.1	171	414	788	44	171	128	99	116	77.3438	530	8.01e-63	PREDICTED: thylakoid lumenal protein At1g03610, chloroplastic-like [Vitis vinifera]
comp22506_c0	559	357125314	XP_003564339.1	149	320	496	77	147	71	39	47	54.9296	169	7.77e-13	PREDICTED: uncharacterized protein LOC100843244 [Brachypodium distachyon]
comp22518_c0	910	357454899	XP_003597730.1	171	261	683	29	171	143	97	110	67.8322	513	1.63e-61	Cornifelin-like protein [Medicago truncatula] >gi|87240433|gb|ABD32291.1| Uncharacterized Cys-rich domain [Medicago truncatula] >gi|355486778|gb|AES67981.1| Cornifelin-like protein [Medicago truncatula] >gi|388495596|gb|AFK35864.1| unknown [Medicago truncatula]
comp22525_c0	636	357136709	XP_003569946.1	229	169	600	54	221	168	87	113	51.7857	473	5.96e-56	PREDICTED: GEM-like protein 4-like [Brachypodium distachyon]
comp22528_c0	226	255568693	XP_002525318.1	209	2	226	71	145	75	75	75	100	407	1.39e-48	phd finger transcription factor, putative [Ricinus communis] >gi|223535377|gb|EEF37051.1| phd finger transcription factor, putative [Ricinus communis]
comp22539_c0	289	296082285	CBI21290.3	284	187	288	71	104	34	32	34	94.1176	159	7.93e-12	unnamed protein product [Vitis vinifera]
comp22543_c0	1207	225426700	XP_002281850.1	322	234	971	67	313	247	189	208	76.5182	903	1.4e-116	PREDICTED: copper chaperone for superoxide dismutase-like [Vitis vinifera]
comp22549_c0	2029	255556025	XP_002519047.1	500	138	1649	1	500	504	351	421	69.6429	1709	0	allantoinase, putative [Ricinus communis] >gi|223541710|gb|EEF43258.1| allantoinase, putative [Ricinus communis]
comp22568_c0	572	224124790	XP_002329949.1	216	1	96	1	32	32	30	30	93.75	155	1.2e-10	predicted protein [Populus trichocarpa] >gi|222871971|gb|EEF09102.1| predicted protein [Populus trichocarpa]
comp22569_c0	2266	356525201	XP_003531215.1	440	712	2004	1	437	437	319	369	72.9977	1142	6.75e-146	PREDICTED: microfibrillar-associated protein 1-like [Glycine max]
comp22571_c0	856	255584813	XP_002533124.1	483	2	409	270	423	155	99	112	63.871	445	2.57e-48	polypyrimidine tract binding protein, putative [Ricinus communis] >gi|223527087|gb|EEF29269.1| polypyrimidine tract binding protein, putative [Ricinus communis]
comp22574_c0	2412	297739953	CBI30135.3	624	417	2279	1	624	630	373	476	59.2063	1956	0	unnamed protein product [Vitis vinifera]
comp22584_c0	1029	242041091	XP_002467940.1	129	176	520	15	129	115	104	113	90.4348	577	4.43e-71	hypothetical protein SORBIDRAFT_01g036830 [Sorghum bicolor] >gi|241921794|gb|EER94938.1| hypothetical protein SORBIDRAFT_01g036830 [Sorghum bicolor]
comp22595_c0	755	225449489	XP_002283485.1	154	77	535	1	152	154	93	119	60.3896	495	9.55e-60	PREDICTED: elicitor-responsive protein 1 [Vitis vinifera] >gi|296086227|emb|CBI31668.3| unnamed protein product [Vitis vinifera]
comp22600_c0	485	297742495	CBI34644.3	497	1	432	1	168	176	102	106	57.9545	392	1.64e-42	unnamed protein product [Vitis vinifera]
comp22605_c0	255	255581297	XP_002531459.1	309	1	255	129	213	85	61	67	71.7647	256	2.6e-25	Flavonol synthase/flavanone 3-hydroxylase, putative [Ricinus communis] >gi|223528913|gb|EEF30909.1| Flavonol synthase/flavanone 3-hydroxylase, putative [Ricinus communis]
comp22608_c0	505	356548739	XP_003542757.1	247	325	504	1	60	60	55	56	91.6667	288	4.38e-29	PREDICTED: uncharacterized protein LOC100786183 [Glycine max]
comp22608_c1	299	242039199	XP_002466994.1	242	2	298	49	147	99	82	94	82.8283	350	2.94e-39	hypothetical protein SORBIDRAFT_01g018050 [Sorghum bicolor] >gi|241920848|gb|EER93992.1| hypothetical protein SORBIDRAFT_01g018050 [Sorghum bicolor]
comp22616_c0	290	326523329	BAJ88705.1	574	4	288	303	398	96	64	81	66.6667	344	9.81e-37	predicted protein [Hordeum vulgare subsp. vulgare]
comp22625_c0	1077	297607699	NP_001060451.2	194	465	890	22	163	142	95	127	66.9014	547	1.57e-65	Os07g0645000 [Oryza sativa Japonica Group] >gi|22093725|dbj|BAC07018.1| unknown protein [Oryza sativa Japonica Group] >gi|125601289|gb|EAZ40865.1| hypothetical protein OsJ_25346 [Oryza sativa Japonica Group] >gi|215769010|dbj|BAH01239.1| unnamed protein product [Oryza sativa Japonica Group] >gi|255678011|dbj|BAF22365.2| Os07g0645000 [Oryza sativa Japonica Group]
comp22632_c0	203	17027268	AAL34122.1	228	54	197	3	50	48	31	42	64.5833	170	5.35e-14	hypothetical protein [Oryza sativa Japonica Group]
comp22634_c0	946	356556098	XP_003546364.1	122	154	465	1	122	122	78	91	63.9344	409	1.71e-46	PREDICTED: dynein light chain 2, cytoplasmic-like [Glycine max]
comp22642_c0	1633	357110714	XP_003557161.1	444	379	1467	70	437	368	240	297	65.2174	1293	1.95e-171	PREDICTED: probable leucine-rich repeat receptor-like protein kinase At4g00330-like [Brachypodium distachyon]
comp22683_c0	664	125547853	EAY93675.1	151	249	530	42	147	106	55	69	51.8868	262	1.58e-25	hypothetical protein OsI_15462 [Oryza sativa Indica Group]
comp22693_c0	612	388497820	AFK36976.1	261	75	569	25	183	167	78	106	46.7066	301	2.39e-30	unknown [Lotus japonicus]
comp22694_c0	696	255555293	XP_002518683.1	286	225	623	24	164	141	89	111	63.1206	451	9.53e-52	conserved hypothetical protein [Ricinus communis] >gi|223542064|gb|EEF43608.1| conserved hypothetical protein [Ricinus communis]
comp22702_c0	653	25044847	AAM28295.1	112	99	317	36	109	74	32	51	43.2432	168	7.82e-13	PVR3-like protein, partial [Ananas comosus]
comp22705_c0	460	302142029	CBI19232.3	246	13	270	95	176	86	62	68	72.093	329	2.4e-35	unnamed protein product [Vitis vinifera]
comp22714_c0	807	224054368	XP_002298225.1	146	95	529	1	146	147	84	106	57.1429	389	7.71e-44	predicted protein [Populus trichocarpa] >gi|222845483|gb|EEE83030.1| predicted protein [Populus trichocarpa]
comp22715_c0	1957	255576897	XP_002529334.1	496	244	1635	38	495	465	283	361	60.8602	1565	0	cytochrome P450, putative [Ricinus communis] >gi|223531205|gb|EEF33051.1| cytochrome P450, putative [Ricinus communis]
comp22716_c0	338	224095286	XP_002310371.1	444	1	246	1	82	82	78	81	95.122	432	2.35e-49	predicted protein [Populus trichocarpa] >gi|222853274|gb|EEE90821.1| predicted protein [Populus trichocarpa]
comp22737_c0	965	357148424	XP_003574758.1	117	285	635	1	117	117	113	117	96.5812	372	4.58e-41	PREDICTED: uncharacterized protein LOC100824514 [Brachypodium distachyon]
comp22742_c0	1915	225429530	XP_002279085.1	485	226	1677	1	485	487	395	427	81.1088	2043	0	PREDICTED: UDP-sulfoquinovose synthase, chloroplastic [Vitis vinifera]
comp22773_c0	598	225442973	XP_002267834.1	137	211	345	88	132	45	28	34	62.2222	164	3.69e-12	PREDICTED: uncharacterized protein LOC100266397 [Vitis vinifera] >gi|297743452|emb|CBI36319.3| unnamed protein product [Vitis vinifera]
comp22797_c0	354	339433991	AEJ73229.1	305	52	240	4	66	63	49	56	77.7778	263	9.06e-26	CYC-like protein 1 [Akebia quinata]
comp22848_c0	708	225453899	XP_002278966.1	665	236	706	352	509	158	120	134	75.9494	608	4.37e-98	PREDICTED: protein transport Sec1a [Vitis vinifera]
comp22909_c0	1940	359483911	XP_002272288.2	512	213	1721	6	511	507	341	402	67.2584	1499	0	PREDICTED: uncharacterized protein LOC100251522 [Vitis vinifera] >gi|297740769|emb|CBI30951.3| unnamed protein product [Vitis vinifera]
comp22920_c0	665	225445310	XP_002281367.1	268	1	609	1	203	203	117	158	57.6355	676	6.1e-86	PREDICTED: sigma factor sigB regulation protein rsbQ [Vitis vinifera]
comp22935_c0	285	242060898	XP_002451738.1	291	1	114	254	291	38	29	34	76.3158	160	7.21e-12	hypothetical protein SORBIDRAFT_04g006950 [Sorghum bicolor] >gi|241931569|gb|EES04714.1| hypothetical protein SORBIDRAFT_04g006950 [Sorghum bicolor]
comp22951_c0	623	242094818	XP_002437899.1	200	164	484	80	200	125	65	76	52	271	1.76e-26	hypothetical protein SORBIDRAFT_10g004590 [Sorghum bicolor] >gi|241916122|gb|EER89266.1| hypothetical protein SORBIDRAFT_10g004590 [Sorghum bicolor]
comp22985_c0	979	115486791	NP_001068539.1	247	179	562	95	242	150	71	92	47.3333	256	3.85e-23	Os11g0703600 [Oryza sativa Japonica Group] >gi|62733232|gb|AAX95349.1| conserved hypothetical protein [Oryza sativa Japonica Group] >gi|77552699|gb|ABA95496.1| expressed protein [Oryza sativa Japonica Group] >gi|77552700|gb|ABA95497.1| expressed protein [Oryza sativa Japonica Group] >gi|113645761|dbj|BAF28902.1| Os11g0703600 [Oryza sativa Japonica Group] >gi|125535349|gb|EAY81897.1| hypothetical …
comp22992_c0	585	356577474	XP_003556850.1	161	20	193	2	59	58	32	41	55.1724	172	4.1e-13	PREDICTED: uncharacterized protein LOC100782632 [Glycine max]
comp23032_c0	262	294464782	ADE77897.1	396	2	259	148	233	86	43	56	50	219	6.65e-20	unknown [Picea sitchensis]
comp23040_c0	1829	226288349	EEH43861.1	609	50	1819	5	608	604	427	509	70.6954	2259	0	phosphate-repressible phosphate permease [Paracoccidioides brasiliensis Pb18]
comp23103_c0	273	255646163	ACU23567.1	278	93	272	218	277	60	36	45	60	190	2.99e-16	unknown [Glycine max]
comp23109_c0	2559	147785726	CAN68682.1	1248	1816	2286	275	440	169	60	88	35.503	165	1.39e-14	hypothetical protein VITISV_024814 [Vitis vinifera]
comp23123_c0	937	359491819	XP_002270576.2	247	108	872	9	247	255	193	217	75.6863	1026	1.13e-137	PREDICTED: NAC domain-containing protein 74 [Vitis vinifera]
comp23124_c0	315	357486187	XP_003613381.1	686	79	315	312	390	79	61	71	77.2152	350	5.78e-37	Lectin-domain containing receptor kinase A4.2 [Medicago truncatula] >gi|355514716|gb|AES96339.1| Lectin-domain containing receptor kinase A4.2 [Medicago truncatula]
comp23145_c0	276	225441813	XP_002283881.1	263	1	162	1	54	54	36	44	66.6667	201	8.94e-18	PREDICTED: 4,5-DOPA dioxygenase extradiol-like protein [Vitis vinifera] >gi|147811122|emb|CAN61349.1| hypothetical protein VITISV_021798 [Vitis vinifera] >gi|297739669|emb|CBI29851.3| unnamed protein product [Vitis vinifera]
comp23157_c0	507	326527457	BAK08003.1	227	71	388	1	112	112	67	85	59.8214	316	2.59e-33	predicted protein [Hordeum vulgare subsp. vulgare]
comp23180_c0	252	359485049	XP_002271984.2	477	3	251	196	276	83	47	63	56.6265	284	8.11e-29	PREDICTED: diacylglycerol kinase A-like [Vitis vinifera] >gi|297735318|emb|CBI17758.3| unnamed protein product [Vitis vinifera]
comp23186_c0	329	222635283	EEE65415.1	174	52	327	12	103	92	68	84	73.913	296	9.07e-32	hypothetical protein OsJ_20762 [Oryza sativa Japonica Group]
comp23230_c0	1809	361128882	EHL00807.1	449	242	1540	19	441	434	269	335	61.9816	1456	0	putative Beta-1,3-glucan-binding protein [Glarea lozoyensis 74030]
comp23253_c0	361	385718963	AFI71898.1	507	1	360	245	365	122	77	92	63.1148	358	2.58e-38	flavonoid 3'-hydroxylase [Paeonia lactiflora]
comp23258_c0	722	242089501	XP_002440583.1	99	206	508	1	99	101	31	48	30.6931	119	6.26e-06	hypothetical protein SORBIDRAFT_09g003485 [Sorghum bicolor] >gi|241945868|gb|EES19013.1| hypothetical protein SORBIDRAFT_09g003485 [Sorghum bicolor]
comp23262_c0	610	359494615	XP_002265801.2	634	1	189	208	270	63	53	58	84.127	294	6e-28	PREDICTED: protein kinase G11A-like [Vitis vinifera]
comp23293_c0	403	224172082	XP_002339604.1	81	101	349	1	81	83	64	76	77.1084	311	8.74e-35	predicted protein [Populus trichocarpa] >gi|222831865|gb|EEE70342.1| predicted protein [Populus trichocarpa]
comp23307_c0	699	224073917	XP_002304198.1	168	55	204	1	50	50	33	39	66	162	1.59e-11	predicted protein [Populus trichocarpa] >gi|222841630|gb|EEE79177.1| predicted protein [Populus trichocarpa]
comp23346_c0	273	297742187	CBI33974.3	1537	11	271	405	470	90	44	50	48.8889	156	1.27e-10	unnamed protein product [Vitis vinifera]
comp23348_c0	625	296082019	CBI21024.3	129	147	470	22	129	108	78	91	72.2222	446	2.68e-53	unnamed protein product [Vitis vinifera]
comp23352_c0	321	224058425	XP_002299503.1	541	68	319	458	539	84	64	70	76.1905	233	4.11e-21	predicted protein [Populus trichocarpa] >gi|222846761|gb|EEE84308.1| predicted protein [Populus trichocarpa]
comp23376_c0	337	2346978	BAA21923.1	166	26	199	90	151	62	33	42	53.2258	157	1.21e-11	ZPT2-14 [Petunia x hybrida]
comp23385_c0	952	302681509	XP_003030436.1	195	362	919	1	192	193	128	153	66.3212	481	3.06e-56	hypothetical protein SCHCODRAFT_77485 [Schizophyllum commune H4-8] >gi|300104127|gb|EFI95533.1| hypothetical protein SCHCODRAFT_77485 [Schizophyllum commune H4-8]
comp23544_c0	459	321264610	XP_003197022.1	132	63	410	17	132	116	107	113	92.2414	492	4.99e-61	component of the small (40S) ribosomal subunit; Rps26ap [Cryptococcus gattii WM276] >gi|317463500|gb|ADV25235.1| Component of the small (40S) ribosomal subunit, putative; Rps26ap [Cryptococcus gattii WM276]
comp23554_c0	250	225425015	XP_002267613.1	743	43	249	1	69	69	41	50	59.4203	219	2.48e-19	PREDICTED: putative pentatricopeptide repeat-containing protein At1g68930 [Vitis vinifera] >gi|297738214|emb|CBI27415.3| unnamed protein product [Vitis vinifera]
comp23562_c0	537	359490769	XP_003634164.1	329	107	442	24	135	112	86	95	76.7857	448	1.06e-51	PREDICTED: peroxidase 5-like isoform 1 [Vitis vinifera] >gi|300669658|sp|A7QEU4.2|PER5_VITVI RecName: Full=Peroxidase 5; Flags: Precursor
comp23616_c0	645	224056933	XP_002299096.1	791	66	644	568	759	194	113	150	58.2474	625	2.74e-73	predicted protein [Populus trichocarpa] >gi|222846354|gb|EEE83901.1| predicted protein [Populus trichocarpa]
comp23621_c0	1564	255554070	XP_002518075.1	356	239	1111	63	355	293	173	226	59.0444	898	1.11e-113	conserved hypothetical protein [Ricinus communis] >gi|223542671|gb|EEF44208.1| conserved hypothetical protein [Ricinus communis]
comp23679_c0	904	242093874	XP_002437427.1	256	95	502	6	153	160	73	95	45.625	326	6.37e-33	hypothetical protein SORBIDRAFT_10g026930 [Sorghum bicolor] >gi|241915650|gb|EER88794.1| hypothetical protein SORBIDRAFT_10g026930 [Sorghum bicolor]
comp23711_c0	505	225427108	XP_002277546.1	80	225	443	1	73	73	58	68	79.4521	311	2.54e-34	PREDICTED: dolichol phosphate-mannose biosynthesis regulatory protein [Vitis vinifera] >gi|297742040|emb|CBI33827.3| unnamed protein product [Vitis vinifera]
comp23734_c0	728	102139848	ABF70006.1	745	1	609	492	724	235	115	144	48.9362	399	1.25e-41	transport protein-related [Musa acuminata]
comp23746_c0	579	359487364	XP_002275730.2	158	107	454	43	158	116	85	97	73.2759	495	1.64e-60	PREDICTED: uncharacterized protein LOC100267061 [Vitis vinifera]
comp23818_c0	870	147785392	CAN68680.1	124	389	691	25	124	101	51	65	50.495	173	5.55e-13	hypothetical protein VITISV_041943 [Vitis vinifera]
comp23822_c0	690	225427631	XP_002269914.1	201	70	660	4	200	197	94	133	47.7157	455	2.04e-53	PREDICTED: uncharacterized protein LOC100252848 [Vitis vinifera]
comp23824_c0	731	225423605	XP_002275773.1	436	1	729	56	295	243	150	178	61.7284	633	6.19e-77	PREDICTED: protein UNUSUAL FLORAL ORGANS [Vitis vinifera]
comp23833_c0	528	226509543	NP_001147298.1	179	278	526	30	115	86	48	58	55.814	224	2.46e-20	transcriptional factor TINY [Zea mays] >gi|195609636|gb|ACG26648.1| transcriptional factor TINY [Zea mays]
comp23862_c0	604	340514990	EGR45247.1	321	24	602	40	250	218	86	108	39.4495	249	1.06e-22	cell wall protein [Trichoderma reesei QM6a]
comp23866_c0	659	255574452	XP_002528138.1	105	82	375	6	103	98	75	88	76.5306	323	4.3e-35	conserved hypothetical protein [Ricinus communis] >gi|223532436|gb|EEF34229.1| conserved hypothetical protein [Ricinus communis]
comp23877_c0	323	321251621	XP_003192124.1	129	80	322	48	128	81	76	77	93.8272	396	2.15e-47	ubiquitin-carboxy extension protein fusion [Cryptococcus gattii WM276] >gi|317458592|gb|ADV20337.1| Ubiquitin-carboxy extension protein fusion, putative [Cryptococcus gattii WM276]
comp23878_c0	1125	297738795	CBI28040.3	1154	6	1121	730	1103	374	241	311	64.4385	1343	1.31e-172	unnamed protein product [Vitis vinifera]
comp23980_c0	695	46409047	BAD16679.1	503	95	694	302	502	201	110	155	54.7264	592	2.22e-70	cytochrome P450 [Muscari armeniacum] >gi|46409049|dbj|BAD16680.1| cytochrome P450 [Muscari armeniacum]
comp24004_c0	263	326471806	EGD95815.1	706	2	259	2	87	86	77	81	89.5349	403	1.25e-44	elongation factor 3 [Trichophyton tonsurans CBS 112818]
comp24018_c0	683	225434337	XP_002276372.1	119	280	552	31	119	91	42	58	46.1538	201	3.34e-17	PREDICTED: non-specific lipid-transfer protein [Vitis vinifera] >gi|297745760|emb|CBI15816.3| unnamed protein product [Vitis vinifera]
comp24025_c0	494	224109000	XP_002315045.1	412	1	186	35	129	95	44	50	46.3158	196	1.47e-15	predicted protein [Populus trichocarpa] >gi|222864085|gb|EEF01216.1| predicted protein [Populus trichocarpa]
comp24050_c0	314	91806481	ABE65968.1	112	145	312	6	61	56	29	40	51.7857	156	5.62e-12	Skp1 family protein [Arabidopsis thaliana]
comp24074_c0	203	255552888	XP_002517487.1	357	1	201	261	326	67	43	52	64.1791	222	9.19e-21	aldose-1-epimerase, putative [Ricinus communis] >gi|223543498|gb|EEF45029.1| aldose-1-epimerase, putative [Ricinus communis]
comp24157_c0	846	218185747	EEC68174.1	961	5	664	740	960	221	178	203	80.543	948	1e-117	hypothetical protein OsI_36121 [Oryza sativa Indica Group]
comp24158_c0	363	224065537	XP_002301846.1	585	4	363	256	375	120	107	111	89.1667	593	1.57e-71	glycosyltransferase, CAZy family GT47 [Populus trichocarpa] >gi|222843572|gb|EEE81119.1| glycosyltransferase, CAZy family GT47 [Populus trichocarpa]
comp24160_c0	320	90399295	CAJ86215.1	762	2	319	181	293	113	64	85	56.6372	299	8.3e-30	H0323C08.7 [Oryza sativa Indica Group] >gi|116312067|emb|CAJ86431.1| H0303G06.20 [Oryza sativa Indica Group]
comp24202_c0	453	224087395	XP_002308149.1	77	236	373	1	46	46	45	46	97.8261	139	2.12e-09	predicted protein [Populus trichocarpa] >gi|222854125|gb|EEE91672.1| predicted protein [Populus trichocarpa]
comp24210_c0	588	357440319	XP_003590437.1	586	223	588	445	565	122	68	86	55.7377	349	7.23e-36	Uracil transporter-like protein [Medicago truncatula] >gi|355479485|gb|AES60688.1| Uracil transporter-like protein [Medicago truncatula]
comp24260_c0	1012	359490533	XP_002267793.2	364	5	625	98	340	246	96	129	39.0244	356	5.13e-36	PREDICTED: probable WRKY transcription factor 53-like [Vitis vinifera] >gi|302143686|emb|CBI22547.3| unnamed protein product [Vitis vinifera]
comp24263_c0	1126	297738590	CBI27835.3	644	232	1125	341	642	302	212	265	70.1987	1066	4.66e-137	unnamed protein product [Vitis vinifera]
comp24269_c0	617	359483522	XP_002273741.2	150	34	486	1	150	155	92	111	59.3548	437	8.51e-52	PREDICTED: uncharacterized protein LOC100266966 [Vitis vinifera]
comp24286_c0	223	154354073	ABS76146.1	389	1	222	136	209	74	54	64	72.973	301	1.44e-31	naringenin-chalcone synthase [Elaeis oleifera]
comp24338_c0	307	350539617	NP_001233966.1	325	44	307	49	139	91	72	79	79.1209	362	3.14e-40	TCP transcription factor 13 [Solanum lycopersicum] >gi|306416837|gb|ADM87262.1| TCP transcription factor 13 [Solanum lycopersicum]
comp24352_c0	2009	114053446	AAT40536.2	480	207	413	12	78	72	31	40	43.0556	134	9.78e-07	PttA2 protein, putative [Solanum demissum]
comp24410_c0	705	357128839	XP_003566077.1	510	13	315	122	221	101	53	64	52.4752	247	1.44e-21	PREDICTED: cyclin-A1-1-like [Brachypodium distachyon]
comp24446_c0	370	125489042	ABN42681.1	286	1	291	163	259	97	95	96	97.9381	513	1.02e-62	somatic embryogenesis receptor-like kinase [Coffea canephora]
comp24454_c0	309	307189894	EFN74138.1	92	13	288	1	92	92	67	81	72.8261	292	2.85e-32	60S ribosomal protein L37a [Camponotus floridanus]
comp24467_c0	474	255578310	XP_002530022.1	545	3	470	261	416	156	109	127	69.8718	588	1.41e-70	conserved hypothetical protein [Ricinus communis] >gi|223530501|gb|EEF32384.1| conserved hypothetical protein [Ricinus communis]
comp24477_c0	240	45935133	AAS79591.1	407	152	238	195	223	29	29	29	100	169	1.12e-14	putative dihydroflavonol reductase [Ipomoea trifida] >gi|117166022|dbj|BAF36324.1| hypothetical protein [Ipomoea trifida]
comp24501_c0	990	326534288	BAJ89494.1	947	3	239	494	573	81	53	59	65.4321	248	1.29e-20	predicted protein [Hordeum vulgare subsp. vulgare]
comp24514_c0	1897	359477939	XP_002265319.2	488	240	1550	21	488	482	254	316	52.6971	1027	1.35e-129	PREDICTED: heat stress transcription factor A-5-like [Vitis vinifera]
comp24556_c0	241	255568713	XP_002525328.1	402	19	222	20	87	68	45	59	66.1765	233	5.5e-22	sugar transporter, putative [Ricinus communis] >gi|223535387|gb|EEF37061.1| sugar transporter, putative [Ricinus communis]
comp24602_c0	720	171190270	ACB42441.1	278	2	592	82	278	197	170	181	86.2944	906	3.48e-120	aquaporin PIP2;4 [Gossypium hirsutum]
comp24605_c0	343	357165168	XP_003580292.1	475	1	330	98	207	110	68	90	61.8182	402	1.01e-44	PREDICTED: serine carboxypeptidase-like 19-like [Brachypodium distachyon]
comp24637_c0	580	224170097	XP_002339341.1	235	5	478	86	235	158	68	106	43.038	372	3.93e-41	predicted protein [Populus trichocarpa] >gi|222874899|gb|EEF12030.1| predicted protein [Populus trichocarpa]
comp24645_c0	745	357115996	XP_003559771.1	188	244	600	40	176	141	51	71	36.1702	210	1.18e-17	PREDICTED: putative RING-H2 finger protein ATL50-like [Brachypodium distachyon]
comp24646_c0	242	378727946	EHY54405.1	479	3	242	32	111	80	60	68	75	331	2.18e-35	acyl-CoA desaturase [Exophiala dermatitidis NIH/UT8656]
comp24667_c0	226	297803124	XP_002869446.1	497	2	226	51	123	75	68	72	90.6667	358	3.61e-39	ANAC075 [Arabidopsis lyrata subsp. lyrata] >gi|297315282|gb|EFH45705.1| ANAC075 [Arabidopsis lyrata subsp. lyrata]
comp24683_c0	857	58266210	XP_570261.1	1055	249	857	16	218	203	148	170	72.9064	592	8.19e-67	elongation factor 3 [Cryptococcus neoformans var. neoformans JEC21] >gi|134111046|ref|XP_775665.1| hypothetical protein CNBD3940 [Cryptococcus neoformans var. neoformans B-3501A] >gi|13442976|gb|AAK26245.1| elongation factor 3 [Cryptococcus neoformans var. neoformans] >gi|50258329|gb|EAL21018.1| hypothetical protein CNBD3940 [Cryptococcus neoformans var. neoformans B-3501A] >gi|57226494|gb|AAW429…
comp24683_c1	220	58266210	XP_570261.1	1055	1	219	213	285	73	70	71	95.8904	355	1.17e-37	elongation factor 3 [Cryptococcus neoformans var. neoformans JEC21] >gi|134111046|ref|XP_775665.1| hypothetical protein CNBD3940 [Cryptococcus neoformans var. neoformans B-3501A] >gi|13442976|gb|AAK26245.1| elongation factor 3 [Cryptococcus neoformans var. neoformans] >gi|50258329|gb|EAL21018.1| hypothetical protein CNBD3940 [Cryptococcus neoformans var. neoformans B-3501A] >gi|57226494|gb|AAW429…
comp24735_c0	1277	242094692	XP_002437836.1	664	4	891	384	662	303	88	147	29.0429	329	1.4e-30	hypothetical protein SORBIDRAFT_10g003430 [Sorghum bicolor] >gi|241916059|gb|EER89203.1| hypothetical protein SORBIDRAFT_10g003430 [Sorghum bicolor]
comp24738_c0	606	359491301	XP_002281438.2	563	59	487	365	547	186	83	99	44.6237	311	1.6e-30	PREDICTED: uncharacterized protein LOC100241686 [Vitis vinifera]
comp24746_c0	687	357160394	XP_003578750.1	215	80	577	20	215	197	88	122	44.6701	373	4.53e-41	PREDICTED: uncharacterized protein LOC100823520 [Brachypodium distachyon]
comp24757_c0	210	322698993	EFY90758.1	217	37	210	104	161	58	57	58	98.2759	294	1.01e-31	60S ribosomal protein L10A [Metarhizium acridum CQMa 102]
comp24781_c0	266	293332447	NP_001168974.1	272	1	159	17	69	53	39	46	73.5849	235	1.77e-22	uncharacterized protein LOC100382801 [Zea mays] >gi|223974193|gb|ACN31284.1| unknown [Zea mays]
comp24838_c0	767	225429512	XP_002278652.1	137	84	440	1	135	135	78	91	57.7778	316	3.37e-33	PREDICTED: glutaredoxin-C6 [Vitis vinifera] >gi|147866668|emb|CAN83675.1| hypothetical protein VITISV_003840 [Vitis vinifera]
comp24841_c0	204	224102881	XP_002312840.1	404	1	105	1	38	38	25	28	65.7895	125	4.17e-07	predicted protein [Populus trichocarpa] >gi|118482985|gb|ABK93404.1| unknown [Populus trichocarpa] >gi|222849248|gb|EEE86795.1| predicted protein [Populus trichocarpa]
comp24873_c0	732	351602050	AEQ53930.1	170	100	609	1	170	170	166	170	97.6471	896	2.91e-120	ferritin peptide [Fenneropenaeus indicus]
comp24918_c0	718	18423731	NP_568823.1	70	179	382	1	68	68	56	62	82.3529	298	1.2e-31	ATPase, V0 complex, subunit E [Arabidopsis thaliana] >gi|238481571|ref|NP_001154781.1| ATPase, V0 complex, subunit E [Arabidopsis thaliana] >gi|13926255|gb|AAK49600.1|AF372884_1 AT5g55290/MCO15_24 [Arabidopsis thaliana] >gi|9758126|dbj|BAB08598.1| unnamed protein product [Arabidopsis thaliana] >gi|16323226|gb|AAL15347.1| AT5g55290/MCO15_24 [Arabidopsis thaliana] >gi|227204441|dbj|BAH57072.1| AT5G…
comp24928_c0	540	356527993	XP_003532590.1	709	1	297	551	648	99	58	78	58.5859	349	1.25e-35	PREDICTED: L-type lectin-domain containing receptor kinase IX.1-like [Glycine max]
comp25010_c0	648	118484619	ABK94182.1	134	196	531	23	134	112	99	104	88.3929	409	1.18e-47	unknown [Populus trichocarpa]
comp25027_c0	742	224144232	XP_002325228.1	138	146	538	6	138	133	85	110	63.9098	434	6.47e-51	predicted protein [Populus trichocarpa] >gi|222866662|gb|EEF03793.1| predicted protein [Populus trichocarpa]
comp25031_c0	442	357506417	XP_003623497.1	130	3	203	63	127	67	28	44	41.791	137	8.05e-09	hypothetical protein MTR_7g071710 [Medicago truncatula] >gi|355498512|gb|AES79715.1| hypothetical protein MTR_7g071710 [Medicago truncatula]
comp25048_c0	540	255537876	XP_002510003.1	528	4	540	90	268	179	135	151	75.419	480	1.37e-54	multidrug resistance pump, putative [Ricinus communis] >gi|223550704|gb|EEF52190.1| multidrug resistance pump, putative [Ricinus communis]
comp25089_c0	727	224087361	XP_002308136.1	105	63	353	1	97	97	80	87	82.4742	427	2.17e-50	predicted protein [Populus trichocarpa] >gi|222854112|gb|EEE91659.1| predicted protein [Populus trichocarpa]
comp25115_c0	784	326502998	BAJ99124.1	172	251	667	1	158	159	71	89	44.6541	242	3.11e-22	predicted protein [Hordeum vulgare subsp. vulgare]
comp25116_c0	1954	255538764	XP_002510447.1	469	1	1137	60	432	386	172	247	44.5596	732	5.39e-86	bel1 homeotic protein, putative [Ricinus communis] >gi|223551148|gb|EEF52634.1| bel1 homeotic protein, putative [Ricinus communis]
comp25120_c0	593	321257390	XP_003193573.1	1055	2	592	280	476	197	171	181	86.802	913	2.9e-113	elongation factor 3 [Cryptococcus gattii WM276] >gi|317460043|gb|ADV21786.1| Elongation factor 3 [Cryptococcus gattii WM276]
comp25156_c0	274	147815651	CAN63836.1	815	2	274	577	667	91	68	83	74.7253	323	3.11e-33	hypothetical protein VITISV_036111 [Vitis vinifera]
comp25245_c0	1682	356560845	XP_003548697.1	600	1	813	203	488	291	83	123	28.5223	231	1.01e-17	PREDICTED: putative ribonuclease H protein At1g65750-like [Glycine max]
comp25245_c1	897	12323627	AAG51783.1	1142	1	720	874	1124	263	63	117	23.9544	141	3.1e-07	reverse transcriptase, putative; 16838-20266 [Arabidopsis thaliana]
comp25260_c0	359	15224950	NP_182002.1	202	3	242	42	121	80	60	72	75	337	1.67e-37	cyclin-U4-1 [Arabidopsis thaliana] >gi|75278850|sp|O80513.1|CCU41_ARATH RecName: Full=Cyclin-U4-1; Short=CycU4;1; AltName: Full=Cyclin-P4.1; Short=CycP4;1 >gi|3341694|gb|AAC27476.1| putative PREG1-like negative regulator [Arabidopsis thaliana] >gi|62867623|gb|AAY17415.1| At2g44740 [Arabidopsis thaliana] >gi|66841350|gb|AAY57312.1| At2g44740 [Arabidopsis thaliana] >gi|110738634|dbj|BAF01242.1| put…
comp25286_c0	703	255556015	XP_002519042.1	247	425	703	155	247	93	70	84	75.2688	421	9.9e-48	protein binding protein, putative [Ricinus communis] >gi|223541705|gb|EEF43253.1| protein binding protein, putative [Ricinus communis]
comp25293_c0	1598	359495083	XP_003634908.1	1280	7	1437	220	678	489	161	248	32.9243	541	1.94e-56	PREDICTED: putative disease resistance protein At3g14460-like [Vitis vinifera]
comp25316_c0	602	62733711	AAX95821.1	1273	80	400	782	885	108	46	66	42.5926	217	2.2e-17	transposon protein, putative, CACTA, En/Spm sub-class [Oryza sativa Japonica Group] >gi|77550346|gb|ABA93143.1| transposon protein, putative, CACTA, En/Spm sub-class [Oryza sativa Japonica Group]
comp25318_c0	1392	255545932	XP_002514026.1	437	172	1287	41	437	399	245	298	61.4035	1005	2.39e-129	Aspartic proteinase nepenthesin-1 precursor, putative [Ricinus communis] >gi|223547112|gb|EEF48609.1| Aspartic proteinase nepenthesin-1 precursor, putative [Ricinus communis]
comp25370_c0	204	359483306	XP_002265536.2	1116	3	203	495	561	67	34	46	50.7463	183	1.16e-14	PREDICTED: leucine-rich repeat receptor protein kinase EXS-like [Vitis vinifera]
comp25389_c0	227	147780470	CAN62551.1	467	1	225	285	367	83	45	60	54.2169	242	5.12e-23	hypothetical protein VITISV_002308 [Vitis vinifera]
comp25391_c0	267	225557649	EEH05935.1	533	187	267	499	525	27	27	27	100	169	1.31e-12	polyubiquitin [Ajellomyces capsulatus G186AR]
comp25397_c0	280	297601802	NP_001051520.2	77	1	153	1	51	51	45	49	88.2353	235	5e-24	Os03g0791500 [Oryza sativa Japonica Group] >gi|255674957|dbj|BAF13434.2| Os03g0791500 [Oryza sativa Japonica Group]
comp25402_c0	681	218195423	EEC77850.1	65	236	352	1	39	39	35	37	89.7436	172	1.07e-13	hypothetical protein OsI_17104 [Oryza sativa Indica Group] >gi|222629424|gb|EEE61556.1| hypothetical protein OsJ_15902 [Oryza sativa Japonica Group]
comp25451_c0	228	222636446	EEE66578.1	1079	1	225	325	398	75	37	52	49.3333	178	7.34e-14	hypothetical protein OsJ_23122 [Oryza sativa Japonica Group]
comp25475_c0	591	255543204	XP_002512665.1	347	109	567	33	200	168	103	115	61.3095	389	1.8e-42	conserved hypothetical protein [Ricinus communis] >gi|223548626|gb|EEF50117.1| conserved hypothetical protein [Ricinus communis]
comp25485_c0	267	242085542	XP_002443196.1	190	1	225	95	169	75	63	68	84	316	5.85e-35	hypothetical protein SORBIDRAFT_08g015030 [Sorghum bicolor] >gi|241943889|gb|EES17034.1| hypothetical protein SORBIDRAFT_08g015030 [Sorghum bicolor]
comp25488_c0	1303	255553023	XP_002517554.1	428	45	1226	15	424	420	227	295	54.0476	1034	3.17e-134	signal transducer, putative [Ricinus communis] >gi|223543186|gb|EEF44718.1| signal transducer, putative [Ricinus communis]
comp25511_c0	552	224137904	XP_002326469.1	514	1	375	133	275	144	80	99	55.5556	412	7.79e-45	predicted protein [Populus trichocarpa] >gi|222833791|gb|EEE72268.1| predicted protein [Populus trichocarpa]
comp25521_c0	961	225455380	XP_002277839.1	213	80	721	1	213	214	172	192	80.3738	907	5.82e-120	PREDICTED: calcineurin B-like protein 04 [Vitis vinifera] >gi|147835768|emb|CAN75197.1| hypothetical protein VITISV_002738 [Vitis vinifera] >gi|229609885|gb|ACQ83558.1| calcineurin B-like protein 04 [Vitis vinifera] >gi|302143903|emb|CBI23008.3| unnamed protein product [Vitis vinifera]
comp25553_c0	426	116791093	ABK25855.1	119	212	376	27	81	55	25	38	45.4545	144	8.2e-10	unknown [Picea sitchensis] >gi|148909738|gb|ABR17960.1| unknown [Picea sitchensis]
comp25576_c0	676	225464978	XP_002277045.1	347	305	676	63	205	143	63	82	44.0559	262	3.5e-24	PREDICTED: protein TRANSPARENT TESTA 1 [Vitis vinifera] >gi|147767982|emb|CAN64917.1| hypothetical protein VITISV_027337 [Vitis vinifera]
comp25584_c0	1477	225440081	XP_002282532.1	366	236	1300	1	366	366	256	304	69.9454	1209	1.17e-160	PREDICTED: dual specificity protein phosphatase 12 [Vitis vinifera] >gi|297741650|emb|CBI32782.3| unnamed protein product [Vitis vinifera]
comp25629_c0	605	297745339	CBI40419.3	279	32	397	137	253	123	84	94	68.2927	329	2.34e-34	unnamed protein product [Vitis vinifera]
comp25686_c0	533	226528433	NP_001150935.1	248	82	531	2	157	156	100	118	64.1026	467	1.74e-55	seed maturation protein [Zea mays] >gi|195643082|gb|ACG41009.1| seed maturation protein [Zea mays]
comp25709_c0	825	187372976	ACD03222.1	294	53	823	23	280	258	188	218	72.8682	1033	1.18e-138	xyloglucan endotransglucosylase/hydrolase 12 [Actinidia eriantha]
comp25713_c0	494	225448379	XP_002269271.1	143	119	412	44	143	100	66	77	66	309	6.42e-37	PREDICTED: pleckstrin homology domain-containing protein 1 [Vitis vinifera]
comp25738_c0	378	321251428	XP_003192061.1	113	43	366	1	108	108	103	107	95.3704	537	1.54e-68	60S ribosomal protein l30-1 (l32) [Cryptococcus gattii WM276] >gi|317458529|gb|ADV20274.1| 60S ribosomal protein l30-1 (l32), putative [Cryptococcus gattii WM276]
comp25777_c0	482	58268170	XP_571241.1	150	60	476	1	139	139	134	137	96.4029	549	2.23e-69	structural constituent of ribosome [Cryptococcus neoformans var. neoformans JEC21] >gi|134113392|ref|XP_774721.1| hypothetical protein CNBF4000 [Cryptococcus neoformans var. neoformans B-3501A] >gi|321260354|ref|XP_003194897.1| 40S ribosomal protein S14 [Cryptococcus gattii WM276] >gi|50257365|gb|EAL20074.1| hypothetical protein CNBF4000 [Cryptococcus neoformans var. neoformans B-3501A] >gi|57227…
comp25780_c0	839	388520665	AFK48394.1	313	304	513	231	300	70	43	54	61.4286	235	2.96e-20	unknown [Lotus japonicus]
comp25839_c0	269	125544010	EAY90149.1	90	2	175	31	89	59	39	46	66.1017	199	1.3e-18	hypothetical protein OsI_11714 [Oryza sativa Indica Group]
comp25857_c0	374	255569817	XP_002525872.1	198	183	374	4	66	64	32	43	50	147	3.39e-10	Miraculin precursor, putative [Ricinus communis] >gi|223534786|gb|EEF36476.1| Miraculin precursor, putative [Ricinus communis]
comp25954_c0	499	359491507	XP_003634286.1	518	1	291	371	466	97	55	72	56.701	283	3.23e-27	PREDICTED: wall-associated receptor kinase-like 8-like [Vitis vinifera]
comp25993_c0	271	356540820	XP_003538882.1	499	37	222	1	65	65	44	54	67.6923	234	1.48e-21	PREDICTED: uncharacterized protein LOC100808077 [Glycine max]
comp25996_c0	608	326502532	BAJ95329.1	181	289	435	21	76	56	34	39	60.7143	180	4.98e-14	predicted protein [Hordeum vulgare subsp. vulgare]
comp26002_c0	364	212721242	NP_001131439.1	230	57	356	1	100	100	79	91	79	425	2.99e-50	uncharacterized protein LOC100192771 [Zea mays] >gi|194691520|gb|ACF79844.1| unknown [Zea mays]
comp26050_c0	678	297737359	CBI26560.3	847	2	676	500	725	227	154	177	67.8414	799	8.47e-98	unnamed protein product [Vitis vinifera]
comp26084_c0	747	242043128	XP_002459435.1	76	86	232	1	49	49	41	43	83.6735	206	3.21e-18	hypothetical protein SORBIDRAFT_02g004620 [Sorghum bicolor] >gi|194691946|gb|ACF80057.1| unknown [Zea mays] >gi|195606182|gb|ACG24921.1| hypothetical protein [Zea mays] >gi|195636644|gb|ACG37790.1| hypothetical protein [Zea mays] >gi|195654621|gb|ACG46778.1| hypothetical protein [Zea mays] >gi|241922812|gb|EER95956.1| hypothetical protein SORBIDRAFT_02g004620 [Sorghum bicolor]
comp26099_c0	991	170094306	XP_001878374.1	516	529	801	80	167	91	34	52	37.3626	154	7.16e-09	predicted protein [Laccaria bicolor S238N-H82] >gi|164646828|gb|EDR11073.1| predicted protein [Laccaria bicolor S238N-H82]
comp26100_c0	345	225435092	XP_002284473.1	585	70	345	31	122	92	73	84	79.3478	394	3.42e-43	PREDICTED: laccase-17 [Vitis vinifera]
comp26106_c0	308	396477393	XP_003840256.1	316	1	306	96	197	102	97	100	95.098	440	7.23e-52	similar to ADP,ATP carrier protein [Leptosphaeria maculans JN3] >gi|312216828|emb|CBX96777.1| similar to ADP,ATP carrier protein [Leptosphaeria maculans JN3]
comp26108_c0	615	296089886	CBI39705.3	1345	2	256	572	660	93	47	63	50.5376	242	6.89e-37	unnamed protein product [Vitis vinifera]
comp26207_c0	2086	115473479	NP_001060338.1	450	1139	1867	61	304	244	229	239	93.8525	1249	1.36e-162	Os07g0626600 [Oryza sativa Japonica Group] >gi|75156289|sp|Q8LI34.1|MYST1_ORYSJ RecName: Full=Putative MYST-like histone acetyltransferase 1 >gi|22093781|dbj|BAC07072.1| putative histone acetyltransferase [Oryza sativa Japonica Group] >gi|113611874|dbj|BAF22252.1| Os07g0626600 [Oryza sativa Japonica Group]
comp26212_c0	990	31415939	AAP50960.1	279	145	942	2	267	266	202	235	75.9398	1120	3.7e-151	putative aurora-related kinase [Oryza sativa Japonica Group] >gi|67845867|dbj|BAE00023.1| Aurora kinase [Oryza sativa Japonica Group] >gi|108711241|gb|ABF99036.1| Serine/threonine-protein kinase 12, putative, expressed [Oryza sativa Japonica Group] >gi|218193807|gb|EEC76234.1| hypothetical protein OsI_13651 [Oryza sativa Indica Group] >gi|222625853|gb|EEE59985.1| hypothetical protein OsJ_12700 [O…
comp26220_c0	1053	388503124	AFK39628.1	315	29	937	1	315	316	197	237	62.3418	975	3.12e-128	unknown [Lotus japonicus]
comp26305_c0	1068	225442333	XP_002280889.1	273	81	893	1	273	277	175	211	63.1769	911	3.72e-119	PREDICTED: inorganic pyrophosphatase 2 [Vitis vinifera] >gi|297743107|emb|CBI35974.3| unnamed protein product [Vitis vinifera]
comp26318_c0	565	359476838	XP_002266706.2	358	5	280	266	358	100	52	62	52	140	3.65e-08	PREDICTED: NAC domain-containing protein 7-like [Vitis vinifera]
comp26320_c0	202	346425853	AEO27487.1	378	1	81	1	26	27	26	26	96.2963	136	1.16e-08	MIXTA-like transcription factor [Lotus japonicus]
comp26342_c0	228	117661805	ABK55669.1	150	1	228	20	95	76	74	74	97.3684	381	2.15e-45	chloroplast rubisco activase [Cucumis sativus]
comp26360_c0	743	170098482	XP_001880460.1	274	45	659	53	274	223	106	150	47.5336	469	2.17e-54	predicted protein [Laccaria bicolor S238N-H82] >gi|164644898|gb|EDR09147.1| predicted protein [Laccaria bicolor S238N-H82]
comp26394_c0	485	307136461	ADN34266.1	676	167	484	37	143	110	57	78	51.8182	184	9.87e-14	putative kinase [Cucumis melo subsp. melo]
comp26401_c0	591	142942394	ABO92969.1	285	3	155	40	95	56	35	42	62.5	192	2.39e-15	ZF-HD homeobox domain-containing protein [Solanum tuberosum]
comp26404_c0	589	357111143	XP_003557374.1	193	3	188	130	191	62	42	50	67.7419	225	4.31e-20	PREDICTED: probable calcium-binding protein CML45-like [Brachypodium distachyon]
comp26413_c0	340	222618545	EEE54677.1	511	26	157	74	117	44	30	30	68.1818	143	5.97e-09	hypothetical protein OsJ_01978 [Oryza sativa Japonica Group]
comp26413_c1	207	356575568	XP_003555911.1	410	81	206	2	43	42	28	32	66.6667	142	2.1e-09	PREDICTED: chaperone protein dnaJ 15-like [Glycine max]
comp26632_c0	813	58261722	XP_568271.1	234	132	767	1	212	212	148	172	69.8113	639	5.34e-80	hypothetical protein CNM02200 [Cryptococcus neoformans var. neoformans JEC21] >gi|134118551|ref|XP_772049.1| hypothetical protein CNBM2060 [Cryptococcus neoformans var. neoformans B-3501A] >gi|50254655|gb|EAL17402.1| hypothetical protein CNBM2060 [Cryptococcus neoformans var. neoformans B-3501A] >gi|57230444|gb|AAW46754.1| hypothetical protein CNM02200 [Cryptococcus neoformans var. neoformans JEC…
comp26636_c0	474	359484394	XP_002285029.2	720	2	373	289	402	124	67	86	54.0323	286	3.08e-27	PREDICTED: probable receptor-like protein kinase At5g20050 [Vitis vinifera]
comp26637_c0	903	125526462	EAY74576.1	321	95	721	31	319	290	74	104	25.5172	167	5.25e-11	hypothetical protein OsI_02464 [Oryza sativa Indica Group]
comp26647_c0	442	58432857	AAW78369.1	171	1	441	1	147	147	140	146	95.2381	758	5.89e-101	transcription factor AP2D14 [Oryza sativa Japonica Group]
comp26648_c0	1090	218196746	EEC79173.1	612	153	1058	286	589	304	107	168	35.1974	526	4.32e-58	hypothetical protein OsI_19859 [Oryza sativa Indica Group]
comp26680_c0	1868	147770516	CAN75682.1	401	552	1673	24	396	374	341	362	91.1765	1862	0	hypothetical protein VITISV_038955 [Vitis vinifera]
comp26751_c0	234	357966625	AET97457.1	712	57	179	1	41	41	32	37	78.0488	169	3.75e-16	delta1-pyrroline-5-carboxylate synthetase [Musa acuminata AAA Group]
comp26836_c0	308	255644977	ACU22988.1	251	2	151	194	243	50	32	41	64	174	5.7e-14	unknown [Glycine max]
comp26838_c0	1247	225432416	XP_002277762.1	429	325	1113	174	429	263	149	197	56.654	653	1.59e-77	PREDICTED: uncharacterized protein LOC100259554 [Vitis vinifera] >gi|297736929|emb|CBI26130.3| unnamed protein product [Vitis vinifera]
comp26865_c0	276	255569548	XP_002525740.1	294	127	258	103	146	44	31	38	70.4545	166	1.81e-14	NAC domain-containing protein, putative [Ricinus communis] >gi|223534954|gb|EEF36639.1| NAC domain-containing protein, putative [Ricinus communis]
comp26895_c0	467	242070791	XP_002450672.1	276	1	336	4	115	112	96	101	85.7143	523	7.1e-64	hypothetical protein SORBIDRAFT_05g009460 [Sorghum bicolor] >gi|241936515|gb|EES09660.1| hypothetical protein SORBIDRAFT_05g009460 [Sorghum bicolor]
comp26941_c0	227	297733786	CBI15033.3	3085	7	84	1754	1779	26	16	22	61.5385	96	2.12e-07	unnamed protein product [Vitis vinifera]
comp26958_c0	513	242084600	XP_002442725.1	92	96	335	1	78	80	52	62	65	280	1.9e-29	hypothetical protein SORBIDRAFT_08g001830 [Sorghum bicolor] >gi|241943418|gb|EES16563.1| hypothetical protein SORBIDRAFT_08g001830 [Sorghum bicolor]
comp26967_c0	757	255547892	XP_002515003.1	1464	178	753	107	319	214	90	130	42.0561	396	3.1e-40	multidrug resistance-associated protein 2, 6 (mrp2, 6), abc-transoprter, putative [Ricinus communis] >gi|223546054|gb|EEF47557.1| multidrug resistance-associated protein 2, 6 (mrp2, 6), abc-transoprter, putative [Ricinus communis]
comp27004_c0	377	357120977	XP_003562200.1	435	46	351	307	429	123	40	67	32.5203	179	1.34e-13	PREDICTED: CBL-interacting protein kinase 7-like [Brachypodium distachyon]
comp27031_c0	402	321265295	XP_003197364.1	129	3	386	2	129	128	111	124	86.7188	603	3.08e-78	protein component of the large (60S) ribosomal subunit; Rpl32p [Cryptococcus gattii WM276] >gi|317463843|gb|ADV25577.1| Protein component of the large (60S) ribosomal subunit, putative; Rpl32p [Cryptococcus gattii WM276]
comp27042_c0	216	125555775	EAZ01381.1	437	1	150	340	389	50	34	42	68	190	9.9e-23	hypothetical protein OsI_23414 [Oryza sativa Indica Group]
comp27107_c0	771	110739704	BAF01759.1	400	1	690	4	234	234	111	143	47.4359	537	6.14e-63	putative non-LTR retroelement reverse transcriptase [Arabidopsis thaliana]
comp27188_c0	661	225441401	XP_002275225.1	263	111	617	10	191	182	82	110	45.0549	173	1.34e-12	PREDICTED: coiled-coil domain-containing protein 75 [Vitis vinifera]
comp27189_c0	2058	359481908	XP_003632691.1	1346	2	2020	606	1286	682	475	559	69.6481	2418	0	PREDICTED: condensin complex subunit 1-like [Vitis vinifera]
comp27229_c0	530	21450866	AAK59628.2	215	2	439	71	215	147	102	116	69.3878	482	4.45e-58	putative dnaK-type molecular chaperone hsc70.1 protein [Arabidopsis thaliana]
comp27273_c0	1214	224139358	XP_002323073.1	186	418	897	1	156	160	118	125	73.75	522	2.08e-61	predicted protein [Populus trichocarpa] >gi|222867703|gb|EEF04834.1| predicted protein [Populus trichocarpa]
comp27278_c0	202	397530419	AFO53697.1	169	92	202	133	169	37	29	34	78.3784	175	9.2e-15	fruit ripening and abscission polygalacturonase, partial [Elaeis guineensis]
comp27279_c0	604	330318556	AEC10950.1	151	109	444	30	146	117	90	100	76.9231	337	8.3e-37	histone H2A [Camellia sinensis]
comp27297_c0	492	302142621	CBI19824.3	396	2	487	187	339	162	65	93	40.1235	282	1.78e-27	unnamed protein product [Vitis vinifera]
comp27311_c0	1277	297735490	CBI17930.3	286	308	1048	43	286	249	167	192	67.0683	866	4.42e-111	unnamed protein product [Vitis vinifera]
comp27316_c0	620	357482775	XP_003611674.1	250	122	439	143	250	109	57	65	52.2936	254	1.05e-23	Proteasome subunit alpha type [Medicago truncatula] >gi|355513009|gb|AES94632.1| Proteasome subunit alpha type [Medicago truncatula]
comp27341_c0	383	147794797	CAN62586.1	140	1	147	92	140	49	47	49	95.9184	256	5.41e-26	hypothetical protein VITISV_000776 [Vitis vinifera]
comp27344_c0	517	392580452	EIW73579.1	1059	2	430	916	1059	144	127	136	88.1944	538	5.2e-61	hypothetical protein TREMEDRAFT_70996 [Tremella mesenterica DSM 1558]
comp27378_c0	554	125524935	EAY73049.1	123	169	435	28	117	90	42	61	46.6667	223	1.43e-20	hypothetical protein OsI_00923 [Oryza sativa Indica Group] >gi|125569546|gb|EAZ11061.1| hypothetical protein OsJ_00904 [Oryza sativa Japonica Group]
comp27387_c0	679	326531234	BAK04968.1	565	158	679	41	214	174	114	140	65.5172	628	4.2e-75	predicted protein [Hordeum vulgare subsp. vulgare]
comp27392_c0	743	222615641	EEE51773.1	378	87	395	192	291	103	38	58	36.8932	131	1.53e-06	hypothetical protein OsJ_33218 [Oryza sativa Japonica Group]
comp27404_c0	331	357111174	XP_003557389.1	48	129	272	1	48	48	29	37	60.4167	153	6.82e-12	PREDICTED: uncharacterized protein LOC100831464 [Brachypodium distachyon]
comp27408_c0	464	242046060	XP_002460901.1	430	3	464	254	406	154	132	144	85.7143	709	7.25e-90	hypothetical protein SORBIDRAFT_02g037130 [Sorghum bicolor] >gi|241924278|gb|EER97422.1| hypothetical protein SORBIDRAFT_02g037130 [Sorghum bicolor]
comp27431_c0	298	242054325	XP_002456308.1	464	1	171	406	462	57	33	41	57.8947	175	2.03e-13	hypothetical protein SORBIDRAFT_03g033810 [Sorghum bicolor] >gi|241928283|gb|EES01428.1| hypothetical protein SORBIDRAFT_03g033810 [Sorghum bicolor]
comp27435_c0	305	62321451	BAD94852.1	131	1	81	44	70	27	23	23	85.1852	112	6.74e-06	mitochondrial phosphate translocator [Arabidopsis thaliana]
comp27438_c0	476	58259629	XP_567227.1	93	54	314	8	93	88	43	59	48.8636	183	1.87e-15	hypothetical protein [Cryptococcus neoformans var. neoformans JEC21] >gi|134106241|ref|XP_778131.1| hypothetical protein CNBA1330 [Cryptococcus neoformans var. neoformans B-3501A] >gi|50260834|gb|EAL23484.1| hypothetical protein CNBA1330 [Cryptococcus neoformans var. neoformans B-3501A] >gi|57223364|gb|AAW41408.1| expressed protein [Cryptococcus neoformans var. neoformans JEC21]
comp27454_c0	513	164604830	BAF98467.1	503	6	512	335	492	169	96	121	56.8047	499	1.35e-57	cytochrome P450 [Coptis japonica var. dissecta]
comp27477_c0	707	224142101	XP_002324397.1	954	3	626	5	212	208	187	199	89.9038	783	1.31e-94	predicted protein [Populus trichocarpa] >gi|222865831|gb|EEF02962.1| predicted protein [Populus trichocarpa]
comp27480_c0	1159	115459654	NP_001053427.1	276	99	893	10	276	268	140	196	52.2388	670	2.21e-82	Os04g0537800 [Oryza sativa Japonica Group] >gi|113564998|dbj|BAF15341.1| Os04g0537800 [Oryza sativa Japonica Group] >gi|215737261|dbj|BAG96190.1| unnamed protein product [Oryza sativa Japonica Group]
comp27482_c0	331	398408351	XP_003855641.1	97	27	317	1	97	97	81	91	83.5052	324	5.74e-37	40S ribosomal protein S20 [Mycosphaerella graminicola IPO323] >gi|339475525|gb|EGP90617.1| hypothetical protein MYCGRDRAFT_103162 [Mycosphaerella graminicola IPO323]
comp27495_c0	685	218190160	EEC72587.1	315	1	429	158	299	147	114	129	77.551	485	1.65e-56	hypothetical protein OsI_06041 [Oryza sativa Indica Group]
comp27507_c0	409	336274825	XP_003352166.1	71	2	199	6	71	66	48	56	72.7273	234	2.7e-23	glucose-repressible gene protein [Sordaria macrospora k-hell] >gi|380092246|emb|CCC10022.1| putative GRG-1 glucose-repressible gene-1 protein [Sordaria macrospora k-hell]
comp27516_c0	2105	222640579	EEE68711.1	854	662	2104	371	846	481	265	337	55.0936	1221	6.51e-153	hypothetical protein OsJ_27368 [Oryza sativa Japonica Group]
comp27633_c0	331	58271356	XP_572834.1	673	5	328	316	423	108	93	103	86.1111	517	3.25e-60	polyadenylate-binding protein [Cryptococcus neoformans var. neoformans JEC21] >gi|134114714|ref|XP_774065.1| hypothetical protein CNBH1100 [Cryptococcus neoformans var. neoformans B-3501A] >gi|338819167|sp|P0CP47.1|PABP_CRYNB RecName: Full=Polyadenylate-binding protein, cytoplasmic and nuclear; Short=PABP; Short=Poly(A)-binding protein; AltName: Full=Polyadenylate tail-binding protein >gi|3388191…
comp27636_c0	2300	125524951	EAY73065.1	524	1149	2285	33	409	379	303	339	79.9472	1505	0	hypothetical protein OsI_00940 [Oryza sativa Indica Group]
comp27644_c0	343	224117732	XP_002317654.1	1007	248	343	629	660	32	25	28	78.125	127	1.09e-06	predicted protein [Populus trichocarpa] >gi|222860719|gb|EEE98266.1| predicted protein [Populus trichocarpa]
comp27651_c0	819	357465663	XP_003603116.1	434	397	663	36	90	89	39	49	43.8202	173	1.03e-11	hypothetical protein MTR_3g104070 [Medicago truncatula] >gi|355492164|gb|AES73367.1| hypothetical protein MTR_3g104070 [Medicago truncatula]
comp27653_c0	617	115445661	NP_001046610.1	763	2	613	121	350	234	93	133	39.7436	341	5.54e-34	Os02g0297200 [Oryza sativa Japonica Group] >gi|47847894|dbj|BAD21686.1| unknown protein [Oryza sativa Japonica Group] >gi|113536141|dbj|BAF08524.1| Os02g0297200 [Oryza sativa Japonica Group] >gi|125581752|gb|EAZ22683.1| hypothetical protein OsJ_06352 [Oryza sativa Japonica Group]
comp27653_c1	916	357140054	XP_003571587.1	712	1	903	308	630	328	103	165	31.4024	386	3.89e-39	PREDICTED: uncharacterized protein LOC100829005 [Brachypodium distachyon]
comp27654_c0	293	224142143	XP_002324418.1	176	94	207	139	176	38	26	33	68.4211	147	1.68e-10	predicted protein [Populus trichocarpa] >gi|222865852|gb|EEF02983.1| predicted protein [Populus trichocarpa]
comp27654_c1	268	357136286	XP_003569736.1	247	46	267	76	122	74	39	41	52.7027	175	3.08e-14	PREDICTED: heat stress transcription factor C-1b-like [Brachypodium distachyon]
comp27664_c0	245	224111386	XP_002315835.1	584	3	176	1	57	58	34	42	58.6207	176	1.32e-13	predicted protein [Populus trichocarpa] >gi|222864875|gb|EEF02006.1| predicted protein [Populus trichocarpa]
comp27669_c0	366	378726445	EHY52904.1	496	3	323	1	107	107	92	97	85.9813	491	2.08e-57	aldehyde dehydrogenase [Exophiala dermatitidis NIH/UT8656]
comp27674_c0	247	156059470	XP_001595658.1	596	1	246	173	254	82	70	75	85.3659	366	5.51e-40	hypothetical protein SS1G_03747 [Sclerotinia sclerotiorum 1980] >gi|154701534|gb|EDO01273.1| hypothetical protein SS1G_03747 [Sclerotinia sclerotiorum 1980 UF-70]
comp27678_c0	209	115398299	XP_001214741.1	460	2	208	56	124	69	64	66	92.7536	315	2.07e-33	NADP-specific glutamate dehydrogenase [Aspergillus terreus NIH2624] >gi|114192932|gb|EAU34632.1| NADP-specific glutamate dehydrogenase [Aspergillus terreus NIH2624]
comp27680_c0	386	357519461	XP_003630019.1	1171	250	384	767	810	45	35	40	77.7778	188	1.83e-14	DNA damage-binding protein [Medicago truncatula] >gi|355524041|gb|AET04495.1| DNA damage-binding protein [Medicago truncatula]
comp27696_c0	446	297837707	XP_002886735.1	649	48	371	5	110	108	59	79	54.6296	289	6.49e-28	hypothetical protein ARALYDRAFT_315436 [Arabidopsis lyrata subsp. lyrata] >gi|297332576|gb|EFH62994.1| hypothetical protein ARALYDRAFT_315436 [Arabidopsis lyrata subsp. lyrata]
comp27702_c0	304	388495340	AFK35736.1	138	1	303	31	133	103	53	71	51.4563	242	2.31e-24	unknown [Lotus japonicus]
comp27716_c0	2152	302142573	CBI19776.3	509	570	1223	283	506	224	168	191	75	769	2.3e-177	unnamed protein product [Vitis vinifera]
comp27718_c0	368	326501020	BAJ98741.1	347	147	368	271	347	77	40	56	51.9481	205	1.07e-17	predicted protein [Hordeum vulgare subsp. vulgare]
comp27721_c0	660	297746133	CBI16189.3	235	85	630	30	228	204	93	124	45.5882	412	1.15e-46	unnamed protein product [Vitis vinifera]
comp27730_c0	745	225441742	XP_002283156.1	172	63	575	2	172	171	133	152	77.7778	668	1.49e-85	PREDICTED: uncharacterized protein LOC100245318 [Vitis vinifera] >gi|297739700|emb|CBI29882.3| unnamed protein product [Vitis vinifera]
comp27754_c0	834	147778995	CAN75752.1	570	300	794	371	543	182	60	90	32.967	181	1.12e-12	hypothetical protein VITISV_030813 [Vitis vinifera]
comp27777_c0	611	58268686	XP_571499.1	147	68	529	1	147	155	123	133	79.3548	582	1.36e-73	40s ribosomal protein s10 [Cryptococcus neoformans var. neoformans JEC21] >gi|134113202|ref|XP_774626.1| hypothetical protein CNBF3060 [Cryptococcus neoformans var. neoformans B-3501A] >gi|50257270|gb|EAL19979.1| hypothetical protein CNBF3060 [Cryptococcus neoformans var. neoformans B-3501A] >gi|57227734|gb|AAW44192.1| 40s ribosomal protein s10, putative [Cryptococcus neoformans var. neoformans J…
comp27779_c1	316	359359133	AEV41039.1	147	1	315	25	136	112	68	87	60.7143	336	3.23e-38	hypothetical protein [Oryza minuta]
comp27803_c0	219	85110027	XP_963201.1	313	1	219	114	186	73	67	70	91.7808	299	1.13e-31	ADP,ATP carrier protein [Neurospora crassa OR74A] >gi|113466|sp|P02723.1|ADT_NEUCR RecName: Full=ADP,ATP carrier protein; AltName: Full=ADP/ATP translocase; AltName: Full=Adenine nucleotide translocator; Short=ANT >gi|2977|emb|CAA25104.1| ADP/ATP carrier protein [Neurospora crassa] >gi|28924870|gb|EAA33965.1| ADP,ATP carrier protein [Neurospora crassa OR74A] >gi|38524276|emb|CAE75740.1| ADP, ATP …
comp27808_c0	428	218192649	EEC75076.1	905	20	400	96	229	136	71	88	52.2059	317	1.55e-31	hypothetical protein OsI_11209 [Oryza sativa Indica Group]
comp27809_c0	443	295913407	ADG57956.1	195	183	443	10	96	87	81	84	93.1034	343	5.12e-38	transcription factor [Lycoris longituba]
comp27825_c0	565	297797761	XP_002866765.1	100	85	294	29	99	73	31	47	42.4658	154	3.74e-11	hypothetical protein ARALYDRAFT_920105 [Arabidopsis lyrata subsp. lyrata] >gi|297312600|gb|EFH43024.1| hypothetical protein ARALYDRAFT_920105 [Arabidopsis lyrata subsp. lyrata]
comp27853_c0	1414	356507258	XP_003522386.1	348	171	1220	1	348	352	202	253	57.3864	1021	7.18e-133	PREDICTED: uncharacterized protein LOC100799543 [Glycine max]
comp27856_c0	583	346469735	AEO34712.1	222	274	582	120	222	103	93	99	90.2913	497	4.82e-60	hypothetical protein [Amblyomma maculatum]
comp27876_c0	540	359324437	EHK62697.1	330	6	539	95	272	178	83	115	46.6292	424	5.22e-48	hypothetical protein M3S_J81, partial [Sorghum bicolor]
comp27888_c0	1353	115447863	NP_001047711.1	488	29	1213	67	446	395	210	268	53.1646	992	7.15e-127	Os02g0673100 [Oryza sativa Japonica Group] >gi|50251239|dbj|BAD27825.1| aluminum-activated malate transporter-like [Oryza sativa Japonica Group] >gi|50253199|dbj|BAD29455.1| aluminum-activated malate transporter-like [Oryza sativa Japonica Group] >gi|113537242|dbj|BAF09625.1| Os02g0673100 [Oryza sativa Japonica Group] >gi|215766343|dbj|BAG98571.1| unnamed protein product [Oryza sativa Japonica Gr…
comp27900_c0	1010	297735546	CBI18040.3	277	259	888	37	234	214	50	87	23.3645	132	2.48e-06	unnamed protein product [Vitis vinifera]
comp27908_c0	800	255574413	XP_002528120.1	468	144	800	118	337	220	139	178	63.1818	785	5.69e-99	ATP binding protein, putative [Ricinus communis] >gi|223532509|gb|EEF34299.1| ATP binding protein, putative [Ricinus communis]
comp27912_c0	919	296083236	CBI22872.3	302	169	918	18	266	250	151	190	60.4	801	5.82e-103	unnamed protein product [Vitis vinifera]
comp27913_c0	686	123556	P27880.1	158	2	241	79	158	80	64	74	80	342	3.26e-37	RecName: Full=18.2 kDa class I heat shock protein >gi|19618|emb|CAA41547.1| heat shock protein [Medicago sativa]
comp27915_c0	363	147845933	CAN79904.1	279	1	363	34	154	121	66	84	54.5455	383	1.82e-43	hypothetical protein VITISV_022121 [Vitis vinifera]
comp27926_c0	2239	225428076	XP_002278006.1	720	44	2110	1	713	727	379	493	52.132	1640	0	PREDICTED: uncharacterized protein LOC100243514 [Vitis vinifera]
comp27928_c0	227	356573095	XP_003554700.1	346	1	126	2	43	42	32	36	76.1905	170	2.37e-13	PREDICTED: LOW QUALITY PROTEIN: auxin-induced protein PCNT115-like [Glycine max]
comp27929_c0	511	296086416	CBI32005.3	191	218	346	64	106	43	36	37	83.7209	200	1.21e-25	unnamed protein product [Vitis vinifera]
comp27947_c0	411	58258973	XP_566899.1	563	2	205	44	111	68	55	62	80.8824	290	1.95e-28	amino acid transporter [Cryptococcus neoformans var. neoformans JEC21] >gi|134107103|ref|XP_777864.1| hypothetical protein CNBA5610 [Cryptococcus neoformans var. neoformans B-3501A] >gi|50260562|gb|EAL23217.1| hypothetical protein CNBA5610 [Cryptococcus neoformans var. neoformans B-3501A] >gi|57223036|gb|AAW41080.1| amino acid transporter, putative [Cryptococcus neoformans var. neoformans JEC21]
comp27948_c0	255	147769222	CAN71856.1	397	4	255	167	252	86	28	48	32.5581	125	7.08e-07	hypothetical protein VITISV_012967 [Vitis vinifera]
comp27960_c0	826	225439631	XP_002268948.1	208	473	787	1	103	105	63	80	60	269	1.68e-25	PREDICTED: uncharacterized protein LOC100253378 [Vitis vinifera]
comp27969_c0	205	357115222	XP_003559390.1	306	2	76	282	306	25	22	23	88	142	1.21e-09	PREDICTED: pentatricopeptide repeat-containing protein At4g14050, mitochondrial-like [Brachypodium distachyon]
comp27974_c0	491	357121032	XP_003562226.1	538	43	156	18	69	52	27	32	51.9231	128	1.17e-06	PREDICTED: F-box/LRR-repeat protein 17-like isoform 2 [Brachypodium distachyon]
comp27976_c0	735	297738795	CBI28040.3	1154	15	734	494	733	240	154	197	64.1667	759	3.52e-90	unnamed protein product [Vitis vinifera]
comp27995_c0	430	17385979	AAL38534.1	182	1	378	34	159	126	116	121	92.0635	631	1.37e-81	CSLD2 [Oryza sativa]
comp27997_c0	1514	224141279	XP_002324002.1	726	1	621	338	545	208	176	193	84.6154	876	4.61e-106	predicted protein [Populus trichocarpa] >gi|222867004|gb|EEF04135.1| predicted protein [Populus trichocarpa]
comp28005_c0	230	242802648	XP_002484013.1	203	21	230	1	70	70	69	69	98.5714	354	1.1e-40	60S ribosomal protein L15 [Talaromyces stipitatus ATCC 10500] >gi|218717358|gb|EED16779.1| 60S ribosomal protein L15 [Talaromyces stipitatus ATCC 10500]
comp28013_c0	350	4836930	AAD30632.1	1295	1	345	867	967	115	56	72	48.6957	268	4.2e-25	Hypothetical protein [Arabidopsis thaliana]
comp28042_c0	715	242038125	XP_002466457.1	474	1	714	28	275	248	190	211	76.6129	933	1.74e-121	hypothetical protein SORBIDRAFT_01g008060 [Sorghum bicolor] >gi|241920311|gb|EER93455.1| hypothetical protein SORBIDRAFT_01g008060 [Sorghum bicolor]
comp28047_c0	250	356572276	XP_003554295.1	744	57	173	8	46	39	20	27	51.2821	126	6.94e-07	PREDICTED: long-chain-alcohol oxidase FAO2-like [Glycine max]
comp28051_c0	848	225431545	XP_002275533.1	1309	3	737	318	556	247	151	173	61.1336	724	1.97e-84	PREDICTED: protein TONSOKU-like [Vitis vinifera]
comp28065_c0	706	225425114	XP_002273186.1	1020	2	508	852	1018	169	131	156	77.5148	727	3.2e-86	PREDICTED: phytosulfokine receptor 1 [Vitis vinifera]
comp28065_c1	737	225425114	XP_002273186.1	1020	2	736	604	855	252	162	191	64.2857	714	2.64e-84	PREDICTED: phytosulfokine receptor 1 [Vitis vinifera]
comp28068_c0	496	15242200	NP_197620.1	108	114	398	1	94	95	53	68	55.7895	240	2.05e-23	uncharacterized protein [Arabidopsis thaliana] >gi|9757808|dbj|BAB08326.1| unnamed protein product [Arabidopsis thaliana] >gi|17065494|gb|AAL32901.1| Unknown protein [Arabidopsis thaliana] >gi|21595092|gb|AAM66072.1| unknown [Arabidopsis thaliana] >gi|30102802|gb|AAP21319.1| At5g22280 [Arabidopsis thaliana] >gi|332005621|gb|AED93004.1| uncharacterized protein [Arabidopsis thaliana]
comp28069_c0	441	377655441	AFB73911.1	1309	6	341	744	855	112	81	92	72.3214	445	1.97e-48	polyprotein [Citrus sinensis]
comp28074_c0	1950	87116461	BAE79383.1	532	281	826	103	280	182	65	98	35.7143	322	3.9e-29	unnamed protein product [Ipomoea batatas]
comp28081_c0	785	392580099	EIW73226.1	400	25	783	24	276	253	236	246	93.2806	1172	2.78e-158	hypothetical protein TREMEDRAFT_37234 [Tremella mesenterica DSM 1558]
comp28086_c0	392	297735370	CBI17810.3	178	2	391	26	123	130	68	85	52.3077	331	1.1e-36	unnamed protein product [Vitis vinifera]
comp28095_c0	464	357137529	XP_003570353.1	228	2	238	150	228	79	61	70	77.2152	308	2.12e-32	PREDICTED: vesicle-associated membrane protein 713-like [Brachypodium distachyon]
comp28099_c0	238	153946683	ABS53280.1	173	2	238	30	108	79	64	71	81.0127	350	2.38e-40	S-locus lectin protein kinase family protein [Arabidopsis lyrata subsp. lyrata] >gi|153946685|gb|ABS53281.1| S-locus lectin protein kinase family protein [Arabidopsis lyrata subsp. lyrata] >gi|153946690|gb|ABS53283.1| S-locus lectin protein kinase family protein [Arabidopsis lyrata subsp. lyrata] >gi|153946692|gb|ABS53284.1| S-locus lectin protein kinase family protein [Arabidopsis lyrata subsp. …
comp28113_c0	217	340519079	EGR49318.1	154	3	215	54	124	71	62	68	87.3239	347	2.21e-40	predicted protein [Trichoderma reesei QM6a]
comp28113_c1	271	398393958	XP_003850438.1	153	2	145	106	153	48	43	46	89.5833	235	2.67e-23	hypothetical protein MYCGRDRAFT_95071 [Mycosphaerella graminicola IPO323] >gi|339470316|gb|EGP85414.1| hypothetical protein MYCGRDRAFT_95071 [Mycosphaerella graminicola IPO323]
comp28114_c0	278	326496459	BAJ94691.1	598	2	157	276	326	52	23	35	44.2308	125	1.02e-06	predicted protein [Hordeum vulgare subsp. vulgare]
comp28121_c0	517	58264576	XP_569444.1	599	1	513	366	536	171	144	154	84.2105	634	1.25e-76	monosaccharide transporter [Cryptococcus neoformans var. neoformans JEC21] >gi|57225676|gb|AAW42137.1| monosaccharide transporter, putative [Cryptococcus neoformans var. neoformans JEC21]
comp28122_c0	728	242073698	XP_002446785.1	141	233	541	32	134	103	80	91	77.6699	424	2.21e-49	hypothetical protein SORBIDRAFT_06g022590 [Sorghum bicolor] >gi|241937968|gb|EES11113.1| hypothetical protein SORBIDRAFT_06g022590 [Sorghum bicolor]
comp28129_c0	1444	242059887	XP_002459089.1	1331	5	1444	560	1039	484	309	376	63.843	1475	0	hypothetical protein SORBIDRAFT_03g045640 [Sorghum bicolor] >gi|241931064|gb|EES04209.1| hypothetical protein SORBIDRAFT_03g045640 [Sorghum bicolor]
comp28131_c0	569	359475987	XP_002280293.2	1648	1	561	1098	1284	187	129	145	68.984	616	1.26e-70	PREDICTED: endoribonuclease Dicer homolog 3a-like [Vitis vinifera]
comp28143_c0	320	224097748	XP_002311065.1	1032	2	310	919	1029	112	42	72	37.5	228	4.93e-20	predicted protein [Populus trichocarpa] >gi|222850885|gb|EEE88432.1| predicted protein [Populus trichocarpa]
comp28148_c0	1304	359474850	XP_002277741.2	648	127	1299	251	641	392	192	273	48.9796	940	2.91e-117	PREDICTED: pentatricopeptide repeat-containing protein At4g13650-like [Vitis vinifera] >gi|297744624|emb|CBI37886.3| unnamed protein product [Vitis vinifera]
comp28153_c0	345	321261323	XP_003195381.1	111	8	331	1	108	108	92	100	85.1852	353	4.49e-41	structural constituent of ribosome [Cryptococcus gattii WM276] >gi|317461854|gb|ADV23594.1| Structural constituent of ribosome, putative [Cryptococcus gattii WM276]
comp28160_c0	443	219363119	NP_001136798.1	382	21	377	257	382	127	70	95	55.1181	343	2.6e-36	uncharacterized protein LOC100216943 [Zea mays] >gi|194697146|gb|ACF82657.1| unknown [Zea mays]
comp28167_c0	483	226503593	NP_001149546.1	336	100	477	207	331	127	94	109	74.0157	458	2.41e-53	protein Mo25 [Zea mays] >gi|195627922|gb|ACG35791.1| protein Mo25 [Zea mays]
comp28180_c0	318	115433342	XP_001216808.1	71	56	268	1	71	71	57	68	80.2817	294	7.74e-33	conserved hypothetical protein [Aspergillus terreus NIH2624] >gi|114189660|gb|EAU31360.1| conserved hypothetical protein [Aspergillus terreus NIH2624]
comp28183_c0	745	297789990	XP_002862912.1	302	2	568	110	299	190	114	150	60	596	5.74e-73	hypothetical protein ARALYDRAFT_359293 [Arabidopsis lyrata subsp. lyrata] >gi|297308682|gb|EFH39171.1| hypothetical protein ARALYDRAFT_359293 [Arabidopsis lyrata subsp. lyrata]
comp28189_c0	561	224128930	XP_002320456.1	186	394	531	13	58	46	22	32	47.8261	140	1.01e-08	predicted protein [Populus trichocarpa] >gi|222861229|gb|EEE98771.1| predicted protein [Populus trichocarpa]
comp28200_c0	710	359486474	XP_003633449.1	268	171	578	112	268	159	86	103	54.0881	396	8.69e-44	PREDICTED: uncharacterized protein LOC100853125 [Vitis vinifera]
comp28206_c0	886	359480321	XP_003632432.1	610	1	537	402	580	179	156	166	87.1508	856	2.16e-107	PREDICTED: xyloglucan galactosyltransferase KATAMARI1-like [Vitis vinifera]
comp28207_c0	1463	225452159	XP_002263731.1	424	57	1319	1	422	422	300	355	71.09	1602	0	PREDICTED: COP9 signalosome complex subunit 3 [Vitis vinifera] >gi|296090247|emb|CBI40066.3| unnamed protein product [Vitis vinifera]
comp28210_c0	1528	297740426	CBI30608.3	247	588	1268	1	217	228	84	126	36.8421	300	2.12e-28	unnamed protein product [Vitis vinifera]
comp28214_c0	313	359481709	XP_002283549.2	526	1	312	117	220	104	100	102	96.1538	543	4.51e-65	PREDICTED: calcium-dependent protein kinase 32-like isoform 1 [Vitis vinifera]
comp28214_c1	593	359481709	XP_002283549.2	526	218	592	1	123	125	94	107	75.2	469	1.09e-52	PREDICTED: calcium-dependent protein kinase 32-like isoform 1 [Vitis vinifera]
comp28215_c0	1431	359495915	XP_002273532.2	774	1	1197	29	432	404	346	371	85.6436	1787	0	PREDICTED: copper methylamine oxidase-like [Vitis vinifera] >gi|296083412|emb|CBI23365.3| unnamed protein product [Vitis vinifera]
comp28216_c0	573	392580368	EIW73495.1	222	214	456	24	104	81	51	60	62.963	268	4.82e-26	hypothetical protein TREMEDRAFT_70978 [Tremella mesenterica DSM 1558]
comp28218_c0	940	388513827	AFK44975.1	223	243	608	103	220	130	58	78	44.6154	193	6.31e-15	unknown [Lotus japonicus]
comp28226_c0	339	398407027	XP_003854979.1	151	2	310	1	103	103	98	101	95.1456	520	9.69e-66	40S ribosomal protein S14 [Mycosphaerella graminicola IPO323] >gi|339474863|gb|EGP89955.1| hypothetical protein MYCGRDRAFT_99159 [Mycosphaerella graminicola IPO323]
comp28235_c0	362	226441627	ACO57440.1	221	2	289	10	105	96	85	90	88.5417	474	1.04e-57	cholinephosphate cytidylyltransferase [Elaeis oleifera]
comp28238_c0	616	125525217	EAY73331.1	526	2	616	43	257	215	177	193	82.3256	940	1.64e-122	hypothetical protein OsI_01208 [Oryza sativa Indica Group]
comp28244_c0	449	147784408	CAN63882.1	898	2	277	38	130	93	50	65	53.7634	210	4.7e-17	hypothetical protein VITISV_002032 [Vitis vinifera]
comp28247_c0	304	380477224	CCF44272.1	107	34	303	18	107	90	75	82	83.3333	390	8.33e-47	hypothetical protein CH063_13729 [Colletotrichum higginsianum]
comp28248_c1	333	84570627	BAE72698.1	501	2	331	85	194	110	83	98	75.4545	474	5.07e-55	pseudo-response regulator 59 homologue [Lemna paucicostata]
comp28253_c0	1026	398408395	XP_003855663.1	338	2	718	100	338	239	210	223	87.8661	1115	3.22e-149	glyceraldehyde-3-phosphate dehydrogenase [Mycosphaerella graminicola IPO323] >gi|339475547|gb|EGP90639.1| glyceraldehyde-3-phosphate dehydrogenase [Mycosphaerella graminicola IPO323]
comp28265_c0	438	255555837	XP_002518954.1	165	48	350	21	132	113	49	70	43.3628	209	1.4e-18	conserved hypothetical protein [Ricinus communis] >gi|223541941|gb|EEF43487.1| conserved hypothetical protein [Ricinus communis]
comp28281_c0	212	359475635	XP_003631720.1	688	3	212	491	560	70	58	63	82.8571	309	8.92e-32	PREDICTED: L-type lectin-domain containing receptor kinase IX.1-like [Vitis vinifera]
comp28285_c0	1269	225457658	XP_002275562.1	318	68	1003	6	317	312	207	253	66.3462	979	8.5e-128	PREDICTED: bifunctional dihydroflavonol 4-reductase/flavanone 4-reductase [Vitis vinifera] >gi|297745607|emb|CBI40772.3| unnamed protein product [Vitis vinifera]
comp28286_c0	1368	359478039	XP_002265890.2	1221	4	1368	485	936	455	270	327	59.3407	1257	5.45e-158	PREDICTED: leucine-rich repeat receptor protein kinase EXS-like [Vitis vinifera]
comp28292_c0	2646	225427653	XP_002270680.1	670	473	1522	86	426	352	271	297	76.9886	1327	0	PREDICTED: beta-amylase 8-like [Vitis vinifera]
comp28302_c0	500	87162706	ABD28501.1	480	1	360	23	141	120	92	104	76.6667	507	4.2e-59	Zinc finger, C2H2-type [Medicago truncatula]
comp28310_c0	444	225442100	XP_002272652.1	132	227	388	64	117	54	22	34	40.7407	127	1.48e-07	PREDICTED: uncharacterized protein LOC100246433 [Vitis vinifera]
comp28311_c0	763	115483010	NP_001065098.1	61	20	181	3	56	54	23	36	42.5926	124	7.57e-07	Os10g0522700 [Oryza sativa Japonica Group] >gi|22122916|gb|AAM92299.1| unknown protein [Oryza sativa Japonica Group] >gi|27311272|gb|AAO00698.1| hypothetical protein LOC_Os10g37860 [Oryza sativa Japonica Group] >gi|113639707|dbj|BAF27012.1| Os10g0522700 [Oryza sativa Japonica Group] >gi|125532686|gb|EAY79251.1| hypothetical protein OsI_34368 [Oryza sativa Indica Group] >gi|125575440|gb|EAZ16724.1…
comp28312_c0	444	282848220	ADB02891.1	122	2	163	69	122	54	51	53	94.4444	264	4.13e-27	ubiquinol-cytochrome C reductase complex 14 kDa protein [Jatropha curcas]
comp28312_c1	316	338173927	AEI83504.1	122	110	316	3	71	69	53	60	76.8116	197	9.09e-18	ubiquinol-cytochrome C reductase complex 14kD subunit [Wolffia arrhiza]
comp28316_c0	1349	225435808	XP_002285758.1	228	407	1069	4	228	225	153	177	68	707	9.2e-88	PREDICTED: uncharacterized protein LOC100260398 [Vitis vinifera] >gi|147795871|emb|CAN61044.1| hypothetical protein VITISV_037529 [Vitis vinifera]
comp28317_c0	830	125597165	EAZ36945.1	845	571	681	684	720	37	32	34	86.4865	187	2.96e-13	hypothetical protein OsJ_21281 [Oryza sativa Japonica Group]
comp28324_c0	1021	255543284	XP_002512705.1	470	122	1021	6	301	307	160	207	52.1173	760	5.21e-94	conserved hypothetical protein [Ricinus communis] >gi|223548666|gb|EEF50157.1| conserved hypothetical protein [Ricinus communis]
comp28327_c0	366	398411594	XP_003857135.1	198	45	365	5	111	107	88	100	82.243	473	8.41e-58	60S ribosomal protein L6 [Mycosphaerella graminicola IPO323] >gi|339477020|gb|EGP92111.1| hypothetical protein MYCGRDRAFT_102740 [Mycosphaerella graminicola IPO323]
comp28333_c0	621	388514871	AFK45497.1	644	3	608	16	226	212	146	171	68.8679	728	2.13e-89	unknown [Lotus japonicus]
comp28350_c0	565	357142908	XP_003572733.1	143	2	286	43	137	95	78	88	82.1053	410	4.36e-48	PREDICTED: two-component response regulator ARR3-like [Brachypodium distachyon]
comp28352_c0	1442	225445216	XP_002284354.1	266	518	1324	1	265	269	212	231	78.8104	1049	3.67e-138	PREDICTED: uncharacterized protein LOC100262854 [Vitis vinifera] >gi|297738813|emb|CBI28058.3| unnamed protein product [Vitis vinifera]
comp28372_c0	533	356517257	XP_003527305.1	507	3	398	367	499	133	97	114	72.9323	540	1.88e-63	PREDICTED: beta-glucosidase 25-like [Glycine max]
comp28373_c0	1027	226532776	NP_001147766.1	184	132	683	1	184	184	173	181	94.0217	928	2.95e-123	ADP-ribosylation factor-like protein 8A [Zea mays] >gi|242062626|ref|XP_002452602.1| hypothetical protein SORBIDRAFT_04g028860 [Sorghum bicolor] >gi|195613610|gb|ACG28635.1| ADP-ribosylation factor-like protein 8A [Zea mays] >gi|195620620|gb|ACG32140.1| ADP-ribosylation factor-like protein 8A [Zea mays] >gi|241932433|gb|EES05578.1| hypothetical protein SORBIDRAFT_04g028860 [Sorghum bicolor]
comp28378_c0	953	122178461	Q1EPG7.1	201	280	873	1	199	199	94	130	47.2362	396	1.39e-43	RecName: Full=CASP-like protein MA4_106O17.50 >gi|102139805|gb|ABF69990.1| hypothetical protein MA4_106O17.50 [Musa acuminata]
comp28383_c0	298	125562819	EAZ08199.1	189	24	215	28	91	64	40	47	62.5	214	7.4e-20	hypothetical protein OsI_30460 [Oryza sativa Indica Group]
comp28389_c0	485	225434522	XP_002278620.1	384	41	445	87	220	135	91	110	67.4074	483	1.53e-56	PREDICTED: uncharacterized protein LOC100255293 [Vitis vinifera] >gi|297745864|emb|CBI15920.3| unnamed protein product [Vitis vinifera]
comp28390_c0	819	225459340	XP_002284201.1	375	315	815	202	368	167	138	153	82.6347	760	3.21e-96	PREDICTED: trehalose-phosphate phosphatase [Vitis vinifera] >gi|302141939|emb|CBI19142.3| unnamed protein product [Vitis vinifera]
comp28396_c0	792	224136213	XP_002322273.1	381	363	791	153	295	147	68	85	46.2585	261	1.41e-23	hypothetical protein POPTRDRAFT_733659 [Populus trichocarpa] >gi|222869269|gb|EEF06400.1| hypothetical protein POPTRDRAFT_733659 [Populus trichocarpa]
comp28401_c0	508	218186951	EEC69378.1	162	221	508	29	124	96	86	90	89.5833	467	1.15e-56	hypothetical protein OsI_38513 [Oryza sativa Indica Group]
comp28401_c1	414	242071801	XP_002451177.1	125	279	413	81	125	45	43	44	95.5556	218	2.47e-20	hypothetical protein SORBIDRAFT_05g025400 [Sorghum bicolor] >gi|241937020|gb|EES10165.1| hypothetical protein SORBIDRAFT_05g025400 [Sorghum bicolor]
comp28404_c0	285	388504442	AFK40287.1	223	1	282	99	192	94	48	74	51.0638	307	3.42e-33	unknown [Lotus japonicus]
comp28416_c0	1711	296082532	CBI21537.3	335	259	1263	1	335	335	275	310	82.0896	1410	0	unnamed protein product [Vitis vinifera]
comp28429_c0	319	255552225	XP_002517157.1	526	2	244	17	97	81	58	68	71.6049	305	3.64e-31	chloroplast-targeted copper chaperone, putative [Ricinus communis] >gi|223543792|gb|EEF45320.1| chloroplast-targeted copper chaperone, putative [Ricinus communis]
comp28432_c0	936	144954332	ABP04242.1	222	282	842	34	222	189	104	136	55.0265	517	2.53e-61	calmodulin-like protein [Elaeis guineensis]
comp28436_c0	1641	225426294	XP_002267317.1	316	427	1260	35	312	278	186	225	66.9065	1051	7.61e-137	PREDICTED: E3 ubiquitin-protein ligase SINAT5 [Vitis vinifera] >gi|297742353|emb|CBI34502.3| unnamed protein product [Vitis vinifera]
comp28440_c0	285	303738	BAA02110.1	225	1	213	4	74	71	62	66	87.3239	332	7.03e-37	GTP-binding protein [Pisum sativum] >gi|738935|prf||2001457C GTP-binding protein
comp28441_c0	1500	388513425	AFK44774.1	348	155	1144	16	347	332	234	283	70.4819	1286	1.57e-172	unknown [Lotus japonicus]
comp28442_c0	1147	297740356	CBI30538.3	405	123	983	122	401	287	209	238	72.8223	1106	3.12e-146	unnamed protein product [Vitis vinifera]
comp28443_c0	287	162459846	NP_001105276.1	323	3	101	290	323	34	24	29	70.5882	136	2.03e-08	salt-inducible protein kinase [Zea mays] >gi|52783745|gb|AAU87044.1| salt-inducible protein kinase [Zea mays]
comp28444_c0	1449	147780251	CAN65744.1	1076	522	929	286	423	138	53	82	38.4058	256	1.8e-48	hypothetical protein VITISV_037761 [Vitis vinifera]
comp28448_c0	342	296082479	CBI21484.3	590	54	338	13	107	95	50	66	52.6316	273	2.31e-26	unnamed protein product [Vitis vinifera]
comp28452_c0	368	357438833	XP_003589693.1	500	152	367	50	126	77	34	50	44.1558	177	1.83e-19	Cytochrome P450 [Medicago truncatula] >gi|355478741|gb|AES59944.1| Cytochrome P450 [Medicago truncatula]
comp28454_c0	1845	255539234	XP_002510682.1	381	337	1407	1	367	367	226	280	61.5804	1192	4.55e-156	receptor serine-threonine protein kinase, putative [Ricinus communis] >gi|223551383|gb|EEF52869.1| receptor serine-threonine protein kinase, putative [Ricinus communis]
comp28460_c0	932	242095294	XP_002438137.1	208	276	788	33	203	171	121	150	70.7602	689	2.55e-87	hypothetical protein SORBIDRAFT_10g008620 [Sorghum bicolor] >gi|241916360|gb|EER89504.1| hypothetical protein SORBIDRAFT_10g008620 [Sorghum bicolor]
comp28466_c0	830	356515476	XP_003526426.1	140	99	452	21	139	119	76	92	63.8655	404	5.8e-46	PREDICTED: EG45-like domain containing protein-like [Glycine max]
comp28476_c0	505	148906134	ABR16225.1	399	300	362	185	205	21	17	20	80.9524	98	1.82e-09	unknown [Picea sitchensis]
comp28482_c0	485	359496315	XP_003635207.1	60	33	158	1	42	42	23	30	54.7619	113	6.02e-06	PREDICTED: uncharacterized protein LOC100853563 [Vitis vinifera]
comp28499_c0	2069	359496529	XP_002272810.2	420	483	1736	1	420	421	311	365	73.8717	1691	0	PREDICTED: protein MID1-COMPLEMENTING ACTIVITY 1-like [Vitis vinifera]
comp28500_c0	968	225427631	XP_002269914.1	201	207	797	5	201	197	89	128	45.1777	422	2.35e-47	PREDICTED: uncharacterized protein LOC100252848 [Vitis vinifera]
comp28507_c0	1895	49798480	AAT68601.1	460	318	1646	5	446	443	329	383	74.2664	1791	0	benzoyl coenzyme A: benzyl alcohol benzoyl transferase [Petunia x hybrida] >gi|51556912|gb|AAU06226.1| benzoyl-CoA:benzyl alcohol/phenylethanol benzoyltransferase [Petunia x hybrida]
comp28510_c0	1501	326521414	BAJ96910.1	926	21	1412	447	917	489	197	278	40.2863	772	2.77e-89	predicted protein [Hordeum vulgare subsp. vulgare]
comp28519_c0	365	392579981	EIW73108.1	158	1	261	33	119	87	69	77	79.3103	365	3.38e-42	hypothetical protein TREMEDRAFT_37151 [Tremella mesenterica DSM 1558]
comp28523_c0	383	189198788	XP_001935731.1	92	86	361	1	92	92	84	87	91.3043	429	1.84e-52	60S ribosomal protein L37a [Pyrenophora tritici-repentis Pt-1C-BFP] >gi|330906022|ref|XP_003295325.1| hypothetical protein PTT_00414 [Pyrenophora teres f. teres 0-1] >gi|187982830|gb|EDU48318.1| 60S ribosomal protein L37a [Pyrenophora tritici-repentis Pt-1C-BFP] >gi|311333483|gb|EFQ96582.1| hypothetical protein PTT_00414 [Pyrenophora teres f. teres 0-1]
comp28529_c1	210	147782487	CAN68434.1	171	1	189	3	65	63	42	44	66.6667	206	3.08e-19	hypothetical protein VITISV_002078 [Vitis vinifera]
comp28533_c0	344	224100365	XP_002311848.1	363	35	343	162	264	103	83	96	80.5825	453	4.37e-53	hypothetical protein POPTRDRAFT_820938 [Populus trichocarpa] >gi|222851668|gb|EEE89215.1| hypothetical protein POPTRDRAFT_820938 [Populus trichocarpa]
comp28534_c0	2164	225458487	XP_002284114.1	514	404	1933	6	514	513	445	485	86.7446	2228	0	PREDICTED: lysine histidine transporter-like 8 [Vitis vinifera] >gi|302142384|emb|CBI19587.3| unnamed protein product [Vitis vinifera]
comp28535_c0	506	115439689	NP_001044124.1	387	2	475	228	387	161	78	104	48.4472	370	7.68e-40	Os01g0727800 [Oryza sativa Japonica Group] >gi|113533655|dbj|BAF06038.1| Os01g0727800 [Oryza sativa Japonica Group]
comp28536_c0	1999	225462348	XP_002269152.1	535	441	1676	68	510	452	260	317	57.5221	1348	1.54e-176	PREDICTED: zinc finger CCCH domain-containing protein 37 [Vitis vinifera] >gi|297736083|emb|CBI24121.3| unnamed protein product [Vitis vinifera]
comp28539_c0	1416	359491192	XP_003634238.1	571	1	1134	190	566	378	189	257	50	971	2.38e-122	PREDICTED: LOW QUALITY PROTEIN: cytochrome P450 71A4-like [Vitis vinifera]
comp28539_c1	322	357521101	XP_003630839.1	283	1	219	57	129	73	42	55	57.5342	233	6.67e-22	Cytochrome P450 [Medicago truncatula] >gi|355524861|gb|AET05315.1| Cytochrome P450 [Medicago truncatula]
comp28556_c0	1380	218195442	EEC77869.1	616	72	1376	159	615	465	267	314	57.4194	1177	8.57e-153	hypothetical protein OsI_17137 [Oryza sativa Indica Group]
comp28557_c0	878	255571236	XP_002526568.1	597	3	722	336	574	240	172	201	71.6667	894	3.07e-113	oligopeptide transporter, putative [Ricinus communis] >gi|223534129|gb|EEF35846.1| oligopeptide transporter, putative [Ricinus communis]
comp28561_c0	745	392589328	EIW78659.1	237	356	625	91	177	90	59	71	65.5556	152	1.14e-09	hypothetical protein CONPUDRAFT_156624 [Coniophora puteana RWD-64-598 SS2]
comp28568_c0	640	115478342	NP_001062766.1	207	3	392	78	207	130	103	116	79.2308	464	5.04e-55	Os09g0280600 [Oryza sativa Japonica Group] >gi|49387852|dbj|BAD26517.1| putative MND1 domain containing protein [Oryza sativa Japonica Group] >gi|113630999|dbj|BAF24680.1| Os09g0280600 [Oryza sativa Japonica Group] >gi|218201818|gb|EEC84245.1| hypothetical protein OsI_30685 [Oryza sativa Indica Group] >gi|222641210|gb|EEE69342.1| hypothetical protein OsJ_28662 [Oryza sativa Japonica Group]
comp28569_c0	894	225454698	XP_002271034.1	123	278	607	8	117	110	84	101	76.3636	474	2.49e-56	PREDICTED: uncharacterized protein LOC100244367 [Vitis vinifera] >gi|297737272|emb|CBI26473.3| unnamed protein product [Vitis vinifera]
comp28585_c0	254	359473499	XP_003631308.1	464	23	178	155	206	52	33	39	63.4615	162	8.01e-12	PREDICTED: uncharacterized protein LOC100853922 [Vitis vinifera]
comp28586_c0	546	154305146	XP_001552976.1	586	3	545	271	451	181	125	146	69.0608	660	2.46e-80	hypothetical protein BC1G_08663 [Botryotinia fuckeliana B05.10] >gi|150853826|gb|EDN29018.1| hypothetical protein BC1G_08663 [Botryotinia fuckeliana B05.10] >gi|347838753|emb|CCD53325.1| similar to inorganic phosphate transporter [Botryotinia fuckeliana]
comp28589_c0	702	359474056	XP_002275095.2	521	1	633	4	233	242	103	127	42.562	331	4.54e-33	PREDICTED: uncharacterized protein LOC100242735 [Vitis vinifera]
comp28596_c0	916	357112807	XP_003558198.1	788	192	914	1	270	287	158	183	55.0523	621	2.78e-71	PREDICTED: ABC transporter G family member 16-like [Brachypodium distachyon]
comp28598_c0	1640	296088921	CBI38481.3	665	283	1524	62	473	414	256	329	61.8357	1395	0	unnamed protein product [Vitis vinifera]
comp28599_c0	447	297723645	NP_001174186.1	1056	283	447	708	762	55	30	43	54.5455	161	1e-11	Os05g0117798 [Oryza sativa Japonica Group] >gi|55168343|gb|AAV44208.1| putative kinesin [Oryza sativa Japonica Group] >gi|215697076|dbj|BAG91070.1| unnamed protein product [Oryza sativa Japonica Group] >gi|222629989|gb|EEE62121.1| hypothetical protein OsJ_16908 [Oryza sativa Japonica Group] >gi|255675964|dbj|BAH92914.1| Os05g0117798 [Oryza sativa Japonica Group]
comp28603_c0	702	357515489	XP_003628033.1	670	351	695	127	248	122	46	67	37.7049	196	1.17e-14	S-locus lectin protein kinase family protein [Medicago truncatula] >gi|355522055|gb|AET02509.1| S-locus lectin protein kinase family protein [Medicago truncatula]
comp28609_c0	791	359480321	XP_003632432.1	610	34	789	1	282	282	170	195	60.2837	861	1.21e-108	PREDICTED: xyloglucan galactosyltransferase KATAMARI1-like [Vitis vinifera]
comp28615_c0	462	115467096	NP_001057147.1	149	40	399	28	147	120	70	92	58.3333	388	3.76e-45	Os06g0216700 [Oryza sativa Japonica Group] >gi|51090408|dbj|BAD35330.1| glycine-rich protein-like [Oryza sativa Japonica Group] >gi|51091142|dbj|BAD35838.1| glycine-rich protein-like [Oryza sativa Japonica Group] >gi|113595187|dbj|BAF19061.1| Os06g0216700 [Oryza sativa Japonica Group] >gi|125554554|gb|EAZ00160.1| hypothetical protein OsI_22165 [Oryza sativa Indica Group] >gi|125596496|gb|EAZ36276…
comp28621_c0	1241	147818682	CAN76185.1	854	362	1240	558	850	293	250	269	85.3242	1374	4.53e-180	hypothetical protein VITISV_023086 [Vitis vinifera]
comp28624_c0	228	242794679	XP_002482424.1	256	3	227	116	190	75	70	71	93.3333	362	2.33e-41	40S ribosomal protein S3Ae [Talaromyces stipitatus ATCC 10500] >gi|269969614|sp|B8MBY6.1|RS3A_TALSN RecName: Full=40S ribosomal protein S1 >gi|218719012|gb|EED18432.1| 40S ribosomal protein S3Ae [Talaromyces stipitatus ATCC 10500]
comp28627_c0	624	242053873	XP_002456082.1	406	2	541	224	403	180	128	155	71.1111	724	1.63e-91	hypothetical protein SORBIDRAFT_03g030090 [Sorghum bicolor] >gi|241928057|gb|EES01202.1| hypothetical protein SORBIDRAFT_03g030090 [Sorghum bicolor]
comp28638_c0	681	297599443	NP_001047160.2	279	13	510	1	159	176	86	102	48.8636	341	1.01e-35	Os02g0564400 [Oryza sativa Japonica Group] >gi|255671010|dbj|BAF09074.2| Os02g0564400 [Oryza sativa Japonica Group]
comp28644_c0	568	225424380	XP_002284904.1	637	60	326	42	130	89	67	75	75.2809	327	1.11e-32	PREDICTED: microtubule-associated protein 70-2 [Vitis vinifera] >gi|297737627|emb|CBI26828.3| unnamed protein product [Vitis vinifera]
comp28656_c0	204	46125107	XP_387107.1	90	39	203	36	90	55	55	55	100	280	4.83e-31	hypothetical protein FG06931.1 [Gibberella zeae PH-1]
comp28662_c0	475	224144308	XP_002325255.1	68	213	404	1	64	64	42	50	65.625	222	2.32e-21	predicted protein [Populus trichocarpa] >gi|222866689|gb|EEF03820.1| predicted protein [Populus trichocarpa]
comp28670_c0	262	297801438	XP_002868603.1	189	1	183	1	61	61	55	60	90.1639	301	9.25e-33	hypothetical protein ARALYDRAFT_493844 [Arabidopsis lyrata subsp. lyrata] >gi|297314439|gb|EFH44862.1| hypothetical protein ARALYDRAFT_493844 [Arabidopsis lyrata subsp. lyrata]
comp28685_c0	342	357462189	XP_003601376.1	638	2	142	592	638	47	42	47	89.3617	233	7.67e-21	Receptor-like protein kinase [Medicago truncatula] >gi|355490424|gb|AES71627.1| Receptor-like protein kinase [Medicago truncatula]
comp28687_c0	598	296083162	CBI22798.3	243	257	598	20	133	114	78	92	68.4211	409	1.46e-46	unnamed protein product [Vitis vinifera]
comp28699_c0	334	222628994	EEE61126.1	455	36	332	318	416	99	65	85	65.6566	350	1.33e-37	hypothetical protein OsJ_15055 [Oryza sativa Japonica Group]
comp28702_c0	1704	225453590	XP_002263621.1	308	219	1115	4	306	303	211	245	69.637	899	7.96e-114	PREDICTED: probable S-acyltransferase At4g00840 isoform 1 [Vitis vinifera] >gi|296088993|emb|CBI38696.3| unnamed protein product [Vitis vinifera]
comp28714_c0	914	147819279	CAN73358.1	176	563	895	4	122	119	55	77	46.2185	280	3.14e-27	hypothetical protein VITISV_012626 [Vitis vinifera]
comp28720_c0	300	326505250	BAK03012.1	313	3	299	42	140	99	82	87	82.8283	379	7.62e-43	predicted protein [Hordeum vulgare subsp. vulgare]
comp28722_c0	1337	224142341	XP_002324517.1	344	187	1116	24	344	321	185	240	57.6324	829	1.61e-104	predicted protein [Populus trichocarpa] >gi|222865951|gb|EEF03082.1| predicted protein [Populus trichocarpa]
comp28723_c0	2226	255587629	XP_002534335.1	578	402	2078	1	569	588	289	388	49.1497	1283	3.37e-165	RNA binding protein, putative [Ricinus communis] >gi|223525472|gb|EEF28048.1| RNA binding protein, putative [Ricinus communis]
comp28726_c0	1615	225454577	XP_002267544.1	457	286	1365	52	457	406	215	270	52.9557	1020	2.94e-130	PREDICTED: uncharacterized protein LOC100254610 [Vitis vinifera]
comp28733_c0	515	332268657	AEE37094.1	196	3	284	9	102	94	81	89	86.1702	448	2.22e-53	MYB transcription factor [Crocus sativus]
comp28737_c0	868	255568854	XP_002525398.1	423	176	868	1	231	231	188	210	81.3853	1036	7.04e-137	ATP-citrate synthase, putative [Ricinus communis] >gi|223535361|gb|EEF37036.1| ATP-citrate synthase, putative [Ricinus communis]
comp28739_c0	487	356557753	XP_003547175.1	510	1	222	37	110	74	55	67	74.3243	317	4.18e-32	PREDICTED: CBL-interacting serine/threonine-protein kinase 12-like [Glycine max]
comp28749_c0	2009	242081043	XP_002445290.1	311	1015	1776	59	311	254	160	200	62.9921	880	1.12e-109	hypothetical protein SORBIDRAFT_07g007860 [Sorghum bicolor] >gi|241941640|gb|EES14785.1| hypothetical protein SORBIDRAFT_07g007860 [Sorghum bicolor]
comp28751_c0	1187	396474269	XP_003839531.1	293	234	1052	20	292	277	164	202	59.2058	786	2.1e-99	hypothetical protein LEMA_P032040.1 [Leptosphaeria maculans JN3] >gi|312216100|emb|CBX96052.1| hypothetical protein LEMA_P032040.1 [Leptosphaeria maculans JN3]
comp28754_c0	389	309951240	CBX43990.1	154	49	387	19	130	113	86	98	76.1062	423	9.46e-51	putative A-type response regulator 8 [Populus x canadensis]
comp28756_c0	310	297738913	CBI28158.3	450	35	310	93	183	92	60	75	65.2174	314	1.03e-32	unnamed protein product [Vitis vinifera]
comp28762_c0	242	255544143	XP_002513134.1	66	84	224	18	60	47	28	37	59.5745	144	6.27e-11	conserved hypothetical protein [Ricinus communis] >gi|223548145|gb|EEF49637.1| conserved hypothetical protein [Ricinus communis]
comp28779_c0	1011	156556174	CAO94661.1	626	99	989	1	303	306	193	230	63.0719	938	9.18e-119	ATP Binding Cassette Transporter (CrWBC1) [Catharanthus roseus]
comp28787_c0	1169	255559422	XP_002520731.1	174	425	946	1	174	174	160	170	91.954	886	2.27e-116	n-acetyltransferase, putative [Ricinus communis] >gi|223540116|gb|EEF41693.1| n-acetyltransferase, putative [Ricinus communis]
comp28789_c0	349	357144889	XP_003573449.1	1135	1	348	422	537	116	107	110	92.2414	615	1.54e-72	PREDICTED: topless-related protein 1-like [Brachypodium distachyon]
comp28793_c0	283	261196982	XP_002624894.1	88	2	247	4	85	82	75	80	91.4634	412	1.74e-50	30S ribosomal protein S21e [Ajellomyces dermatitidis SLH14081] >gi|239596139|gb|EEQ78720.1| 30S ribosomal protein S21e [Ajellomyces dermatitidis SLH14081] >gi|239609725|gb|EEQ86712.1| 30S ribosomal protein S21e [Ajellomyces dermatitidis ER-3] >gi|327355387|gb|EGE84244.1| ribosomal protein S21e [Ajellomyces dermatitidis ATCC 18188]
comp28797_c0	351	62319756	BAD93737.1	59	173	271	25	57	33	26	30	78.7879	124	1.16e-07	glycoprotein homolog [Arabidopsis thaliana]
comp28807_c0	207	356495913	XP_003516815.1	501	1	114	462	499	38	22	28	57.8947	126	3.81e-07	PREDICTED: cytochrome P450 83B1-like [Glycine max]
comp28810_c0	1006	357144884	XP_003573447.1	168	373	849	2	160	159	90	120	56.6038	456	1.16e-52	PREDICTED: uncharacterized protein LOC100831753 [Brachypodium distachyon]
comp28811_c0	516	225457401	XP_002284890.1	83	118	312	22	82	68	28	38	41.1765	127	1.2e-07	PREDICTED: uncharacterized protein LOC100251924 [Vitis vinifera] >gi|297733968|emb|CBI15215.3| unnamed protein product [Vitis vinifera]
comp28817_c0	942	226499146	NP_001144255.1	267	43	825	6	266	265	170	200	64.1509	893	3.23e-117	uncharacterized protein LOC100277126 [Zea mays] >gi|195639116|gb|ACG39026.1| hypothetical protein [Zea mays]
comp28834_c0	1823	224092798	XP_002309707.1	481	295	1587	56	479	436	271	324	62.156	1304	1.54e-171	predicted protein [Populus trichocarpa] >gi|222852610|gb|EEE90157.1| predicted protein [Populus trichocarpa]
comp28835_c0	1476	326524912	BAK04392.1	398	749	1087	81	193	113	83	96	73.4513	469	2.77e-50	predicted protein [Hordeum vulgare subsp. vulgare]
comp28840_c0	636	392575785	EIW68917.1	198	30	623	1	198	198	168	185	84.8485	901	3.71e-121	hypothetical protein TREMEDRAFT_44204 [Tremella mesenterica DSM 1558]
comp28848_c0	703	225447436	XP_002266103.1	127	234	539	26	127	102	76	87	74.5098	408	2.43e-47	PREDICTED: uncharacterized protein LOC100252893 [Vitis vinifera]
comp28855_c0	542	255561311	XP_002521666.1	219	49	360	12	112	104	61	78	58.6538	220	1.99e-19	conserved hypothetical protein [Ricinus communis] >gi|223539057|gb|EEF40653.1| conserved hypothetical protein [Ricinus communis]
comp28860_c0	519	359497847	XP_003635668.1	478	37	369	96	206	111	32	66	28.8288	188	2.78e-14	PREDICTED: uncharacterized protein LOC100854178, partial [Vitis vinifera]
comp28876_c0	597	224135737	XP_002322148.1	82	181	438	1	82	86	43	50	50	177	2.4e-14	predicted protein [Populus trichocarpa] >gi|222869144|gb|EEF06275.1| predicted protein [Populus trichocarpa]
comp28880_c0	474	224136061	XP_002322230.1	326	82	399	1	122	125	54	73	43.2	177	2.01e-13	predicted protein [Populus trichocarpa] >gi|222869226|gb|EEF06357.1| predicted protein [Populus trichocarpa]
comp28881_c0	1092	225441601	XP_002281697.1	225	101	784	1	225	228	190	204	83.3333	1009	1.48e-134	PREDICTED: eukaryotic translation initiation factor 4E type 3 [Vitis vinifera] >gi|297739767|emb|CBI29949.3| unnamed protein product [Vitis vinifera]
comp28884_c0	753	225456475	XP_002284543.1	862	2	313	738	841	104	75	90	72.1154	443	3.06e-47	PREDICTED: auxin response factor 2 [Vitis vinifera] >gi|297734502|emb|CBI15749.3| unnamed protein product [Vitis vinifera]
comp28884_c1	1366	225456475	XP_002284543.1	862	1	1365	287	743	469	248	308	52.8785	1058	4.27e-132	PREDICTED: auxin response factor 2 [Vitis vinifera] >gi|297734502|emb|CBI15749.3| unnamed protein product [Vitis vinifera]
comp28885_c0	761	357123737	XP_003563564.1	124	339	542	23	90	68	47	56	69.1176	252	4.43e-24	PREDICTED: indole-3-acetic acid-induced protein ARG7-like [Brachypodium distachyon]
comp28887_c0	920	359483145	XP_003632911.1	255	137	832	24	255	232	149	177	64.2241	782	9.41e-101	PREDICTED: acid phosphatase 1-like [Vitis vinifera]
comp28892_c0	281	125582167	EAZ23098.1	181	3	281	88	180	93	71	81	76.3441	373	1.67e-43	hypothetical protein OsJ_06792 [Oryza sativa Japonica Group]
comp28895_c0	1968	356539740	XP_003538352.1	429	671	1657	87	429	345	212	258	61.4493	960	4.77e-120	PREDICTED: uncharacterized protein LOC100781154 [Glycine max]
comp28903_c0	332	110349562	ABG73256.1	129	118	300	2	62	61	49	52	80.3279	244	1.71e-24	class III HD-Zip protein HDZ32A [Austrobaileya scandens]
comp28909_c0	681	297740396	CBI30578.3	71	92	208	33	71	39	36	37	92.3077	190	4.17e-16	unnamed protein product [Vitis vinifera]
comp28912_c0	719	224088330	XP_002308412.1	1027	2	469	872	1027	156	147	155	94.2308	766	1.26e-91	cellulose synthase [Populus trichocarpa] >gi|222854388|gb|EEE91935.1| cellulose synthase [Populus trichocarpa]
comp28919_c0	1403	242049264	XP_002462376.1	119	1078	1362	1	95	95	90	93	94.7368	469	9.34e-54	hypothetical protein SORBIDRAFT_02g024610 [Sorghum bicolor] >gi|241925753|gb|EER98897.1| hypothetical protein SORBIDRAFT_02g024610 [Sorghum bicolor]
comp28922_c0	2095	225464142	XP_002265566.1	248	895	1653	1	248	253	184	207	72.7273	837	5.71e-104	PREDICTED: protein YIPF5 [Vitis vinifera]
comp28926_c0	1268	102139757	ABF69964.1	306	151	1131	1	304	332	170	198	51.2048	600	4.48e-71	DNA-binding WRKY domain-containing protein [Musa acuminata]
comp28927_c0	1058	356552918	XP_003544809.1	175	147	674	1	175	177	99	119	55.9322	435	2.96e-49	PREDICTED: cytochrome c oxidase subunit 6b-1-like [Glycine max]
comp28929_c0	826	297811393	XP_002873580.1	535	3	770	1	260	260	174	203	66.9231	885	6.82e-113	calmodulin-domain protein kinase 7 [Arabidopsis lyrata subsp. lyrata] >gi|297319417|gb|EFH49839.1| calmodulin-domain protein kinase 7 [Arabidopsis lyrata subsp. lyrata]
comp28930_c0	728	113913391	ABI48859.1	112	333	578	23	111	89	59	66	66.2921	271	3.55e-27	LLA-115 [Lilium longiflorum] >gi|189409350|gb|ACD93462.1| tapetum-specific protein LLA-115 [Lilium longiflorum]
comp28931_c0	3334	255573685	XP_002527764.1	921	1651	2931	495	921	427	352	394	82.4356	1895	0	eukaryotic translation initiation factor 2c, putative [Ricinus communis] >gi|223532851|gb|EEF34625.1| eukaryotic translation initiation factor 2c, putative [Ricinus communis]
comp28932_c0	482	224141031	XP_002323878.1	400	114	482	1	125	127	94	101	74.0157	284	7.99e-28	AP2/ERF domain-containing transcription factor [Populus trichocarpa] >gi|222866880|gb|EEF04011.1| AP2/ERF domain-containing transcription factor [Populus trichocarpa]
comp28935_c0	598	125542289	EAY88428.1	222	2	514	1	170	171	110	139	64.3275	588	1.39e-73	hypothetical protein OsI_09892 [Oryza sativa Indica Group]
comp28935_c1	483	346464991	AEO32340.1	201	313	483	144	201	58	42	49	72.4138	231	3.04e-21	hypothetical protein [Amblyomma maculatum]
comp28939_c0	1904	225433650	XP_002264734.1	397	141	1214	35	395	364	220	275	60.4396	1059	1.3e-135	PREDICTED: uncharacterized protein LOC100261667 [Vitis vinifera] >gi|296089602|emb|CBI39421.3| unnamed protein product [Vitis vinifera]
comp28940_c0	687	242065068	XP_002453823.1	174	118	579	7	157	154	105	126	68.1818	502	7.81e-61	hypothetical protein SORBIDRAFT_04g019220 [Sorghum bicolor] >gi|241933654|gb|EES06799.1| hypothetical protein SORBIDRAFT_04g019220 [Sorghum bicolor]
comp28946_c1	382	224112413	XP_002316180.1	69	2	127	28	69	42	41	42	97.619	210	5.46e-20	predicted protein [Populus trichocarpa] >gi|224133246|ref|XP_002327996.1| predicted protein [Populus trichocarpa] >gi|356512333|ref|XP_003524874.1| PREDICTED: 60S ribosomal protein L38-like [Glycine max] >gi|356525108|ref|XP_003531169.1| PREDICTED: 60S ribosomal protein L38-like [Glycine max] >gi|356549134|ref|XP_003542952.1| PREDICTED: 60S ribosomal protein L38 [Glycine max] >gi|356555492|ref|XP…
comp28949_c0	2018	225424594	XP_002282185.1	526	214	1731	12	521	510	340	406	66.6667	1781	0	PREDICTED: cytochrome P450 86B1 [Vitis vinifera]
comp28950_c0	235	224146594	XP_002326064.1	865	41	232	512	576	65	41	52	63.0769	213	1.46e-18	predicted protein [Populus trichocarpa] >gi|222862939|gb|EEF00446.1| predicted protein [Populus trichocarpa]
comp28951_c0	660	242065738	XP_002454158.1	77	103	333	1	77	77	70	76	90.9091	396	2.25e-46	hypothetical protein SORBIDRAFT_04g025700 [Sorghum bicolor] >gi|241933989|gb|EES07134.1| hypothetical protein SORBIDRAFT_04g025700 [Sorghum bicolor]
comp28955_c0	743	242815719	XP_002486625.1	57	78	248	1	57	57	50	55	87.7193	255	2.32e-25	stress response RCI peptide, putative [Talaromyces stipitatus ATCC 10500] >gi|218714964|gb|EED14387.1| stress response RCI peptide, putative [Talaromyces stipitatus ATCC 10500]
comp28956_c0	895	224070678	XP_002303194.1	101	162	377	4	79	76	45	56	59.2105	230	5.17e-21	predicted protein [Populus trichocarpa] >gi|118486915|gb|ABK95291.1| unknown [Populus trichocarpa] >gi|222840626|gb|EEE78173.1| predicted protein [Populus trichocarpa]
comp28959_c0	491	224134793	XP_002321907.1	109	3	323	2	109	108	52	73	48.1481	276	8.62e-29	predicted protein [Populus trichocarpa] >gi|222868903|gb|EEF06034.1| predicted protein [Populus trichocarpa]
comp28963_c0	4084	225433707	XP_002268048.1	1034	904	3990	1	1030	1032	859	949	83.2364	4424	0	PREDICTED: probable importin-7 homolog [Vitis vinifera]
comp28966_c0	226	171191094	ACB45099.1	859	5	142	782	827	46	30	35	65.2174	171	7.2e-13	putative lectin receptor kinase-like protein [Citrus limon]
comp28968_c0	2587	224068823	XP_002302834.1	650	228	2195	6	650	657	529	589	80.5175	2692	0	predicted protein [Populus trichocarpa] >gi|222844560|gb|EEE82107.1| predicted protein [Populus trichocarpa]
comp28971_c0	1460	225461798	XP_002283666.1	293	516	1397	1	292	296	163	200	55.0676	685	3.51e-83	PREDICTED: probable salt tolerance-like protein At1g78600 [Vitis vinifera] >gi|302142816|emb|CBI20111.3| unnamed protein product [Vitis vinifera]
comp28974_c0	872	225432288	XP_002273010.1	187	301	861	1	187	187	143	163	76.4706	784	3.3e-102	PREDICTED: 60S ribosome subunit biogenesis protein NIP7 homolog [Vitis vinifera]
comp28978_c0	344	297740767	CBI30949.3	160	2	232	82	160	79	62	73	78.481	322	8.43e-36	unnamed protein product [Vitis vinifera]
comp28979_c0	1086	223944281	ACN26224.1	241	109	777	1	223	226	143	171	63.2743	669	4.53e-83	unknown [Zea mays]
comp28982_c0	746	300508140	BAJ10902.1	172	172	573	23	171	149	70	91	46.9799	342	8.13e-37	tuber lectin 1 [Dioscorea polystachya]
comp28989_c0	614	225442495	XP_002278380.1	192	22	576	4	189	192	119	149	61.9792	602	4.19e-76	PREDICTED: uncharacterized protein LOC100254824 [Vitis vinifera]
comp28990_c0	1058	357494535	XP_003617556.1	297	174	512	49	161	113	52	69	46.0177	266	4.48e-24	Geranylgeranyl pyrophosphate synthase [Medicago truncatula] >gi|355518891|gb|AET00515.1| Geranylgeranyl pyrophosphate synthase [Medicago truncatula]
comp28999_c0	1272	195648338	ACG43637.1	174	205	720	1	174	174	124	148	71.2644	597	1.65e-72	hypothetical protein [Zea mays]
comp29000_c0	1128	225458850	XP_002285355.1	197	278	811	3	181	179	157	167	87.7095	850	9.48e-111	PREDICTED: pollen-specific protein SF3 [Vitis vinifera] >gi|147785329|emb|CAN72849.1| hypothetical protein VITISV_013939 [Vitis vinifera] >gi|302142193|emb|CBI19396.3| unnamed protein product [Vitis vinifera]
comp29003_c1	563	255553155	XP_002517620.1	163	84	491	27	156	136	81	98	59.5588	427	2.53e-50	conserved hypothetical protein [Ricinus communis] >gi|223543252|gb|EEF44784.1| conserved hypothetical protein [Ricinus communis]
comp29005_c0	911	226496231	NP_001146334.1	357	1	675	1	226	227	177	204	77.9736	988	1.89e-130	uncharacterized protein LOC100279910 [Zea mays] >gi|219886673|gb|ACL53711.1| unknown [Zea mays]
comp29005_c1	250	226496231	NP_001146334.1	357	1	249	221	303	83	81	83	97.5904	440	9.41e-52	uncharacterized protein LOC100279910 [Zea mays] >gi|219886673|gb|ACL53711.1| unknown [Zea mays]
comp29011_c0	643	242078751	XP_002444144.1	149	78	500	8	149	142	101	117	71.1268	564	8.87e-71	hypothetical protein SORBIDRAFT_07g009530 [Sorghum bicolor] >gi|241940494|gb|EES13639.1| hypothetical protein SORBIDRAFT_07g009530 [Sorghum bicolor]
comp29012_c0	1277	242077364	XP_002448618.1	300	224	820	68	261	199	153	173	76.8844	804	1.13e-101	hypothetical protein SORBIDRAFT_06g030260 [Sorghum bicolor] >gi|241939801|gb|EES12946.1| hypothetical protein SORBIDRAFT_06g030260 [Sorghum bicolor]
comp29013_c0	1059	115445439	NP_001046499.1	188	160	723	1	188	188	181	184	96.2766	961	4.41e-128	Os02g0265400 [Oryza sativa Japonica Group] >gi|50251955|dbj|BAD27890.1| putative vacuolar protein sorting; Vps29p [Oryza sativa Japonica Group] >gi|113536030|dbj|BAF08413.1| Os02g0265400 [Oryza sativa Japonica Group] >gi|125538892|gb|EAY85287.1| hypothetical protein OsI_06659 [Oryza sativa Indica Group] >gi|215701252|dbj|BAG92676.1| unnamed protein product [Oryza sativa Japonica Group] >gi|215765…
comp29014_c0	789	255581223	XP_002531424.1	1015	3	563	831	1015	187	96	129	51.3369	520	2.45e-57	receptor-kinase, putative [Ricinus communis] >gi|223528974|gb|EEF30966.1| receptor-kinase, putative [Ricinus communis]
comp29016_c0	812	226510506	NP_001148206.1	141	304	717	2	141	140	116	128	82.8571	600	2.31e-75	LOC100281814 [Zea mays] >gi|242049468|ref|XP_002462478.1| hypothetical protein SORBIDRAFT_02g026370 [Sorghum bicolor] >gi|195616690|gb|ACG30175.1| transmembrane protein 50A [Zea mays] >gi|195639370|gb|ACG39153.1| transmembrane protein 50A [Zea mays] >gi|241925855|gb|EER98999.1| hypothetical protein SORBIDRAFT_02g026370 [Sorghum bicolor]
comp29021_c0	680	357137675	XP_003570425.1	88	384	599	1	72	72	55	64	76.3889	315	4.46e-34	PREDICTED: uncharacterized protein LOC100841437 isoform 1 [Brachypodium distachyon] >gi|357137677|ref|XP_003570426.1| PREDICTED: uncharacterized protein LOC100841437 isoform 2 [Brachypodium distachyon]
comp29022_c0	1373	116788038	ABK24734.1	251	120	872	1	250	251	211	231	84.0637	1168	9.33e-157	unknown [Picea sitchensis] >gi|116791293|gb|ABK25924.1| unknown [Picea sitchensis]
comp29032_c0	1837	359485208	XP_003633232.1	419	188	1450	1	418	421	289	343	68.6461	1589	0	PREDICTED: LOW QUALITY PROTEIN: tyrosine aminotransferase-like [Vitis vinifera]
comp29038_c0	421	359492369	XP_002284600.2	1817	101	322	1624	1697	74	32	43	43.2432	151	2.1e-09	PREDICTED: uncharacterized protein LOC100248990 [Vitis vinifera]
comp29039_c0	1764	215769072	BAH01301.1	369	80	1183	2	369	368	282	323	76.6304	1337	1.68e-178	unnamed protein product [Oryza sativa Japonica Group] >gi|222642118|gb|EEE70250.1| hypothetical protein OsJ_30372 [Oryza sativa Japonica Group]
[truncated: 20,838 more rows]
